# Supplementary material for: Palladium-catalyzed triple coupling of 2-iodoanisoles with aryl iodides to access 6H-dibenzopyrans
Source: Royal Society of Chemistry journal article supplement (doi:10.1039/d2qo00738j), 2022-01-01

## Palladium-catalyzed triple coupling of 2-iodoanisoles with aryl iodides to access 6*H*-dibenzopyrans

Li-Ping Chen, Shu-Lin, Cheng, Xin-Yue Fan, Ji-Fa Zhu, Bi-Qin Wang, Chun Feng,\* and Shi-Kai Xiang\*

College of Chemistry and Materials Science, Sichuan Normal University, Chengdu 610068, P. R. China

\*E-mail: fengc@sicnu.edu.cn (C. F.); xiangsk@sicnu.edu.cn (S.-K. X.)

### Table of Contents

|                                                       |     |
|-------------------------------------------------------|-----|
| Screening of 2-pyridone ligands                       | S2  |
| General remarks                                       | S2  |
| Synthesis of compounds <b>1</b> and <b>2</b>          | S3  |
| General procedure for synthesis of compounds <b>3</b> | S3  |
| Synthesis of compound <b>4</b>                        | S13 |
| General procedure for synthesis of compounds <b>5</b> | S14 |
| References                                            | S15 |
| NMR spectra of compounds                              | S17 |

## Screening of 2-pyridone ligands

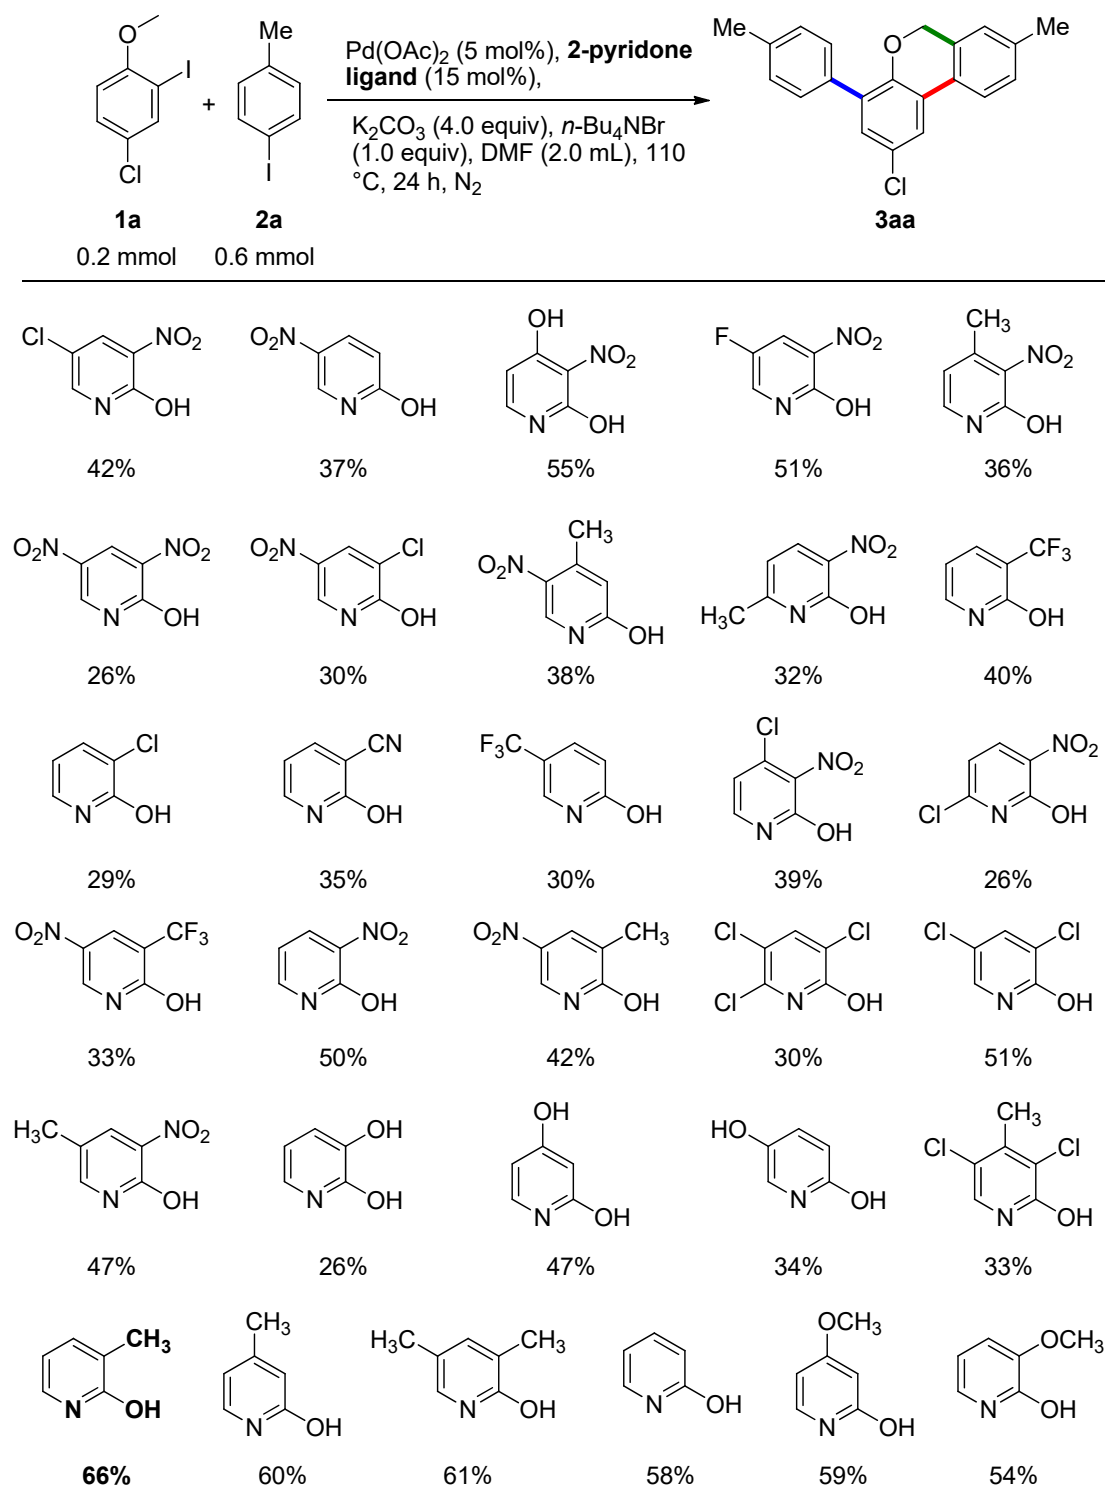

Scheme SI-1 Screening of 2-pyridone ligands

## General remarks

All of the manipulations were conducted with a Schlenk tube. <sup>1</sup>H NMR spectra were recorded on Varian 400 MHz or Bruker 600 MHz spectrometers. Chemical shifts

(in parts per million (ppm)) were referenced to tetramethylsilane ( $\delta = 0$  ppm) as an internal standard in  $\text{CDCl}_3$ .  $^{13}\text{C}\{^1\text{H}\}$  NMR spectra were obtained by the same NMR spectrometers and were calibrated with  $\text{CDCl}_3$  ( $\delta = 77.00$  ppm). High-resolution mass spectra (HRMS) were obtained using a quadrupole time-of-flight (Q-TOF) mass spectrometer with an electrospray ionization (ESI) resource, or a quadrupole fourier-transform (Q-FT) mass spectrometer with an electrospray ionization (ESI) resource or a matrix-assisted laser desorption/ionization (MALDI) resource. Melting points were determined with a melting point apparatus. Unless otherwise noted, other materials obtained from commercial suppliers were used without further purification.

## Synthesis of compounds 1 and 2

Compounds **1a~1m**, **2a~2m**, and **2k-D** were obtained from commercial suppliers. The compound **1i-D** was synthesized from 2-iodophenol and iodomethane- $d_3$  according to literature method.<sup>1</sup> Compound **1i-D** is known, and the data are consistent with the literature.<sup>2</sup>

## General procedure for synthesis of compounds 3

$\text{Pd}(\text{OAc})_2$  (2.2 mg, 0.01 mmol), 3-methylpyridin-2-ol (3.3 mg, 0.03 mmol),  $\text{K}_2\text{CO}_3$  (138.2 mg, 1.0 mmol), *n*-Bu<sub>4</sub>NBr (64.5 mg, 0.2 mmol), 2-iodoanisole derivatives **1** (0.2 mmol) and iodobenzene derivatives **2** (0.6 mmol) were placed into a 25 mL Schlenk tube equipped with a magnetic stir bar. To this mixture was added DMF (2.0 mL) with an injection syringe under nitrogen atmosphere. The reaction mixture was stirred for 24 h at the appointed temperature in an oil bath. Then the solution was cooled to room temperature, quenched by the addition of 30 mL water, and extracted with dichloromethane ( $3 \times 20$  mL). The combined organic layer was washed with brine ( $3 \times 30$  mL), dried over anhydrous  $\text{MgSO}_4$ , and concentrated in vacuum. The residue was purified by column chromatography on silica gel to afford the products **3**.

### 2-Chloro-8-methyl-4-(*p*-tolyl)-6*H*-benzo[*c*]chromene (3aa)

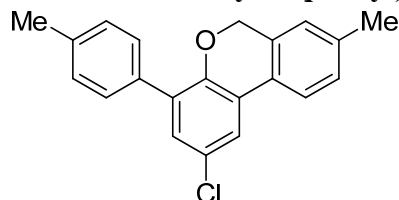

Purification by column chromatography (petroleum ether/ $\text{CH}_2\text{Cl}_2$ , 30:1 v/v) afforded **3aa**. White solid, 41.7 mg, 65% yield; mp 104.9–105.2 °C; IR (KBr,  $\text{cm}^{-1}$ )  $\nu_{\text{max}}$  2913, 2848, 1458, 1390, 1205, 1031, 820;  $^1\text{H}$  NMR (600 MHz,  $\text{CDCl}_3$ , ppm)  $\delta$  7.62 (d,  $J = 2.4$  Hz, 1H), 7.56 (d,  $J = 7.8$  Hz, 1H), 7.43–7.41 (m, 2H), 7.25–7.22 (m, 3H), 7.19 (d,  $J = 7.8$  Hz, 1H), 6.96 (s, 1H), 5.02 (s, 2H), 2.40 (s, 3H), 2.37 (s, 3H);  $^{13}\text{C}\{^1\text{H}\}$  NMR (150 MHz,  $\text{CDCl}_3$ , ppm)  $\delta$  150.0, 138.4, 137.4, 133.9, 132.4, 131.4, 129.4, 129.3, 129.2, 128.9, 126.9, 126.7, 125.2, 125.1, 122.4, 121.9, 68.5, 21.3, 21.2; HRMS (ESI)  $m/z$ :  $[\text{M}+\text{Na}]^+$  calcd for  $\text{C}_{21}\text{H}_{17}\text{ClNaO}$  343.0866, Found 343.0863.

### 2-Fluoro-8-methyl-4-(*p*-tolyl)-6*H*-benzo[*c*]chromene (3ba)

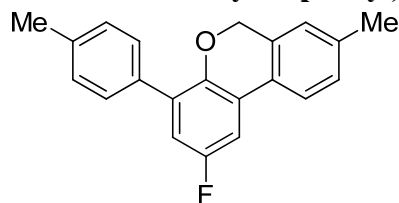

Purification by column chromatography (petroleum ether/CH<sub>2</sub>Cl<sub>2</sub>, 30:1 v/v) afforded **3ba**. White solid, 30.4 mg, 50% yield; mp 126.1–126.3 °C; IR (KBr, cm<sup>-1</sup>)  $\nu_{max}$  2917, 2854, 1462, 1391, 1029, 823; <sup>1</sup>H NMR (600 MHz, CDCl<sub>3</sub>, ppm)  $\delta$  7.54 (d,  $J$  = 8.4 Hz, 1H), 7.44 (d,  $J$  = 8.4 Hz, 2H), 7.36 (dd,  $J_1$  = 9.0 Hz,  $J_2$  = 3.0 Hz, 1H), 7.24 (d,  $J$  = 7.8 Hz, 2H), 7.20 (d,  $J$  = 7.8 Hz, 1H), 7.00–6.97 (m, 2H), 5.02 (s, 2H), 2.40 (s, 3H), 2.38 (s, 3H); <sup>13</sup>C{<sup>1</sup>H} NMR (150 MHz, CDCl<sub>3</sub>, ppm)  $\delta$  157.8 (d,  $J$  = 238.05 Hz), 147.5, 138.4, 137.4, 134.1, 132.2 (d,  $J$  = 8.7 Hz), 131.7, 129.2, 129.2, 128.9, 127.1, 125.2, 124.9 (d,  $J$  = 8.55 Hz), 122.5, 116.2 (d,  $J$  = 23.7 Hz), 108.3 (d,  $J$  = 23.85 Hz), 68.5, 21.3, 21.2; HRMS (ESI)  $m/z$ : [M+Na]<sup>+</sup> calcd for C<sub>21</sub>H<sub>17</sub>FNao 327.1161, Found 327.1158.

### Methyl 8-methyl-4-(*p*-tolyl)-6*H*-benzo[*c*]chromene-2-carboxylate (3ca)

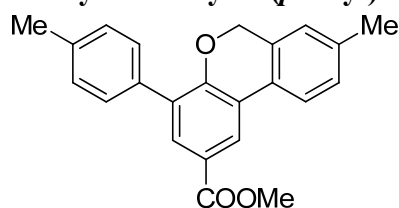

Purification by column chromatography (petroleum ether/ethyl acetate, 30:1 v/v) afforded **3ca**. White solid, 40.0 mg, 58% yield; mp 115.8–116.0 °C; IR (KBr, cm<sup>-1</sup>)  $\nu_{max}$  3020, 2951, 2849, 1710, 1242, 1019; <sup>1</sup>H NMR (600 MHz, CDCl<sub>3</sub>, ppm)  $\delta$  8.39 (d,  $J$  = 1.8 Hz, 1H), 7.96 (d,  $J$  = 2.4 Hz, 1H), 7.71 (d,  $J$  = 7.8 Hz, 1H), 7.46 (d,  $J$  = 8.4 Hz, 2H), 7.24 (d,  $J$  = 7.8 Hz, 2H), 7.21 (d,  $J$  = 8.4 Hz, 1H), 6.96 (s, 1H), 5.09 (s, 2H), 3.92 (s, 3H), 2.40 (s, 3H), 2.37 (s, 3H); <sup>13</sup>C{<sup>1</sup>H} NMR (150 MHz, CDCl<sub>3</sub>, ppm)  $\delta$  166.9, 155.2, 138.2, 137.2, 134.2, 131.5, 130.8, 130.8, 129.4, 129.2, 128.8, 126.8, 125.1, 123.8, 123.6, 123.3, 122.5, 68.6, 52.0, 21.2; HRMS (ESI)  $m/z$ : [M+H]<sup>+</sup> calcd for C<sub>23</sub>H<sub>21</sub>O<sub>3</sub> 345.1491, Found 345.1475.

### 8-Methyl-2-nitro-4-(*p*-tolyl)-6*H*-benzo[*c*]chromene (3da)

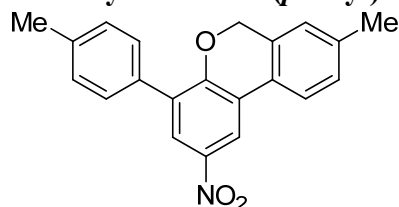

Purification by column chromatography (petroleum ether/ethyl acetate, 30:1 v/v) afforded **3da**. White solid, 35.8 mg, 54% yield; mp 184.7–184.8 °C; IR (KBr, cm<sup>-1</sup>)  $\nu_{max}$  2915, 2863, 1515, 1337, 1239, 1010, 812; <sup>1</sup>H NMR (600 MHz, CDCl<sub>3</sub>, ppm)  $\delta$  8.57 (d,  $J$  = 2.4 Hz, 1H), 8.16 (d,  $J$  = 3.0 Hz, 1H), 7.70 (d,  $J$  = 7.8 Hz, 1H), 7.46 (d,  $J$

= 7.8 Hz, 2H), 7.29-7.25 (m, 3H), 7.00 (s, 1H), 5.17 (s, 2H), 2.42 (s, 3H), 2.40 (s, 3H);  $^{13}\text{C}\{^1\text{H}\}$  NMR (150 MHz,  $\text{CDCl}_3$ , ppm)  $\delta$  156.5, 142.4, 139.4, 138.1, 132.9, 131.7, 130.5, 129.8, 129.2, 129.1, 125.7, 125.3, 125.1, 123.9, 122.7, 117.6, 68.9, 21.3, 21.3; HRMS (ESI)  $m/z$ :  $[\text{M}+\text{H}]^+$  calcd for  $\text{C}_{21}\text{H}_{18}\text{NO}_3$  332.1287, Found 332.1271.

### 8-Methyl-4-(*p*-tolyl)-2-(trifluoromethyl)-6*H*-benzo[*c*]chromene (3ea)

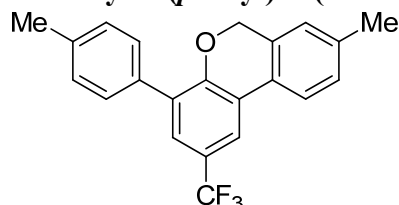

Purification by column chromatography (petroleum ether/ $\text{CH}_2\text{Cl}_2$ , 30:1 v/v) afforded **3ea**. White solid, 38.3 mg, 54% yield; mp 106.6–106.8 °C; IR (KBr,  $\text{cm}^{-1}$ )  $\nu_{\text{max}}$  2919, 2863, 1365, 1276, 1098, 817;  $^1\text{H}$  NMR (600 MHz,  $\text{CDCl}_3$ , ppm)  $\delta$  7.92 (s, 1H), 7.65 (d,  $J = 7.8$  Hz, 1H), 7.51 (s, 1H), 7.45 (d,  $J = 8.4$  Hz, 2H), 7.26 (d,  $J = 7.8$  Hz, 2H), 7.23 (d,  $J = 7.8$  Hz, 1H), 6.99 (s, 1H), 5.10 (s, 2H), 2.41 (s, 3H), 2.39 (s, 3H);  $^{13}\text{C}\{^1\text{H}\}$  NMR (150 MHz,  $\text{CDCl}_3$ , ppm)  $\delta$  153.8, 138.7, 137.6, 133.8, 131.4, 131.1, 129.5, 129.2, 129.0, 126.8 (q,  $J = 3.3$  Hz), 126.4, 125.3, 124.4 (q,  $J = 269.7$  Hz), 124.0 (q,  $J = 32.4$  Hz), 123.9, 122.5, 119.2 (q,  $J = 3.3$  Hz), 68.6, 21.3, 21.2; HRMS (ESI)  $m/z$ :  $[\text{M}+\text{Na}]^+$  calcd for  $\text{C}_{22}\text{H}_{17}\text{F}_3\text{NaO}$  377.1129, Found 377.1128.

### 8-Methyl-4-(*p*-tolyl)-6*H*-benzo[*c*]chromene-2-carbaldehyde (3fa)

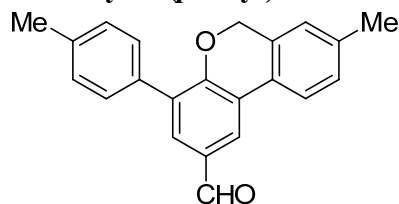

Purification by column chromatography (petroleum ether/ethyl acetate, 15:1 v/v) afforded **3fa**. Yellow solid, 44.0 mg, 70% yield; mp 109.8–110.1 °C; IR (KBr,  $\text{cm}^{-1}$ )  $\nu_{\text{max}}$  2920, 2850, 1693, 1592, 1164, 1019, 822;  $^1\text{H}$  NMR (600 MHz,  $\text{CDCl}_3$ , ppm)  $\delta$  9.95 (s, 1H), 8.19 (s, 1H), 7.76 (s, 1H), 7.68 (d,  $J = 8.4$  Hz, 1H), 7.45 (d,  $J = 7.8$  Hz, 2H), 7.25 (d,  $J = 7.8$  Hz, 2H), 7.21 (d,  $J = 7.8$  Hz, 1H), 6.95 (s, 1H), 5.11 (s, 2H), 2.40 (s, 3H), 2.37 (s, 3H);  $^{13}\text{C}\{^1\text{H}\}$  NMR (150 MHz,  $\text{CDCl}_3$ , ppm)  $\delta$  191.1, 156.6, 138.6, 137.5, 133.7, 132.1, 131.5, 130.6, 130.5, 129.5, 129.2, 128.9, 126.3, 125.1, 123.9, 123.4, 122.5, 68.7, 21.2; HRMS (ESI)  $m/z$ :  $[\text{M}+\text{H}]^+$  calcd for  $\text{C}_{22}\text{H}_{19}\text{O}_2$  315.1385, Found 315.1372.

### 2,8-Dimethyl-4-(*p*-tolyl)-6*H*-benzo[*c*]chromene (3ga)

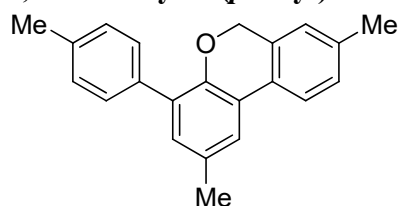

Purification by column chromatography (petroleum ether/CH<sub>2</sub>Cl<sub>2</sub>, 30:1 v/v) afforded **3ga**. White solid, 21.6 mg, 36% yield; mp 102.8–102.9 °C; IR (KBr, cm<sup>-1</sup>)  $\nu_{max}$  2917, 2855, 1431, 1212, 1032, 820; <sup>1</sup>H NMR (600 MHz, CDCl<sub>3</sub>, ppm)  $\delta$  7.61 (d,  $J$  = 7.8 Hz, 1H), 7.50 (s, 1H), 7.45 (d,  $J$  = 7.8 Hz, 2H), 7.23 (d,  $J$  = 6.6 Hz, 2H), 7.18 (d,  $J$  = 7.8 Hz, 1H), 7.08 (s, 1H), 6.95 (s, 1H), 5.00 (s, 2H), 2.39 (s, 3H), 2.39 (s, 3H), 2.36 (s, 3H); <sup>13</sup>C{<sup>1</sup>H} NMR (150 MHz, CDCl<sub>3</sub>, ppm)  $\delta$  149.4, 137.5, 136.7, 135.2, 131.7, 130.9, 130.8, 130.5, 129.3, 129.0, 128.7, 127.8, 125.2, 123.4, 122.6, 122.2, 68.5, 21.2, 20.9; HRMS (ESI)  $m/z$ : [M+H]<sup>+</sup> calcd for C<sub>22</sub>H<sub>21</sub>O 301.1592, Found 301.1579.

### 2-Methoxy-8-methyl-4-(*p*-tolyl)-6*H*-benzo[*c*]chromene (3ha)

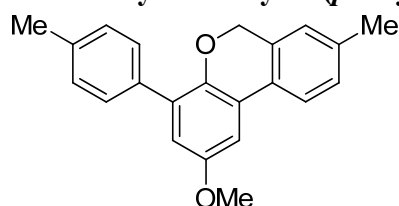

Purification by column chromatography (petroleum ether/CH<sub>2</sub>Cl<sub>2</sub>, 3:1 v/v) afforded **3ha**. Yellow solid, 25.3 mg, 40% yield; mp 93.5–93.8 °C; IR (KBr, cm<sup>-1</sup>)  $\nu_{max}$  2918, 2847, 1606, 1510, 1430, 1201, 1058, 1016, 822; <sup>1</sup>H NMR (600 MHz, CDCl<sub>3</sub>, ppm)  $\delta$  7.58 (d,  $J$  = 7.8 Hz, 1H), 7.46 (d,  $J$  = 7.8 Hz, 2H), 7.25–7.22 (m, 3H), 7.18 (d,  $J$  = 7.8 Hz, 1H), 6.96 (s, 1H), 6.84 (d,  $J$  = 3.0 Hz, 1H), 4.98 (s, 2H), 3.85 (s, 3H), 2.39 (s, 3H), 2.36 (s, 3H); <sup>13</sup>C{<sup>1</sup>H} NMR (150 MHz, CDCl<sub>3</sub>, ppm)  $\delta$  154.3, 145.6, 137.8, 137.0, 135.0, 132.0, 131.6, 129.2, 129.0, 128.8, 127.7, 125.2, 124.5, 122.3, 115.5, 107.4, 68.5, 55.8, 21.2, 21.2; HRMS (ESI)  $m/z$ : [M+H]<sup>+</sup> calcd for C<sub>22</sub>H<sub>21</sub>O<sub>2</sub> 317.1542, Found 317.1526.

### 8-Methyl-4-(*p*-tolyl)-6*H*-benzo[*c*]chromene (3ia)

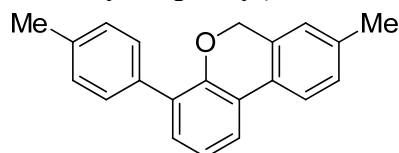

Purification by column chromatography (petroleum ether/CH<sub>2</sub>Cl<sub>2</sub>, 30:1 v/v) afforded **3ia**. White solid, 34.9 mg, 61% yield; mp 106.8–107.0 °C; IR (KBr, cm<sup>-1</sup>)  $\nu_{max}$  2814, 2855, 1457, 1204, 1023, 784; <sup>1</sup>H NMR (600 MHz, CDCl<sub>3</sub>, ppm)  $\delta$  7.69 (dd,  $J_1$  = 7.8 Hz,  $J_2$  = 1.2 Hz, 1H), 7.62 (d,  $J$  = 7.8 Hz, 1H), 7.46 (d,  $J$  = 8.4 Hz, 2H), 7.27 (dd,  $J_1$  = 7.8 Hz,  $J_2$  = 1.2 Hz, 1H), 7.24 (d,  $J$  = 8.4 Hz, 2H), 7.19 (d,  $J$  = 7.8 Hz, 1H), 7.09 (t,  $J$  = 7.8 Hz, 1H), 6.97 (s, 1H), 5.04 (s, 2H), 2.40 (s, 3H), 2.37 (s, 3H); <sup>13</sup>C{<sup>1</sup>H} NMR (150 MHz, CDCl<sub>3</sub>, ppm)  $\delta$  151.5, 137.6, 136.8, 135.1, 131.6, 130.8, 130.2, 129.3, 129.1, 128.8, 127.7, 125.2, 123.7, 122.3, 122.2, 121.8, 68.5, 21.2, 21.2; HRMS (ESI)  $m/z$ : [M+H]<sup>+</sup> calcd for C<sub>21</sub>H<sub>19</sub>O 287.1436, Found 287.1421.

### 6,6-Dideuterium-8-methyl-4-(*p*-tolyl)-6*H*-benzo[*c*]chromene (3ia-D)

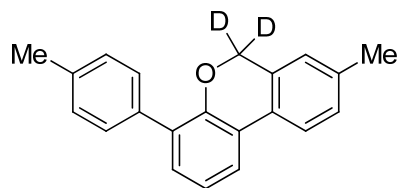

Purification by column chromatography (petroleum ether/CH<sub>2</sub>Cl<sub>2</sub>, 30:1 v/v) afforded **3ia-D**. White solid, 26.5 mg, 46% yield; mp 103.6–103.8 °C; IR (KBr, cm<sup>-1</sup>)  $\nu_{max}$  2916, 2854, 1442, 1391, 1234, 1074, 782; <sup>1</sup>H NMR (600 MHz, CDCl<sub>3</sub>, ppm)  $\delta$  7.70 (dd,  $J_1 = 7.8$  Hz,  $J_2 = 1.2$  Hz, 1H), 7.63 (d,  $J = 7.8$  Hz, 1H), 7.46 (d,  $J = 8.4$  Hz, 2H), 7.27 (dd,  $J_1 = 7.8$  Hz,  $J_2 = 1.2$  Hz, 1H), 7.24 (d,  $J = 8.4$  Hz, 2H), 7.20 (d,  $J = 7.2$  Hz, 1H), 7.10 (t,  $J = 7.8$  Hz, 1H), 6.97 (s, 1H), 2.40 (s, 3H), 2.38 (s, 3H); <sup>13</sup>C{<sup>1</sup>H} NMR (150 MHz, CDCl<sub>3</sub>, ppm)  $\delta$  151.5, 137.6, 136.8, 135.1, 131.4, 130.8, 130.2, 129.3, 129.1, 128.8, 127.7, 125.2, 123.6, 122.3, 122.2, 121.8, 21.2; HRMS (ESI) m/z: [M+Na]<sup>+</sup> calcd for C<sub>21</sub>H<sub>16</sub>D<sub>2</sub>NaO 311.1381, Found 311.1380.

#### 4-Fluoro-8-methyl-6H-benzo[c]chromene (3ja)

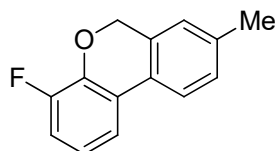

Purification by column chromatography (petroleum ether/CH<sub>2</sub>Cl<sub>2</sub>, 30:1 v/v) afforded **3ja**. White solid, 21.4 mg, 50% yield; mp 68.5–68.6 °C; IR (KBr, cm<sup>-1</sup>)  $\nu_{max}$  2909, 2860, 1478, 1252, 1009, 785; <sup>1</sup>H NMR (600 MHz, CDCl<sub>3</sub>, ppm)  $\delta$  7.56 (d,  $J = 7.8$  Hz, 1H), 7.46 (d,  $J = 7.8$  Hz, 1H), 7.18 (d,  $J = 7.8$  Hz, 1H), 7.03-6.98 (m, 1H), 6.98 (s, 1H), 6.97-6.92 (m, 1H), 5.15 (s, 2H), 2.37 (s, 3H); <sup>13</sup>C{<sup>1</sup>H} NMR (150 MHz, CDCl<sub>3</sub>, ppm)  $\delta$  152.0 (d,  $J = 243.6$  Hz), 142.2 (d,  $J = 11.85$  Hz), 138.3, 131.1, 129.3, 126.5 (d,  $J = 3.3$  Hz), 125.5 (d,  $J = 1.5$  Hz), 125.4, 122.3, 121.5 (d,  $J = 7.5$  Hz), 118.1 (d,  $J = 3.15$  Hz), 115.5 (d,  $J = 17.55$  Hz), 68.7, 21.2; HRMS (ESI) m/z: [M+Na]<sup>+</sup> calcd for C<sub>14</sub>H<sub>11</sub>FNaO 237.0692, Found 237.0689.

#### 4-Chloro-8-methyl-6H-benzo[c]chromene (3ka)

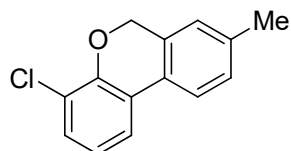

Purification by column chromatography (petroleum ether/CH<sub>2</sub>Cl<sub>2</sub>, 30:1 v/v) afforded **3ka**. White solid, 24.0 mg, 52% yield; mp 62.5–62.6 °C; IR (KBr, cm<sup>-1</sup>)  $\nu_{max}$  2915, 2859, 1431, 1405, 1225, 1028, 821; <sup>1</sup>H NMR (600 MHz, CDCl<sub>3</sub>, ppm)  $\delta$  7.59 (dd,  $J_1 = 7.8$  Hz,  $J_2 = 1.8$  Hz, 1H), 7.56 (d,  $J = 7.8$  Hz, 1H), 7.26 (dd,  $J_1 = 7.8$  Hz,  $J_2 = 1.8$  Hz, 1H), 7.18 (d,  $J = 7.8$  Hz, 1H), 6.98 (s, 1H), 6.96 (t,  $J = 7.8$  Hz, 1H), 5.18 (s, 2H), 2.37 (s, 3H); <sup>13</sup>C{<sup>1</sup>H} NMR (150 MHz, CDCl<sub>3</sub>, ppm)  $\delta$  150.2, 138.3, 131.0, 129.3, 126.6, 125.3, 124.6, 122.4, 122.3, 122.1, 121.4, 68.9, 21.2; HRMS (ESI) m/z: [M+Na]<sup>+</sup> calcd for C<sub>14</sub>H<sub>11</sub>ClNaO 253.0396, Found 253.0393.

#### 4-Methoxy-8-methyl-6*H*-benzo[*c*]chromene (31a)

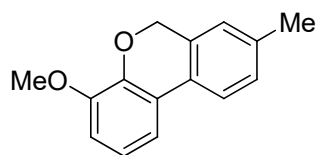

Purification by column chromatography (petroleum ether/CH<sub>2</sub>Cl<sub>2</sub>, 3:1 v/v) afforded **31a**. White solid, 14.9 mg, 33% yield; mp 60.9–61.2 °C; IR (KBr, cm<sup>-1</sup>)  $\nu_{max}$  2919, 1564, 1474, 1250, 1023; <sup>1</sup>H NMR (600 MHz, CDCl<sub>3</sub>, ppm)  $\delta$  7.56 (d,  $J$  = 7.8 Hz, 1H), 7.32 (dd,  $J_1$  = 7.8 Hz,  $J_2$  = 1.2 Hz, 1H), 7.16 (d,  $J$  = 7.8 Hz, 1H), 6.98 (t,  $J$  = 7.8 Hz, 1H), 6.97 (s, 1H), 6.84 (dd,  $J_1$  = 7.8 Hz,  $J_2$  = 1.2 Hz, 1H), 5.15 (s, 2H), 3.90 (s, 3H), 2.36 (s, 3H); <sup>13</sup>C{<sup>1</sup>H} NMR (150 MHz, CDCl<sub>3</sub>, ppm)  $\delta$  148.9, 143.5, 137.7, 131.2, 129.0, 127.2, 125.2, 123.8, 122.2, 121.5, 115.1, 111.1, 68.7, 56.0, 21.2; HRMS (ESI)  $m/z$ : [M+Na]<sup>+</sup> calcd for C<sub>15</sub>H<sub>14</sub>NaO<sub>2</sub> 249.0891, Found 249.0889.

#### 4-Methoxy-8-methyl-6*H*-benzo[*c*]chromene-2-carbaldehyde (3ma)

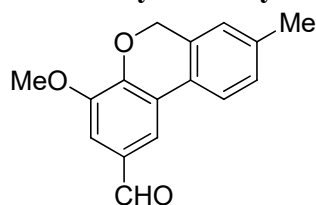

Purification by column chromatography (petroleum ether/ethyl acetate, 10:1 v/v) afforded **3ma**. White solid, 24.4 mg, 48% yield; mp 148.7–148.9 °C; IR (KBr, cm<sup>-1</sup>)  $\nu_{max}$  2921, 1690, 1244, 1145; <sup>1</sup>H NMR (600 MHz, CDCl<sub>3</sub>, ppm)  $\delta$  9.94 (s, 1H), 7.86 (d,  $J$  = 1.8 Hz, 1H), 7.65 (d,  $J$  = 7.8 Hz, 1H), 7.37 (d,  $J$  = 1.8 Hz, 1H), 7.23 (d,  $J$  = 7.8 Hz, 1H), 7.01 (s, 1H), 5.27 (s, 2H), 3.98 (s, 3H), 2.39 (s, 3H); <sup>13</sup>C{<sup>1</sup>H} NMR (150 MHz, CDCl<sub>3</sub>, ppm)  $\delta$  191.1, 149.7, 149.0, 138.8, 130.5, 130.3, 129.5, 125.9, 125.3, 123.5, 122.3, 120.0, 109.3, 69.1, 56.2, 21.3; HRMS (ESI)  $m/z$ : [M+H]<sup>+</sup> calcd for C<sub>16</sub>H<sub>15</sub>O<sub>3</sub> 255.1021, Found 255.1011.

#### 8-(*Tert*-butyl)-4-(4-(*tert*-butyl)phenyl)-2-chloro-6*H*-benzo[*c*]chromene (3ab)

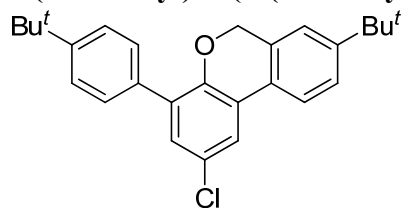

Purification by column chromatography (petroleum ether/CH<sub>2</sub>Cl<sub>2</sub>, 30:1 v/v) afforded **3ab**. White solid, 48.6 mg, 60% yield; mp 155.1–155.3 °C; IR (KBr, cm<sup>-1</sup>)  $\nu_{max}$  2961, 2861, 1461, 1224, 1015, 824; <sup>1</sup>H NMR (600 MHz, CDCl<sub>3</sub>, ppm)  $\delta$  7.64 (d,  $J$  = 2.4 Hz, 1H), 7.61 (d,  $J$  = 8.4 Hz, 1H), 7.49 (d,  $J$  = 8.4 Hz, 2H), 7.45 (d,  $J$  = 9.0 Hz, 2H), 7.43 (dd,  $J_1$  = 8.4 Hz,  $J_2$  = 2.4 Hz, 1H), 7.25 (d,  $J$  = 2.4 Hz, 1H), 7.17 (d,  $J$  = 2.4 Hz, 1H), 5.07 (s, 2H), 1.37 (s, 9H), 1.35 (s, 9H); <sup>13</sup>C{<sup>1</sup>H} NMR (150 MHz, CDCl<sub>3</sub>, ppm)  $\delta$  151.7, 150.5, 150.2, 133.8, 132.2, 131.1, 129.6, 128.9, 126.9, 126.7, 125.6, 125.1, 125.1, 122.3, 121.9, 121.6, 68.9, 34.7, 34.6, 31.3, 31.3; HRMS (ESI)  $m/z$ : [M+H]<sup>+</sup> calcd for C<sub>27</sub>H<sub>30</sub>ClO 405.1985, Found 405.1975.



**2-Chloro-8-isopropyl-4-(4-isopropylphenyl)-6H-benzo[c]chromene (3ac)**

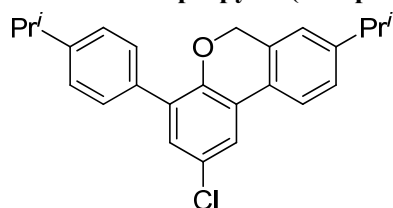

Purification by column chromatography (petroleum ether/CH<sub>2</sub>Cl<sub>2</sub>, 30:1 v/v) afforded **3ac**. White solid, 42.2 mg, 56% yield; mp 47.9–48.2 °C; IR (KBr, cm<sup>-1</sup>)  $\nu_{max}$  2959, 2925, 1642, 1459, 1022, 830; <sup>1</sup>H NMR (600 MHz, CDCl<sub>3</sub>, ppm)  $\delta$  7.63 (d, *J* = 1.2 Hz, 1H), 7.59 (d, *J* = 8.4 Hz, 1H), 7.47 (d, *J* = 7.2 Hz, 2H), 7.29 (d, *J* = 7.8 Hz, 2H), 7.27-7.23 (m, 2H), 7.01 (s, 1H), 5.05 (s, 2H), 2.99-2.88 (m, 2H), 1.29 (d, *J* = 7.2 Hz, 6H), 1.27 (d, *J* = 7.2 Hz, 6H); <sup>13</sup>C{<sup>1</sup>H} NMR (150 MHz, CDCl<sub>3</sub>, ppm)  $\delta$  150.1, 149.4, 148.2, 134.2, 132.4, 131.4, 129.6, 129.2, 127.1, 126.9, 126.7, 126.3, 125.2, 122.6, 122.5, 121.9, 68.7, 34.0, 33.9, 24.0, 23.9; HRMS (ESI) *m/z*: [M+Na]<sup>+</sup> calcd for C<sub>25</sub>H<sub>25</sub>ClNaO 399.1492, Found 399.1491.

**2-Chloro-4-(3,4-dimethylphenyl)-8,9-dimethyl-6H-benzo[c]chromene (3ad)**

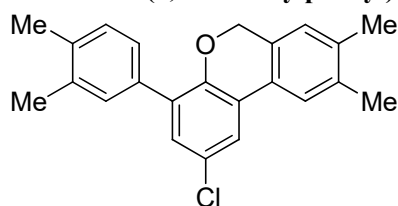

Purification by column chromatography (petroleum ether/CH<sub>2</sub>Cl<sub>2</sub>, 30:1 v/v) afforded **3ad**. White solid, 36.3 mg, 52% yield; mp 181.3–181.6 °C; IR (KBr, cm<sup>-1</sup>)  $\nu_{max}$  2914, 2854, 1439, 1376, 1212, 1019, 867; <sup>1</sup>H NMR (600 MHz, CDCl<sub>3</sub>, ppm)  $\delta$  7.62 (d, *J* = 2.4 Hz, 1H), 7.44 (s, 1H), 7.29 (s, 1H), 7.27 (d, *J* = 7.8 Hz, 1H), 7.21 (d, *J* = 2.4 Hz, 1H), 7.18 (d, *J* = 7.8 Hz, 1H), 6.91 (s, 1H), 5.00 (s, 2H), 2.32 (s, 3H), 2.31 (s, 3H), 2.30 (s, 3H), 2.28 (s, 3H); <sup>13</sup>C{<sup>1</sup>H} NMR (150 MHz, CDCl<sub>3</sub>, ppm)  $\delta$  150.1, 137.0, 136.8, 136.3, 136.1, 134.4, 132.5, 130.4, 129.4, 129.3, 129.0, 126.9, 126.8, 125.8, 125.1, 123.6, 121.7, 68.3, 19.9, 19.8, 19.6, 19.5; HRMS (ESI) *m/z*: [M+H]<sup>+</sup> calcd for C<sub>23</sub>H<sub>21</sub>ClO 348.1281, Found 348.1284.

**2-Chloro-4-(3,5-dimethylphenyl)-7,9-dimethyl-6H-benzo[c]chromene (3ae)**

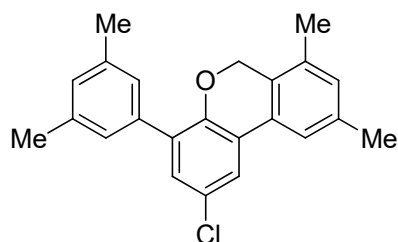

Purification by column chromatography (petroleum ether/CH<sub>2</sub>Cl<sub>2</sub>, 30:1 v/v) afforded **3ae**. White solid, 41.9 mg, 60% yield; mp 163.6–163.9 °C; IR (KBr, cm<sup>-1</sup>)  $\nu_{max}$  2911, 2851, 1603, 1398, 1192, 1010, 852, 675; <sup>1</sup>H NMR (600 MHz, CDCl<sub>3</sub>, ppm)  $\delta$  7.63 (d, *J* = 2.4 Hz, 1H), 7.34 (s, 1H), 7.22 (d, *J* = 2.4 Hz, 1H), 7.13 (s, 2H), 7.00 (s,

1H), 6.97 (s, 1H), 5.07 (s, 2H), 2.36 (s, 9H), 2.23 (s, 3H);  $^{13}\text{C}\{^1\text{H}\}$  NMR (150 MHz,  $\text{CDCl}_3$ , ppm)  $\delta$  150.1, 137.6, 137.5, 136.7, 133.0, 132.6, 131.0, 129.7, 129.3, 129.1, 127.2, 127.1, 126.7, 125.3, 122.3, 120.8, 65.6, 21.4, 21.3, 18.2; HRMS (ESI)  $m/z$ :  $[\text{M}+\text{Na}]^+$  calcd for  $\text{C}_{23}\text{H}_{21}\text{ClNaO}$  371.1179, Found 371.1175.

### 2-Chloro-8-methoxy-4-(4-methoxyphenyl)-6H-benzo[c]chromene (3af)

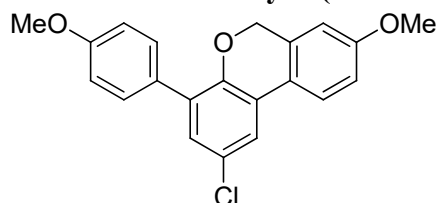

Purification by column chromatography (petroleum ether/ $\text{CH}_2\text{Cl}_2$ , 10:1 v/v) afforded **3af**. Tawny solid, 38.8 mg, 55% yield; mp 68.7–68.7 °C; IR (KBr,  $\text{cm}^{-1}$ )  $\nu_{\text{max}}$  2923, 2834, 1611, 1510, 1245, 1029, 825;  $^1\text{H}$  NMR (600 MHz,  $\text{CDCl}_3$ , ppm)  $\delta$  7.61 (d,  $J = 8.4$  Hz, 1H), 7.57 (d,  $J = 2.4$  Hz, 1H), 7.48 (d,  $J = 8.4$  Hz, 2H), 7.19 (d,  $J = 3.0$  Hz, 1H), 6.97 (d,  $J = 9.0$  Hz, 2H), 6.94 (dd,  $J_1 = 8.4$  Hz,  $J_2 = 2.4$  Hz, 1H), 6.69 (d,  $J = 2.4$  Hz, 1H), 5.04 (s, 2H), 3.85 (s, 3H), 3.85 (s, 3H);  $^{13}\text{C}\{^1\text{H}\}$  NMR (150 MHz,  $\text{CDCl}_3$ , ppm)  $\delta$  159.9, 159.1, 149.4, 133.1, 132.0, 129.2, 128.8, 127.0, 125.1, 124.0, 122.2, 121.3, 114.1, 113.6, 110.0, 68.5, 55.4, 55.3; HRMS (ESI)  $m/z$ :  $[\text{M}+\text{Na}]^+$  calcd for  $\text{C}_{21}\text{H}_{17}\text{ClNaO}_3$  375.0764, Found 375.0760.

### 2-Chloro-4-(3,4-dimethoxyphenyl)-8,9-dimethoxy-6H-benzo[c]chromene (3ag)

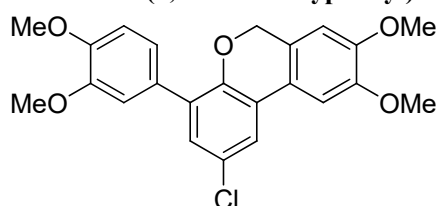

Purification by column chromatography (petroleum ether/ethyl acetate, 5:1 v/v) afforded **3ag**. White solid, 38.8 mg, 47% yield; mp 186.1–186.2 °C; IR (KBr,  $\text{cm}^{-1}$ )  $\nu_{\text{max}}$  2942, 2841, 1516, 1272, 1034, 857;  $^1\text{H}$  NMR (600 MHz,  $\text{CDCl}_3$ , ppm)  $\delta$  7.55 (d,  $J = 2.4$  Hz, 1H), 7.22 (d,  $J = 2.4$  Hz, 1H), 7.16 (s, 1H), 7.10 (dd,  $J_1 = 7.8$  Hz,  $J_2 = 2.4$  Hz, 1H), 7.08 (d,  $J = 1.8$  Hz, 1H), 6.94 (d,  $J = 7.8$  Hz, 1H), 6.67 (s, 1H), 5.03 (s, 2H), 3.99 (s, 3H), 3.93 (s, 3H), 3.92 (s, 6H);  $^{13}\text{C}\{^1\text{H}\}$  NMR (150 MHz,  $\text{CDCl}_3$ , ppm)  $\delta$  149.5, 149.5, 149.4, 148.6, 148.5, 132.1, 129.4, 128.9, 126.9, 125.2, 124.1, 122.0, 121.7, 121.2, 112.7, 110.8, 107.7, 105.8, 68.2, 56.2, 56.1, 55.9, 55.9; HRMS (ESI)  $m/z$ :  $[\text{M}+\text{H}]^+$  calcd for  $\text{C}_{23}\text{H}_{22}\text{ClO}_5$  413.1156, Found 413.1147.

### 2-Chloro-4-(3,5-dimethoxyphenyl)-7,9-dimethoxy-6H-benzo[c]chromene (3ah)

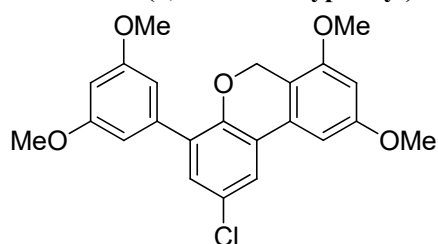

Purification by column chromatography (petroleum ether/CH<sub>2</sub>Cl<sub>2</sub>, 3:1 v/v) afforded **3ah**. White solid, 47.9 mg, 58% yield; mp 159.9–160.1 °C; IR (KBr, cm<sup>-1</sup>)  $\nu_{max}$  2936, 2834, 1607, 1400, 1198, 1147, 1058, 826, 692; <sup>1</sup>H NMR (600 MHz, CDCl<sub>3</sub>, ppm)  $\delta$  7.61 (d, *J* = 2.4 Hz, 1H), 7.27 (d, *J* = 2.4 Hz, 1H), 6.77 (d, *J* = 2.4 Hz, 1H), 6.68 (d, *J* = 2.4 Hz, 2H), 6.48 (t, *J* = 2.4 Hz, 1H), 6.46 (d, *J* = 2.4 Hz, 1H), 5.10 (s, 2H), 3.90 (s, 3H), 3.83 (s, 6H), 3.82 (s, 3H); <sup>13</sup>C{<sup>1</sup>H} NMR (150 MHz, CDCl<sub>3</sub>, ppm)  $\delta$  160.7, 160.4, 156.0, 150.5, 138.6, 132.3, 130.9, 129.9, 126.5, 125.0, 122.7, 112.8, 107.5, 99.9, 98.5, 63.1, 55.6, 55.5, 55.4; HRMS (ESI) *m/z*: [M+H]<sup>+</sup> calcd for C<sub>23</sub>H<sub>22</sub>ClO<sub>5</sub> 413.1156, Found 413.1142.

### 2-Chloro-8-methoxy-4-(4-methoxy-3-methylphenyl)-9-methyl-6*H*-benzo[*c*]chromene (3ai)

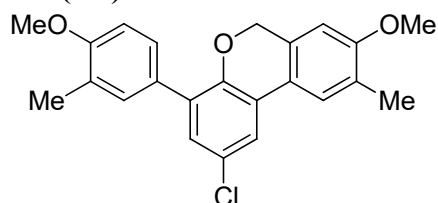

Purification by column chromatography (petroleum ether/CH<sub>2</sub>Cl<sub>2</sub>, 10:1 v/v) afforded **3ai**. White solid, 34.3 mg, 45% yield; mp 144.2–144.5 °C; IR (KBr, cm<sup>-1</sup>)  $\nu_{max}$  2925, 2843, 1508, 1251, 1033; <sup>1</sup>H NMR (600 MHz, CDCl<sub>3</sub>, ppm)  $\delta$  7.55 (d, *J* = 2.4 Hz, 1H), 7.45 (s, 1H), 7.34 (dd, *J* = 8.4 Hz, 2.4 Hz, 1H), 7.31 (d, *J* = 1.2 Hz, 1H), 7.17 (d, *J* = 3.0 Hz, 1H), 6.87 (d, *J* = 7.8 Hz, 1H), 6.58 (s, 1H), 5.02 (s, 2H), 3.86 (s, 3H), 3.85 (s, 3H), 2.27 (s, 3H), 2.27 (s, 3H); <sup>13</sup>C{<sup>1</sup>H} NMR (150 MHz, CDCl<sub>3</sub>, ppm)  $\delta$  158.1, 157.3, 149.4, 132.1, 131.6, 130.3, 128.8, 128.6, 127.8, 126.9, 126.8, 126.3, 125.2, 125.0, 121.5, 121.1, 109.5, 106.0, 68.5, 55.5, 55.3, 16.3, 16.3; HRMS (ESI) *m/z*: [M+Na]<sup>+</sup> calcd for C<sub>23</sub>H<sub>21</sub>ClNaO<sub>3</sub> 403.1077, Found 403.1075.

### 4-([1,1'-Biphenyl]-4-yl)-2-chloro-8-phenyl-6*H*-benzo[*c*]chromene (3aj)

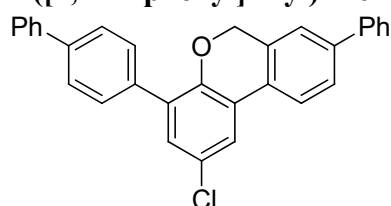

Purification by column chromatography (petroleum ether/CH<sub>2</sub>Cl<sub>2</sub>, 20:1 v/v) afforded **3aj**. White solid, 47.2 mg, 53% yield; mp 143.0–143.2 °C; IR (KBr, cm<sup>-1</sup>)  $\nu_{max}$  3030, 2845, 1485, 1392, 1217, 1016, 837, 768, 694; <sup>1</sup>H NMR (600 MHz, CDCl<sub>3</sub>, ppm)  $\delta$  7.77 (d, *J* = 8.4 Hz, 1H), 7.73 (d, *J* = 3.0 Hz, 1H), 7.69–7.61 (m, 9H), 7.47 (t, *J* = 7.8 Hz, 4H), 7.41 (s, 1H), 7.40–7.35 (m, 2H), 7.34 (d, *J* = 2.4 Hz, 1H), 5.18 (s, 2H); <sup>13</sup>C{<sup>1</sup>H} NMR (150 MHz, CDCl<sub>3</sub>, ppm)  $\delta$  150.3, 141.3, 140.7, 140.5, 140.2, 135.6, 132.1, 131.9, 129.9, 129.7, 128.9, 128.8, 128.4, 127.7, 127.4, 127.4, 127.2, 127.1, 126.9, 124.9, 123.3, 123.0, 122.4, 68.7; HRMS (ESI) *m/z*: [M+Na]<sup>+</sup> calcd for C<sub>31</sub>H<sub>21</sub>ClNaO 467.1179, Found 467.1175.

### 2-Chloro-4-phenyl-6*H*-benzo[*c*]chromene (3ak)

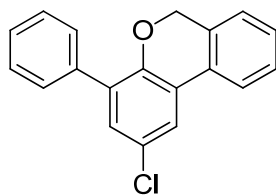

Purification by column chromatography (petroleum ether/CH<sub>2</sub>Cl<sub>2</sub>, 30:1 v/v) afforded **3ak**. Colorless liquid, 31.6 mg, 54% yield; IR (KBr, cm<sup>-1</sup>)  $\nu_{max}$  3051, 2925, 2852, 1413, 1013, 702; <sup>1</sup>H NMR (600 MHz, CDCl<sub>3</sub>, ppm)  $\delta$  7.66 (d,  $J$  = 2.4 Hz, 1H), 7.64 (d,  $J$  = 8.4 Hz, 1H), 7.51 (d,  $J$  = 7.8 Hz, 2H), 7.41 (t,  $J$  = 7.8 Hz, 2H), 7.38-7.33 (m, 2H), 7.29 (t,  $J$  = 7.8 Hz, 1H), 7.26 (d,  $J$  = 2.4 Hz, 1H), 7.12 (d,  $J$  = 7.2 Hz, 1H), 5.03 (s, 2H); <sup>13</sup>C{<sup>1</sup>H} NMR (150 MHz, CDCl<sub>3</sub>, ppm)  $\delta$  150.2, 136.6, 132.5, 131.4, 130.0, 129.3, 128.6, 128.3, 128.1, 127.6, 127.0, 125.0, 124.6, 122.4, 122.3, 68.4; HRMS (ESI)  $m/z$ : [M+Na]<sup>+</sup> calcd for C<sub>19</sub>H<sub>13</sub>ClNaO 315.0553, Found 315.0552.

### 2-Chloro-8-fluoro-4-(4-fluorophenyl)-6H-benzo[c]chromene (3al)

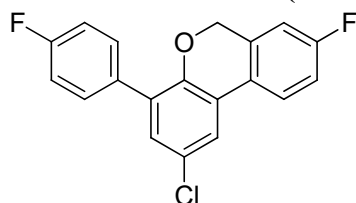

Purification by column chromatography (petroleum ether/CH<sub>2</sub>Cl<sub>2</sub>, 30:1 v/v) afforded **3al**. White solid, 24.9 mg, 38% yield; mp 153.4–153.8 °C; IR (KBr, cm<sup>-1</sup>)  $\nu_{max}$  2918, 2866, 1507, 1223, 1012, 824; <sup>1</sup>H NMR (600 MHz, CDCl<sub>3</sub>, ppm)  $\delta$  7.64 (dd,  $J_1$  = 8.4 Hz,  $J_2$  = 4.8 Hz, 1H), 7.62 (d,  $J$  = 2.4 Hz, 1H), 7.48 (dd,  $J_1$  = 8.4 Hz,  $J_2$  = 5.4 Hz, 2H), 7.23 (d,  $J$  = 2.4 Hz, 1H), 7.13-7.08 (m, 3H), 6.88 (dd,  $J_1$  = 8.4 Hz,  $J_2$  = 2.4 Hz, 1H), 5.03 (s, 2H); <sup>13</sup>C{<sup>1</sup>H} NMR (150 MHz, CDCl<sub>3</sub>, ppm)  $\delta$  162.8 (d,  $J$  = 247.2 Hz), 162.4 (d,  $J$  = 245.7 Hz), 149.6, 133.5 (d,  $J$  = 7.5 Hz), 132.4 (d,  $J$  = 3.3 Hz), 131.6, 131.0 (d,  $J$  = 7.65 Hz), 129.7, 127.3, 125.5 (d,  $J$  = 3.3 Hz), 124.5 (d,  $J$  = 8.55 Hz), 124.4, 122.2, 115.7 (d,  $J$  = 21.75 Hz), 115.1 (d,  $J$  = 21.6 Hz), 111.9 (d,  $J$  = 22.8 Hz), 68.0; HRMS (ESI)  $m/z$ : [M+Na]<sup>+</sup> calcd for C<sub>19</sub>H<sub>11</sub>ClF<sub>2</sub>NaO 351.0364, Found 351.0362.

### 2,8-Dichloro-4-(4-chlorophenyl)-6H-benzo[c]chromene (3am)

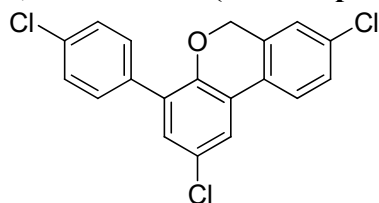

Purification by column chromatography (petroleum ether/CH<sub>2</sub>Cl<sub>2</sub>, 30:1 v/v) afforded **3al**. White solid, 24.6 mg, 34% yield; mp 184.2–184.4 °C; IR (KBr, cm<sup>-1</sup>)  $\nu_{max}$  2915, 2863, 1494, 1385, 1217, 1014, 822; <sup>1</sup>H NMR (600 MHz, CDCl<sub>3</sub>, ppm)  $\delta$  7.64 (d,  $J$  = 2.4 Hz, 1H), 7.60 (d,  $J$  = 7.8 Hz, 1H), 7.45 (d,  $J$  = 8.4 Hz, 2H), 7.40 (d,  $J$  = 8.4 Hz, 2H), 7.37 (dd,  $J_1$  = 8.4 Hz,  $J_2$  = 2.4 Hz, 1H), 7.25 (d,  $J$  = 2.4 Hz, 1H), 7.17 (d,  $J$  = 1.8 Hz, 1H), 5.02 (s, 2H); <sup>13</sup>C{<sup>1</sup>H} NMR (150 MHz, CDCl<sub>3</sub>, ppm)  $\delta$  149.9,

134.8, 134.3, 133.8, 132.9, 131.4, 130.6, 130.0, 128.8, 128.4, 127.8, 127.4, 124.9, 124.3, 123.9, 122.6, 67.9; HRMS (MALDI)  $m/z$ :  $[M-H]^+$  calcd for  $C_{19}H_{10}Cl_3O$  358.9792, Found 358.9795.

#### 4-Chloro-6*H*-benzo[*c*]chromene (3kk)

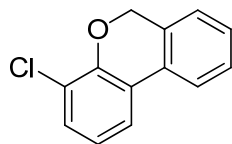

Purification by column chromatography (petroleum ether/ $CH_2Cl_2$ , 30:1 v/v) afforded **3kk**. White solid, 19.1 mg, 44% yield; mp 61.1–61.2 °C; IR (KBr,  $cm^{-1}$ )  $\nu_{max}$  2920, 1425, 1196, 1002, 739;  $^1H$  NMR (600 MHz,  $CDCl_3$ , ppm)  $\delta$  7.68 (d,  $J = 7.8$  Hz, 1H), 7.63 (dd,  $J_1 = 7.8$  Hz,  $J_2 = 1.2$  Hz, 1H), 7.39 (t,  $J = 7.8$  Hz, 1H), 7.34–7.29 (m, 2H), 7.18 (d,  $J = 7.2$  Hz, 1H), 6.99 (t,  $J = 7.8$  Hz, 1H), 5.22 (s, 2H);  $^{13}C\{^1H\}$  NMR (150 MHz,  $CDCl_3$ , ppm)  $\delta$  150.5, 131.0, 129.8, 129.4, 128.6, 128.3, 124.7, 124.5, 122.5, 122.4, 122.2, 121.7, 68.9; HRMS (ESI)  $m/z$ :  $[M+Na]^+$  calcd for  $C_{13}H_9ClNaO$  239.0240, Found 239.0239.

#### 4-Chloro-7,8,9,10-tetradeuterium-6*H*-benzo[*c*]chromene (3kk-D)

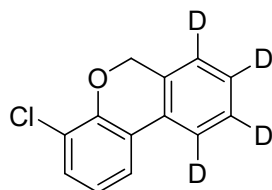

Purification by column chromatography (petroleum ether/ $CH_2Cl_2$ , 30:1 v/v) afforded **3kk-D**. White solid, 15.0 mg, 34% yield; mp 61.0–61.1 °C; IR (KBr,  $cm^{-1}$ )  $\nu_{max}$  2919, 1455, 1227, 1005, 731;  $^1H$  NMR (600 MHz,  $CDCl_3$ , ppm)  $\delta$  7.63 (dd,  $J_1 = 7.8$  Hz,  $J_2 = 1.2$  Hz, 1H), 7.30 (dd,  $J_1 = 7.8$  Hz,  $J_2 = 1.2$  Hz, 1H), 6.99 (t,  $J = 7.8$  Hz, 1H), 5.23 (s, 2H);  $^{13}C\{^1H\}$  NMR (150 MHz,  $CDCl_3$ , ppm)  $\delta$  150.5, 130.9, 129.8, 129.3, 128.1 (t,  $J = 24.3$  Hz), 127.8 (t,  $J = 24.6$  Hz), 124.5, 124.3 (t,  $J = 24.15$  Hz), 122.5, 122.2, 122.0 (t,  $J = 23.85$  Hz), 121.7; HRMS (ESI)  $m/z$ :  $[M+Na]^+$  calcd for  $C_{13}H_5D_4ClNaO$  243.0491, Found 243.0489.

### Synthesis of compound 4

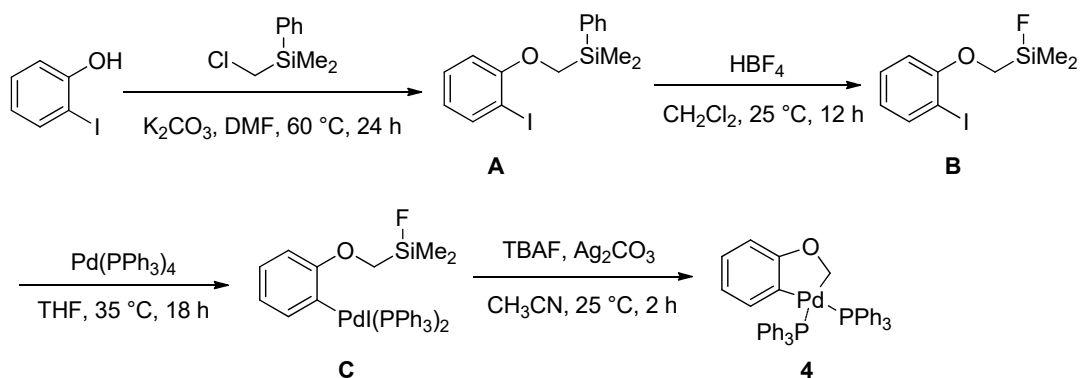

The compound **A** was synthesized according to literature method.<sup>3</sup> Compound **A** is known, and the data are consistent with the literature.<sup>3</sup>

The compound **B** was synthesized according to modified literature method.<sup>3</sup> The compound **A** (73.7 mg, 0.2 mmol) was placed into a 25 mL Schlenk tube equipped with a magnetic stir bar. To this tube was added in sequence CH<sub>2</sub>Cl<sub>2</sub> (2.0 mL), HBF<sub>4</sub> (252  $\mu$ L, 54% solution in Et<sub>2</sub>O, 1.0 mmol) with an injection syringe. The reaction mixture was stirred for 12 h at 25 °C in an oil bath. Then the solution was cooled to 0 °C, quenched by the gradual addition of water, and extracted with dichloromethane. The combined organic layer was washed with a saturated solution of NaHCO<sub>3</sub> to neutralize the acid, dried over anhydrous MgSO<sub>4</sub>, and concentrated in vacuum. The product **B** was obtained as a very pale yellow oil (55.8 mg, 90%). Compound **B** is known, and the data are consistent with the literature.<sup>3</sup>

The compound **C** was synthesized according to modified literature method.<sup>3</sup> Pd(PPh<sub>3</sub>)<sub>4</sub> (115.6 mg, 0.1 mmol), and compound **B** (31.0 mg, 0.1 mmol) were placed into a 25 mL Schlenk tube equipped with a magnetic stir bar. To this mixture was added THF (5.0 mL) with an injection syringe under nitrogen atmosphere. The reaction mixture was stirred for 18 h at 35 °C in an oil bath. The solvent was evaporated, and Et<sub>2</sub>O was added into the residue. The precipitate was filtered to give as a yellow solid (59.3 mg, 63%). Compound **C** is known, and the data are consistent with the literature.<sup>3</sup>

The compound **4** was synthesized according to modified literature method.<sup>3</sup> Compound **C** (47.1 mg, 0.05 mmol), tetrabutylammonium fluoride (19.6 mg, 0.075 mmol), and Ag<sub>2</sub>CO<sub>3</sub> (27.6 mg, 0.1 mmol) were placed into a 25 mL Schlenk tube equipped with a magnetic stir bar. To this mixture was added MeCN (3.0 mL) with an injection syringe under nitrogen atmosphere. The reaction mixture was stirred for 2 h at 25 °C in an oil bath. The solvent was removed under reduced pressure, and the residue was partially dissolved in CH<sub>2</sub>Cl<sub>2</sub> and filtered through Celite. CH<sub>2</sub>Cl<sub>2</sub> in the filtrate was removed under reduced pressure, and Et<sub>2</sub>O was added into the residue. The mixture was filtered through Celite, and Et<sub>2</sub>O in the filtrate was removed under reduced pressure to give as a white solid (13.2 mg, 36%). All of the manipulations were carried out in a glove box because the compound **4** is easily decomposed by water. Compound **4** is known, and the data are consistent with the literature.<sup>4</sup>

## General procedure for synthesis of compounds **5**

Pd(OAc)<sub>2</sub> (2.2 mg, 0.01 mmol), K<sub>2</sub>CO<sub>3</sub> (138.2 mg, 1.0 mmol), *n*-Bu<sub>4</sub>NBr (64.5 mg, 0.2 mmol) and 2-iodoanisole derivatives **1** (0.2 mmol) were placed into a 25 mL Schlenk tube equipped with a magnetic stir bar. To this mixture was added DMF (2.0 mL) with an injection syringe under nitrogen atmosphere. The reaction mixture was stirred for 24 h at 110 °C in an oil bath. Then the solution was cooled to room temperature, quenched by the addition of 30 mL water, and extracted with dichloromethane (3  $\times$  20 mL). The combined organic layer was washed with brine (3  $\times$  30 mL), dried over anhydrous MgSO<sub>4</sub>, and concentrated in vacuum. The residue was purified by column chromatography on silica gel to afford the products **5**.

**2,7-Dichloro-4-(5-chloro-2-methoxyphenyl)-10-methoxy-6H-benzo[c]chromene (5a)**

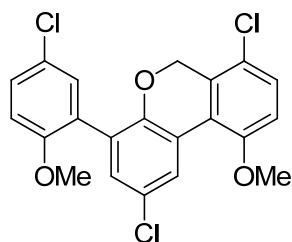

Purification by column chromatography (petroleum ether/CH<sub>2</sub>Cl<sub>2</sub>, 8:1 v/v) afforded **5a**. White solid, 14.3 mg, 51% yield; mp 80.0–80.6 °C; IR (KBr, cm<sup>-1</sup>)  $\nu_{max}$  2962, 2818, 1457, 1416, 1270, 1240, 747; <sup>1</sup>H NMR (600 MHz, CDCl<sub>3</sub>, ppm)  $\delta$  8.35 (d,  $J$  = 3.0 Hz, 1H), 7.31 (dd,  $J_1$  = 9.0 Hz,  $J_2$  = 2.4 Hz, 1H), 7.28 (d,  $J$  = 9.0 Hz, 1H), 7.21 (d,  $J$  = 2.4 Hz, 1H), 7.17 (d,  $J$  = 3.0 Hz, 1H), 6.91 (d,  $J$  = 8.4 Hz, 1H), 6.90 (d,  $J$  = 9.0 Hz, 1H), 5.08 (s, 2H), 3.95 (s, 3H), 3.79 (s, 3H); <sup>13</sup>C{<sup>1</sup>H} NMR (150 MHz, CDCl<sub>3</sub>, ppm)  $\delta$  155.6, 155.3, 151.1, 132.2, 130.9, 130.2, 129.3, 128.8, 128.0, 127.6, 126.3, 125.3, 122.9, 122.2, 119.9, 112.2, 112.1, 65.9, 56.0, 55.9; HRMS (ESI) m/z: [M+Na]<sup>+</sup> calcd for C<sub>21</sub>H<sub>15</sub>Cl<sub>3</sub>NaO<sub>3</sub> 442.9984, Found 442.9985.

**10-Methoxy-4-(2-methoxyphenyl)-6H-benzo[c]chromene (5i)<sup>5</sup>**

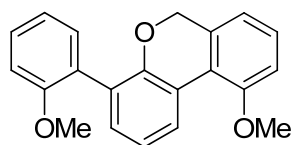

Purification by column chromatography (petroleum ether/CH<sub>2</sub>Cl<sub>2</sub>, 5:1 v/v) afforded **5i**. White solid, 9.1 mg, 43% yield; mp 136.8–137.3 °C; IR (KBr, cm<sup>-1</sup>)  $\nu_{max}$  2937, 2837, 1492, 1457, 1421, 1270, 1230, 1028, 805, 653; <sup>1</sup>H NMR (600 MHz, CDCl<sub>3</sub>, ppm)  $\delta$  8.40 (dd,  $J_1$  = 7.8 Hz,  $J_2$  = 1.8 Hz, 1H), 7.36-7.32 (m, 1H), 7.27 (dd,  $J_1$  = 7.8 Hz,  $J_2$  = 1.8 Hz, 1H), 7.23 (t,  $J$  = 7.8 Hz, 1H), 7.20 (dd,  $J_1$  = 7.8 Hz,  $J_2$  = 1.8 Hz, 1H), 7.11 (t,  $J$  = 7.8 Hz, 1H), 7.01 (td,  $J_1$  = 7.8 Hz,  $J_2$  = 1.2 Hz, 1H), 6.99 (d,  $J$  = 8.4 Hz, 1H), 6.95 (d,  $J$  = 7.8 Hz, 1H), 6.76 (d,  $J$  = 7.2 Hz, 1H), 4.94 (s, 2H), 3.94 (s, 3H), 3.80 (s, 3H); <sup>13</sup>C{<sup>1</sup>H} NMR (150 MHz, CDCl<sub>3</sub>, ppm)  $\delta$  157.0, 156.6, 152.7, 135.0, 131.4, 130.5, 128.6, 128.3, 128.0, 127.6, 127.4, 122.3, 121.1, 120.4, 119.2, 117.1, 111.3, 110.9, 68.8, 55.6, 55.6; HRMS (ESI) m/z: [M+H]<sup>+</sup> calcd for C<sub>21</sub>H<sub>19</sub>O<sub>3</sub> 319.1334, Found 319.1330.

## References

1. B. Luo, J.-M. Gao and M. Lautens, Palladium-Catalyzed Norbornene-Mediated Tandem Amination/Cyanation Reaction: A Method for the Synthesis of *ortho*-Aminated Benzonitriles, *Org. Lett.*, 2016, **18**, 4166–4169.
2. Z. Shen, S. Zhang, H. Geng, J. Wang, X. Zhang, A. Zhou, C. Yao, X. Chen and W. Wang, Trideuteromethylation Enabled by a Sulfoxonium Metathesis Reaction, *Org. Lett.*, 2019, **21**, 448–452.
3. C. Mateo, C. Fernández-Rivas, D. J. Cárdenas and A. M. Echavarren,

Intramolecular Transmetalation of Arylpalladium(II) and Arylplatinum(II) Complexes with Silanes and Stannanes, *Organometallics*, 1998, **17**, 3661–3669.

4. C. Mateo, D. J. Cárdenas, C. Fernández-Rivas and A. M. Echavarren, Isolation of Transmetalation Intermediates in the Stille Cross-Coupling Reaction of Stannanes: Synthesis of Palladacycles, Ligand Substitution, and Insertion Reactions, *Chem. Eur. J.*, 1996, **2**, 1596–1606.

5. G. Dyker, Palladium-Catalyzed C–H Activation of Methoxy Groups: A Facile Synthesis of Substituted 6*H*-Dibenzo[*b,d*]pyrans, *Angew. Chem. Int. Ed.*, 1992, **31**, 1023–1025.



Figure S1. <sup>1</sup>H NMR spectrum (600 MHz, CDCl<sub>3</sub>) of 3aa

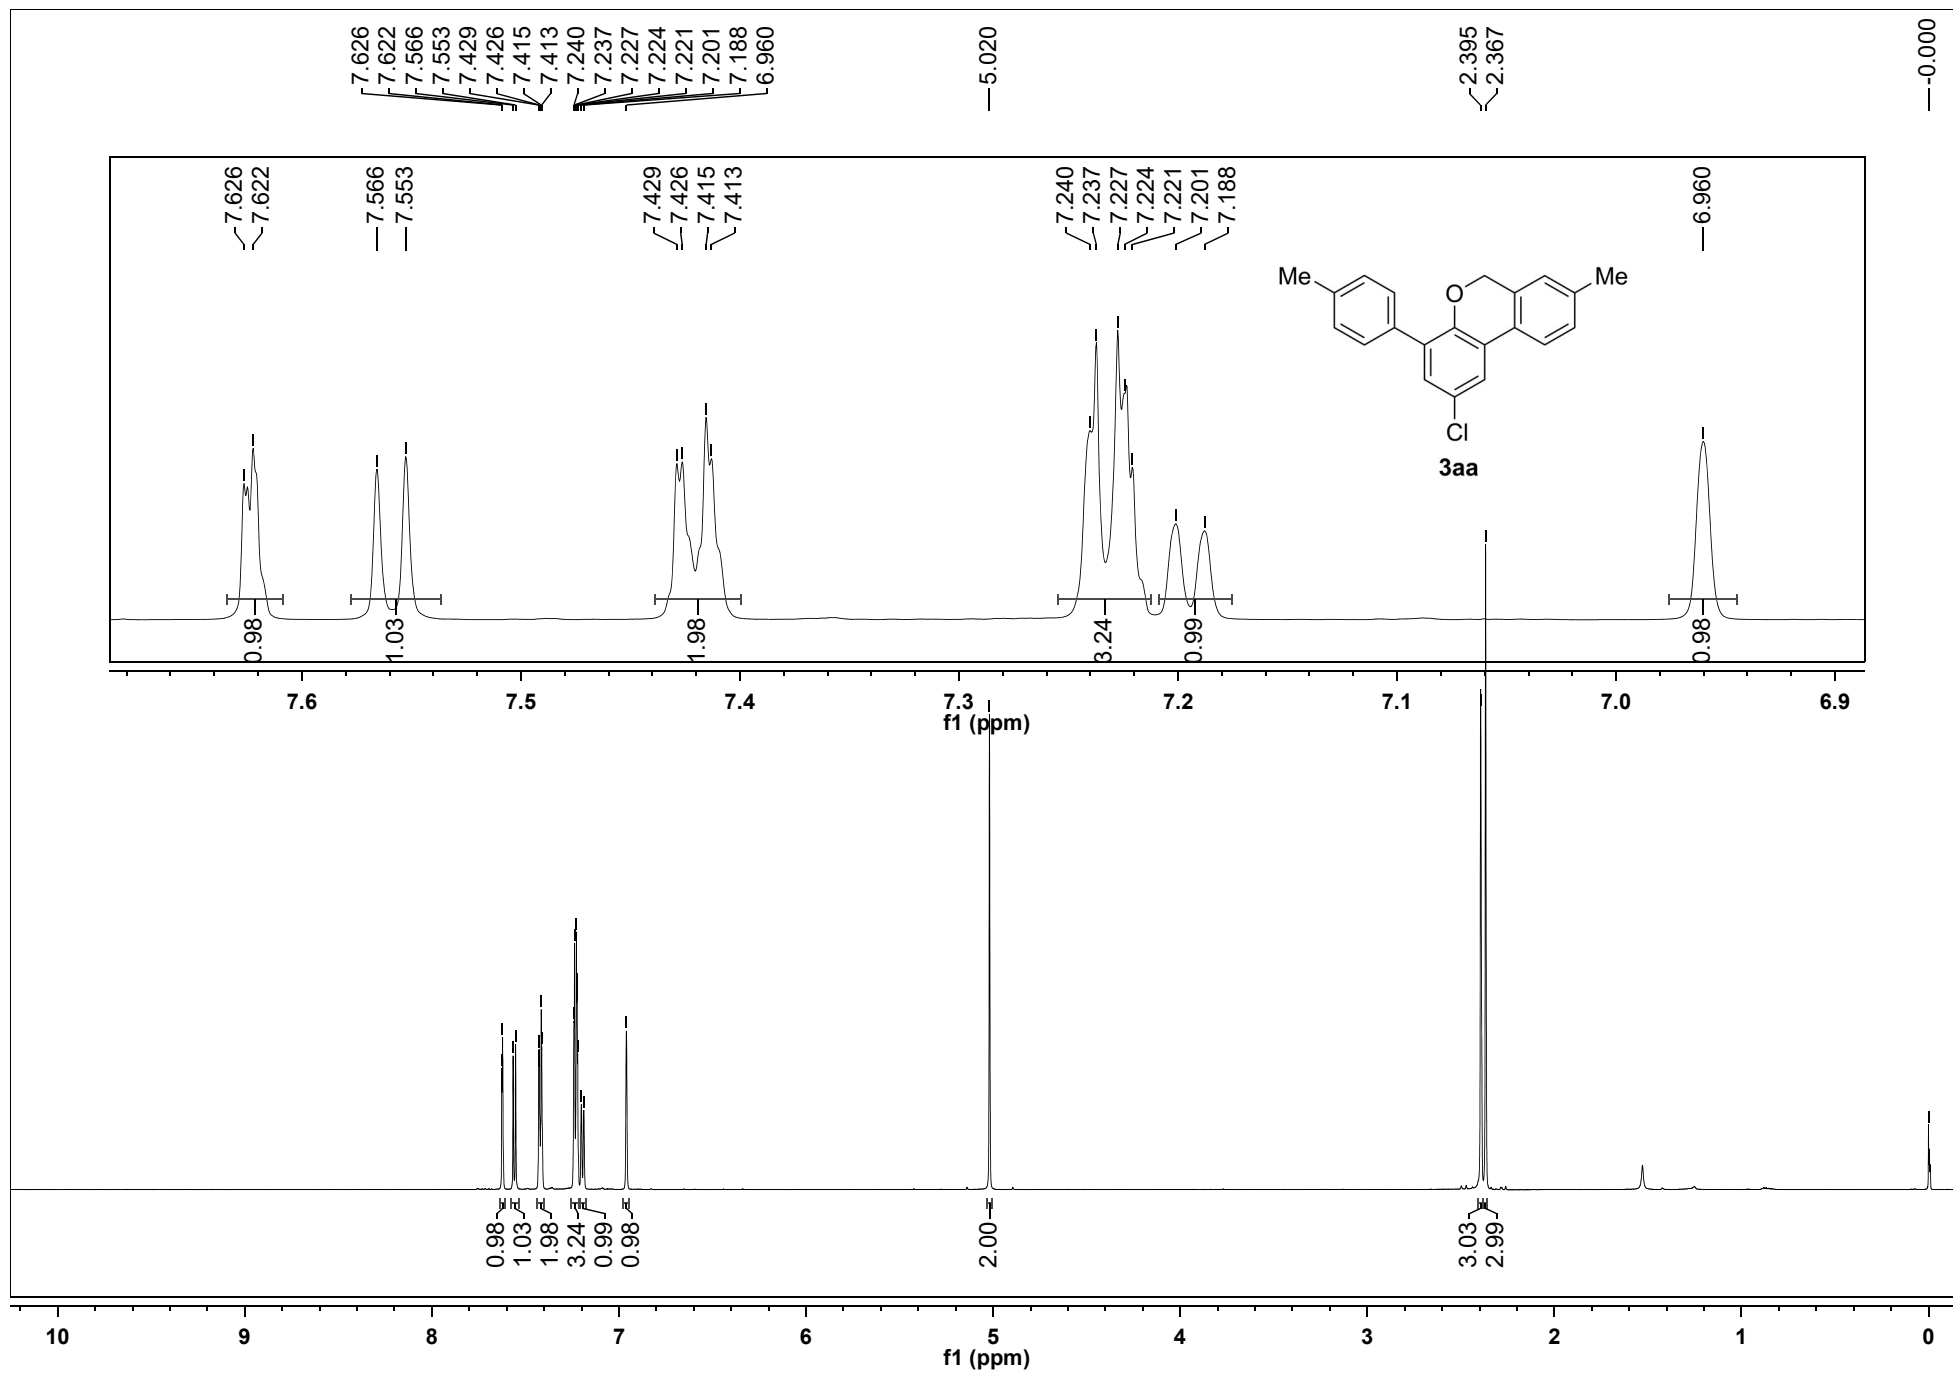

Figure S2.  $^{13}\text{C}\{^1\text{H}\}$  NMR spectrum (150 MHz,  $\text{CDCl}_3$ ) of 3aa

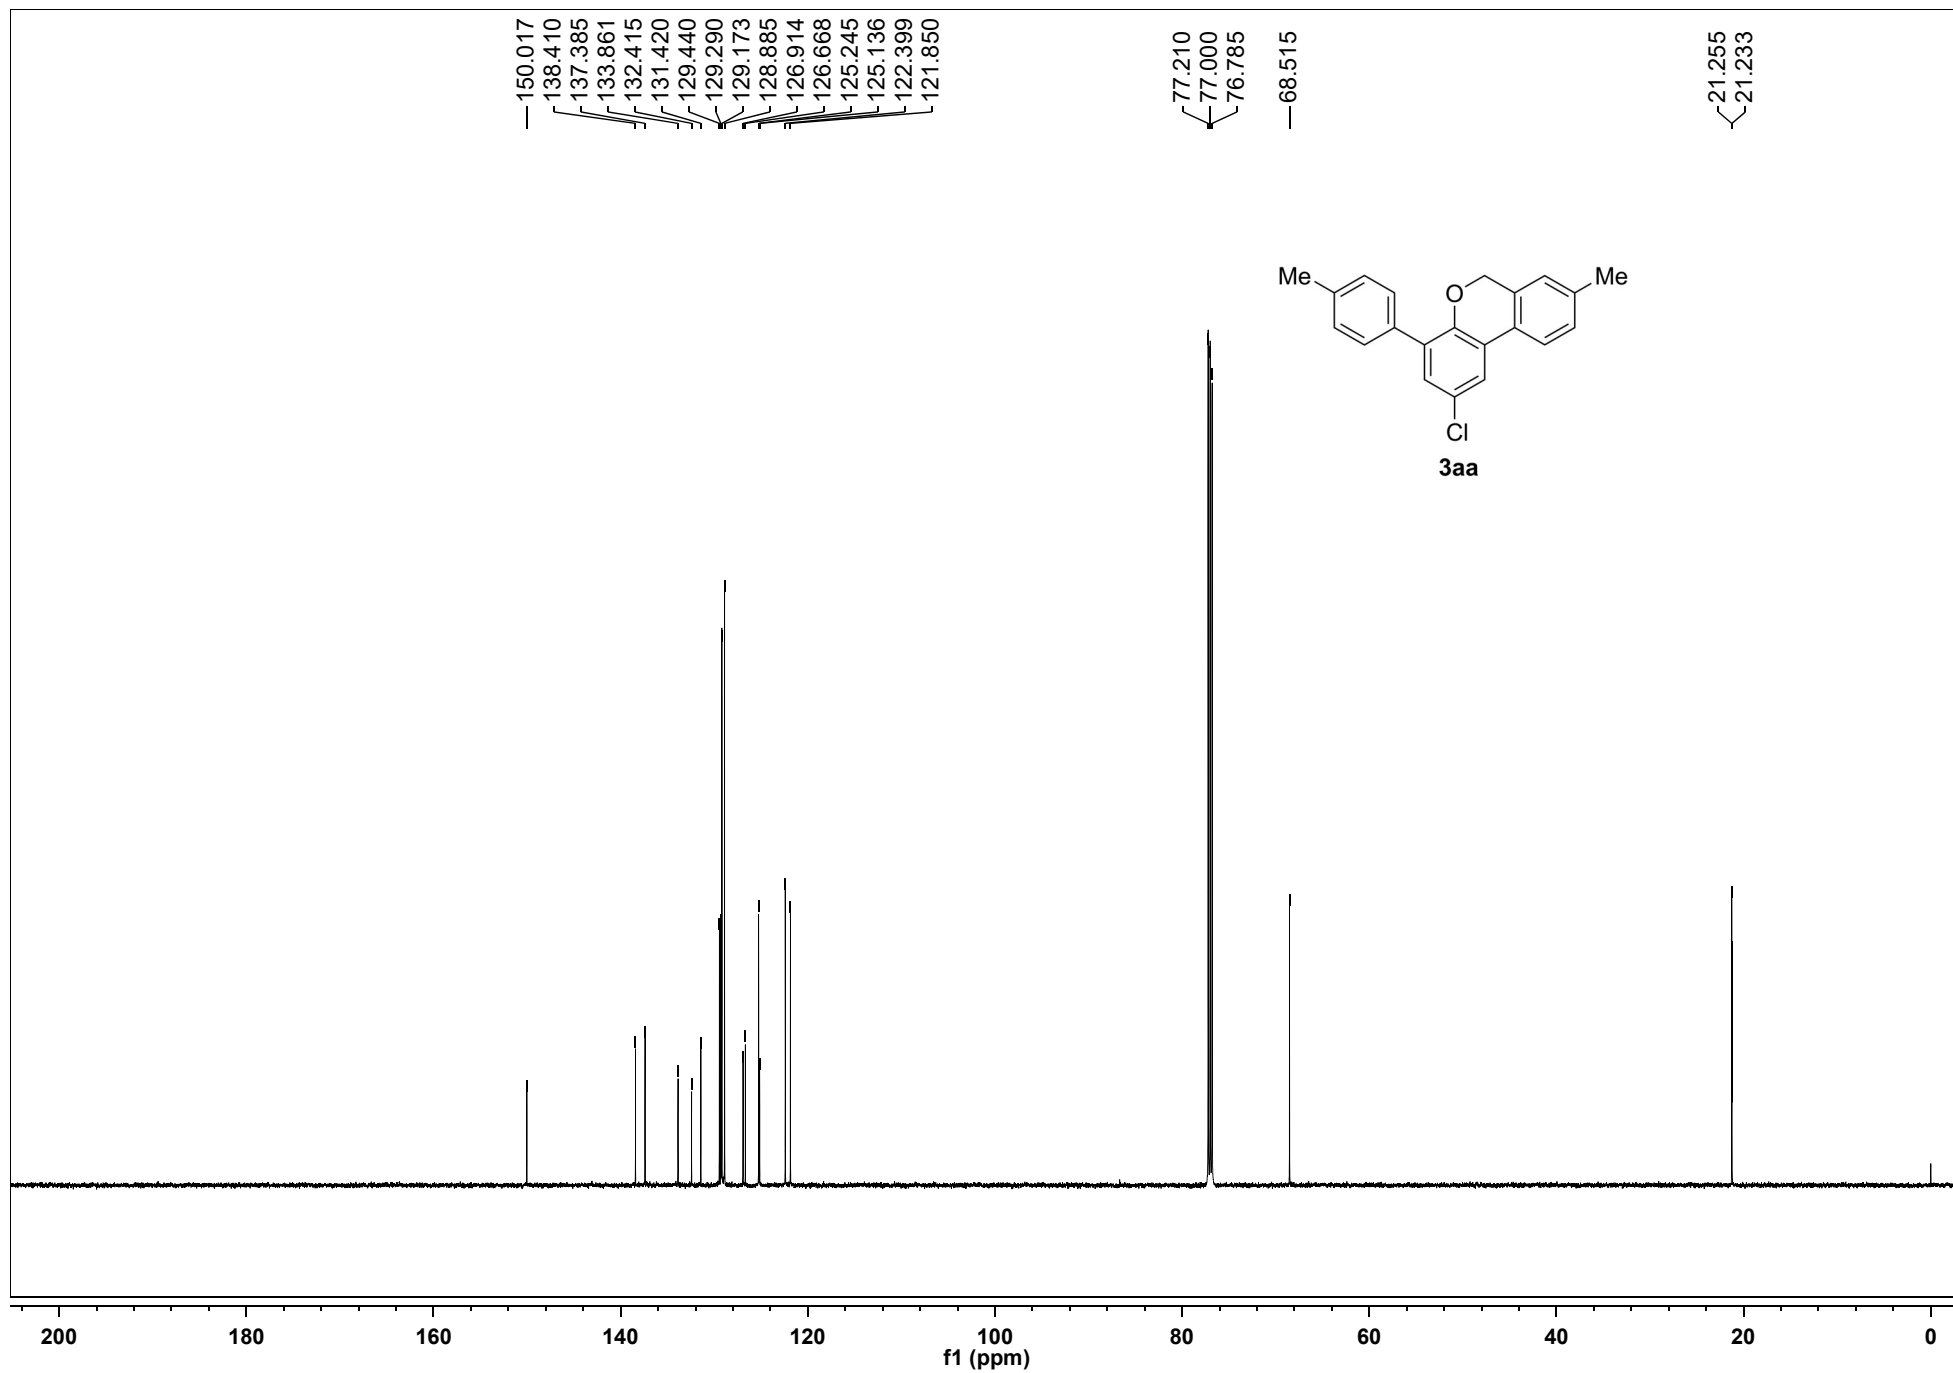

Figure S3. <sup>1</sup>H NMR spectrum (600 MHz, CDCl<sub>3</sub>) of 3ba

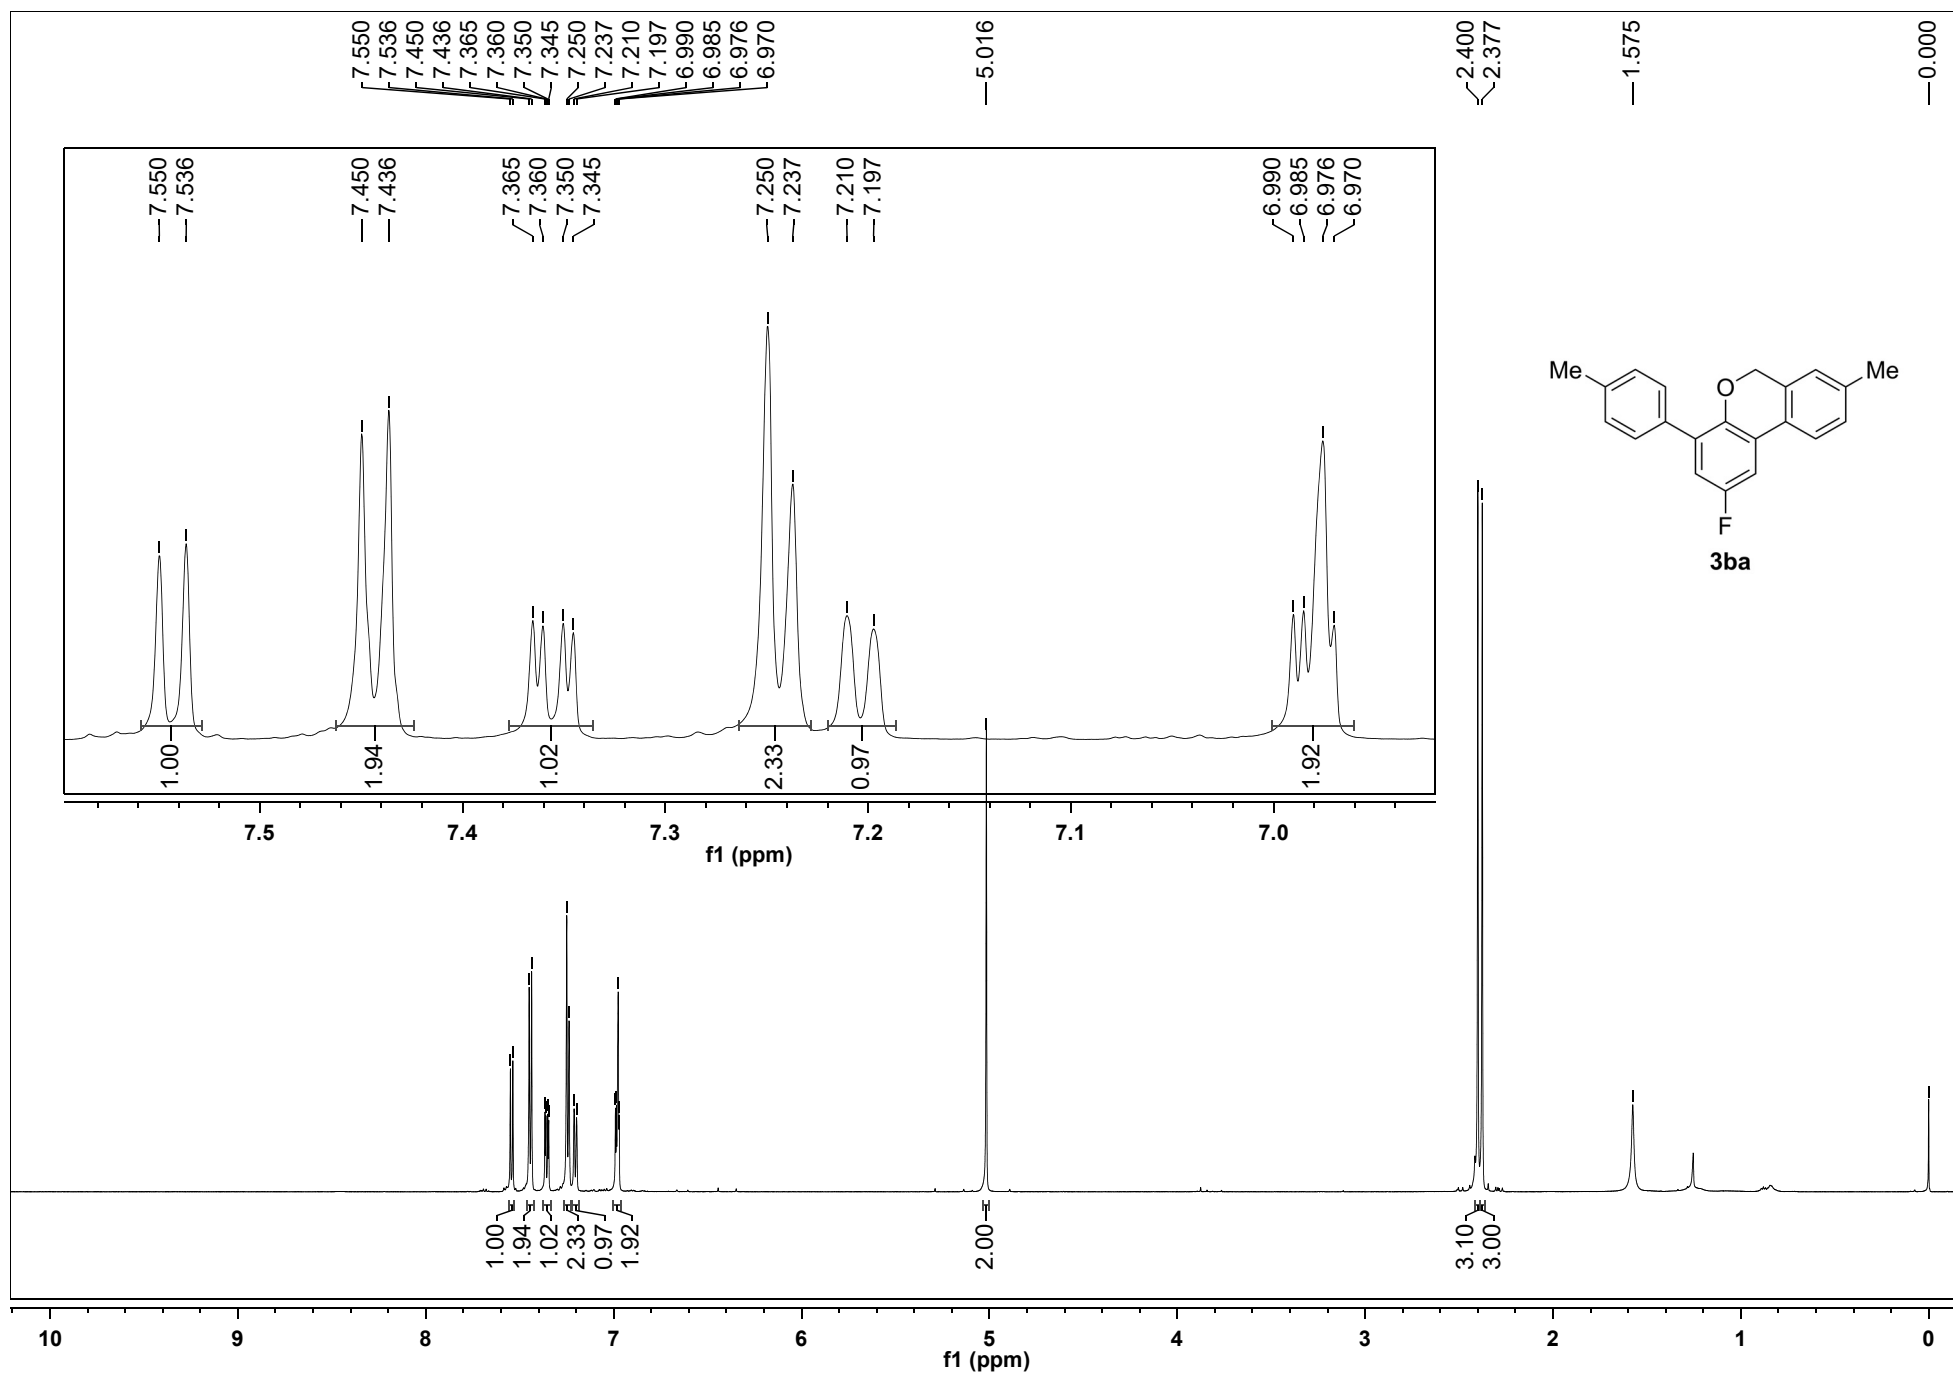

Figure S4.  $^{13}\text{C}\{^1\text{H}\}$  NMR spectrum (150 MHz,  $\text{CDCl}_3$ ) of 3ba

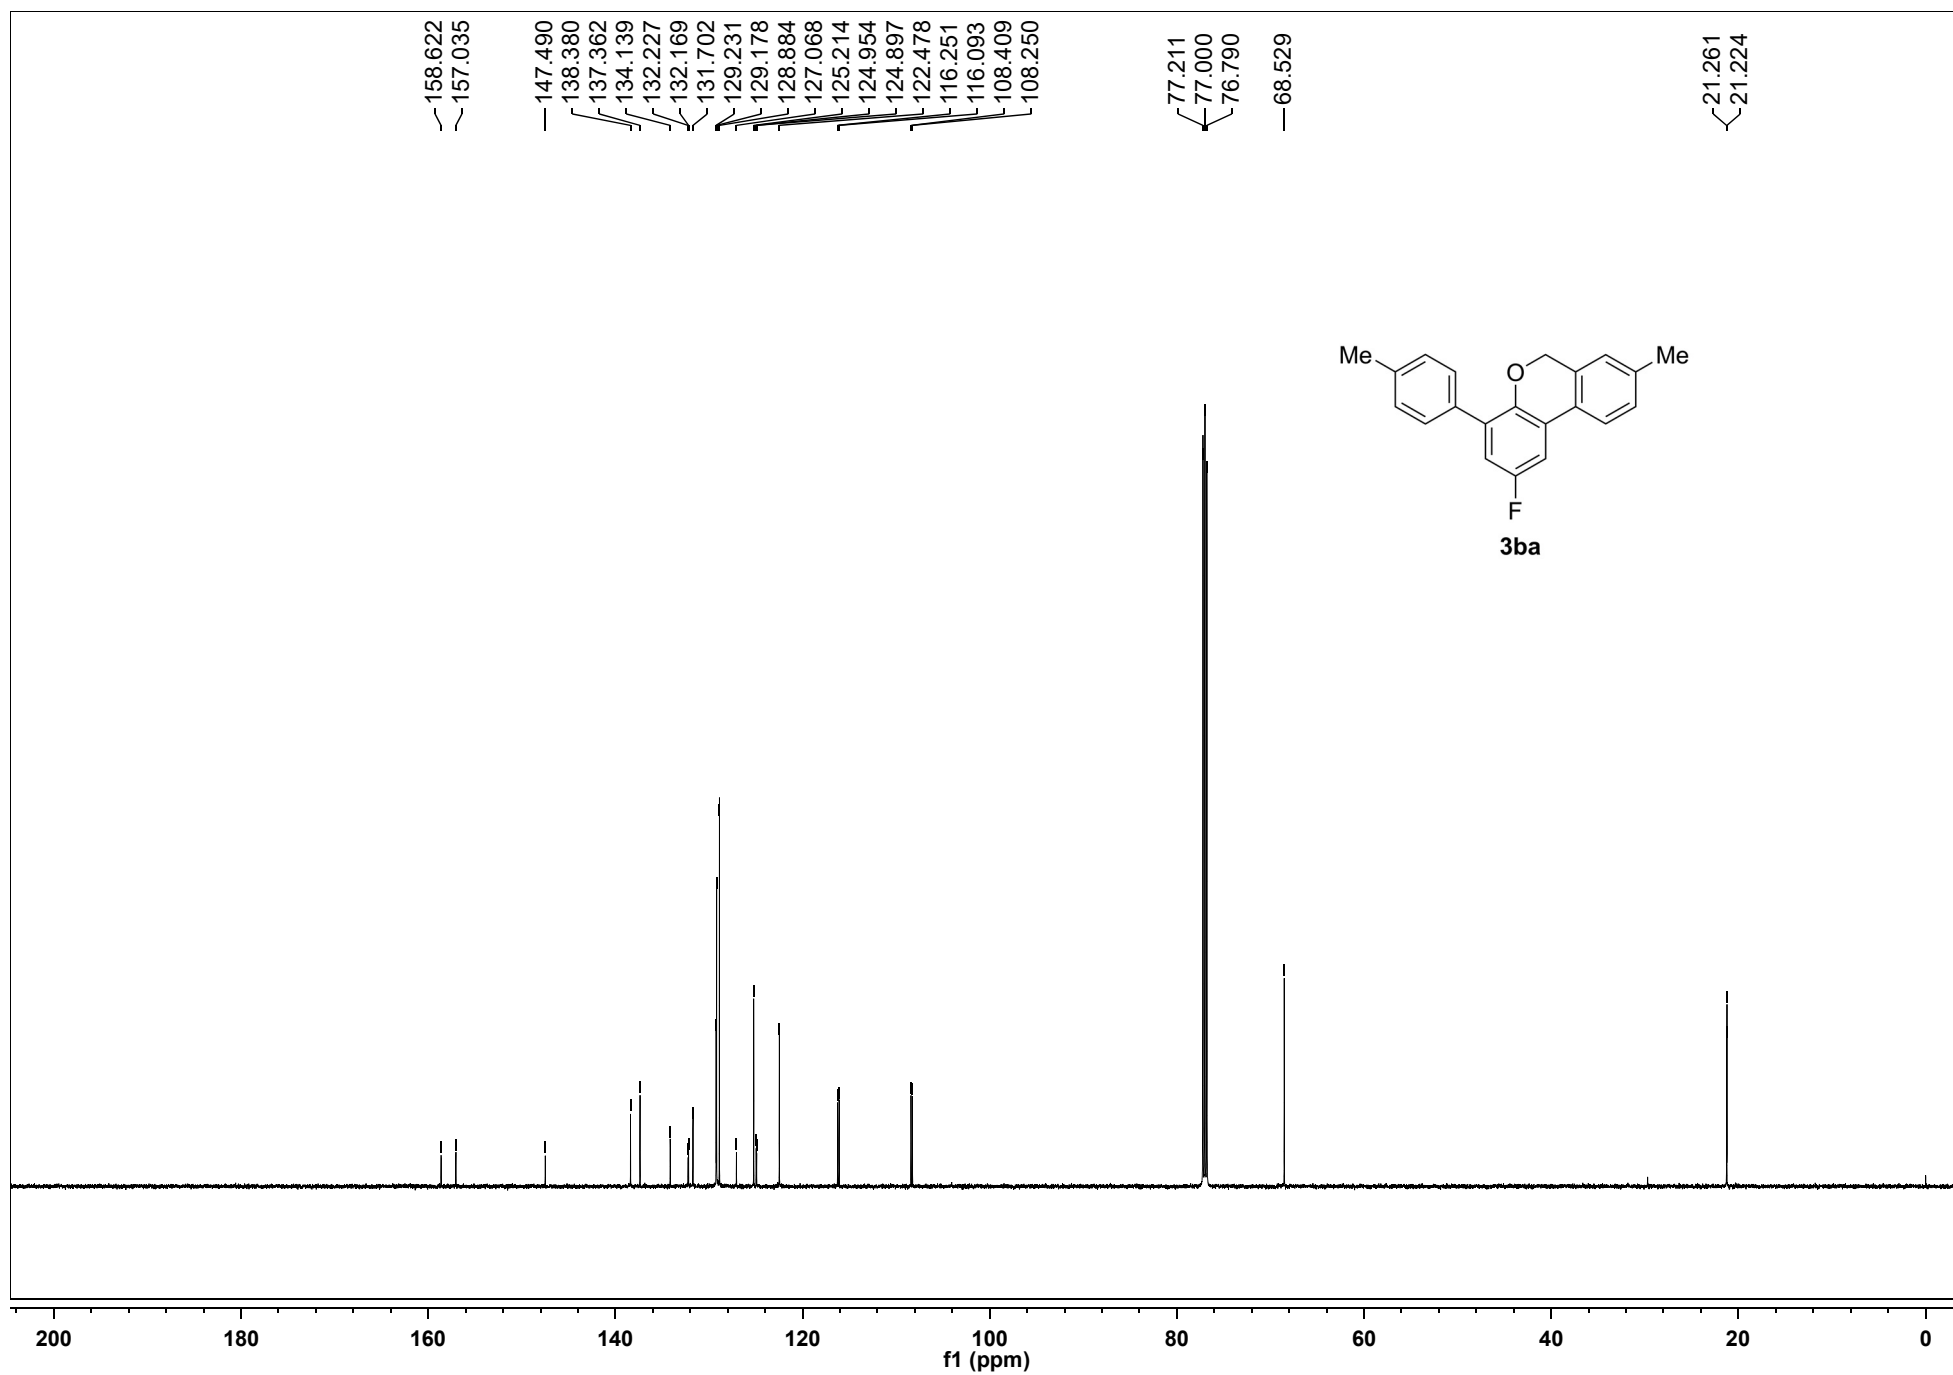

Figure S5. <sup>1</sup>H NMR spectrum (600 MHz, CDCl<sub>3</sub>) of 3ca

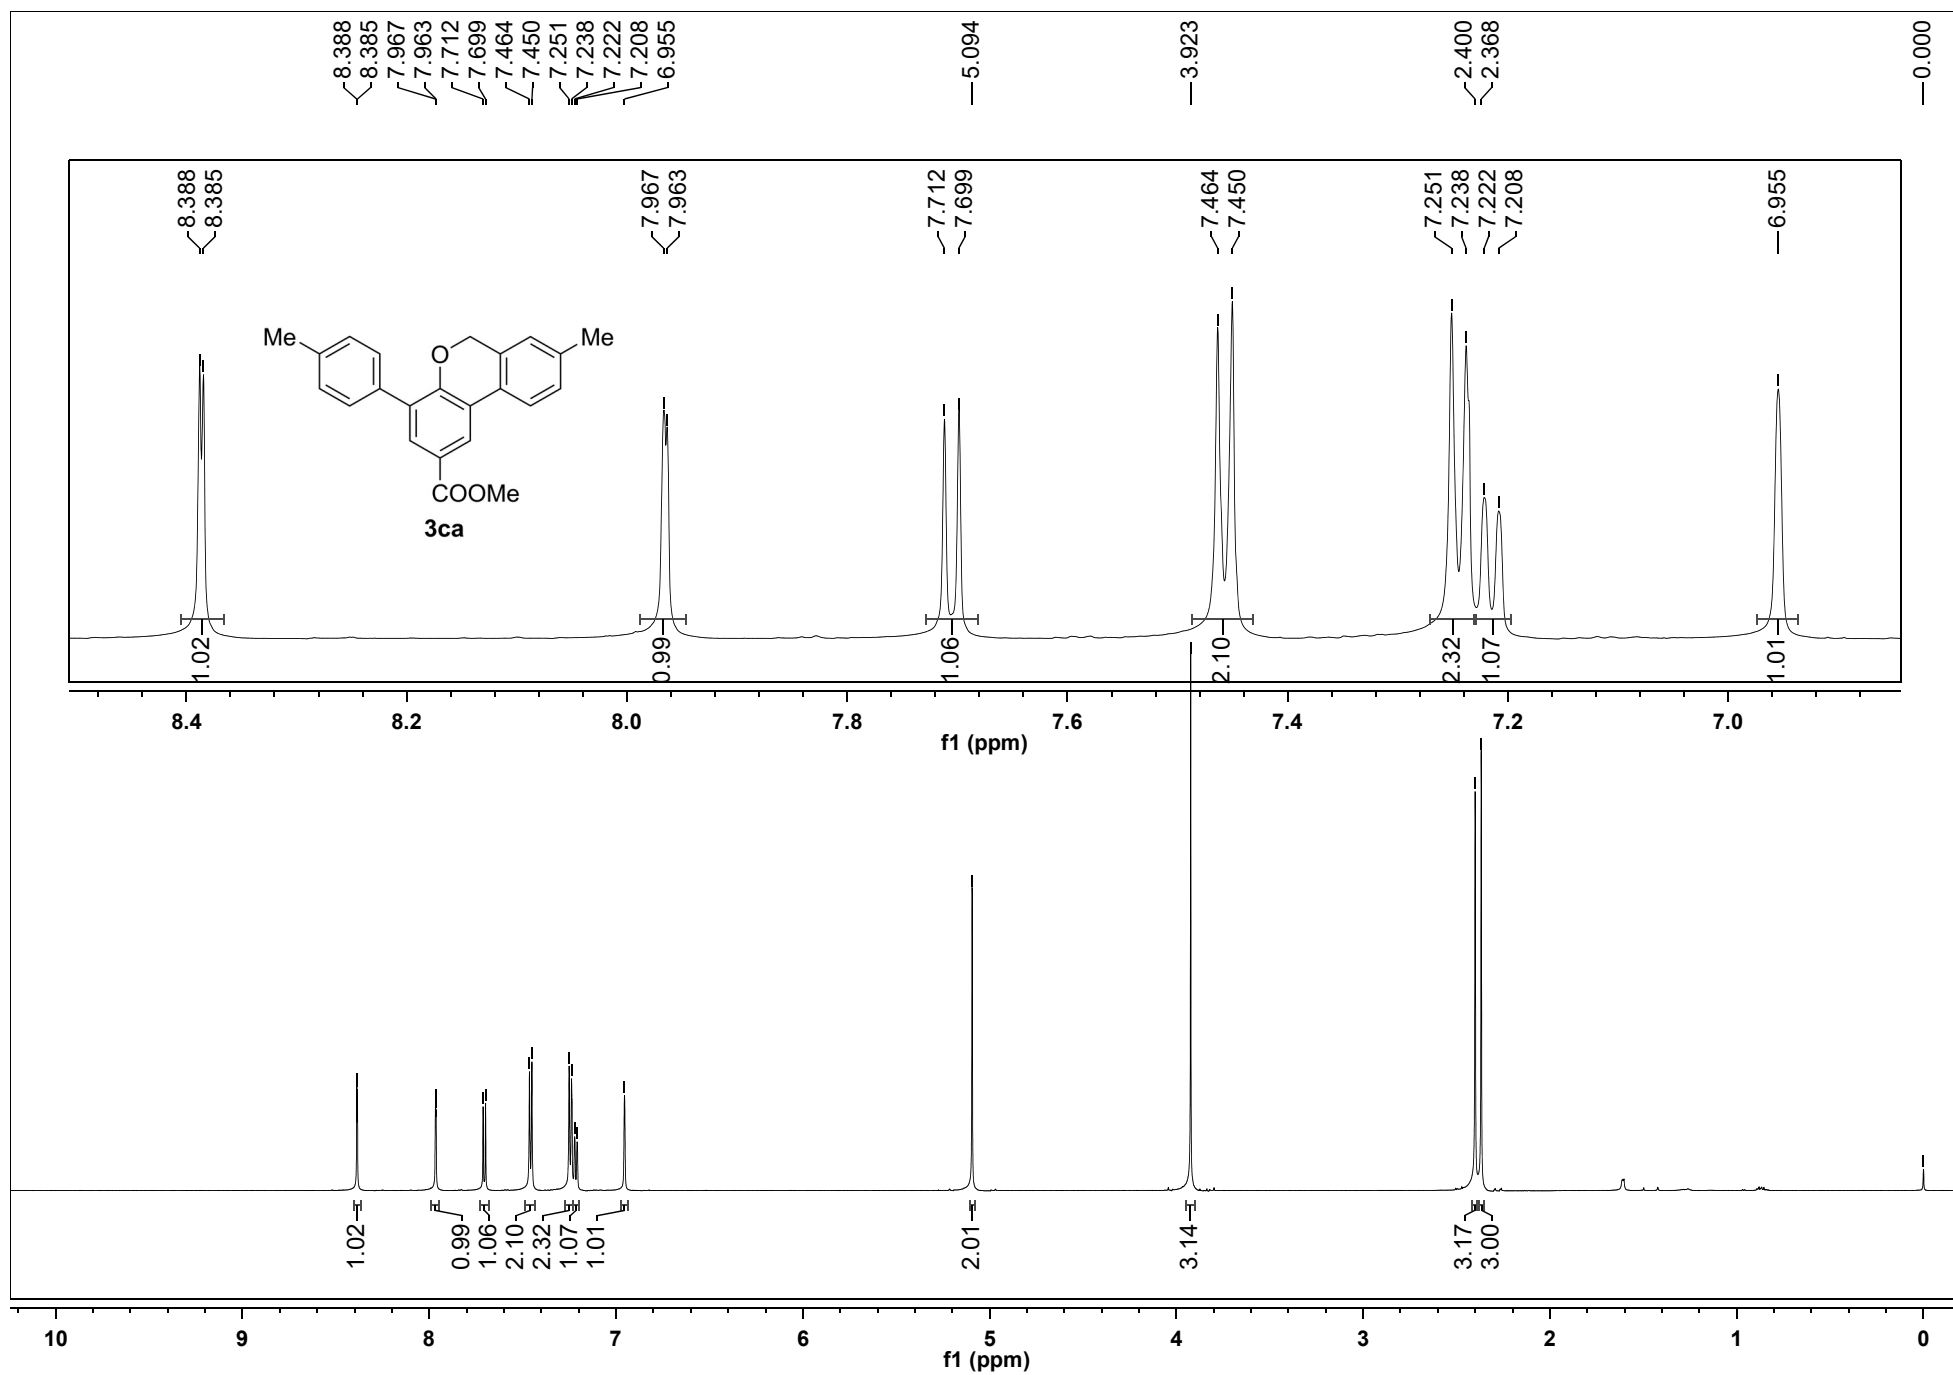

Figure S6.  $^{13}\text{C}\{^1\text{H}\}$  NMR spectrum (150 MHz,  $\text{CDCl}_3$ ) of 3ca

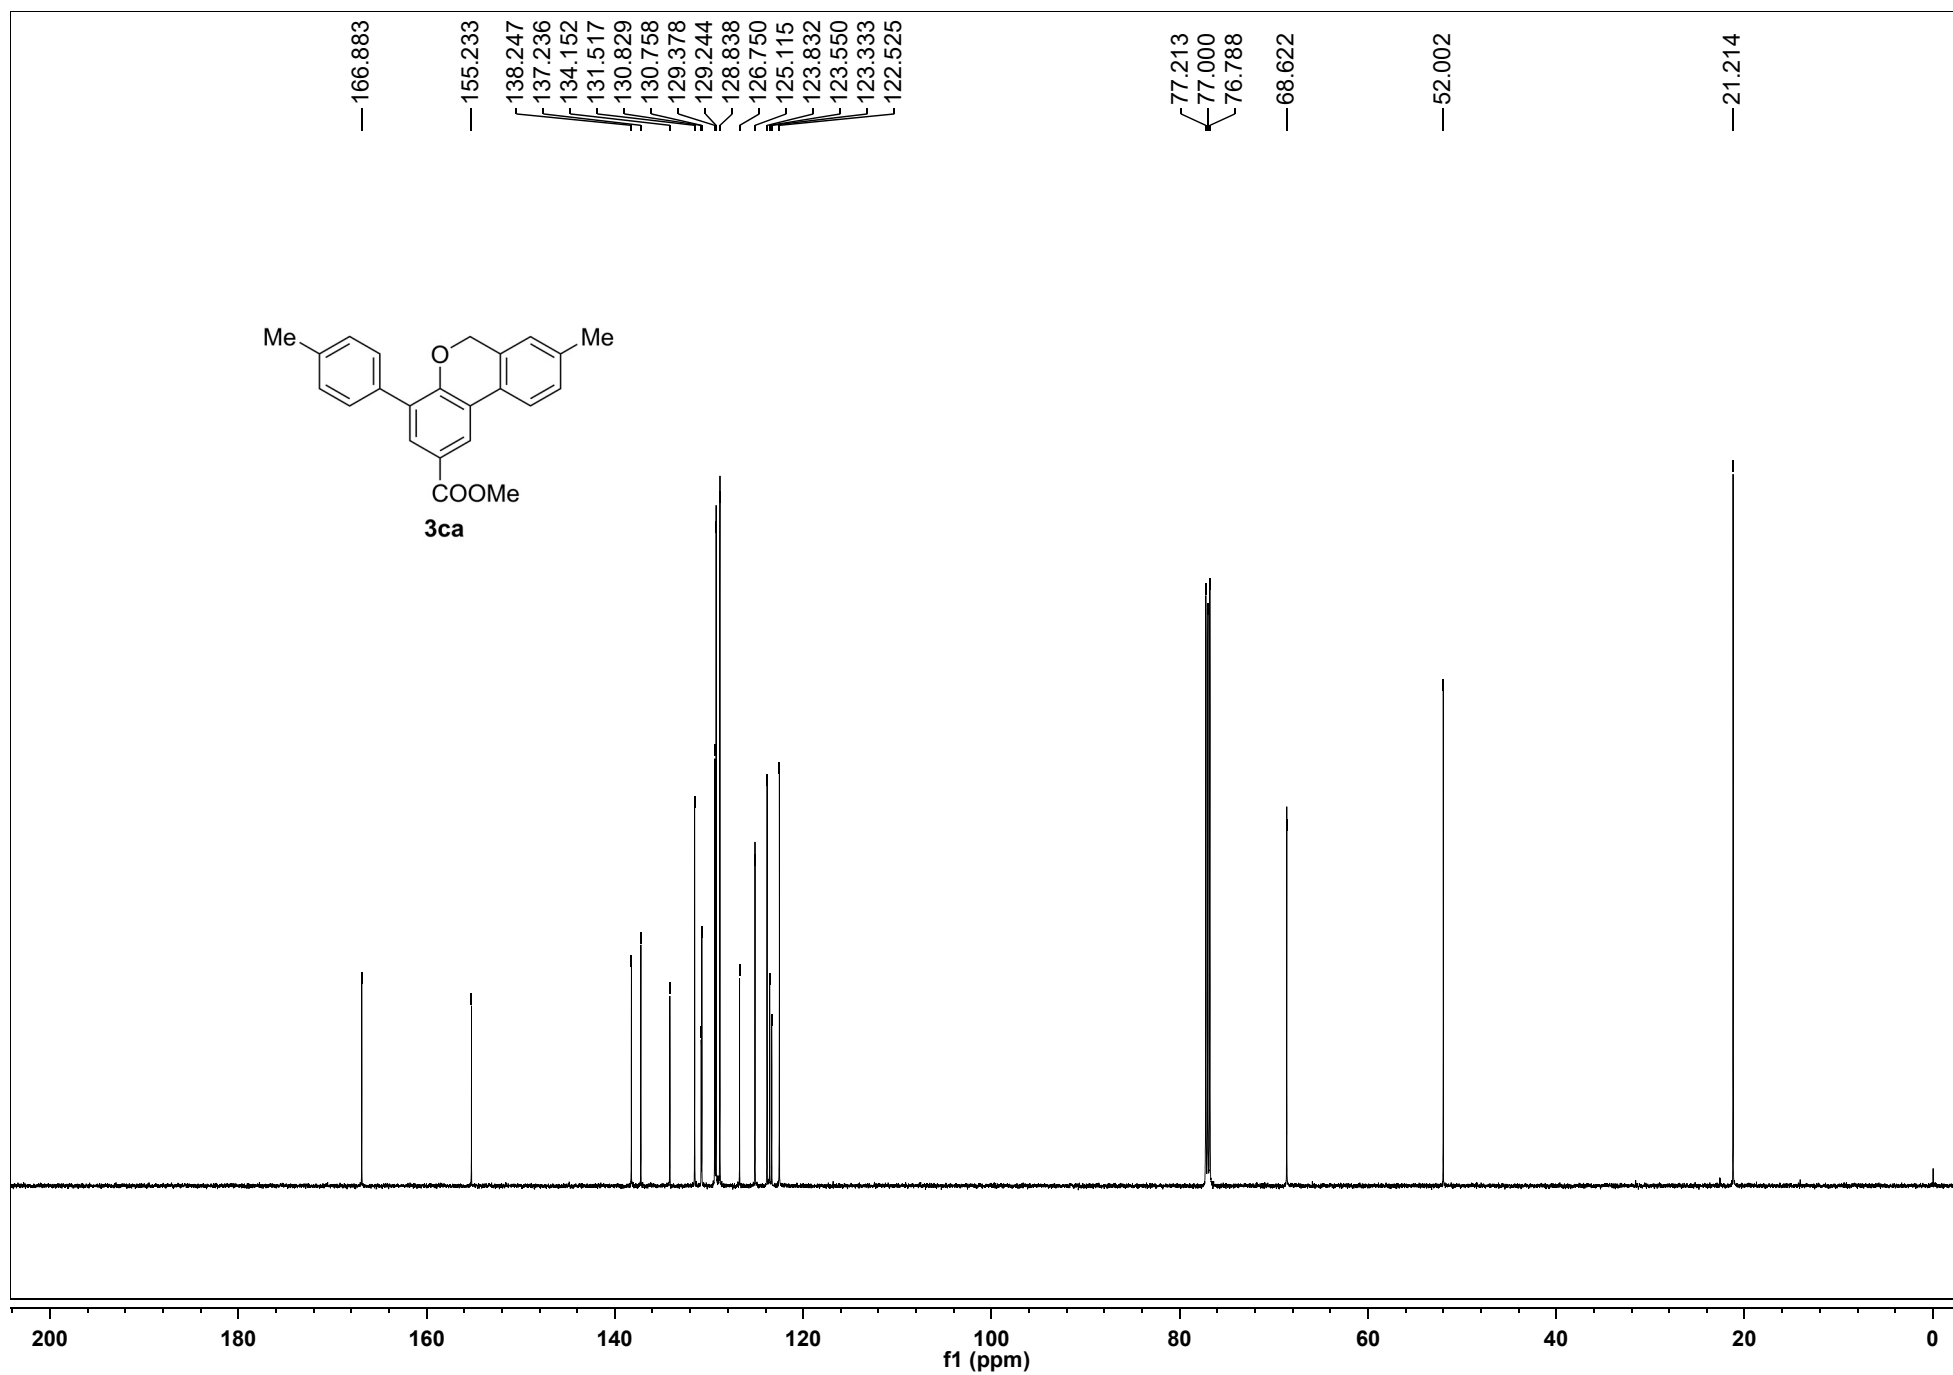

Figure S7. <sup>1</sup>H NMR spectrum (600 MHz, CDCl<sub>3</sub>) of 3da

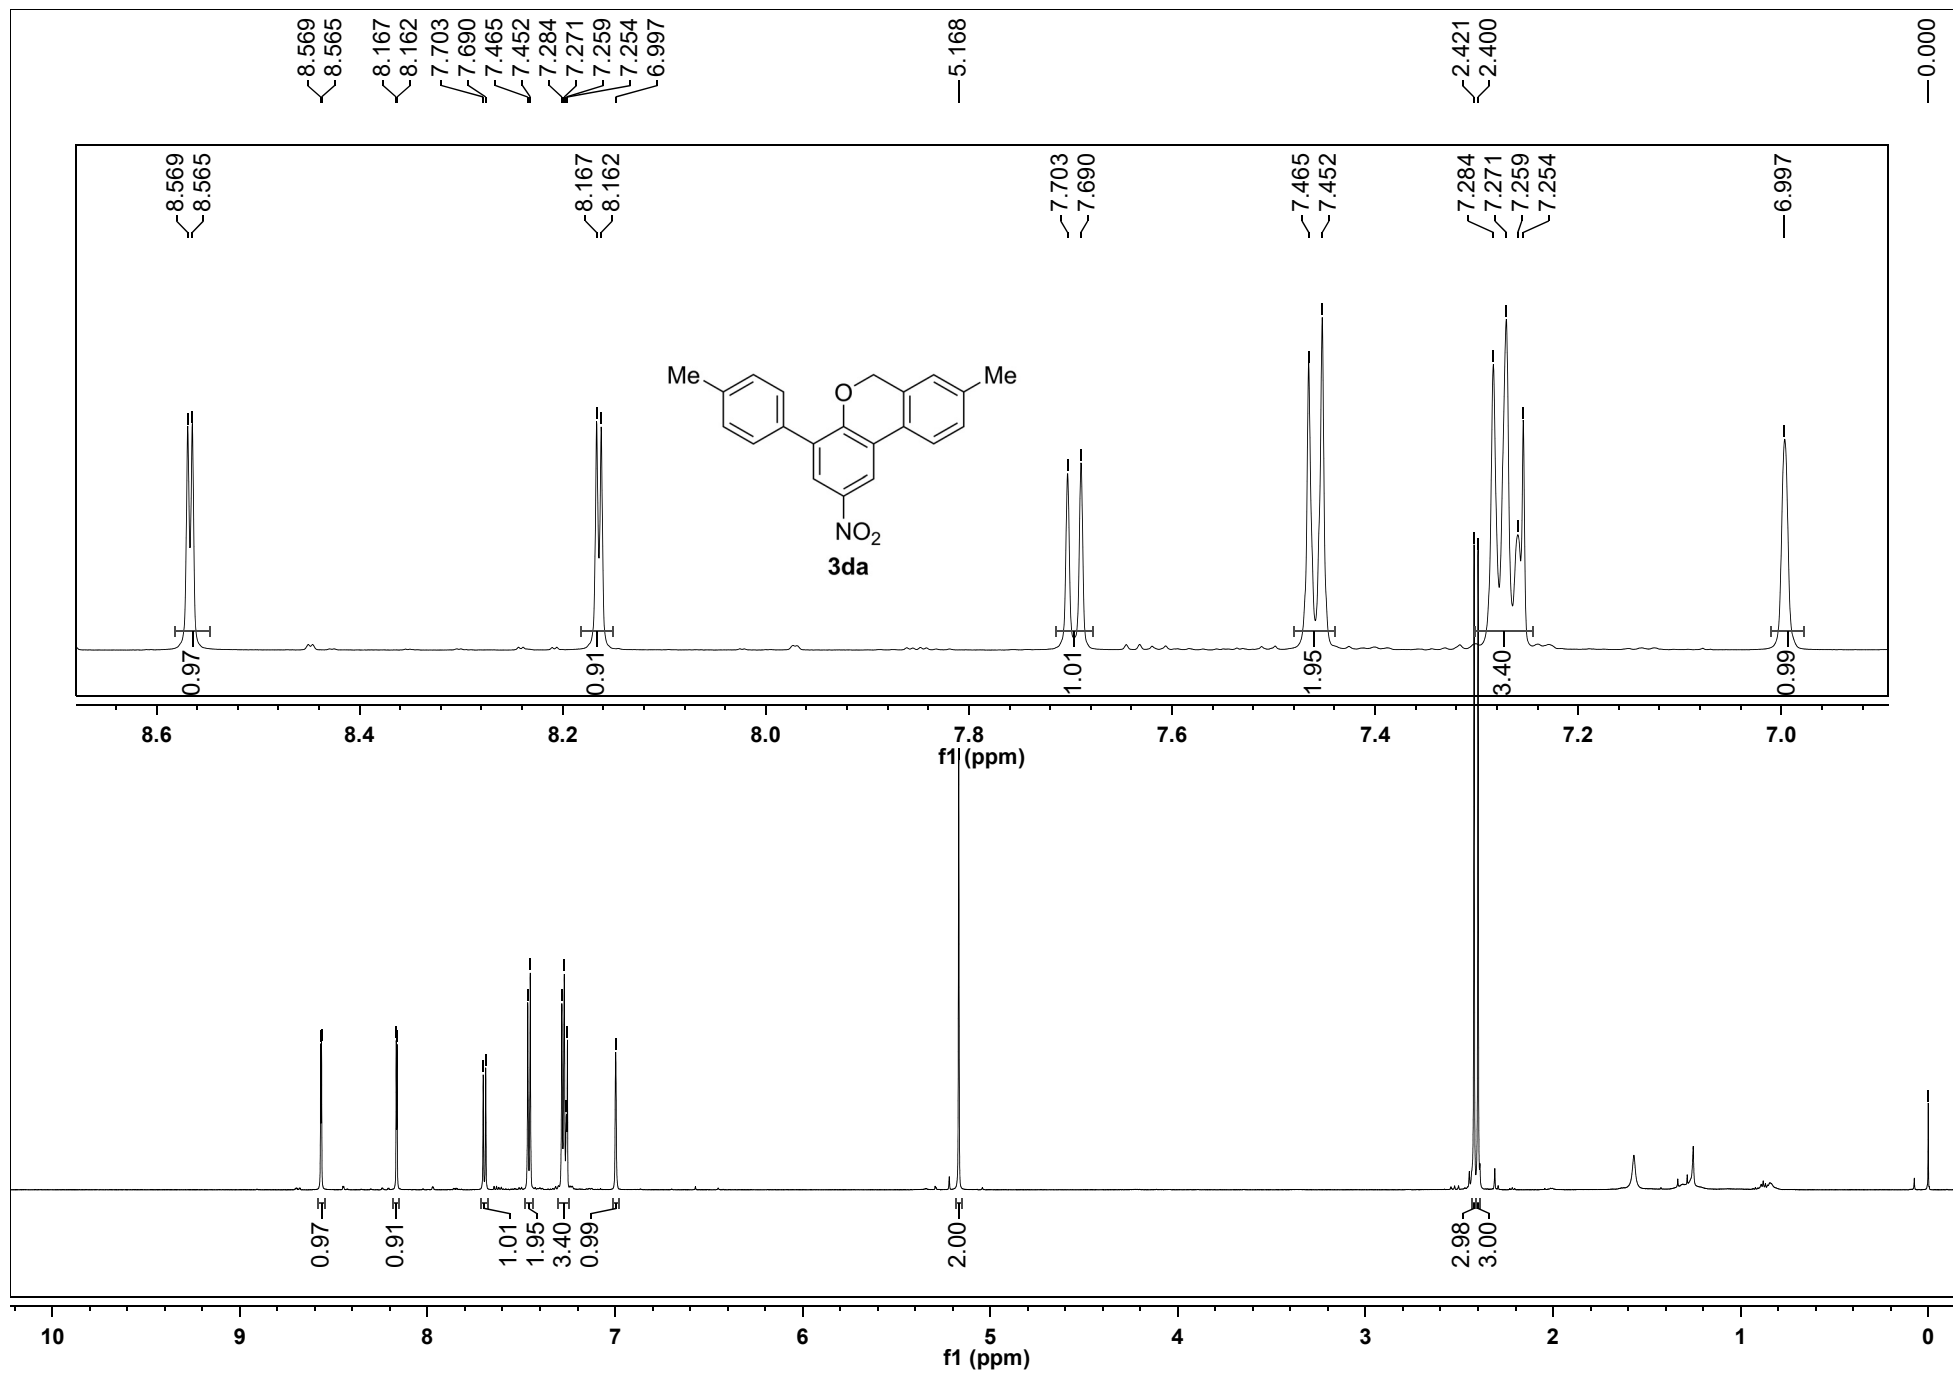

Figure S8.  $^{13}\text{C}\{^1\text{H}\}$  NMR spectrum (150 MHz,  $\text{CDCl}_3$ ) of 3da

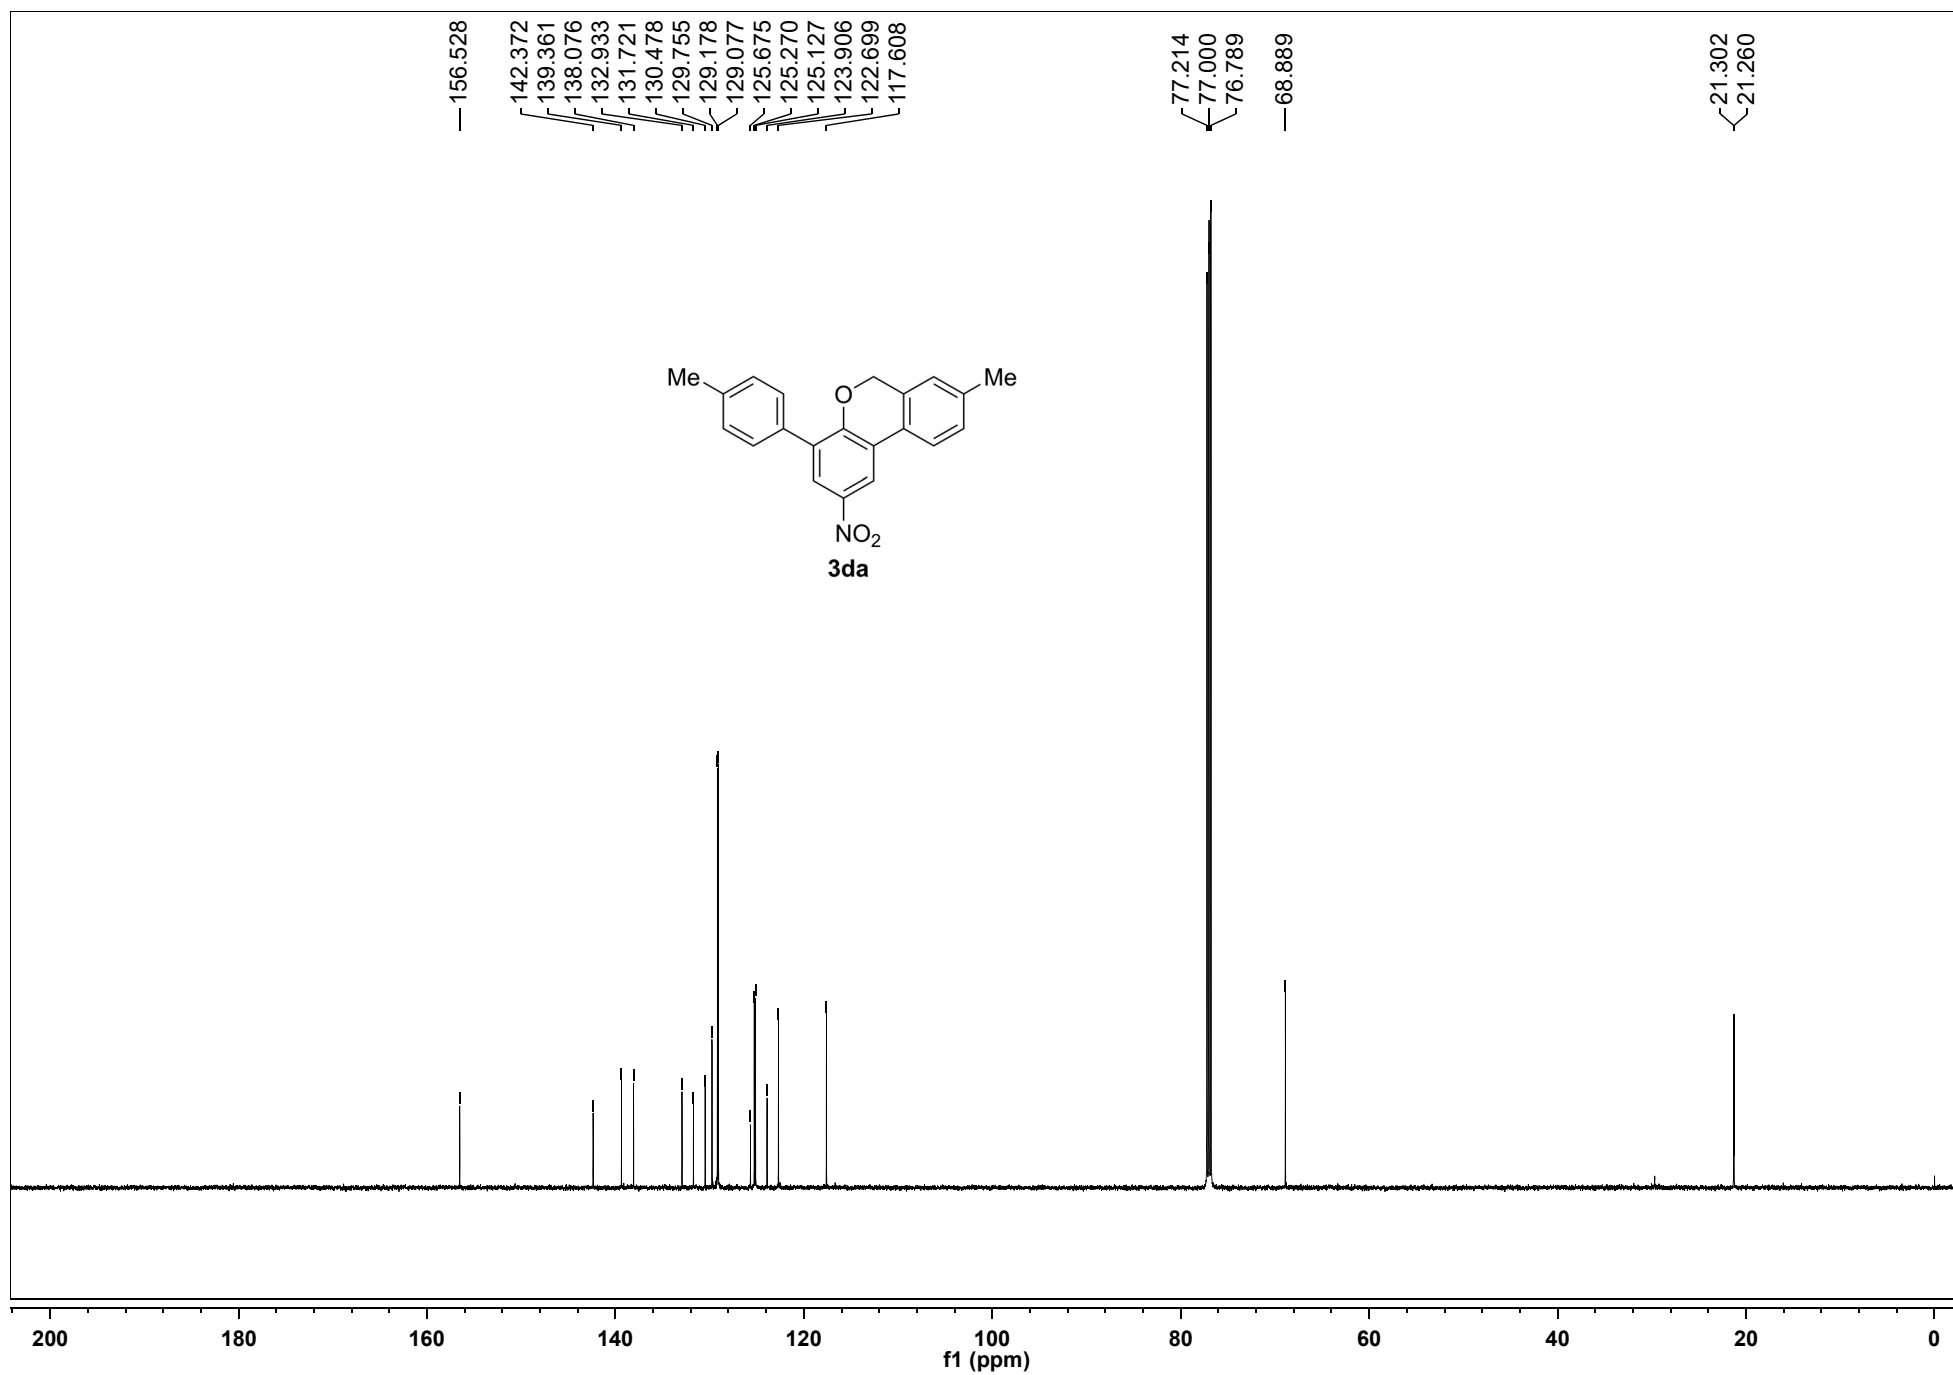



Figure S9. <sup>1</sup>H NMR spectrum (600 MHz, CDCl<sub>3</sub>) of 3ea

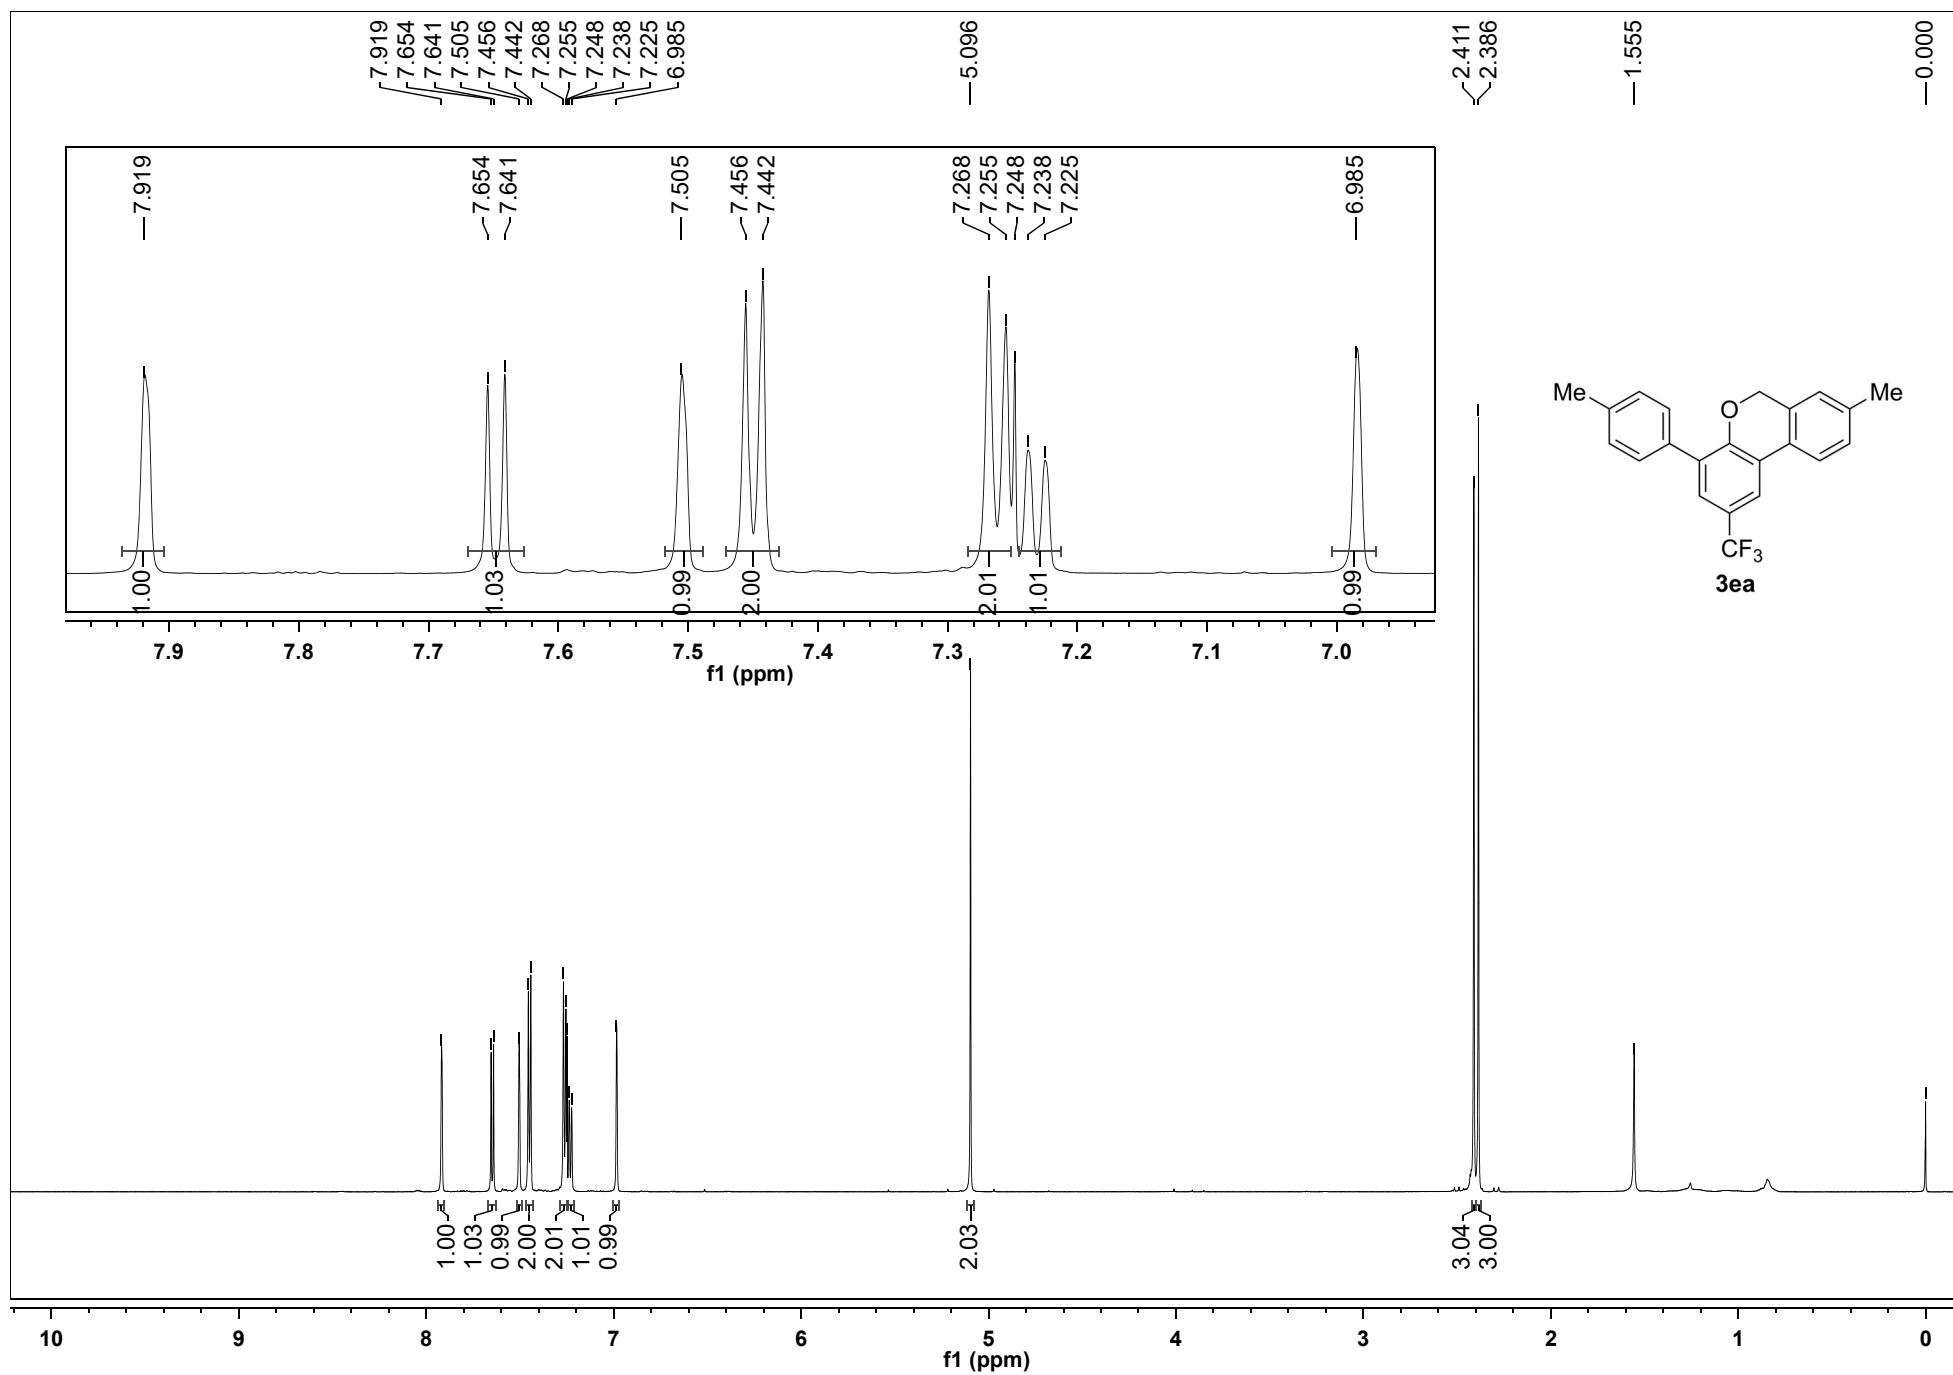

Figure S10.  $^{13}\text{C}\{^1\text{H}\}$  NMR spectrum (150 MHz,  $\text{CDCl}_3$ ) of 3ea

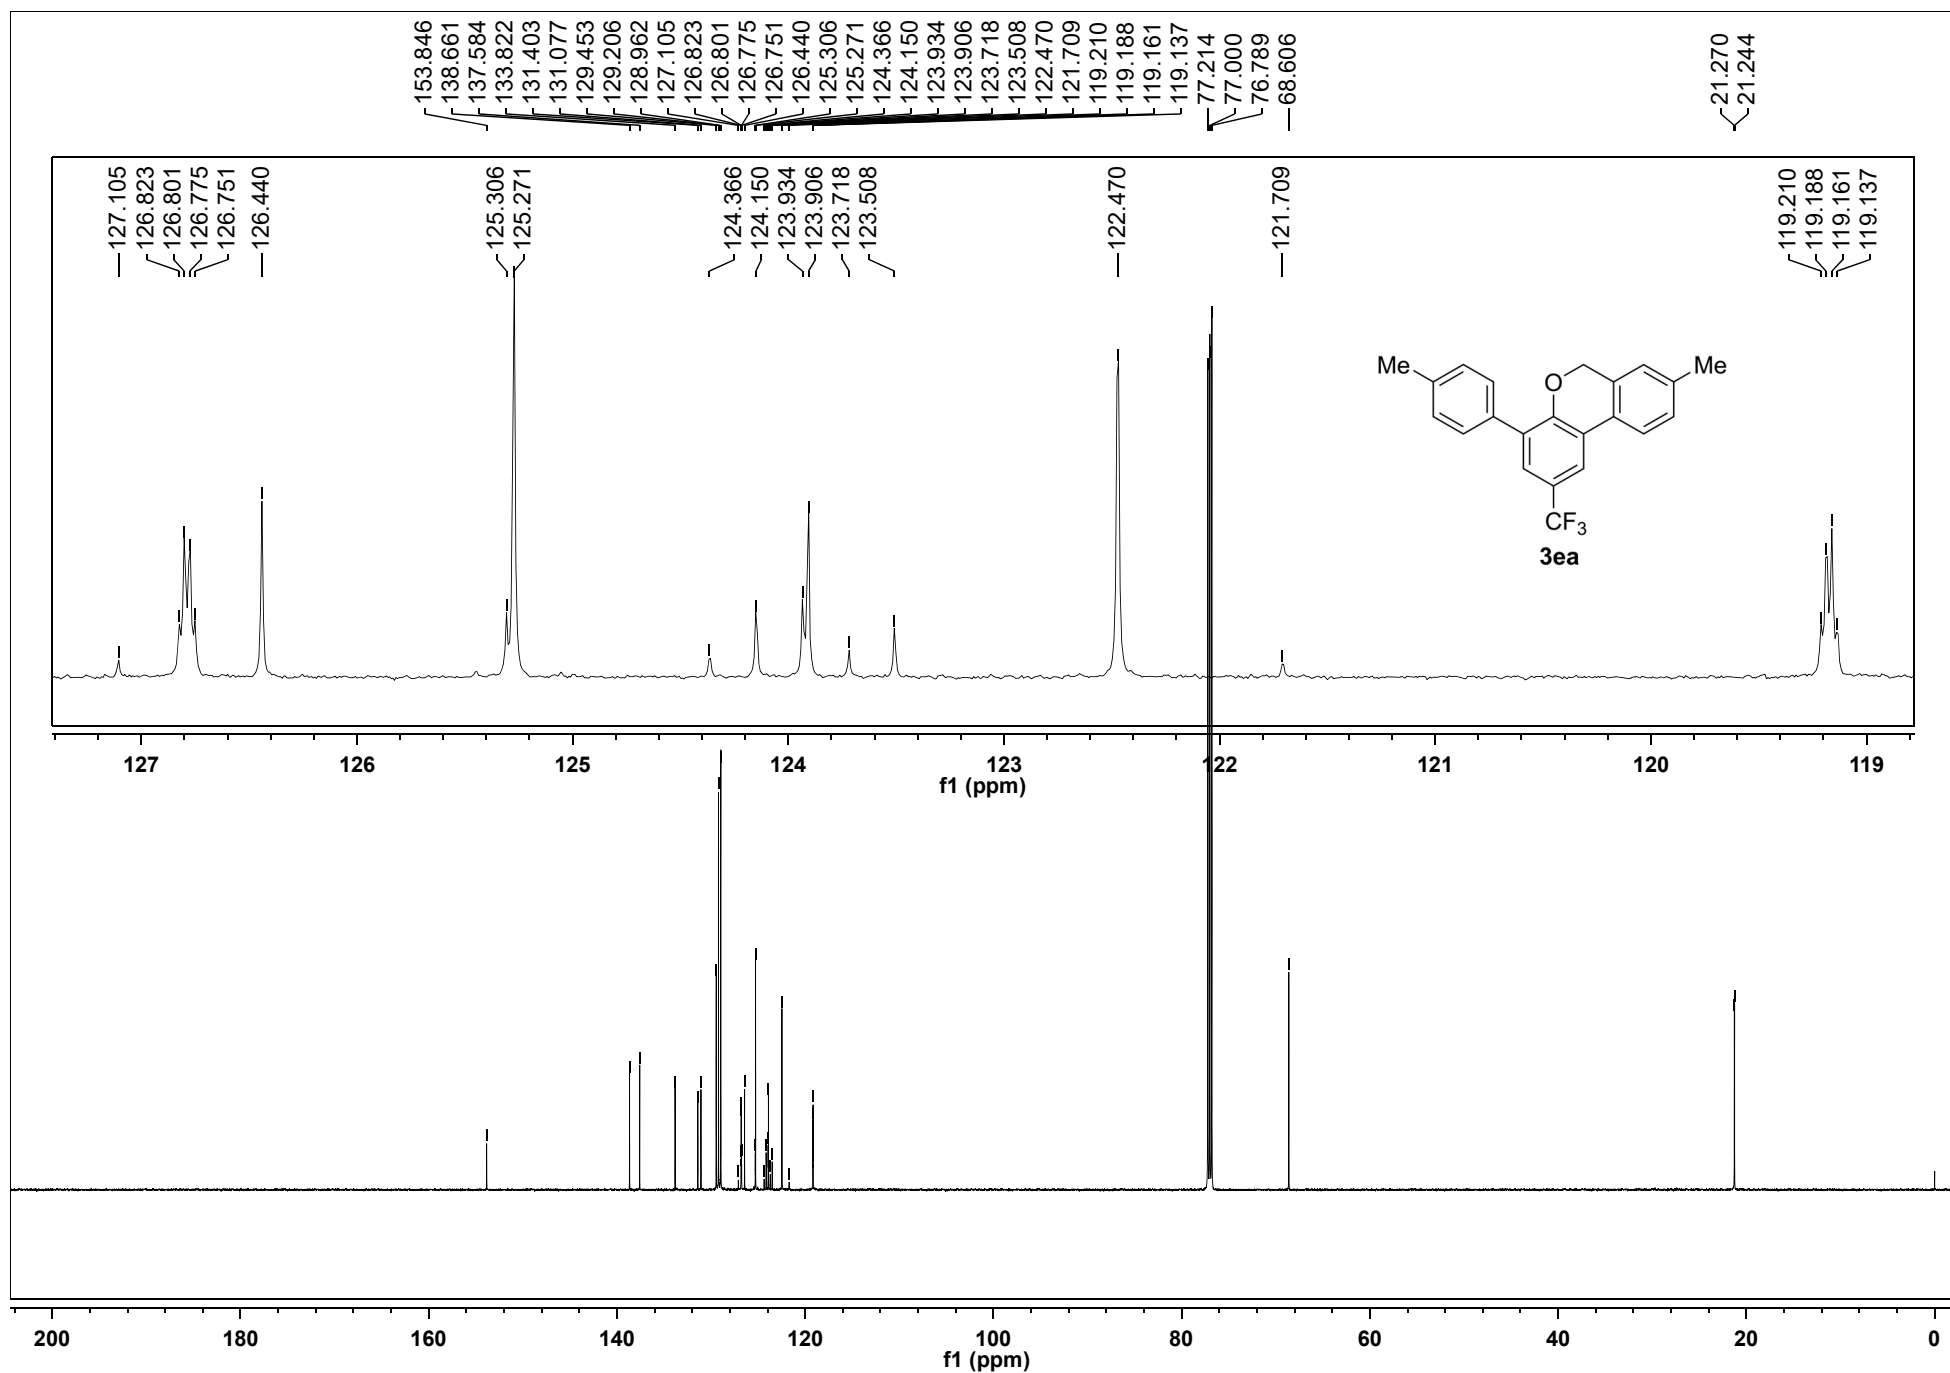

Figure S11. <sup>1</sup>H NMR spectrum (600 MHz, CDCl<sub>3</sub>) of 3fa

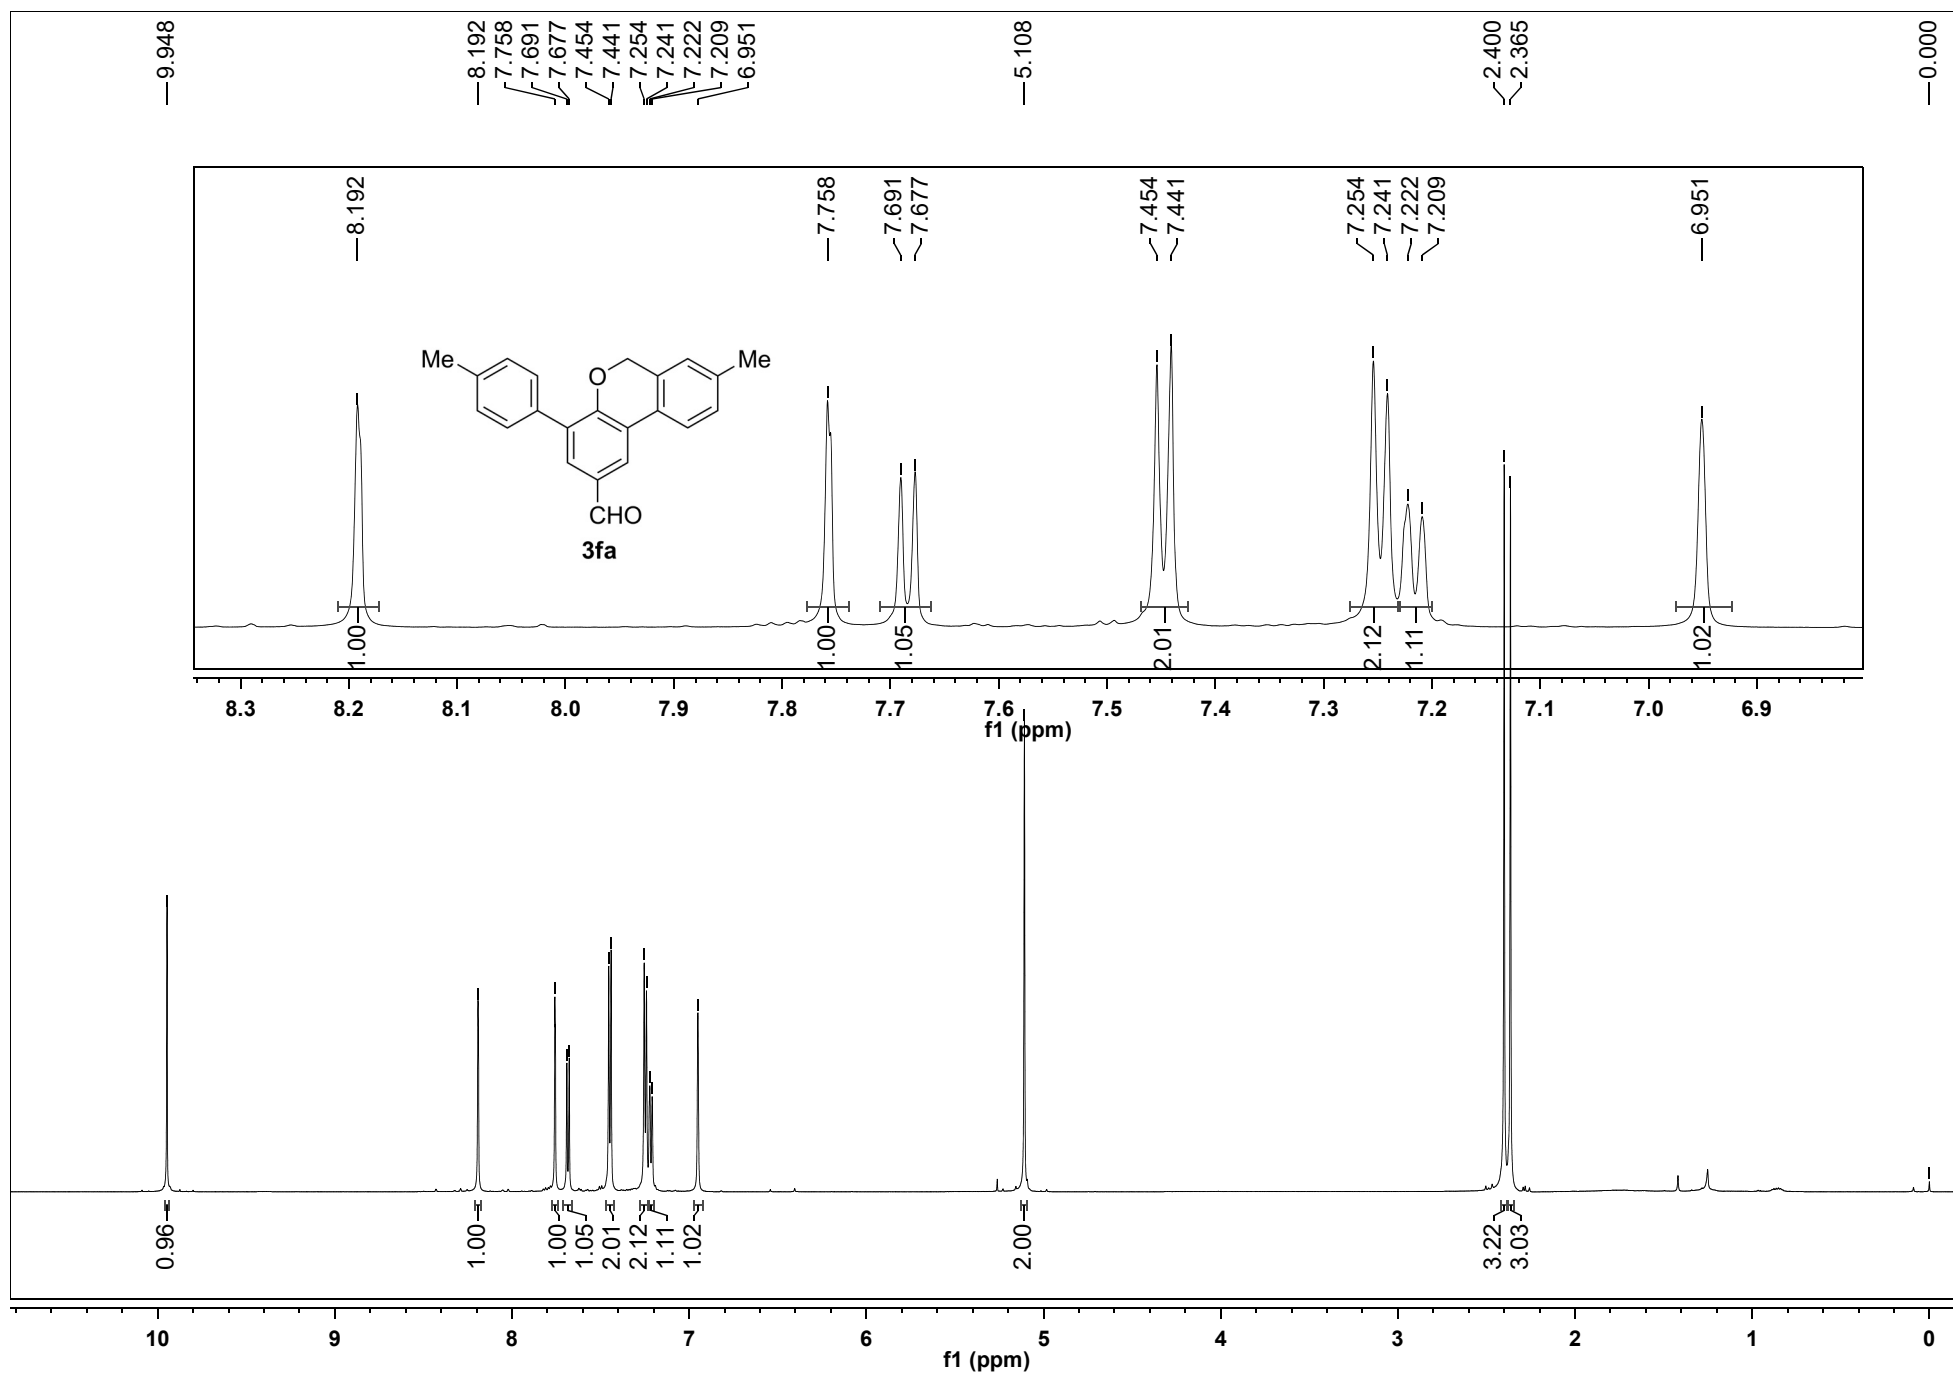

Figure S12.  $^{13}\text{C}\{^1\text{H}\}$  NMR spectrum (150 MHz,  $\text{CDCl}_3$ ) of 3fa

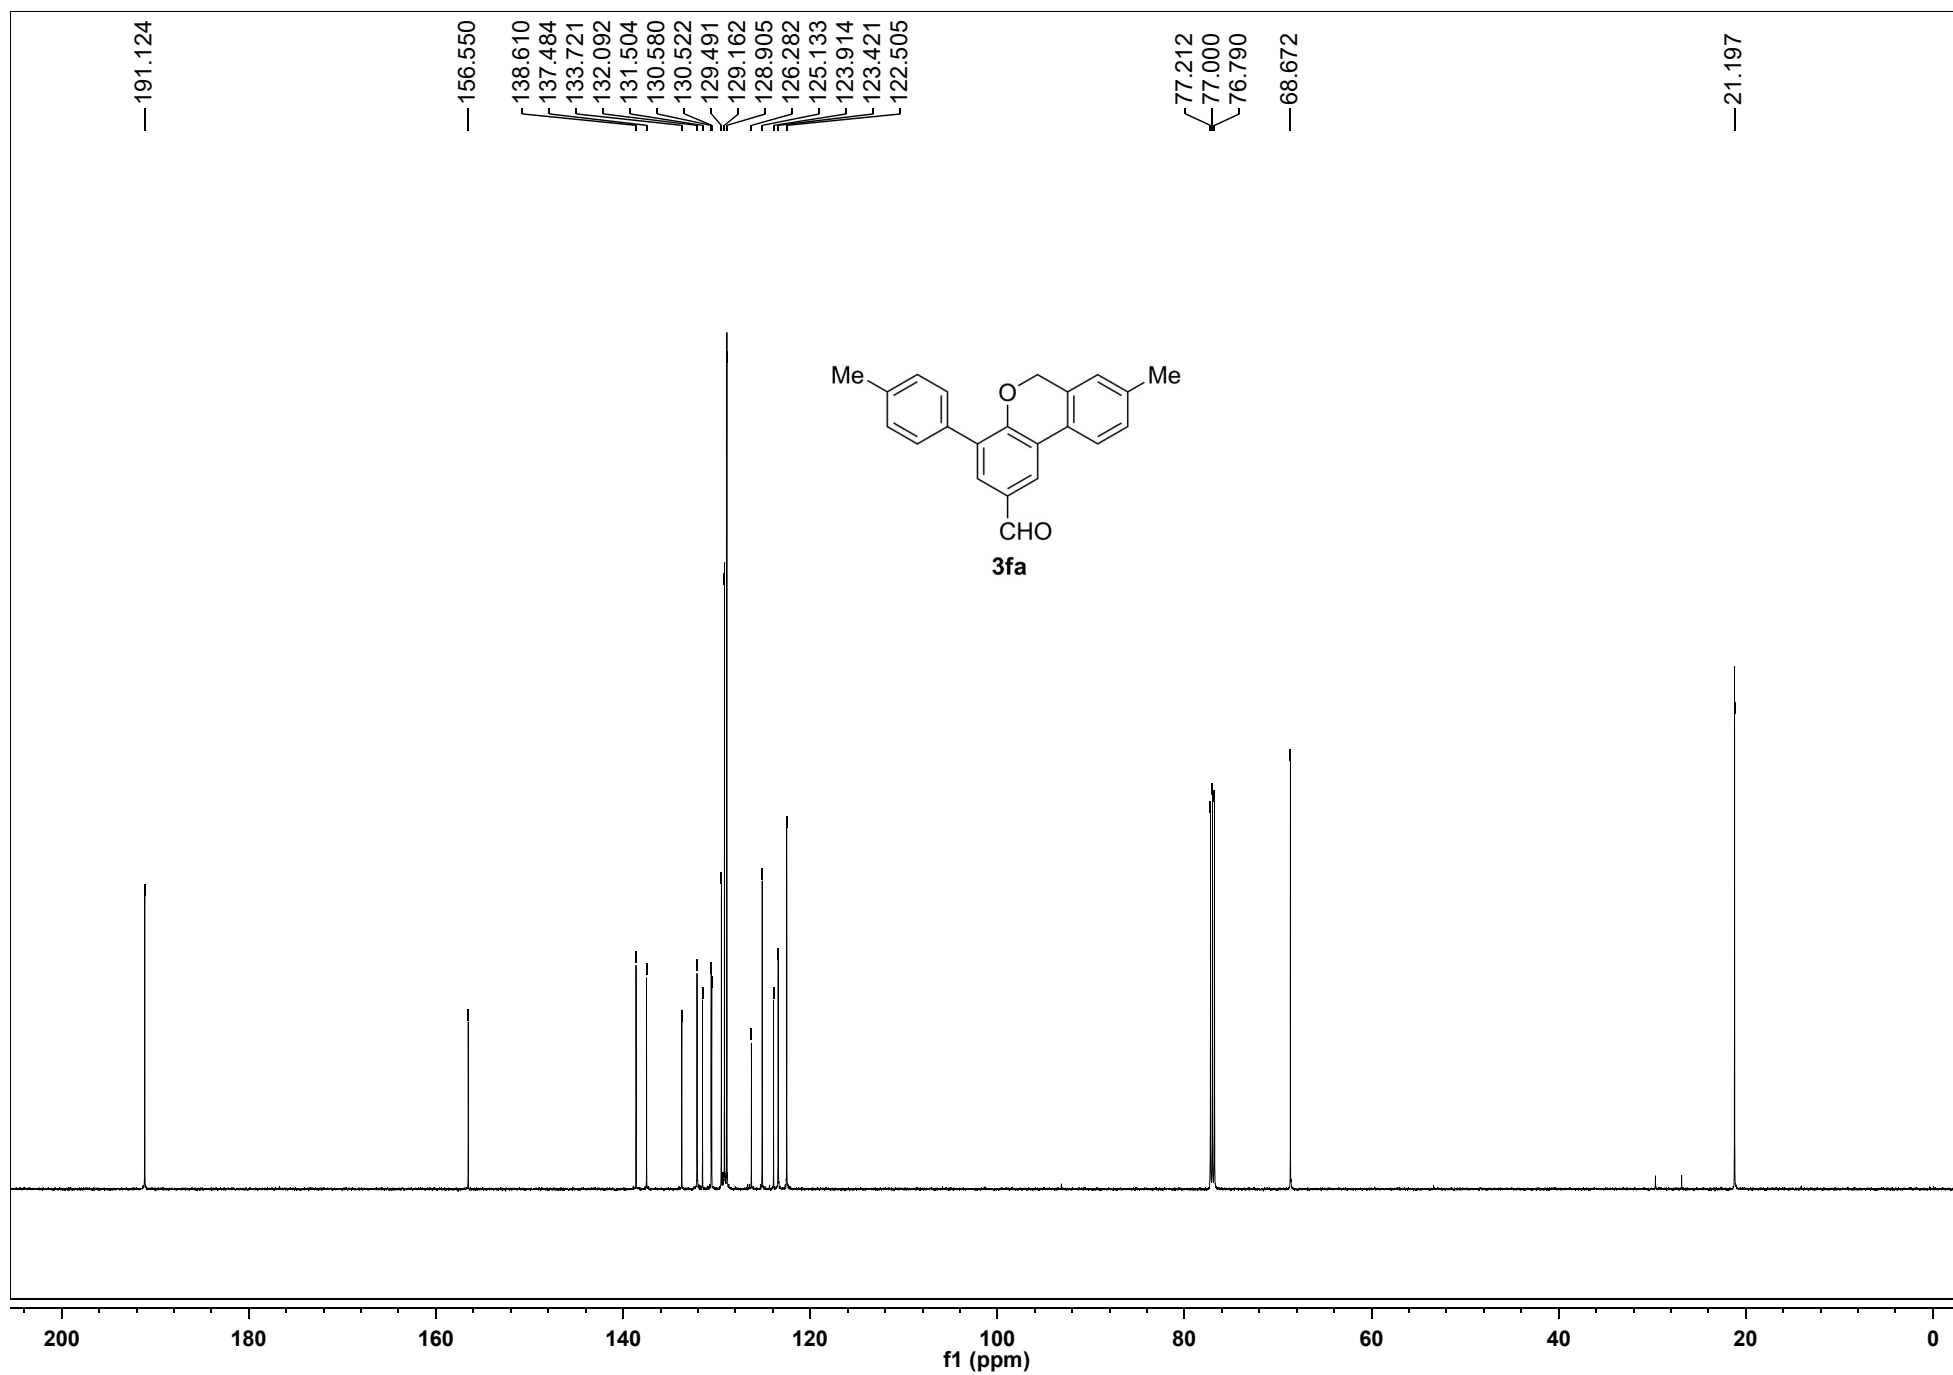

Figure S13. <sup>1</sup>H NMR spectrum (600 MHz, CDCl<sub>3</sub>) of 3ga

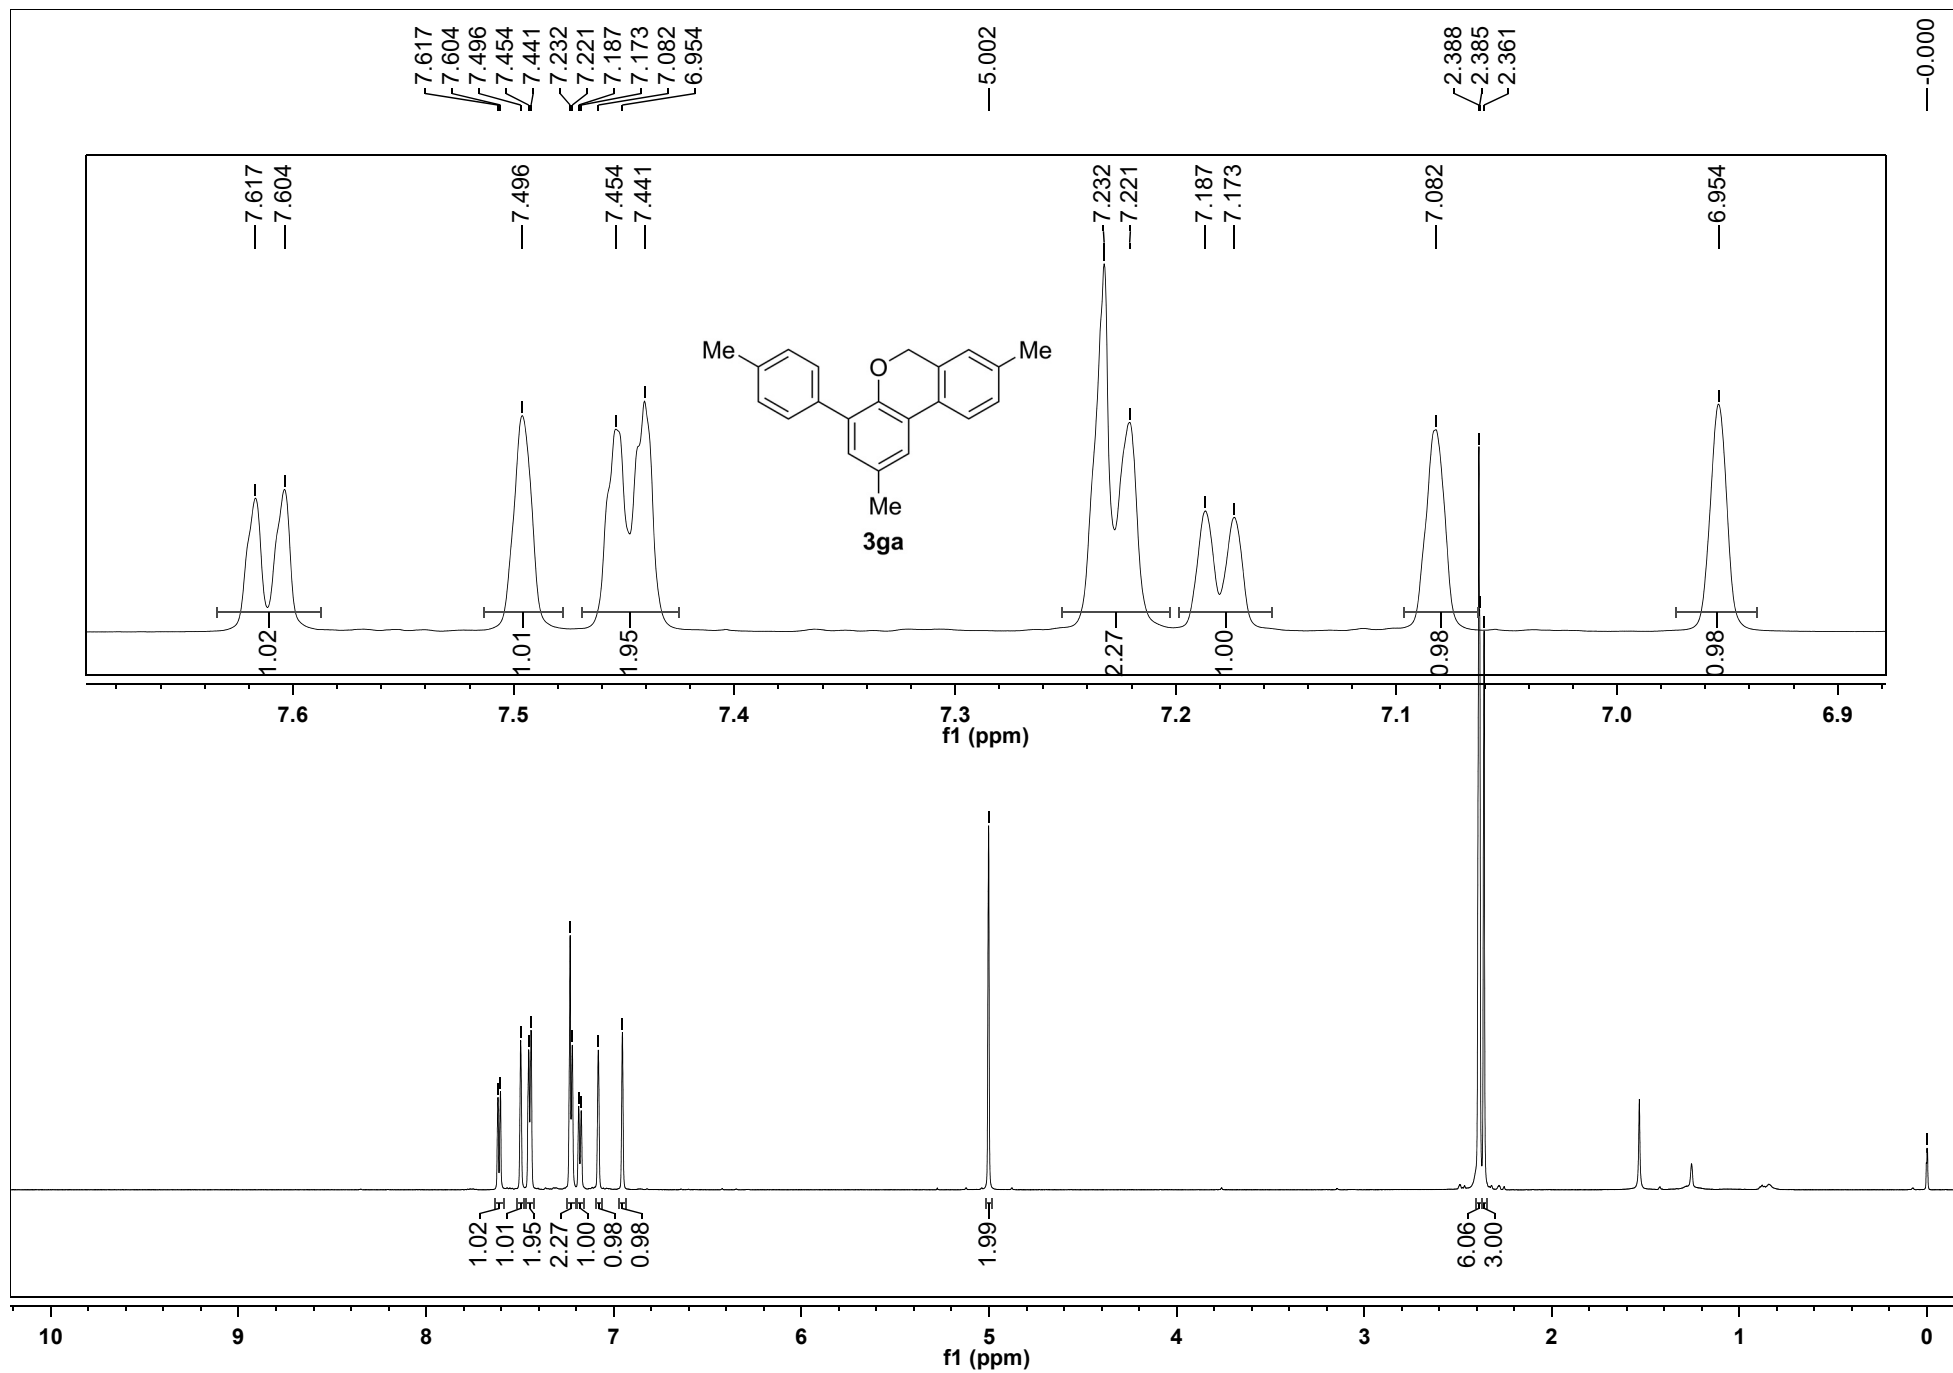

Figure S14.  $^{13}\text{C}\{^1\text{H}\}$  NMR spectrum (150 MHz,  $\text{CDCl}_3$ ) of 3ga

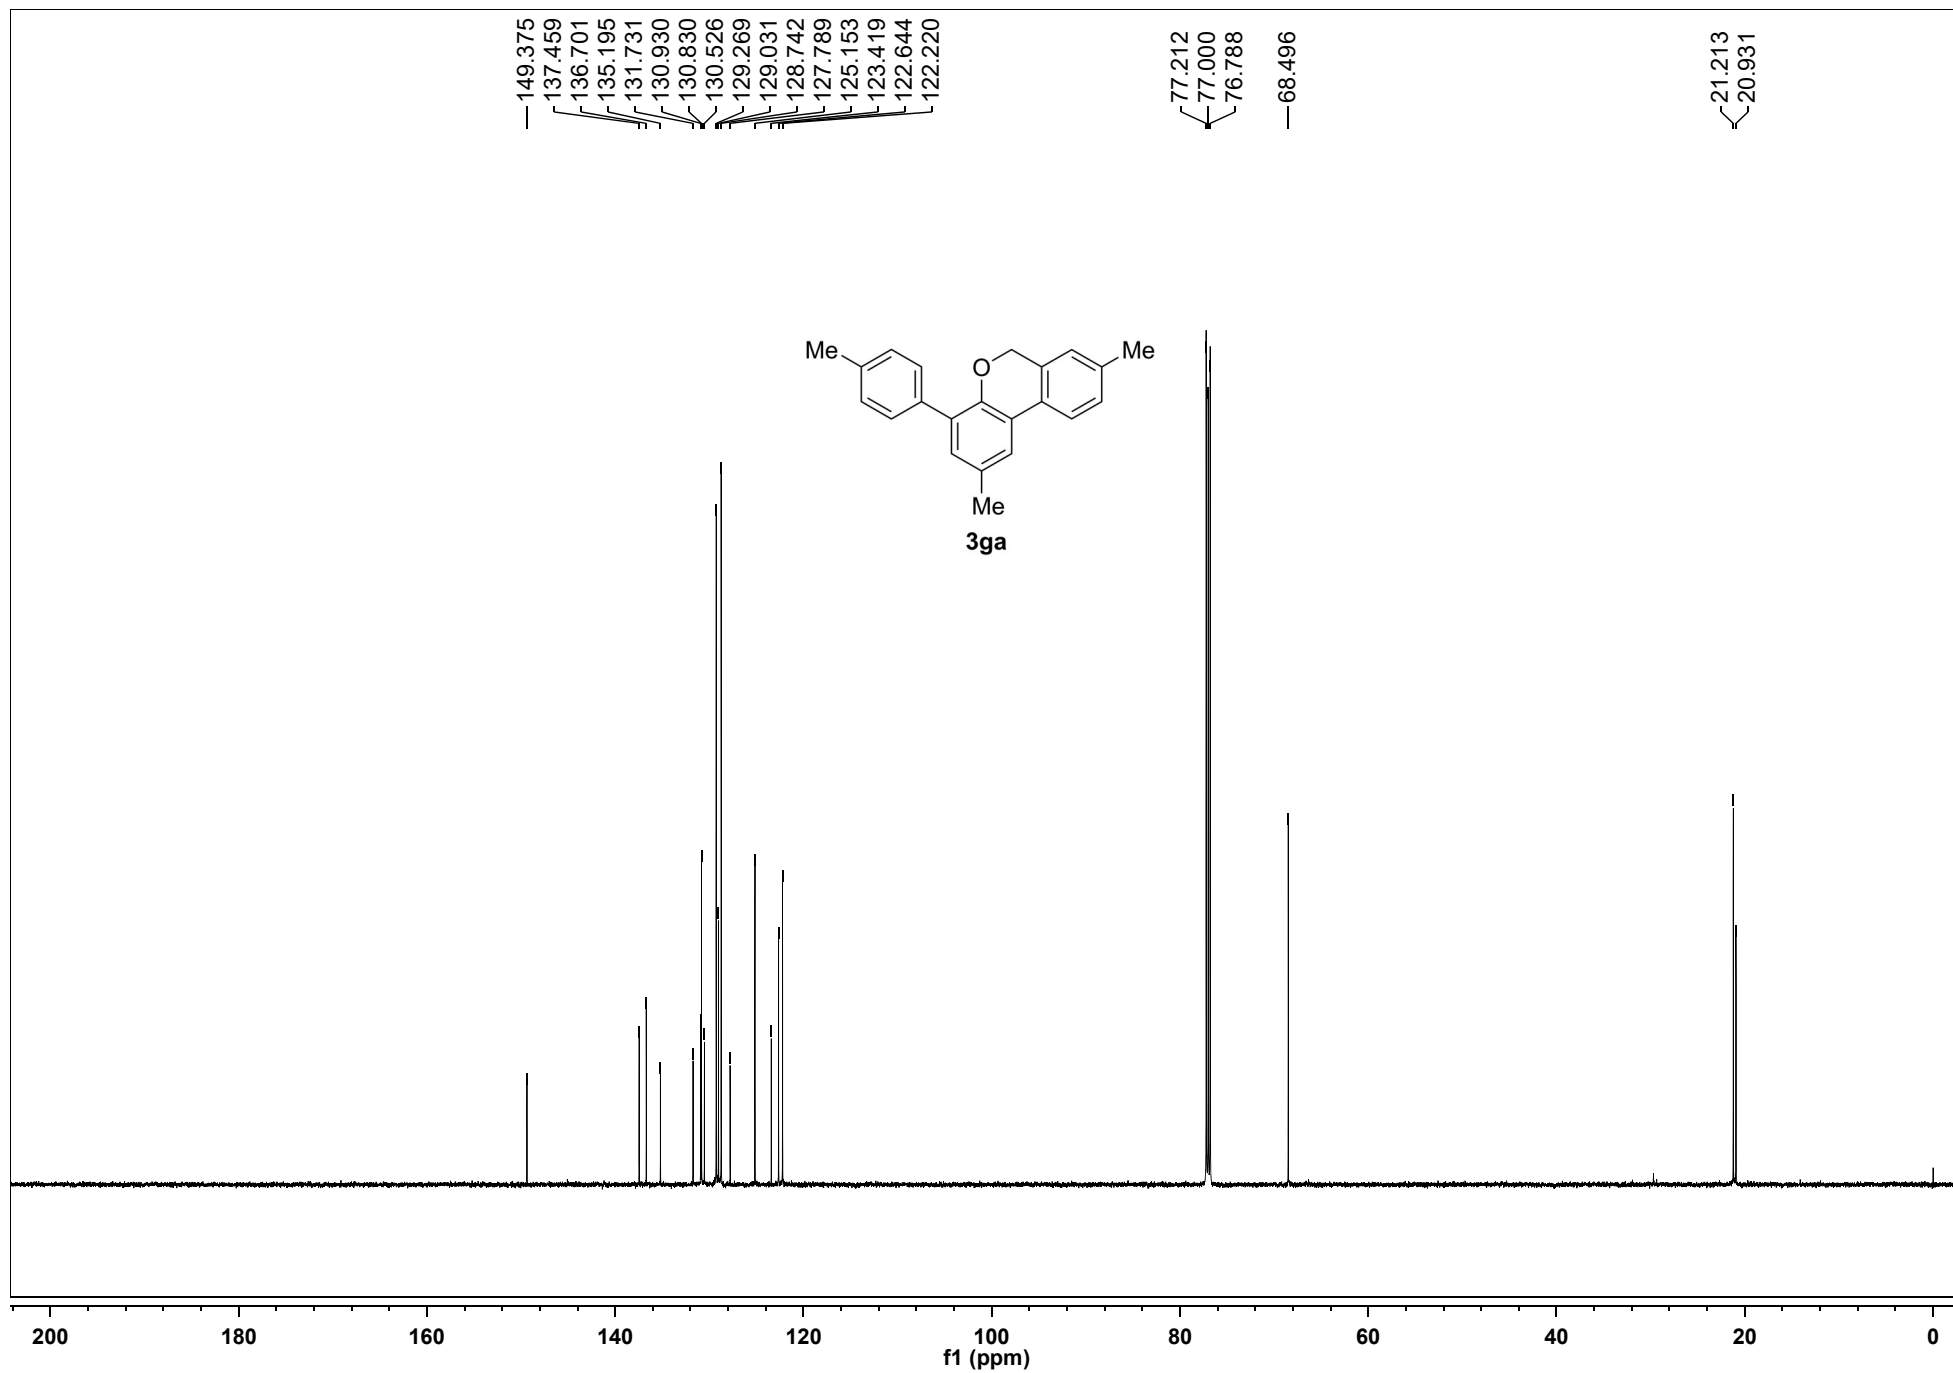

Figure S15. <sup>1</sup>H NMR spectrum (600 MHz, CDCl<sub>3</sub>) of 3ha

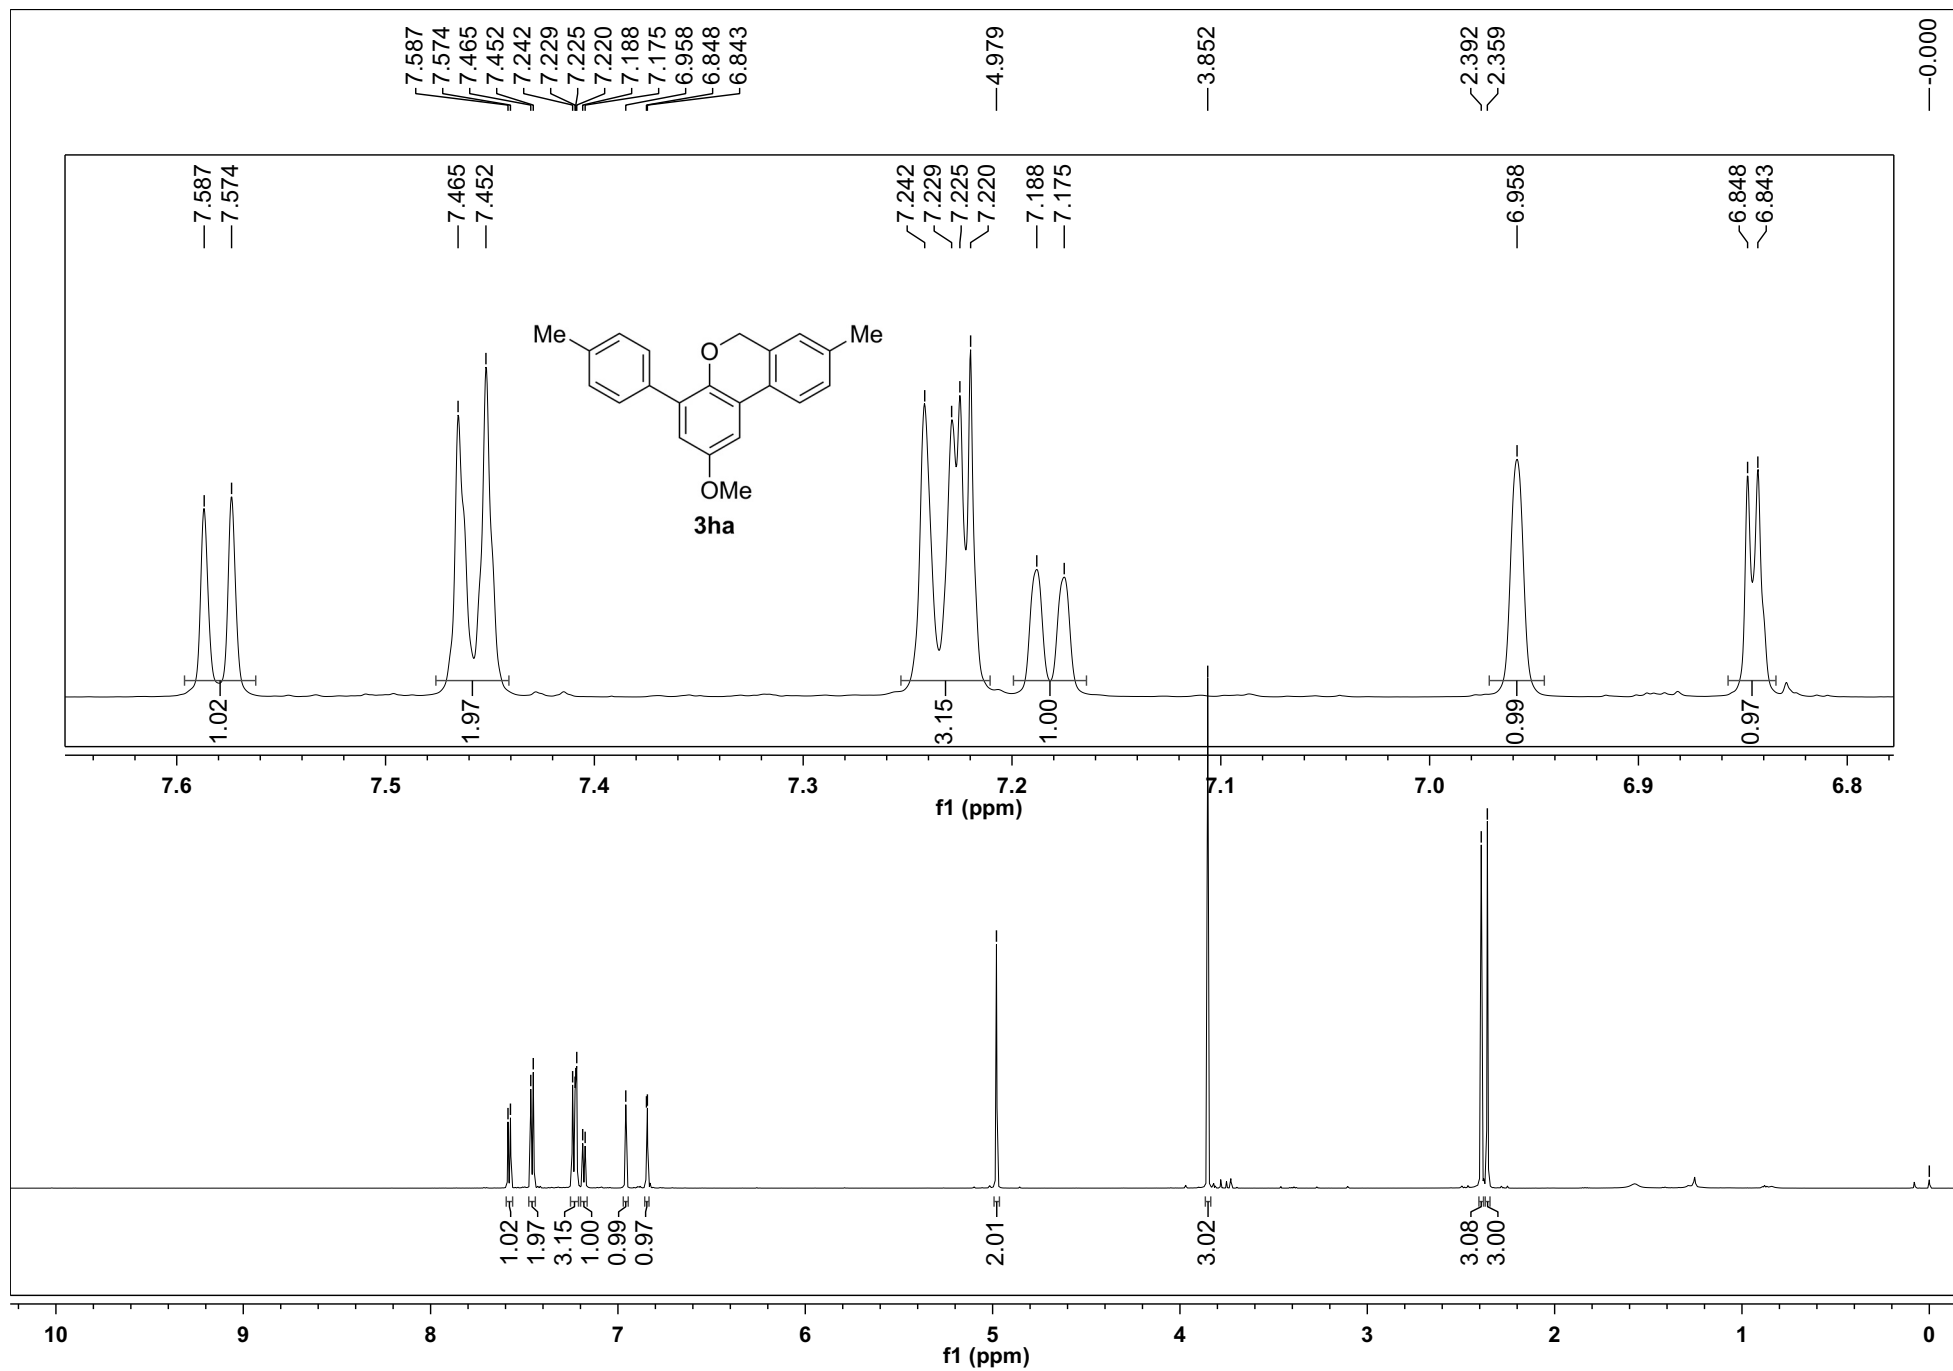

Figure S16.  $^{13}\text{C}\{^1\text{H}\}$  NMR spectrum (150 MHz,  $\text{CDCl}_3$ ) of 3ha

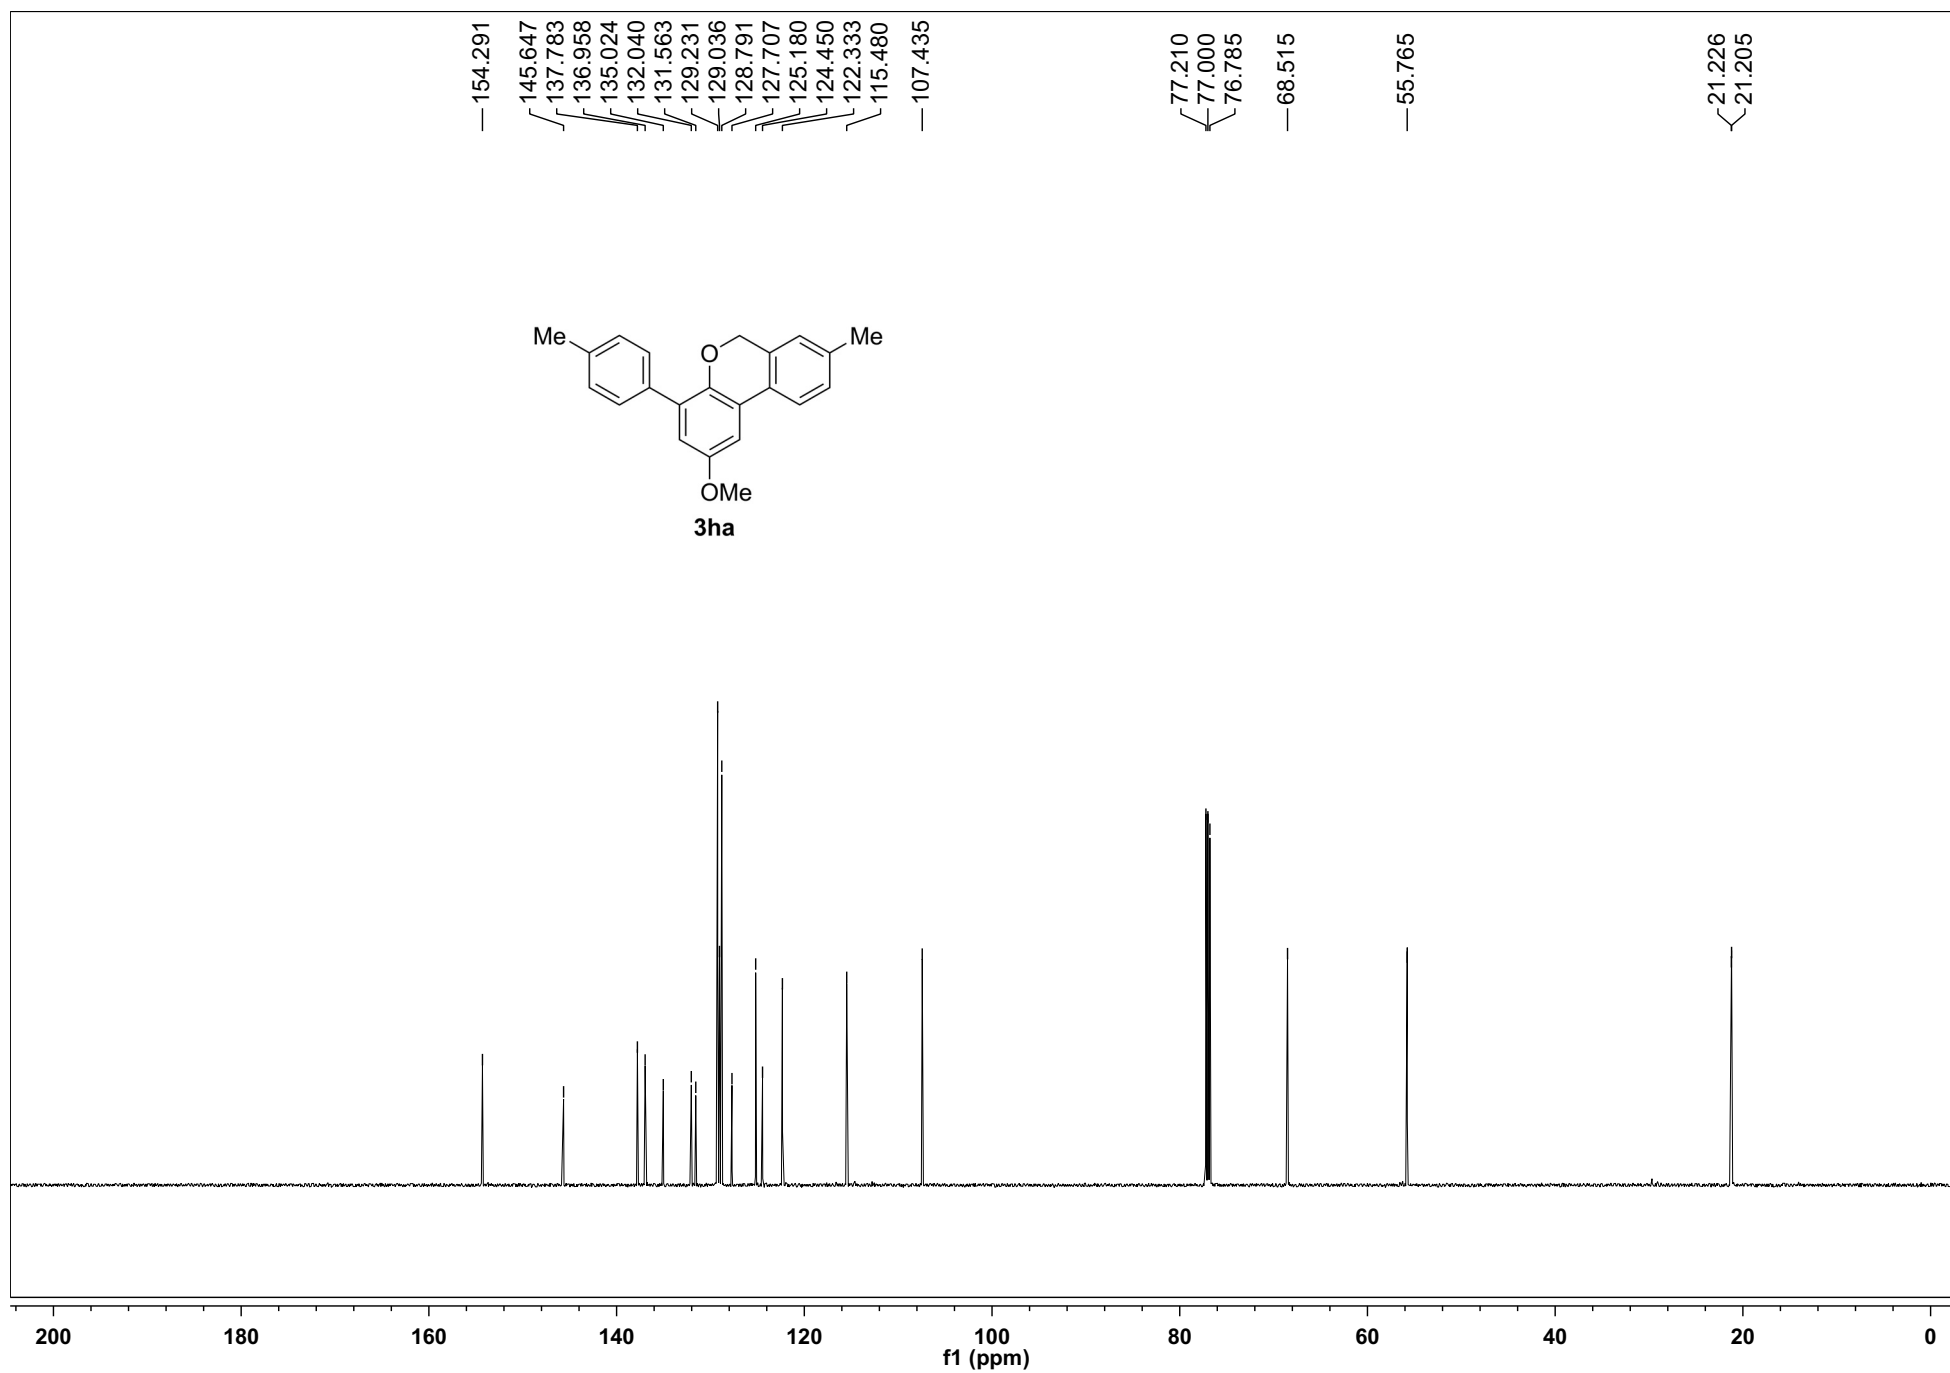



Figure S17. <sup>1</sup>H NMR spectrum (600 MHz, CDCl<sub>3</sub>) of 3ia

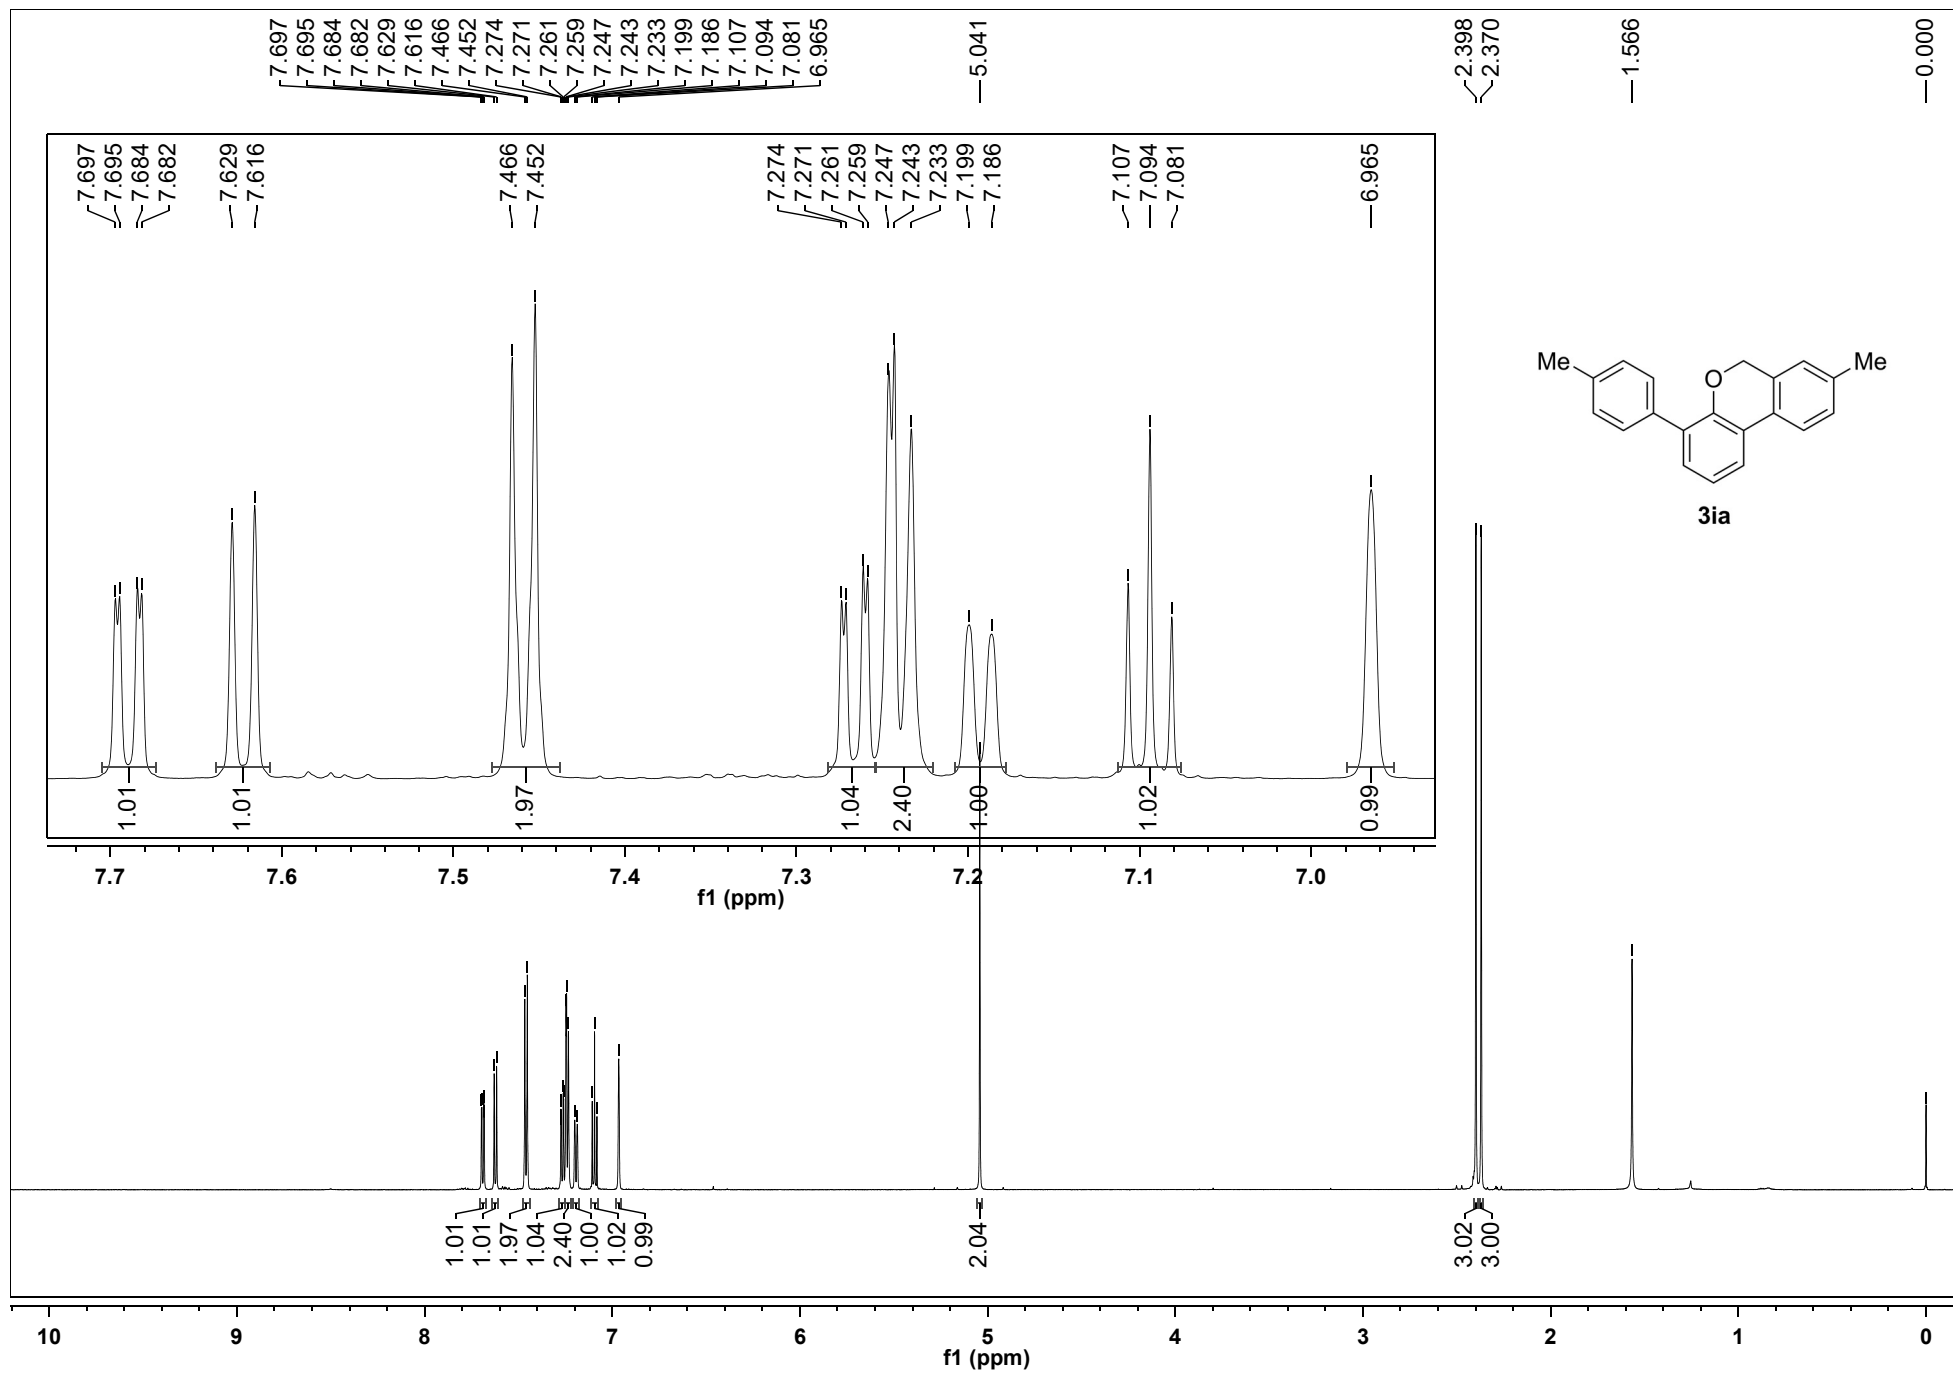

Figure S18.  $^{13}\text{C}\{^1\text{H}\}$  NMR spectrum (150 MHz,  $\text{CDCl}_3$ ) of 3ia

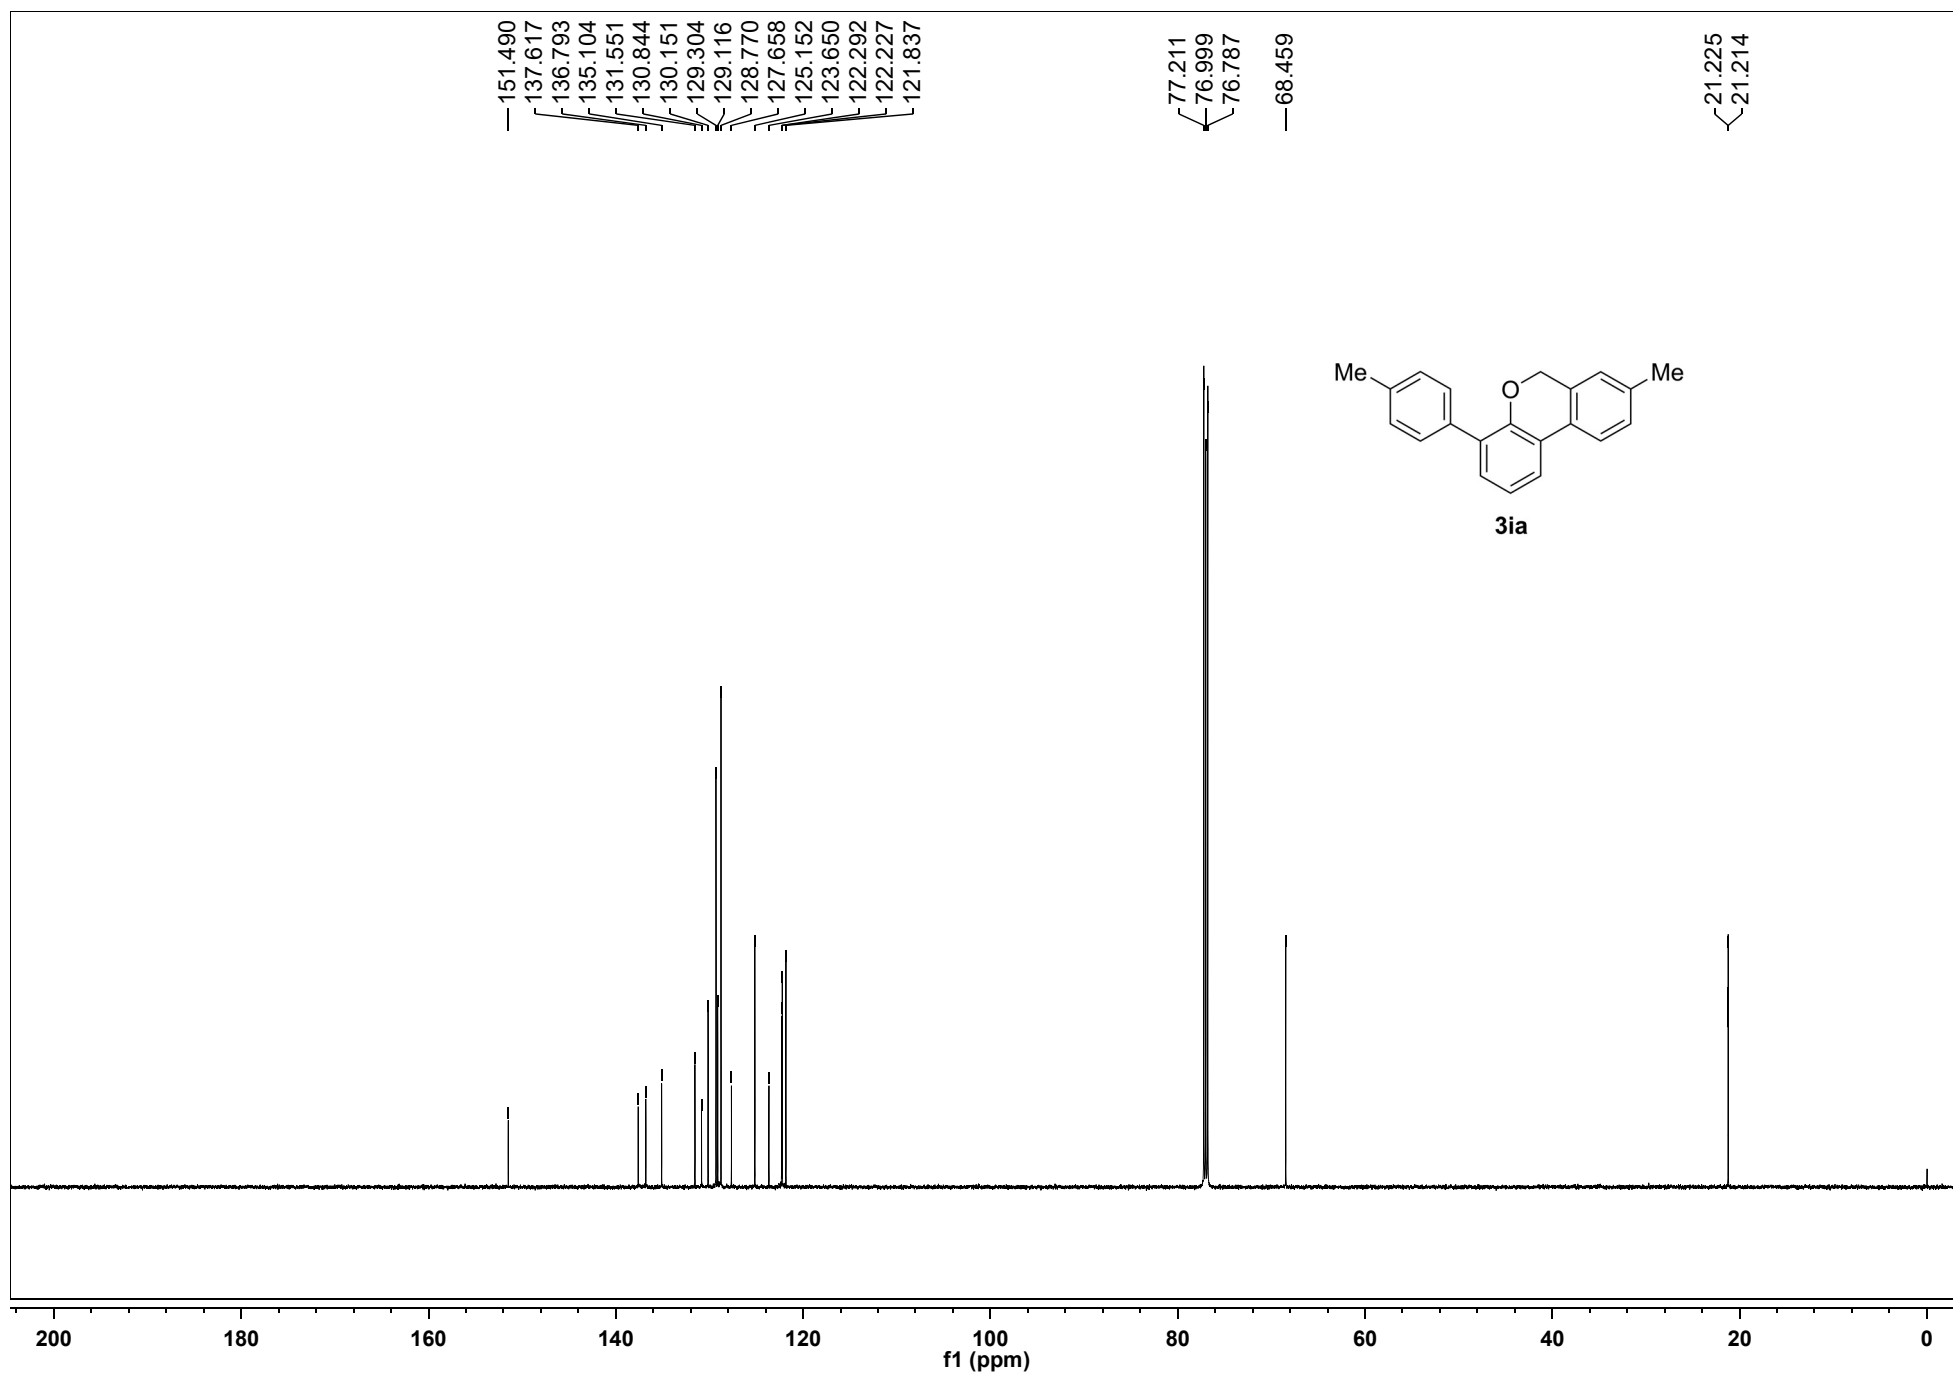

Figure S19. <sup>1</sup>H NMR spectrum (600 MHz, CDCl<sub>3</sub>) of 3ia-D

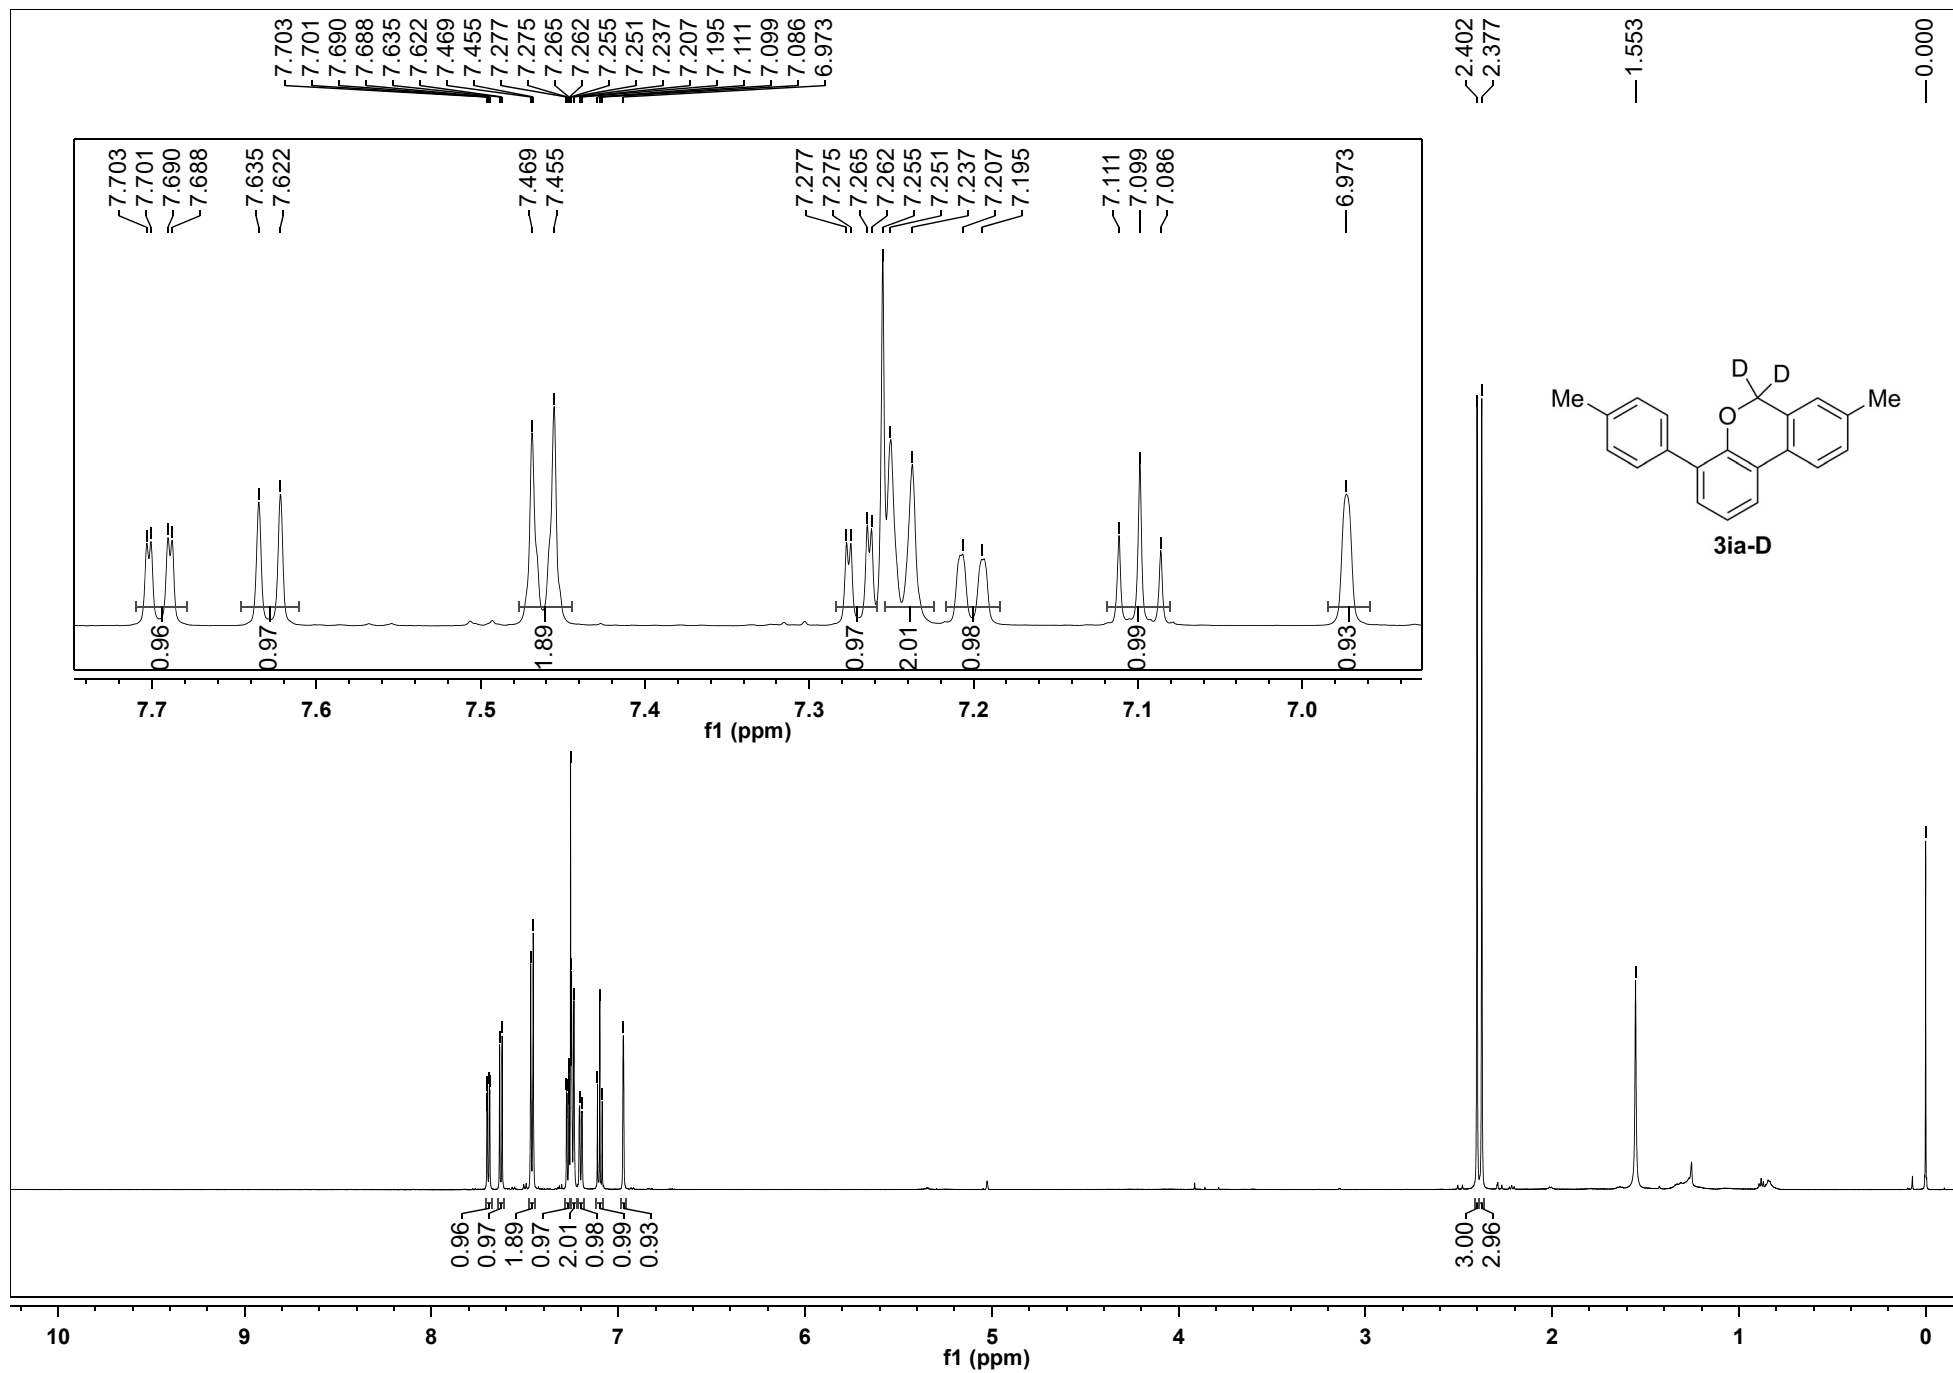

Figure S20.  $^{13}\text{C}\{^1\text{H}\}$  NMR spectrum (150 MHz,  $\text{CDCl}_3$ ) of 3ia-D

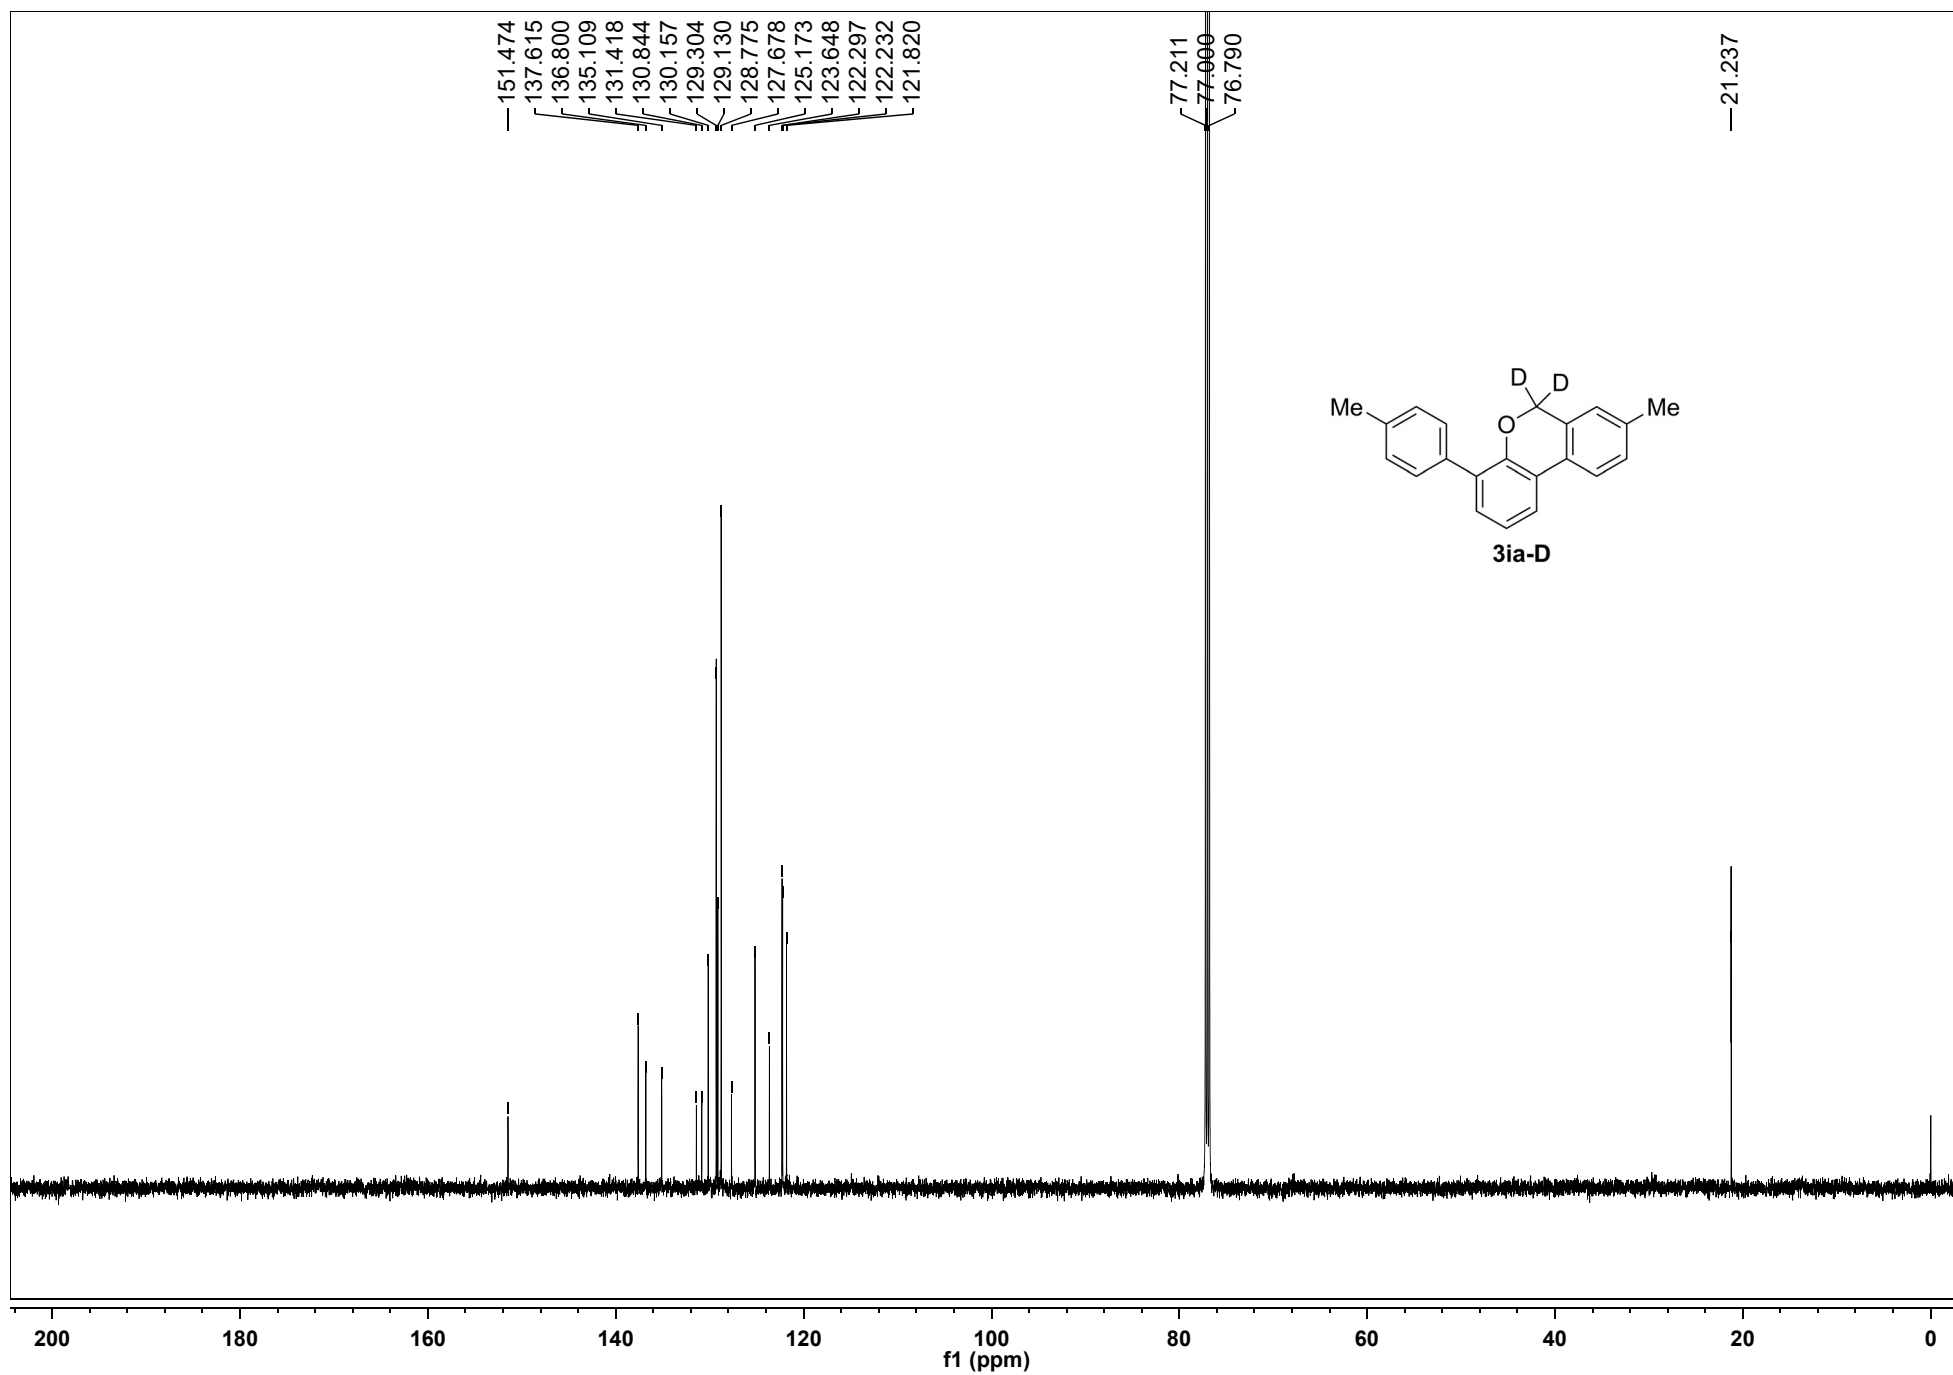

Figure S21. <sup>1</sup>H NMR spectrum (600 MHz, CDCl<sub>3</sub>) of 3ja

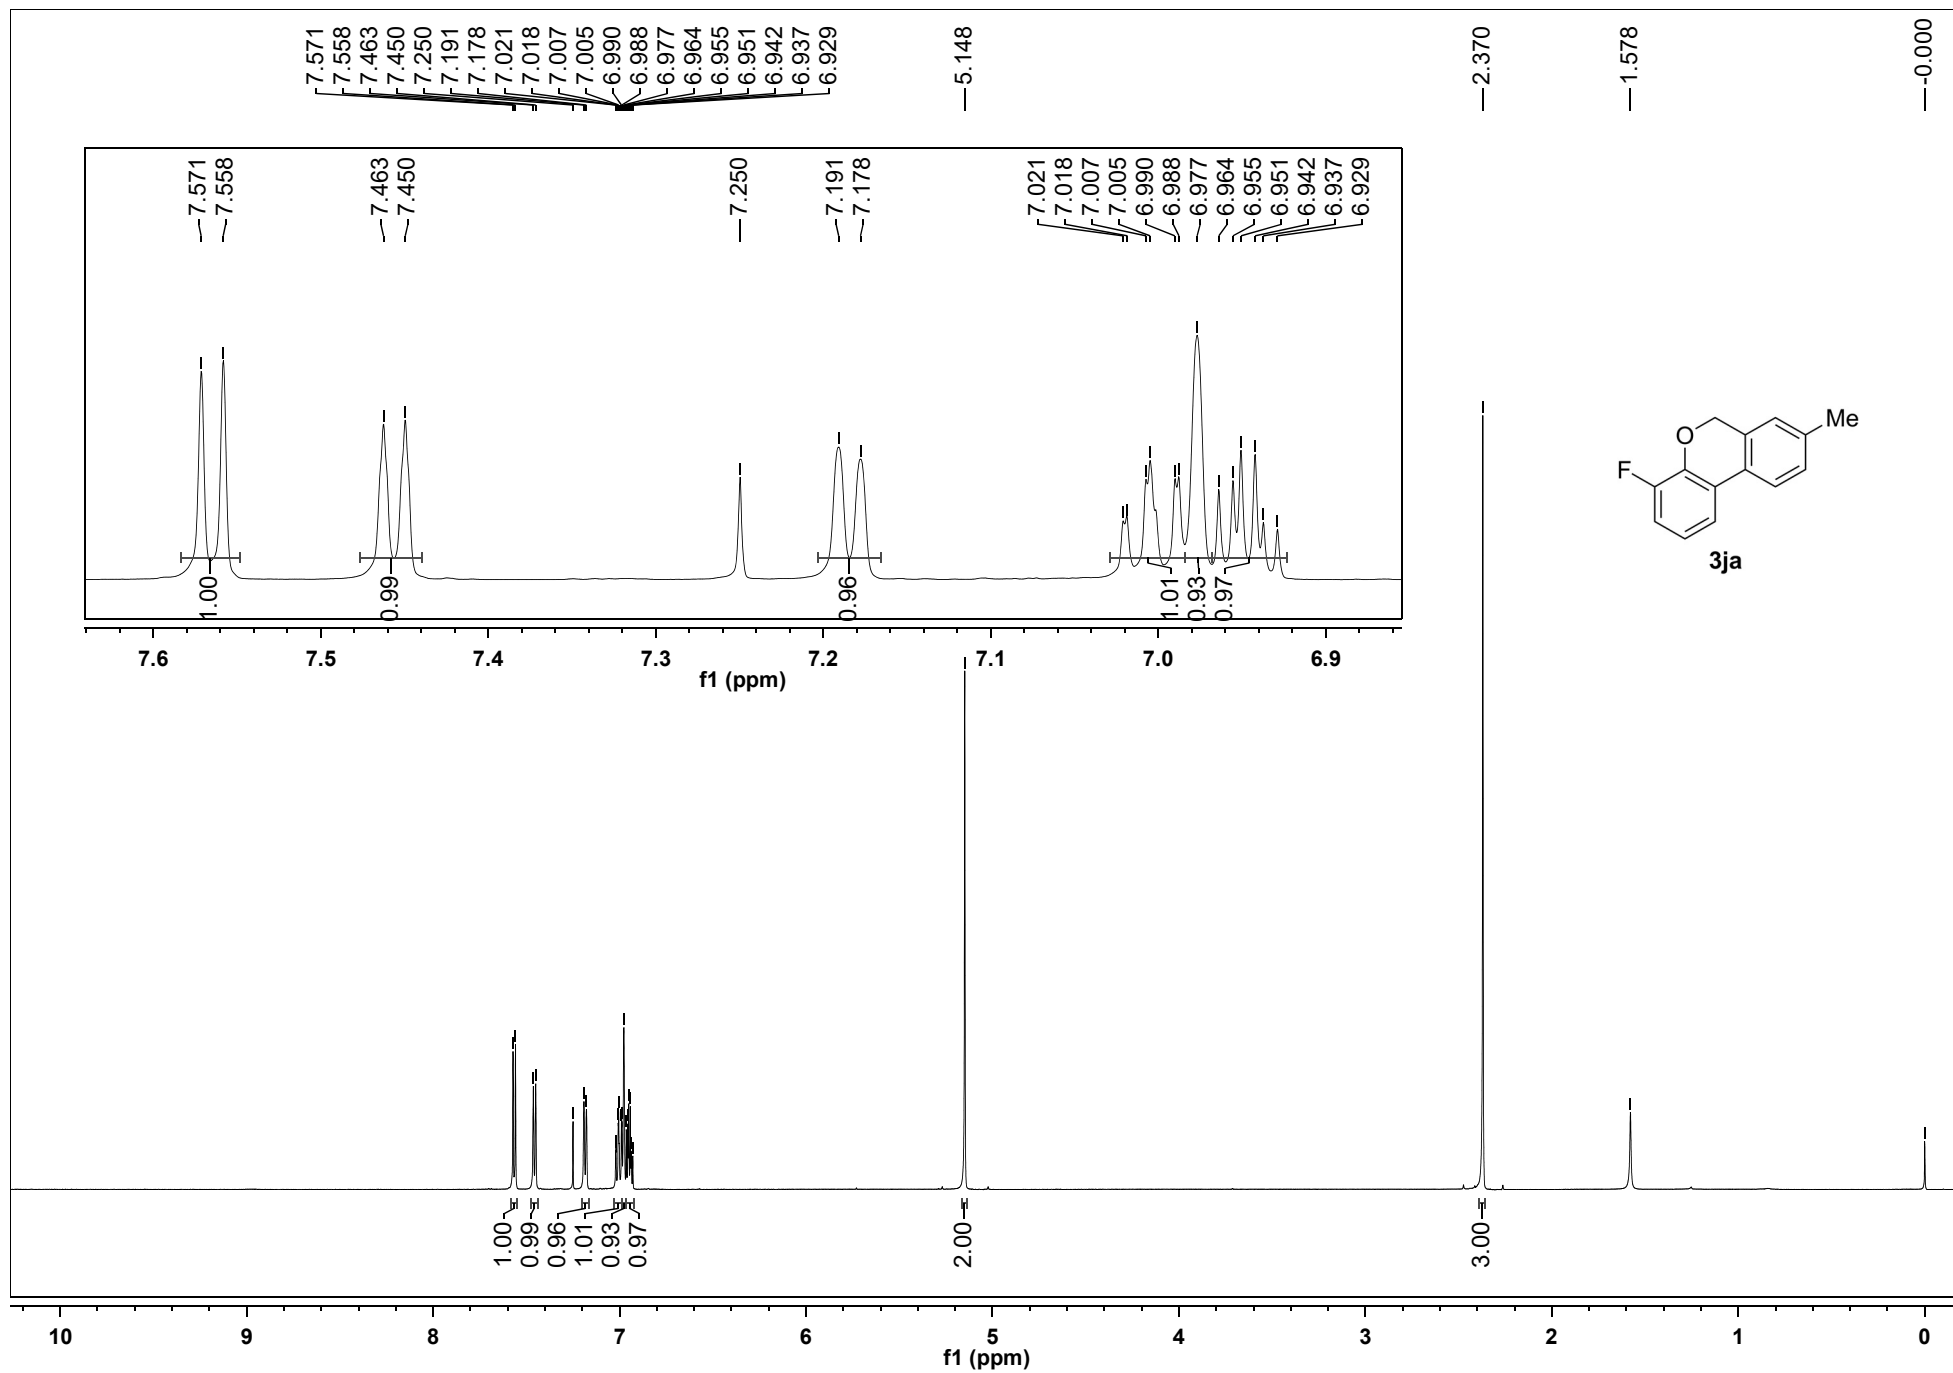

Figure S22.  $^{13}\text{C}\{^1\text{H}\}$  NMR spectrum (150 MHz,  $\text{CDCl}_3$ ) of 3ja

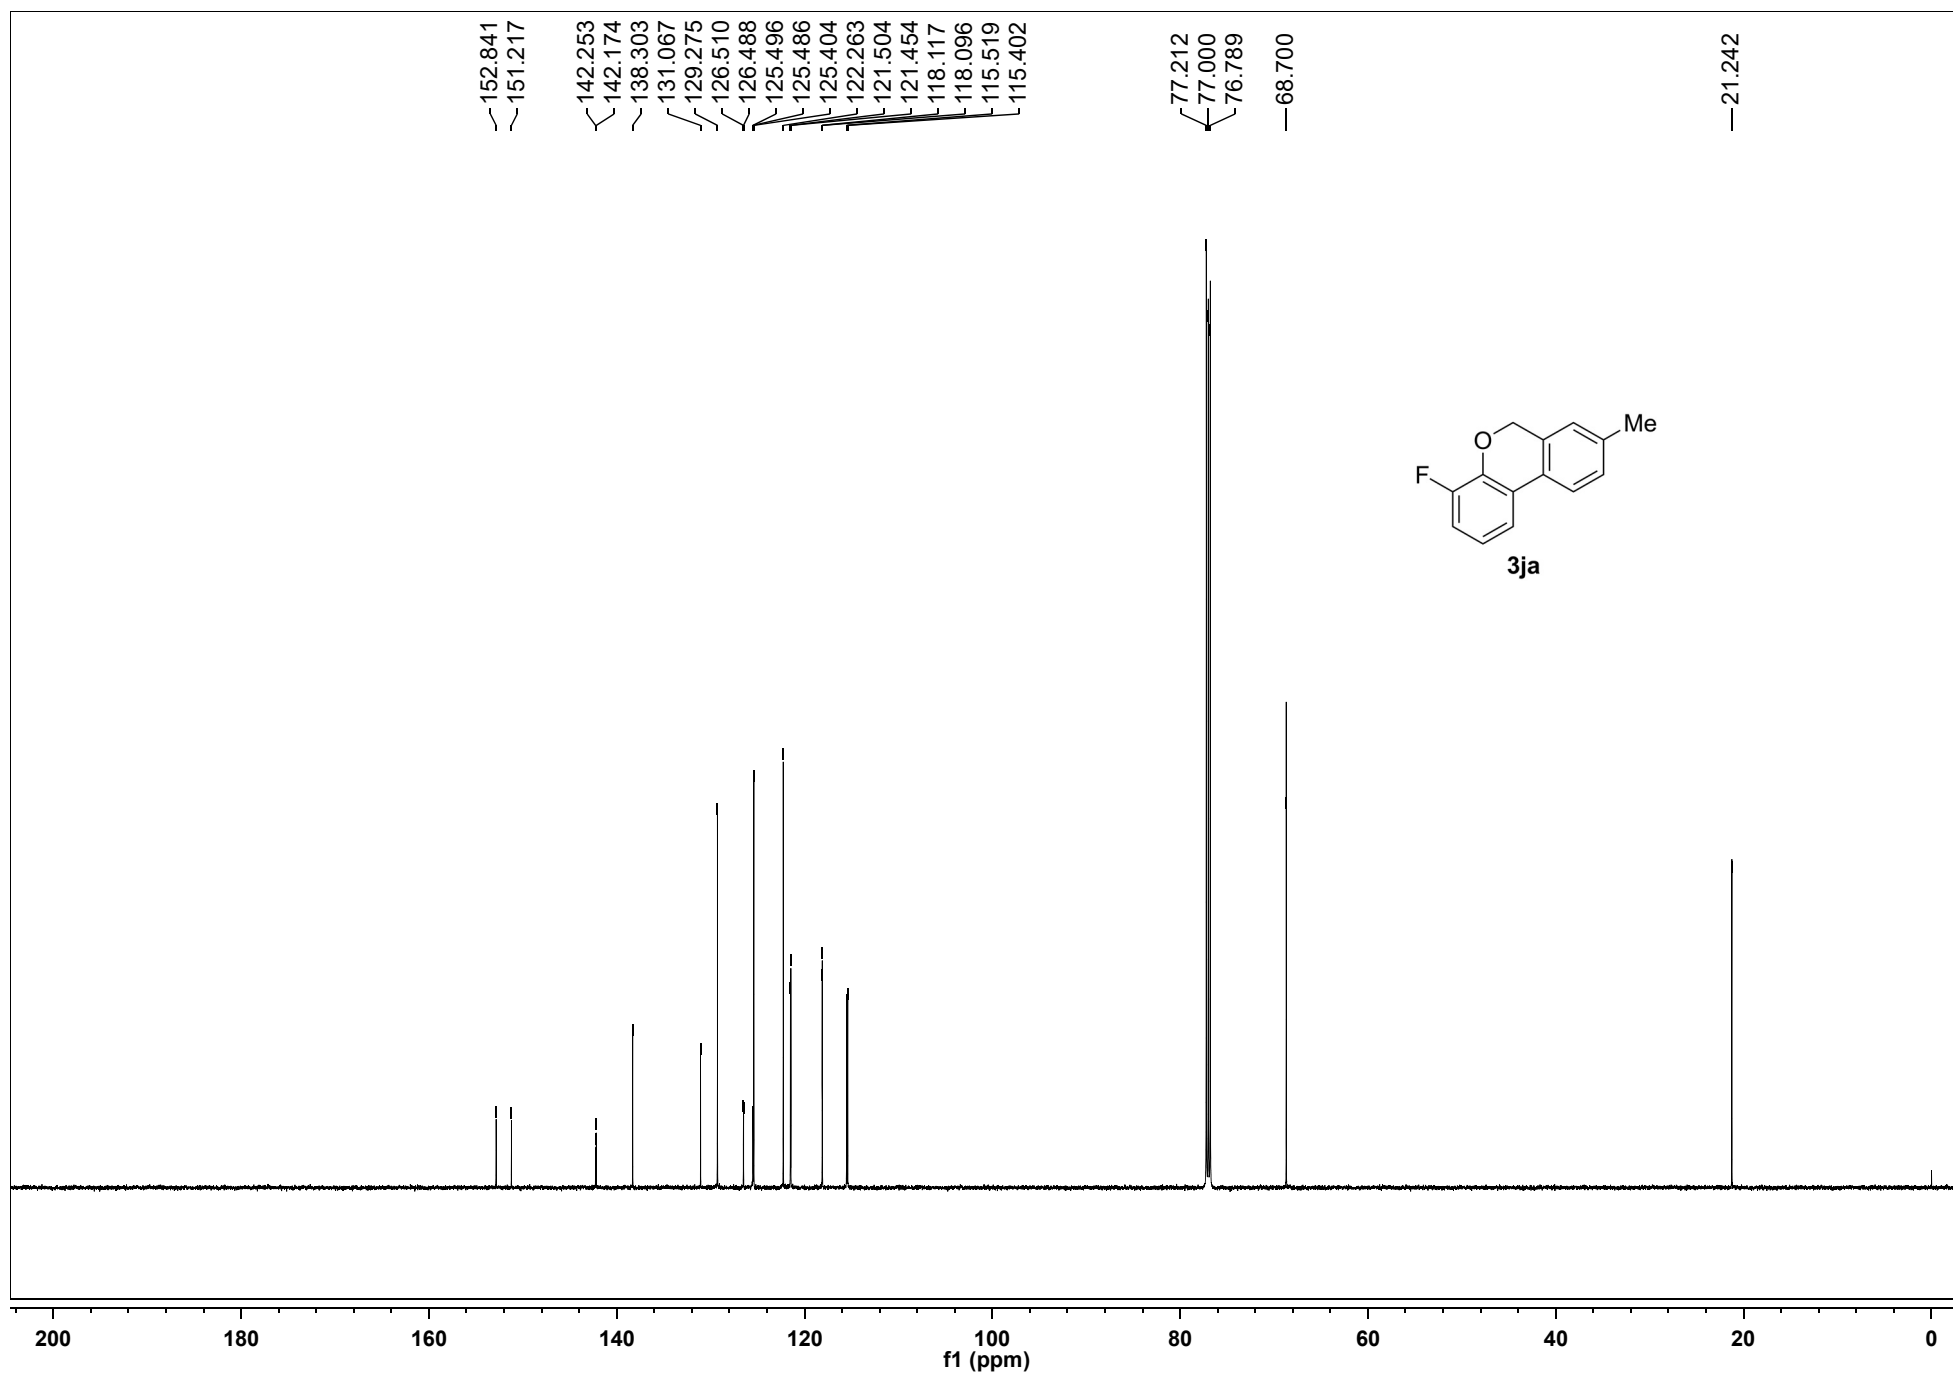

Figure S23. <sup>1</sup>H NMR spectrum (600 MHz, CDCl<sub>3</sub>) of 3ka

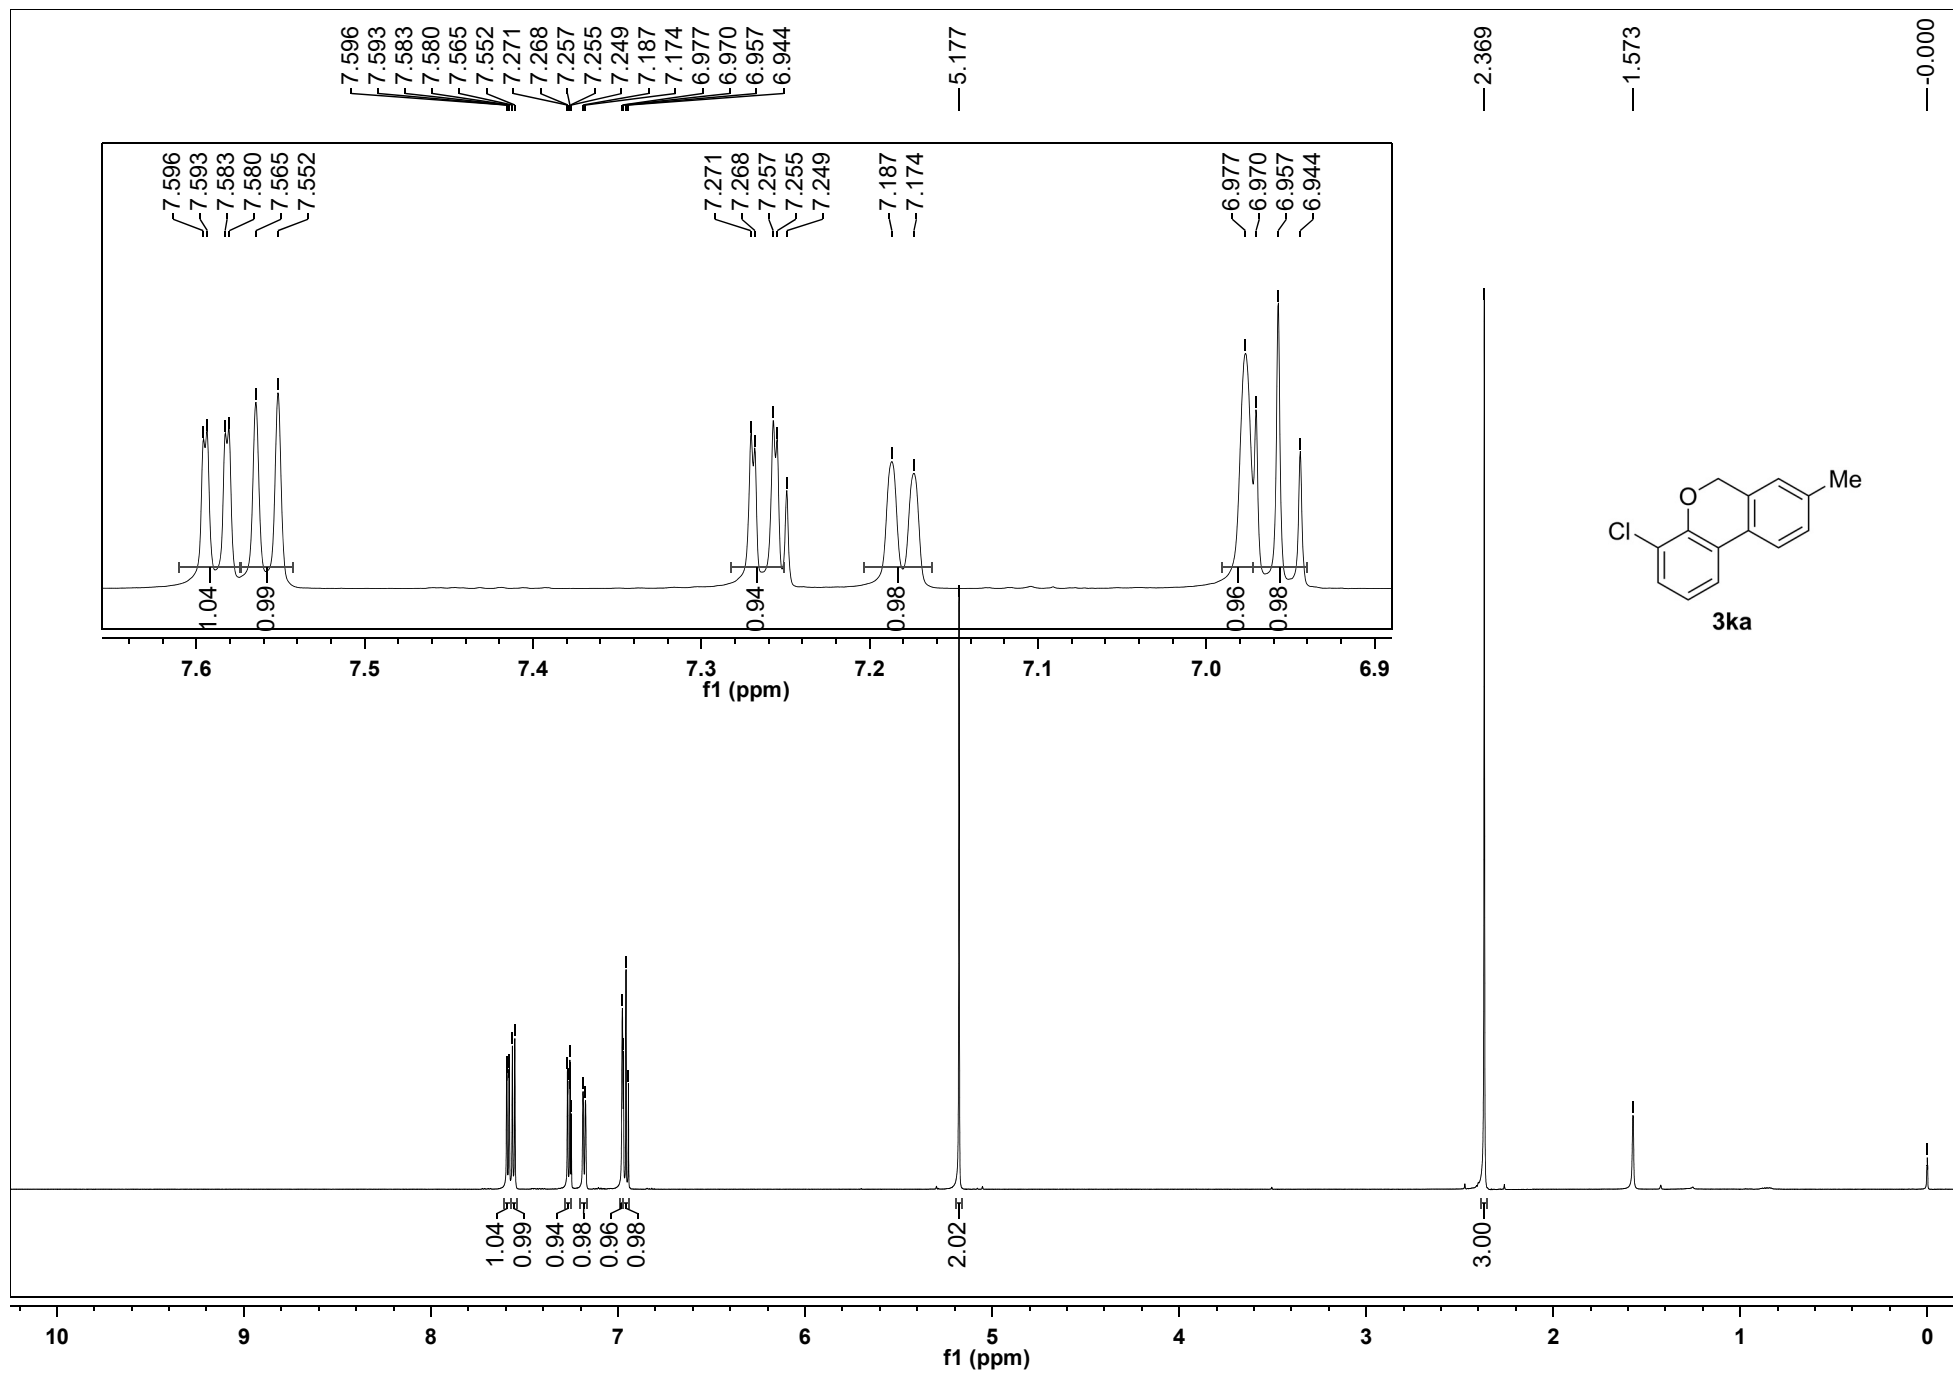

Figure S24.  $^{13}\text{C}\{^1\text{H}\}$  NMR spectrum (150 MHz,  $\text{CDCl}_3$ ) of 3ka

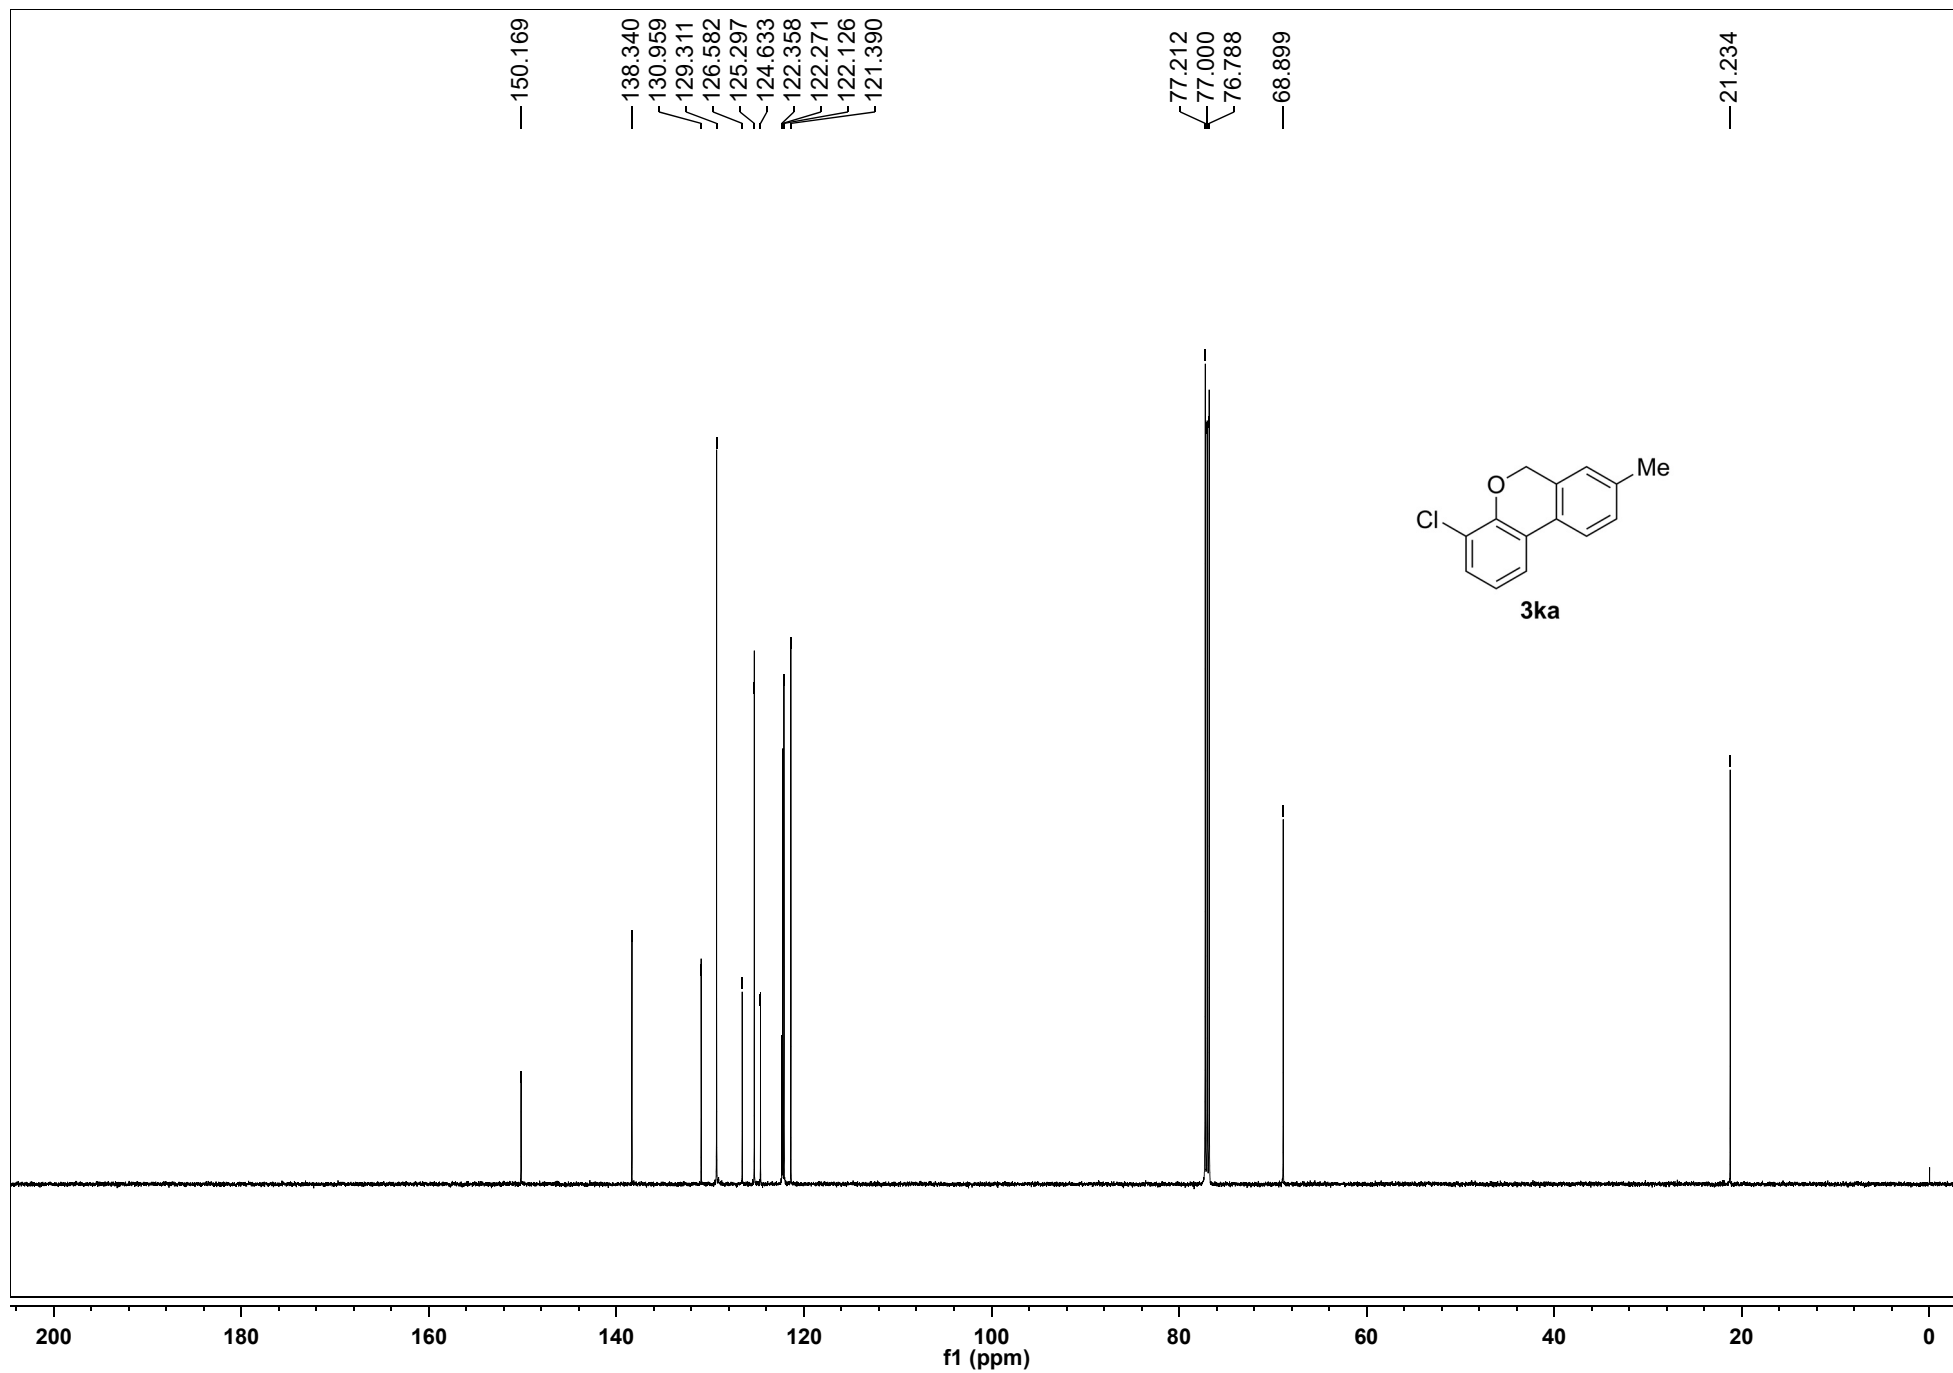



Figure S25. <sup>1</sup>H NMR spectrum (600 MHz, CDCl<sub>3</sub>) of 3la

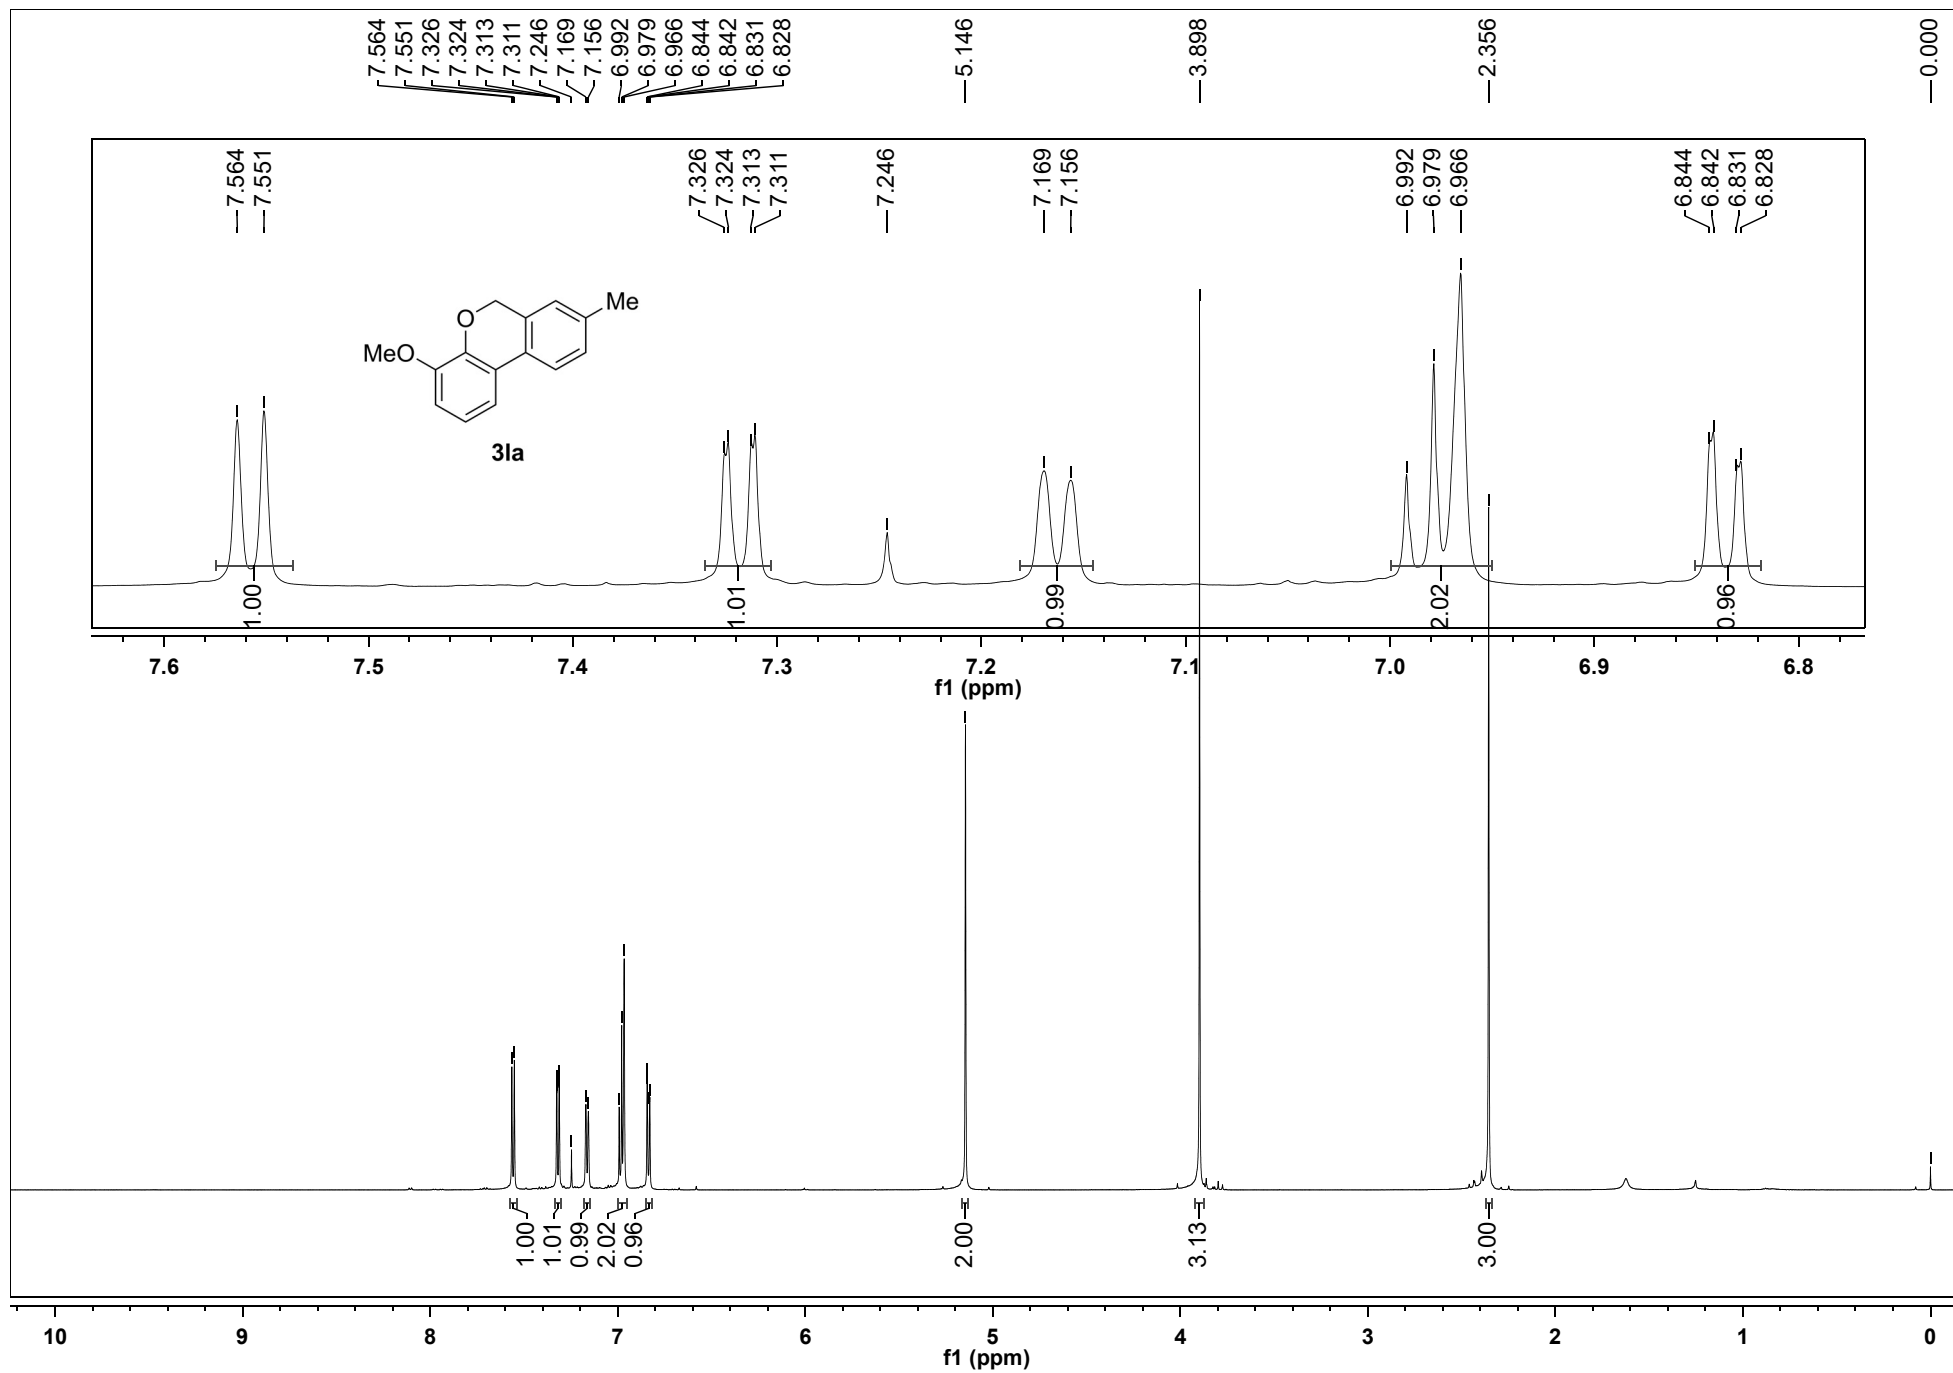

Figure S26.  $^{13}\text{C}\{^1\text{H}\}$  NMR spectrum (150 MHz,  $\text{CDCl}_3$ ) of 3la

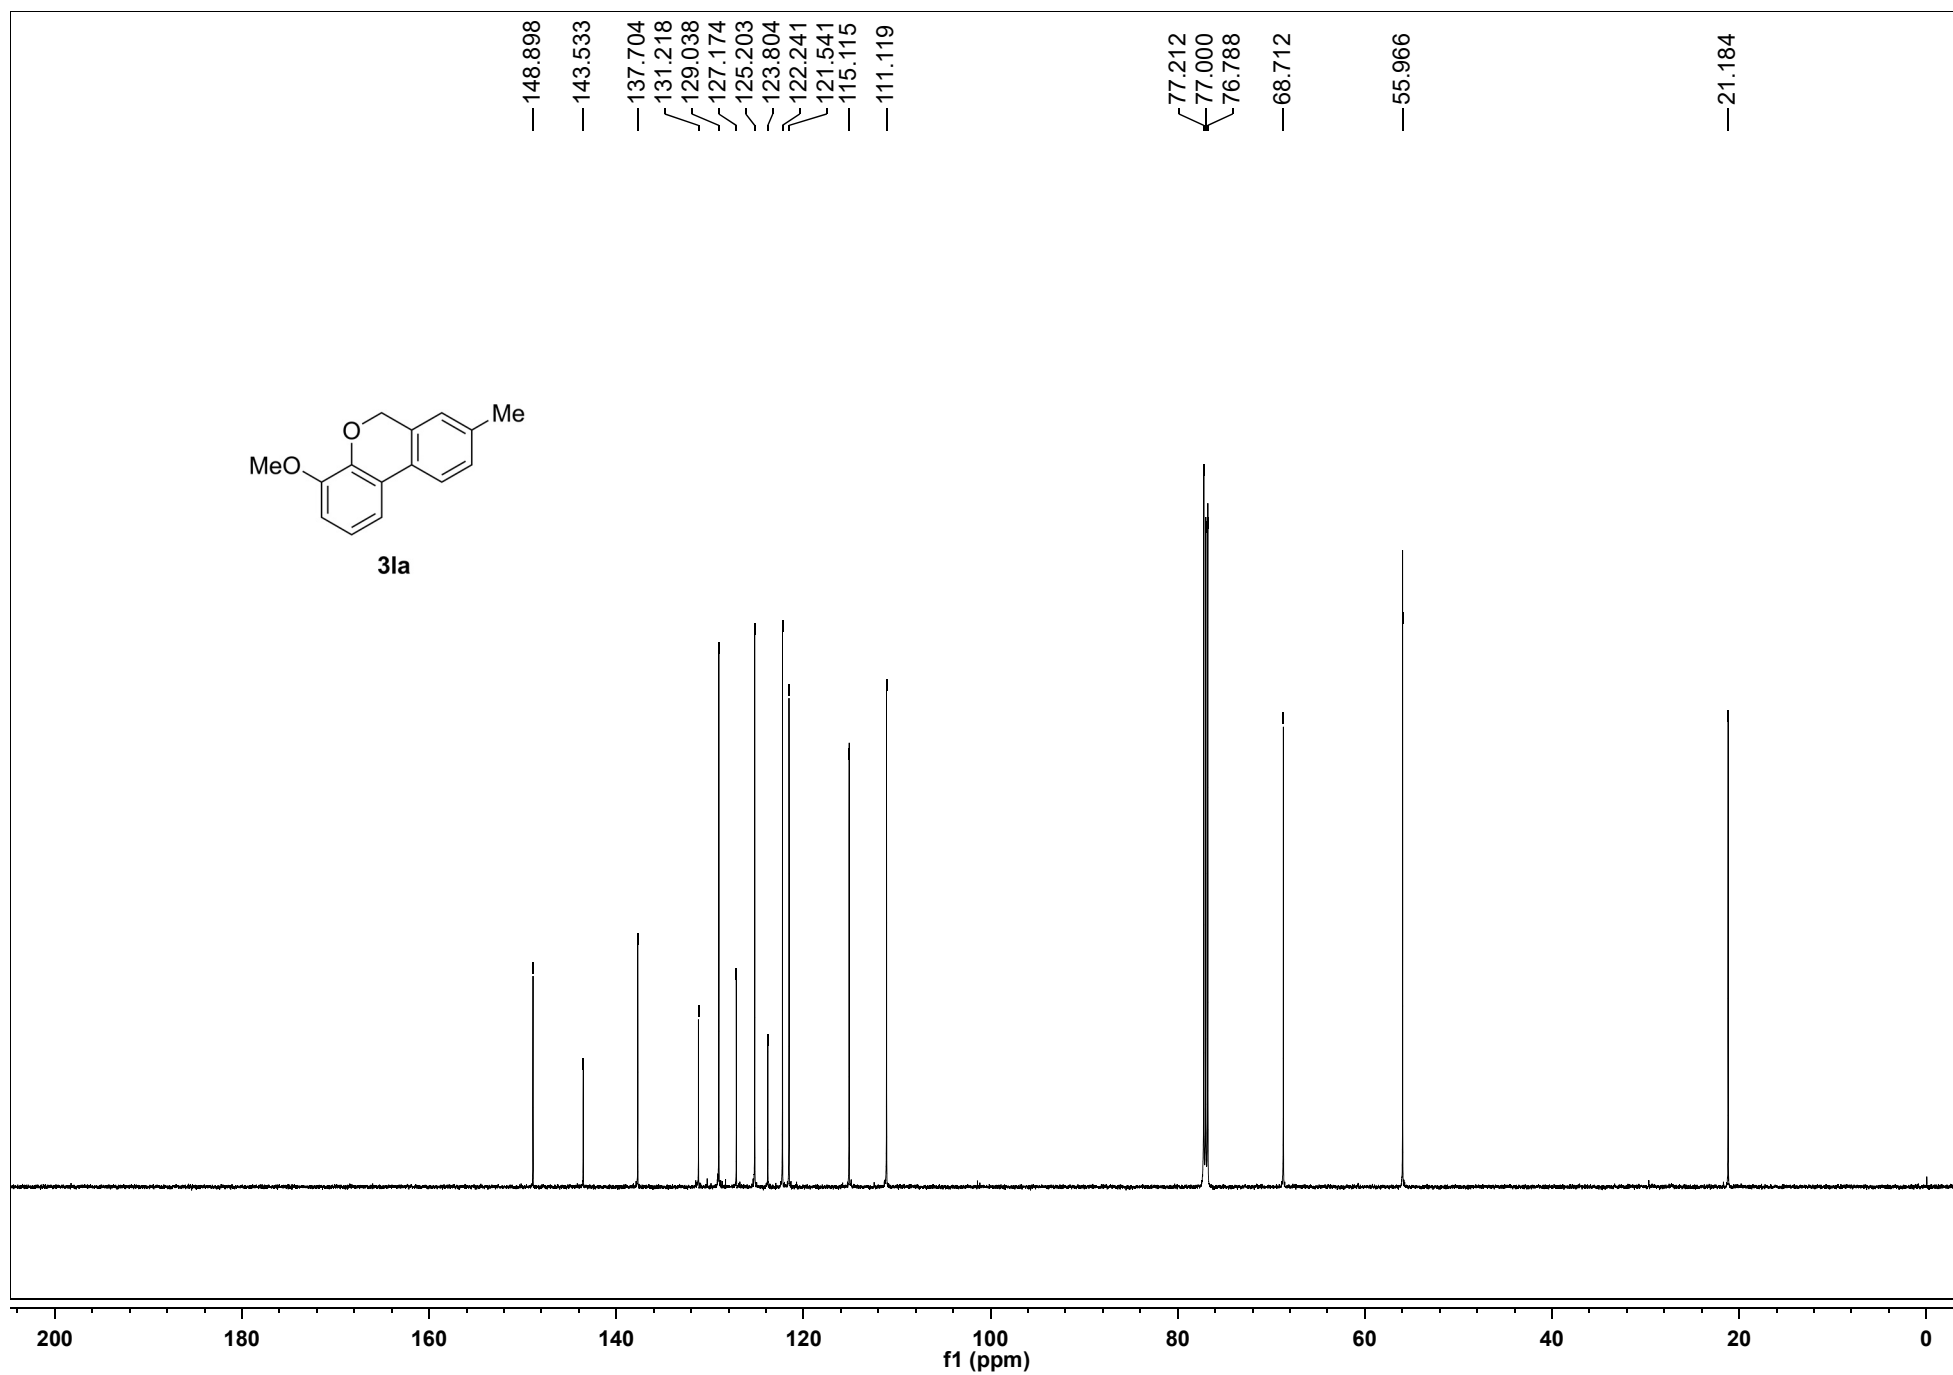

Figure S27. <sup>1</sup>H NMR spectrum (600 MHz, CDCl<sub>3</sub>) of 3ma

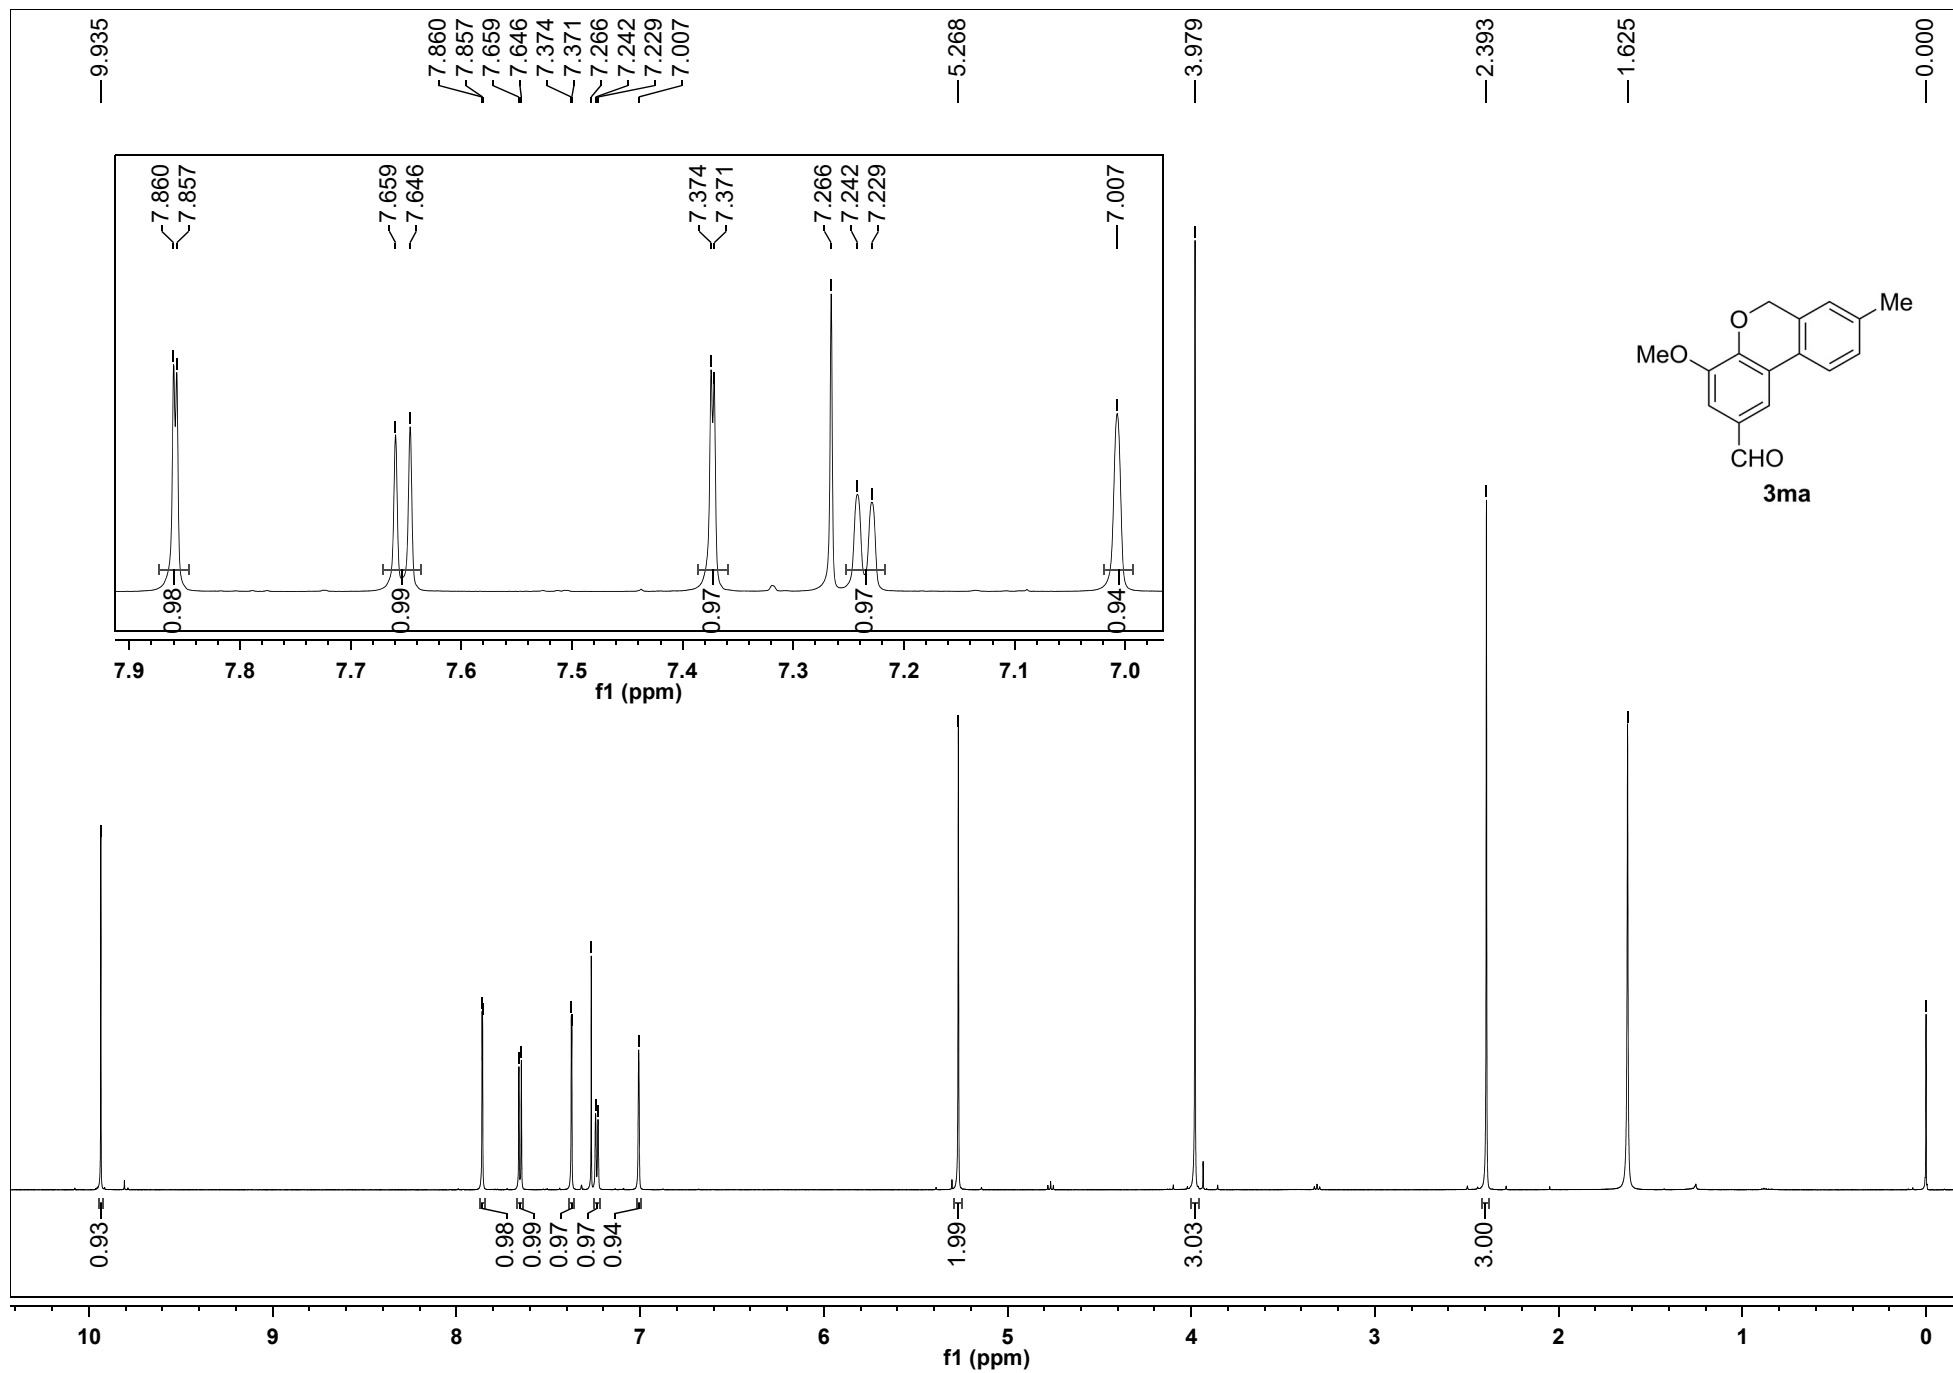

Figure S28.  $^{13}\text{C}\{^1\text{H}\}$  NMR spectrum (150 MHz,  $\text{CDCl}_3$ ) of 3ma

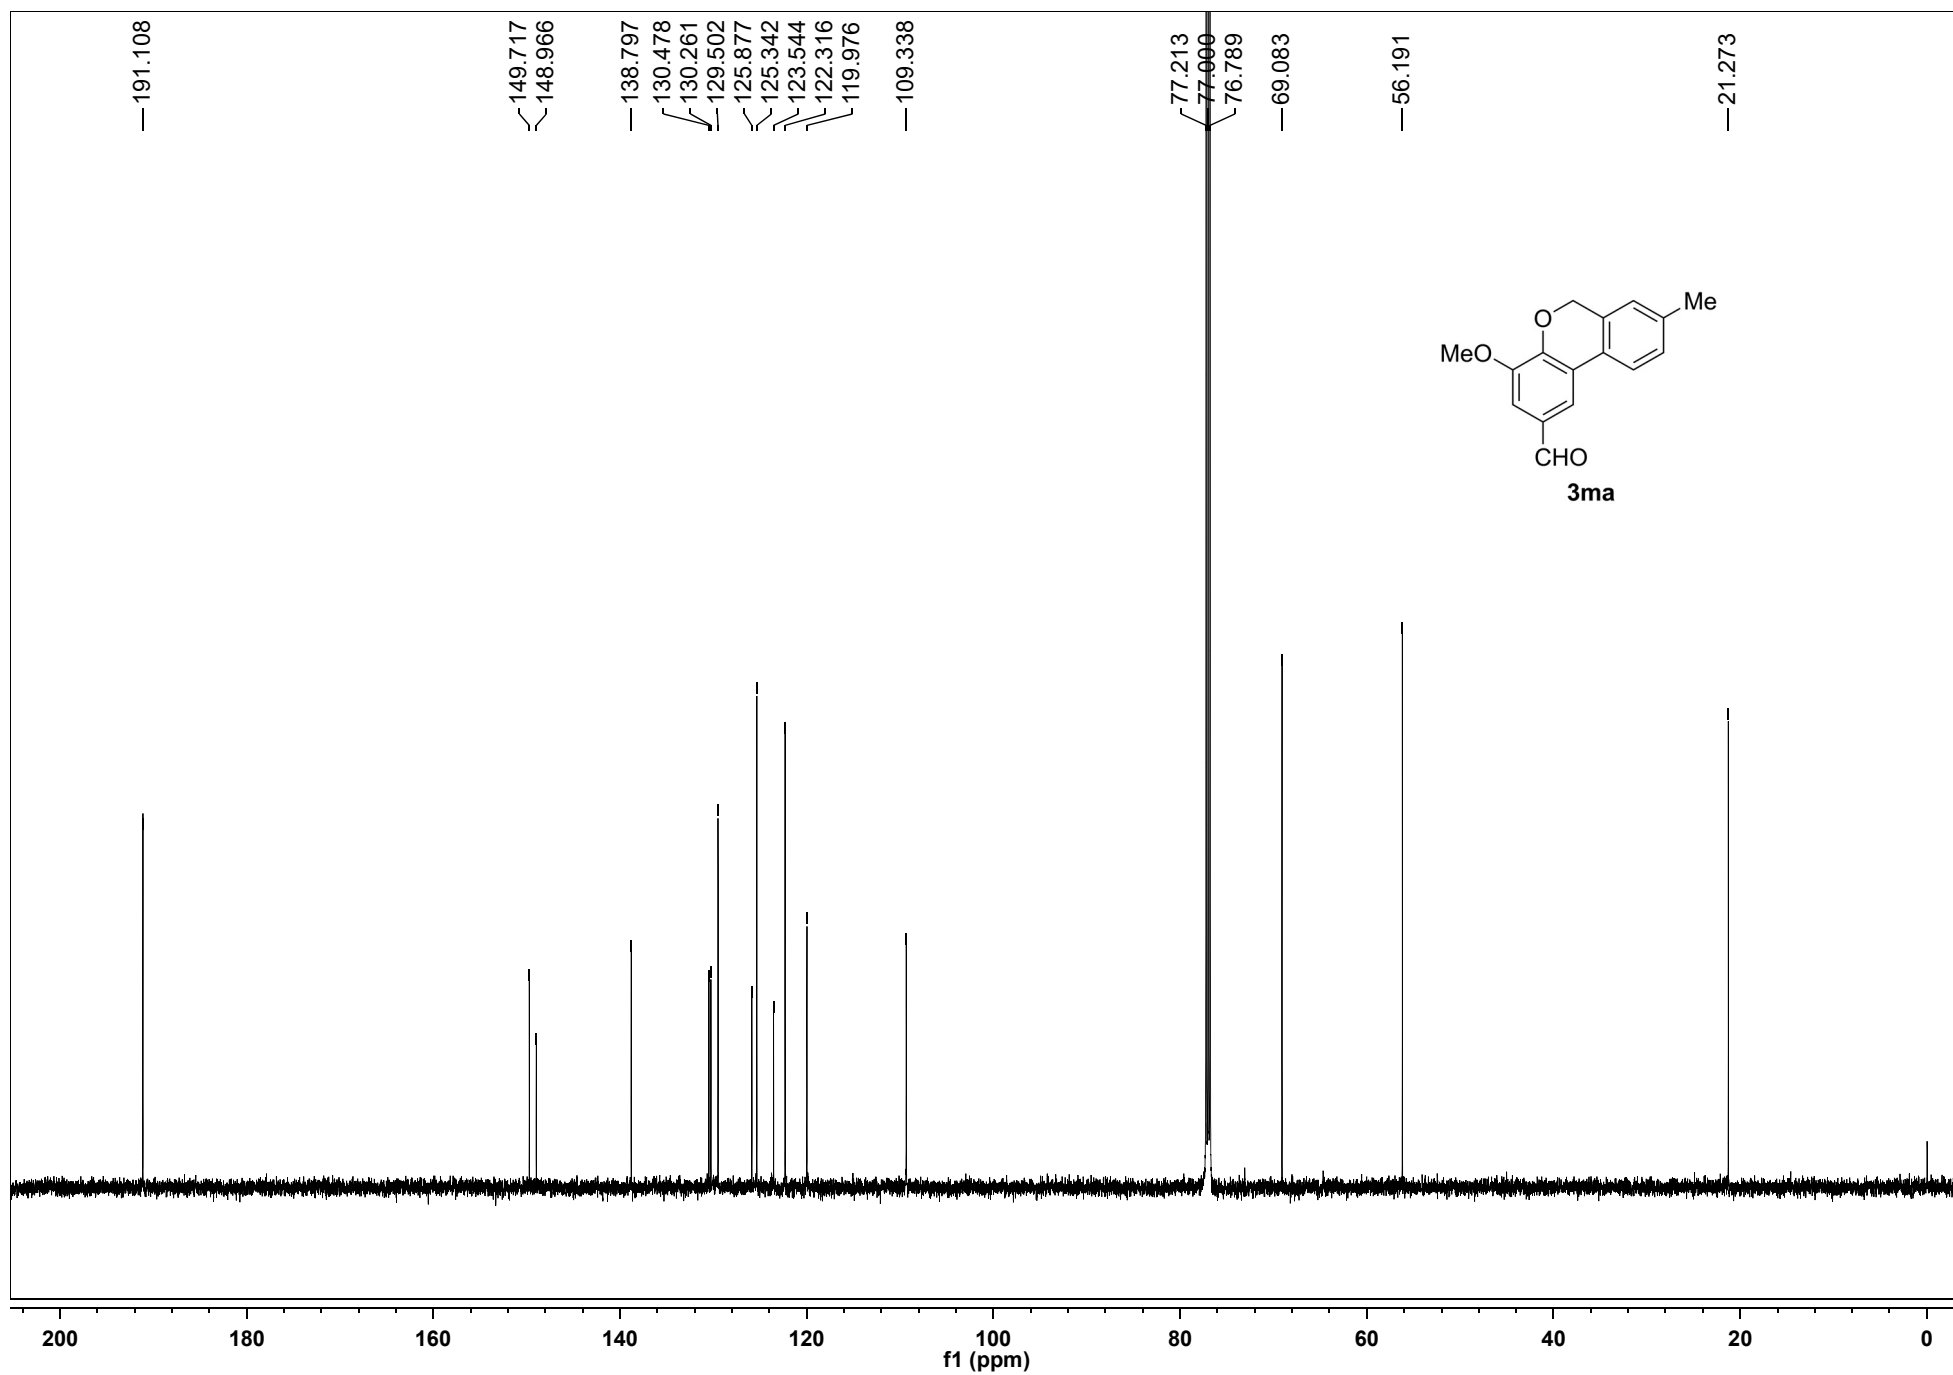

Figure S29. <sup>1</sup>H NMR spectrum (600 MHz, CDCl<sub>3</sub>) of 3ab

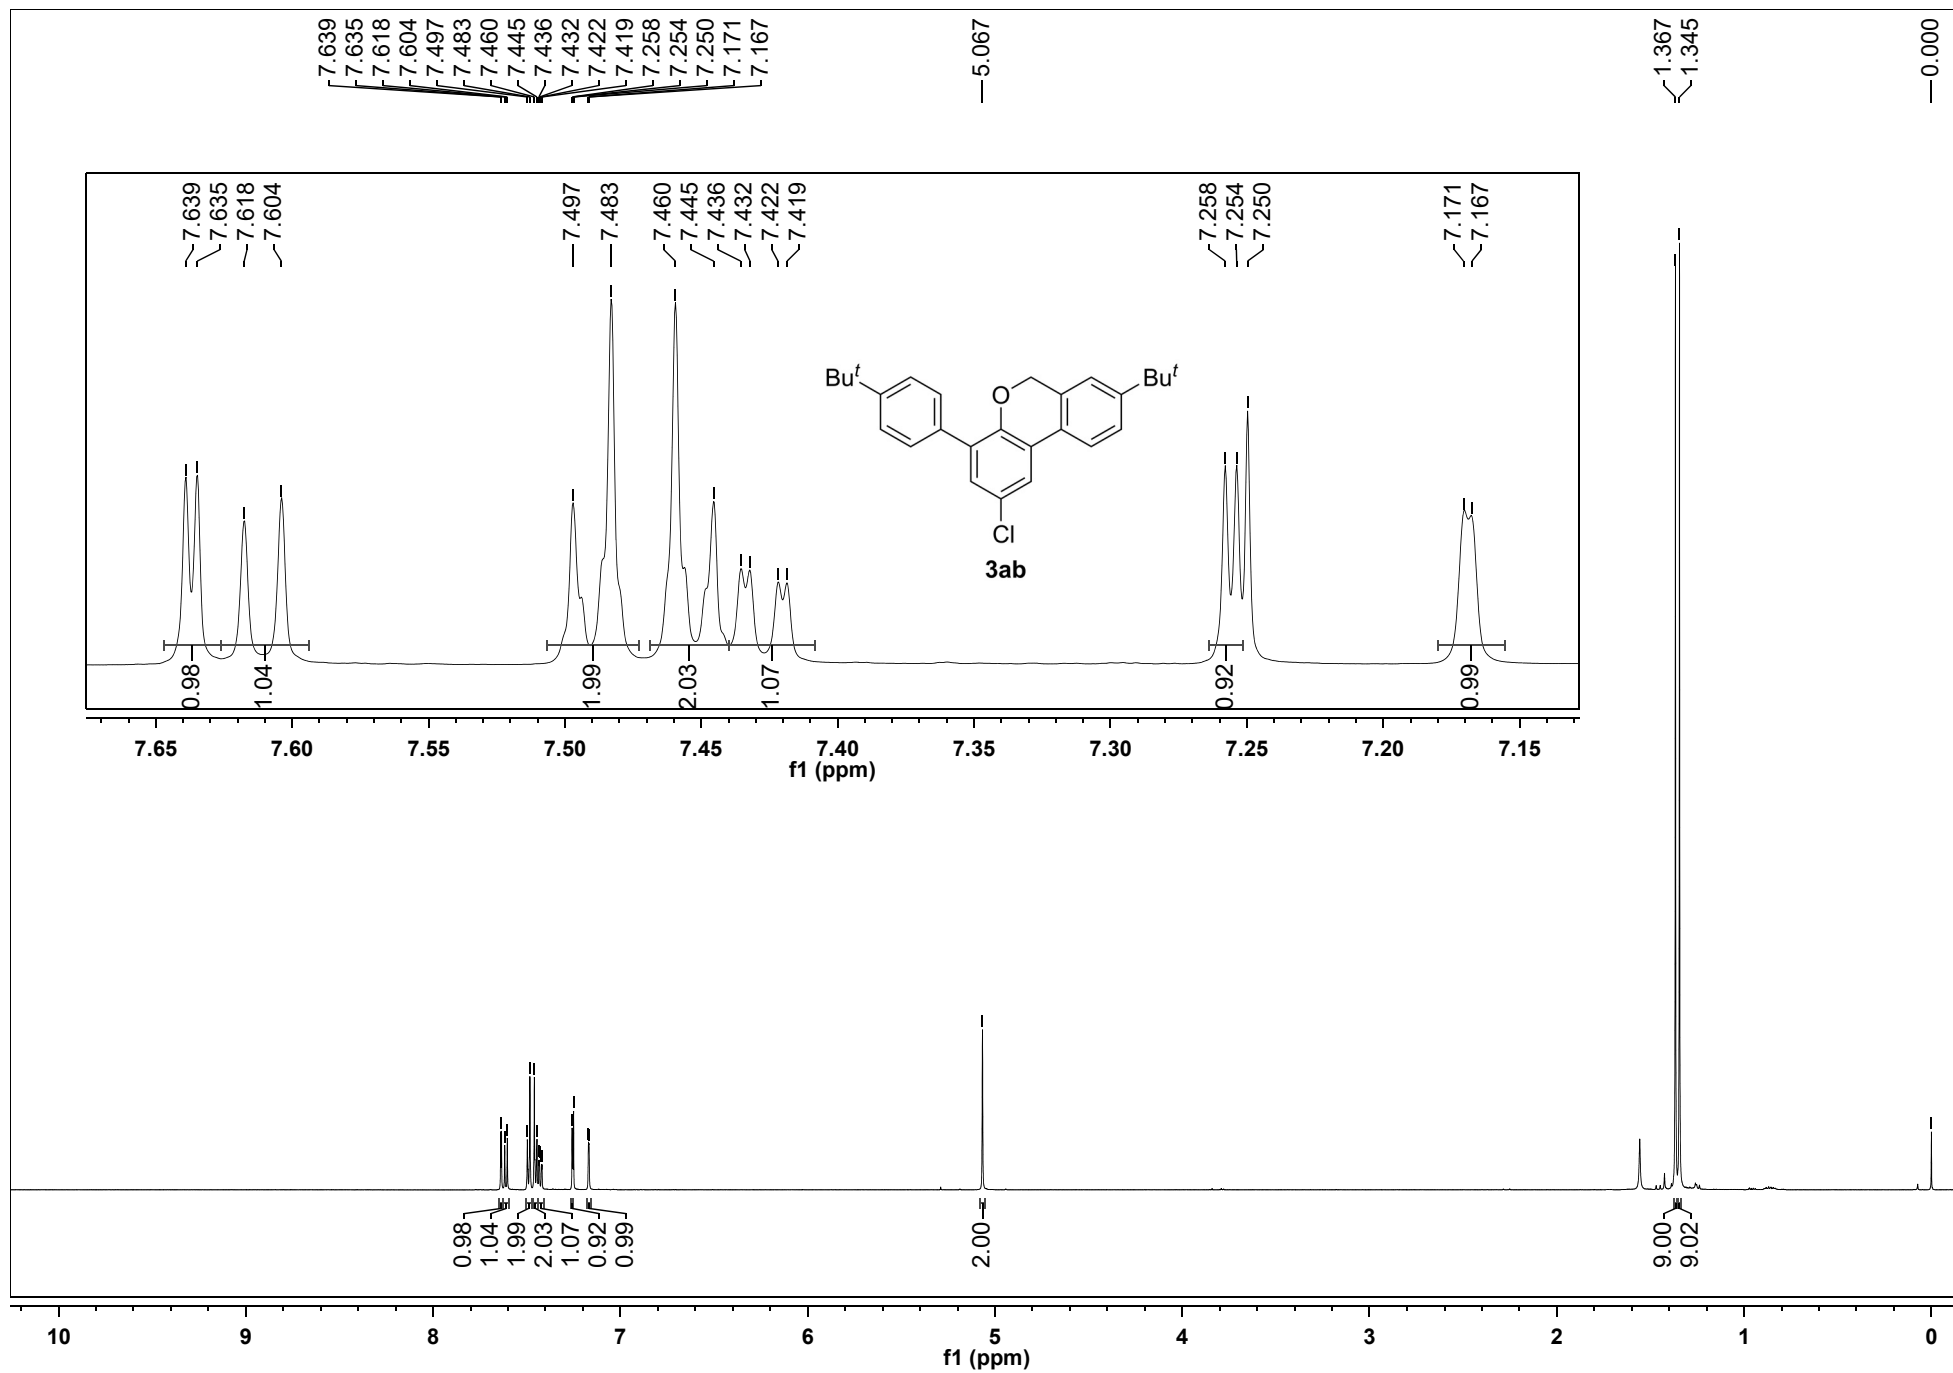

Figure S30.  $^{13}\text{C}\{^1\text{H}\}$  NMR spectrum (150 MHz,  $\text{CDCl}_3$ ) of 3ab

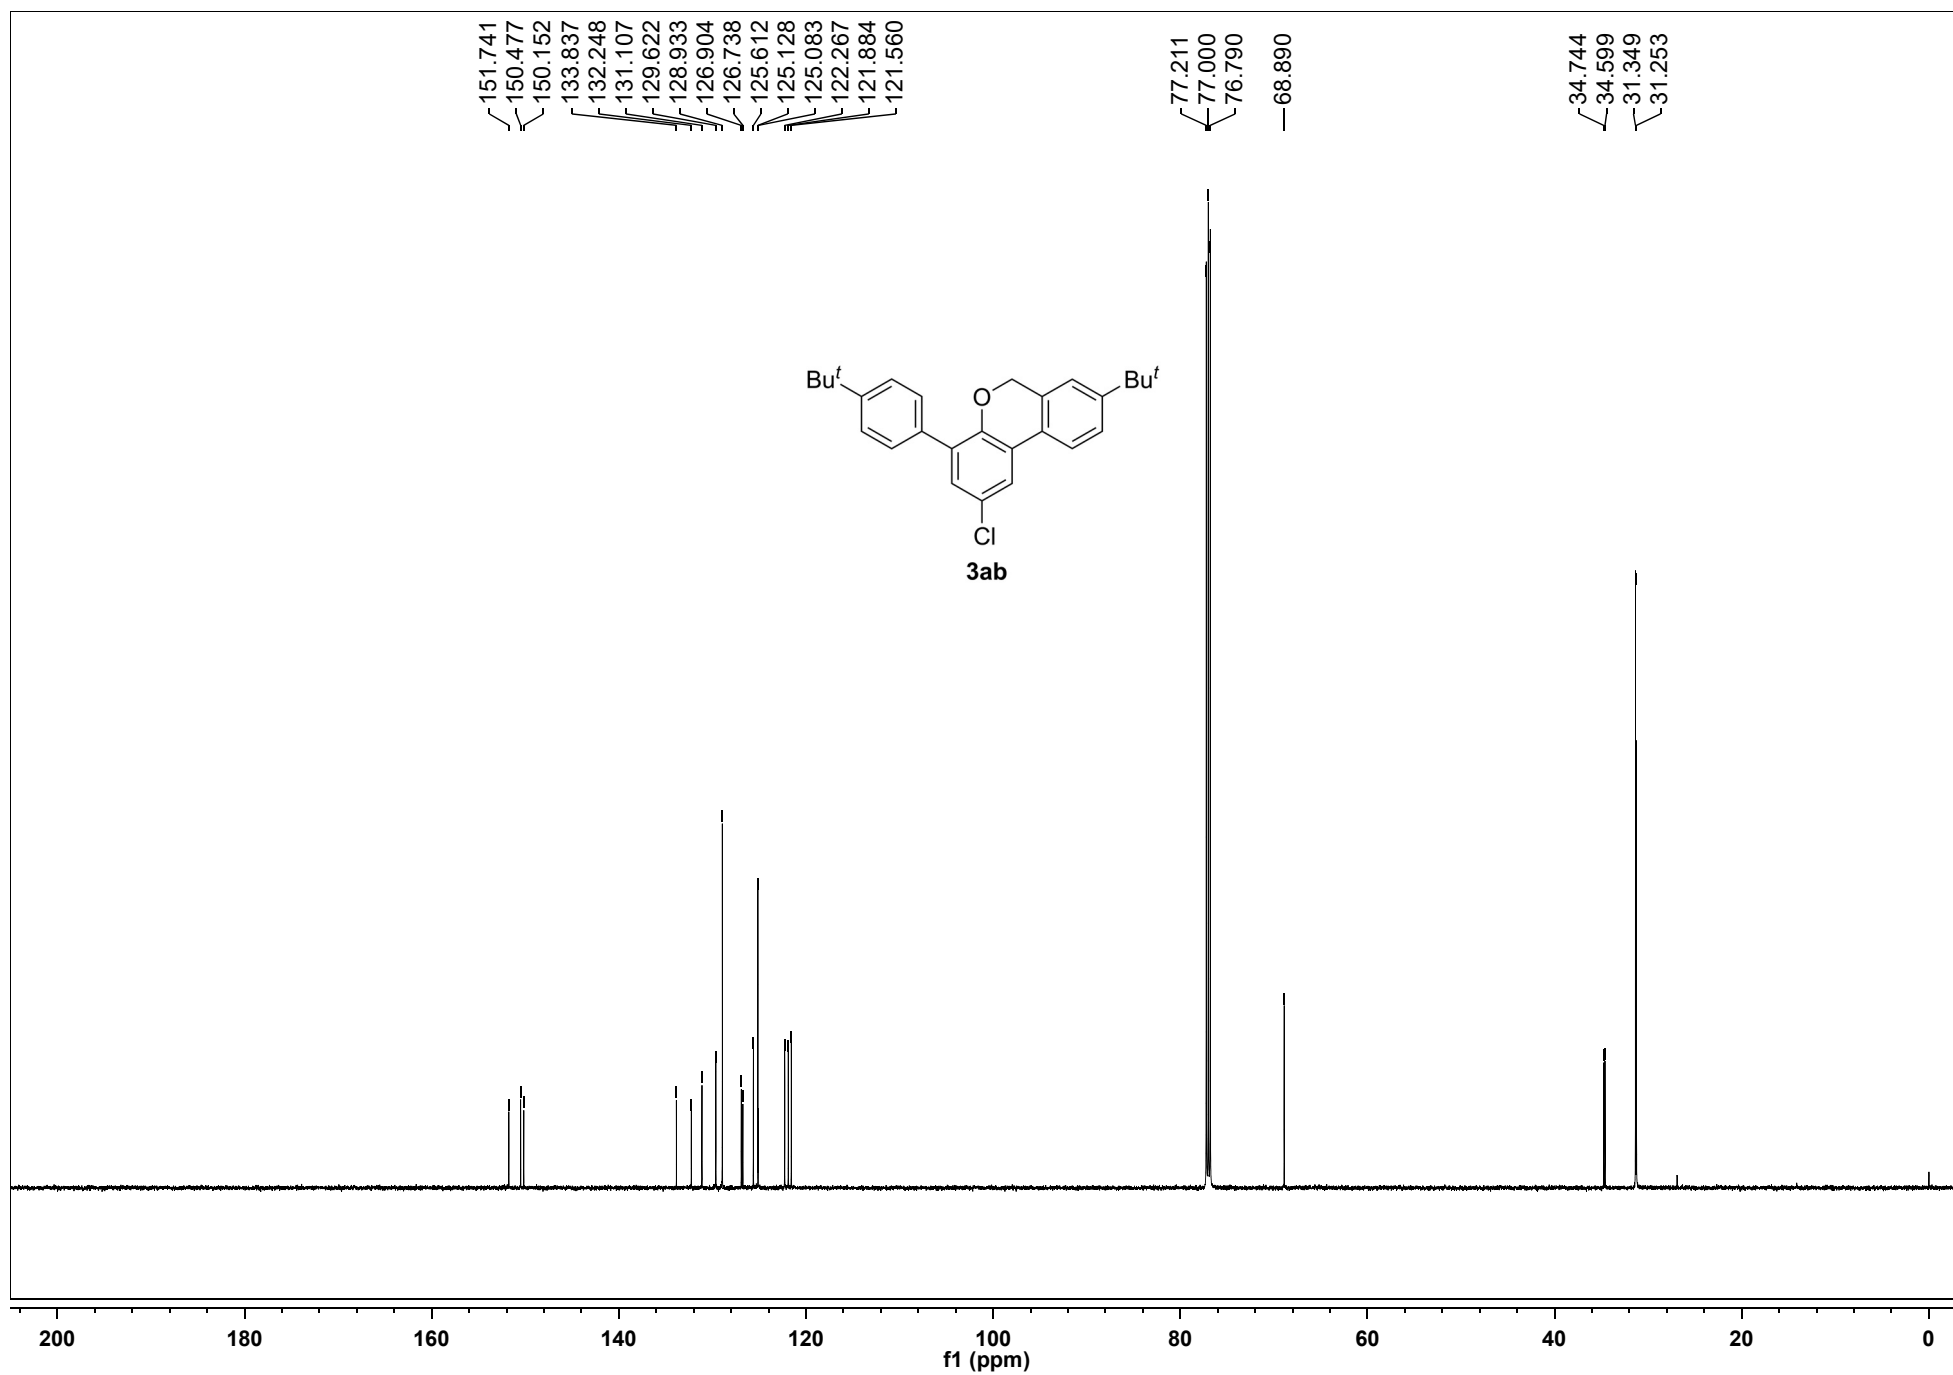

Figure S31. <sup>1</sup>H NMR spectrum (600 MHz, CDCl<sub>3</sub>) of 3ac

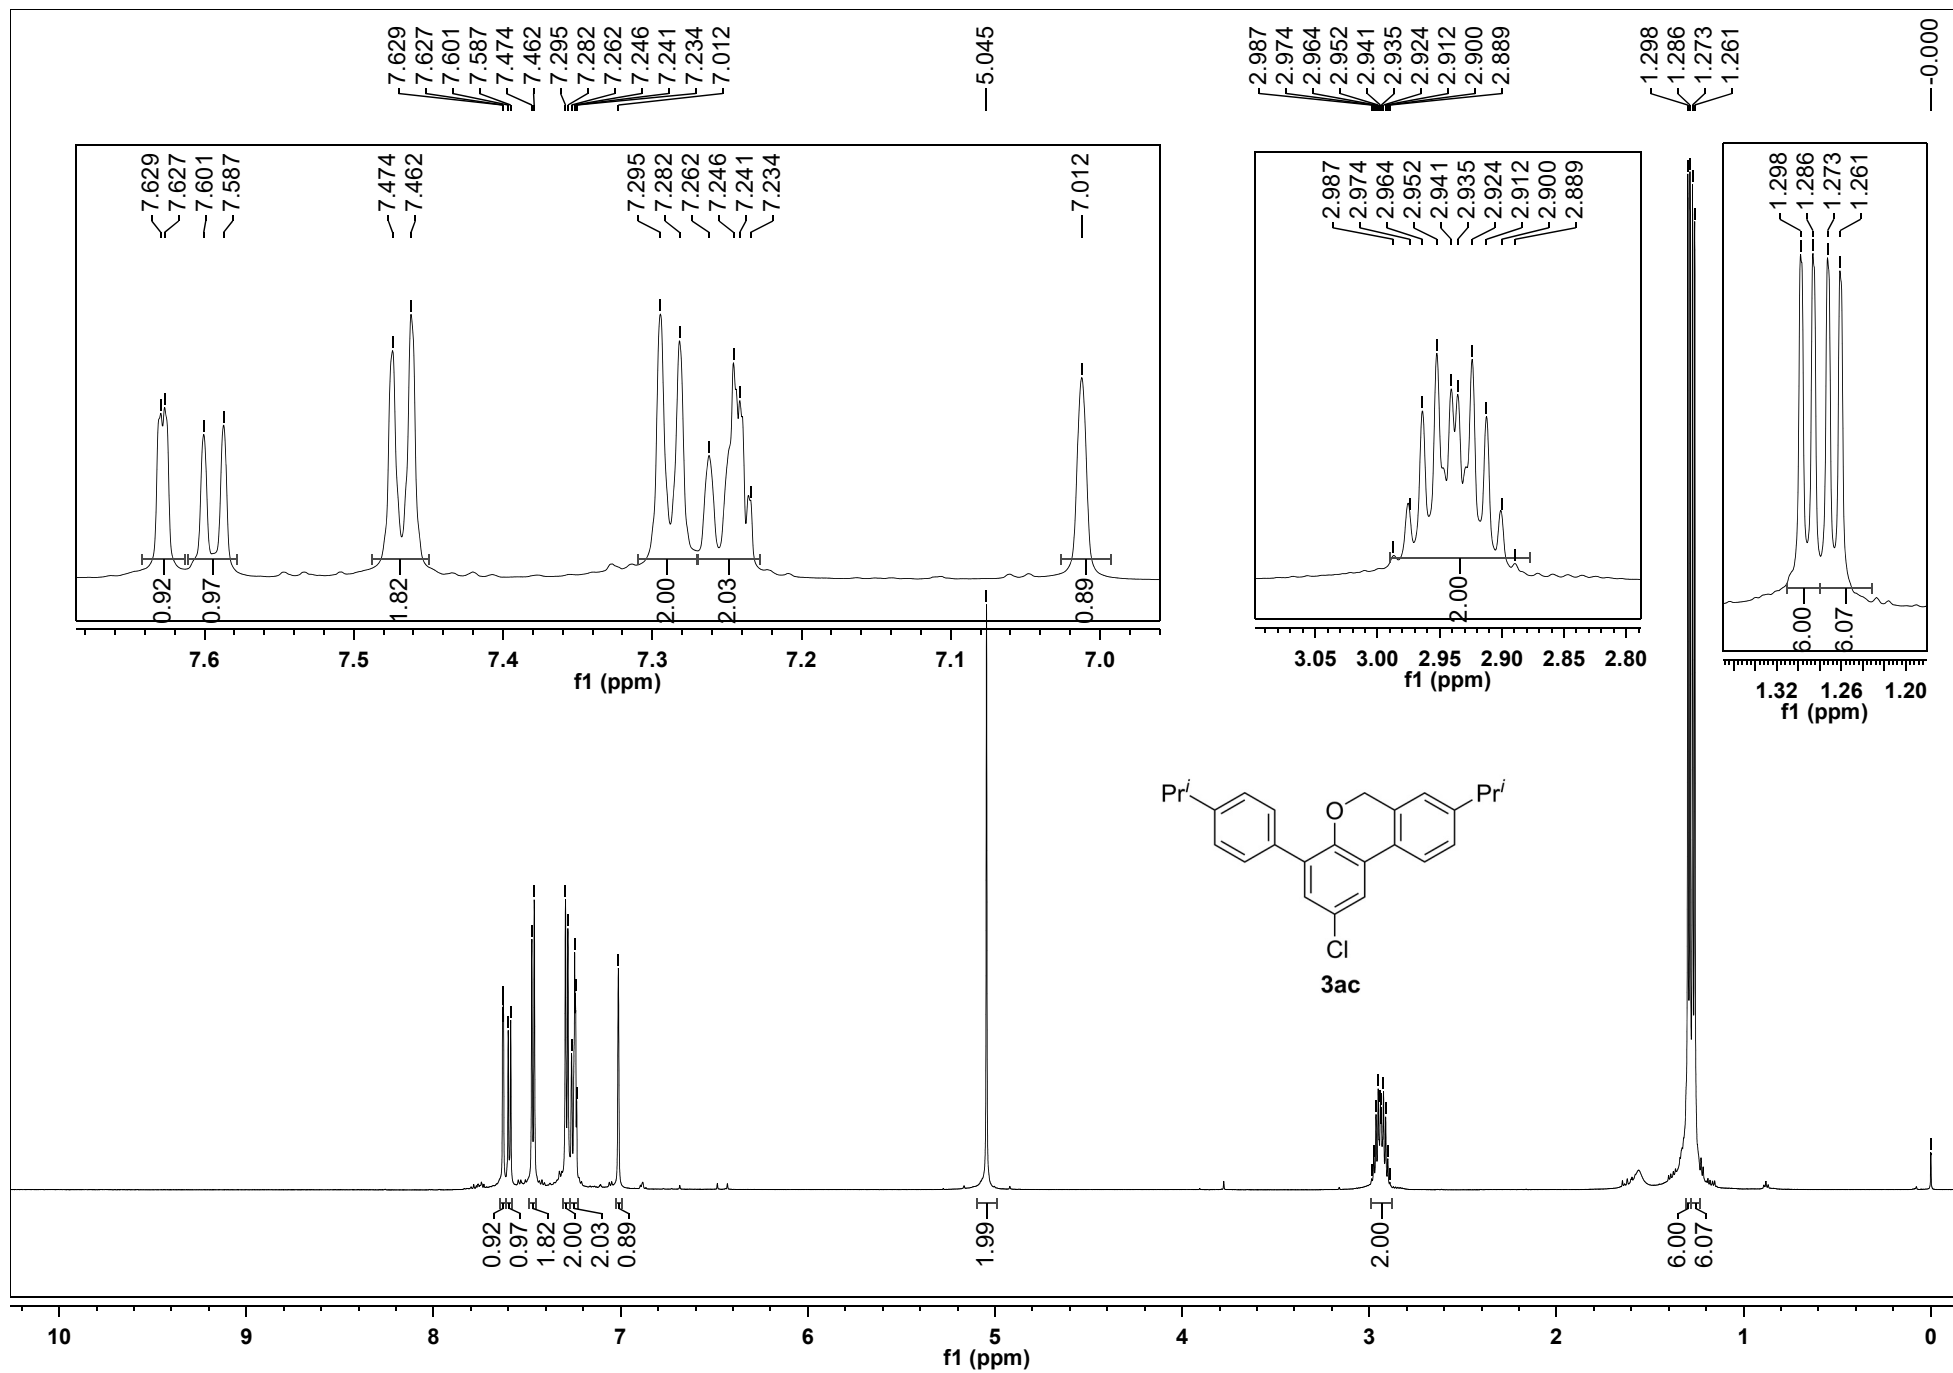

Figure S32.  $^{13}\text{C}\{^1\text{H}\}$  NMR spectrum (150 MHz,  $\text{CDCl}_3$ ) of **3ac**

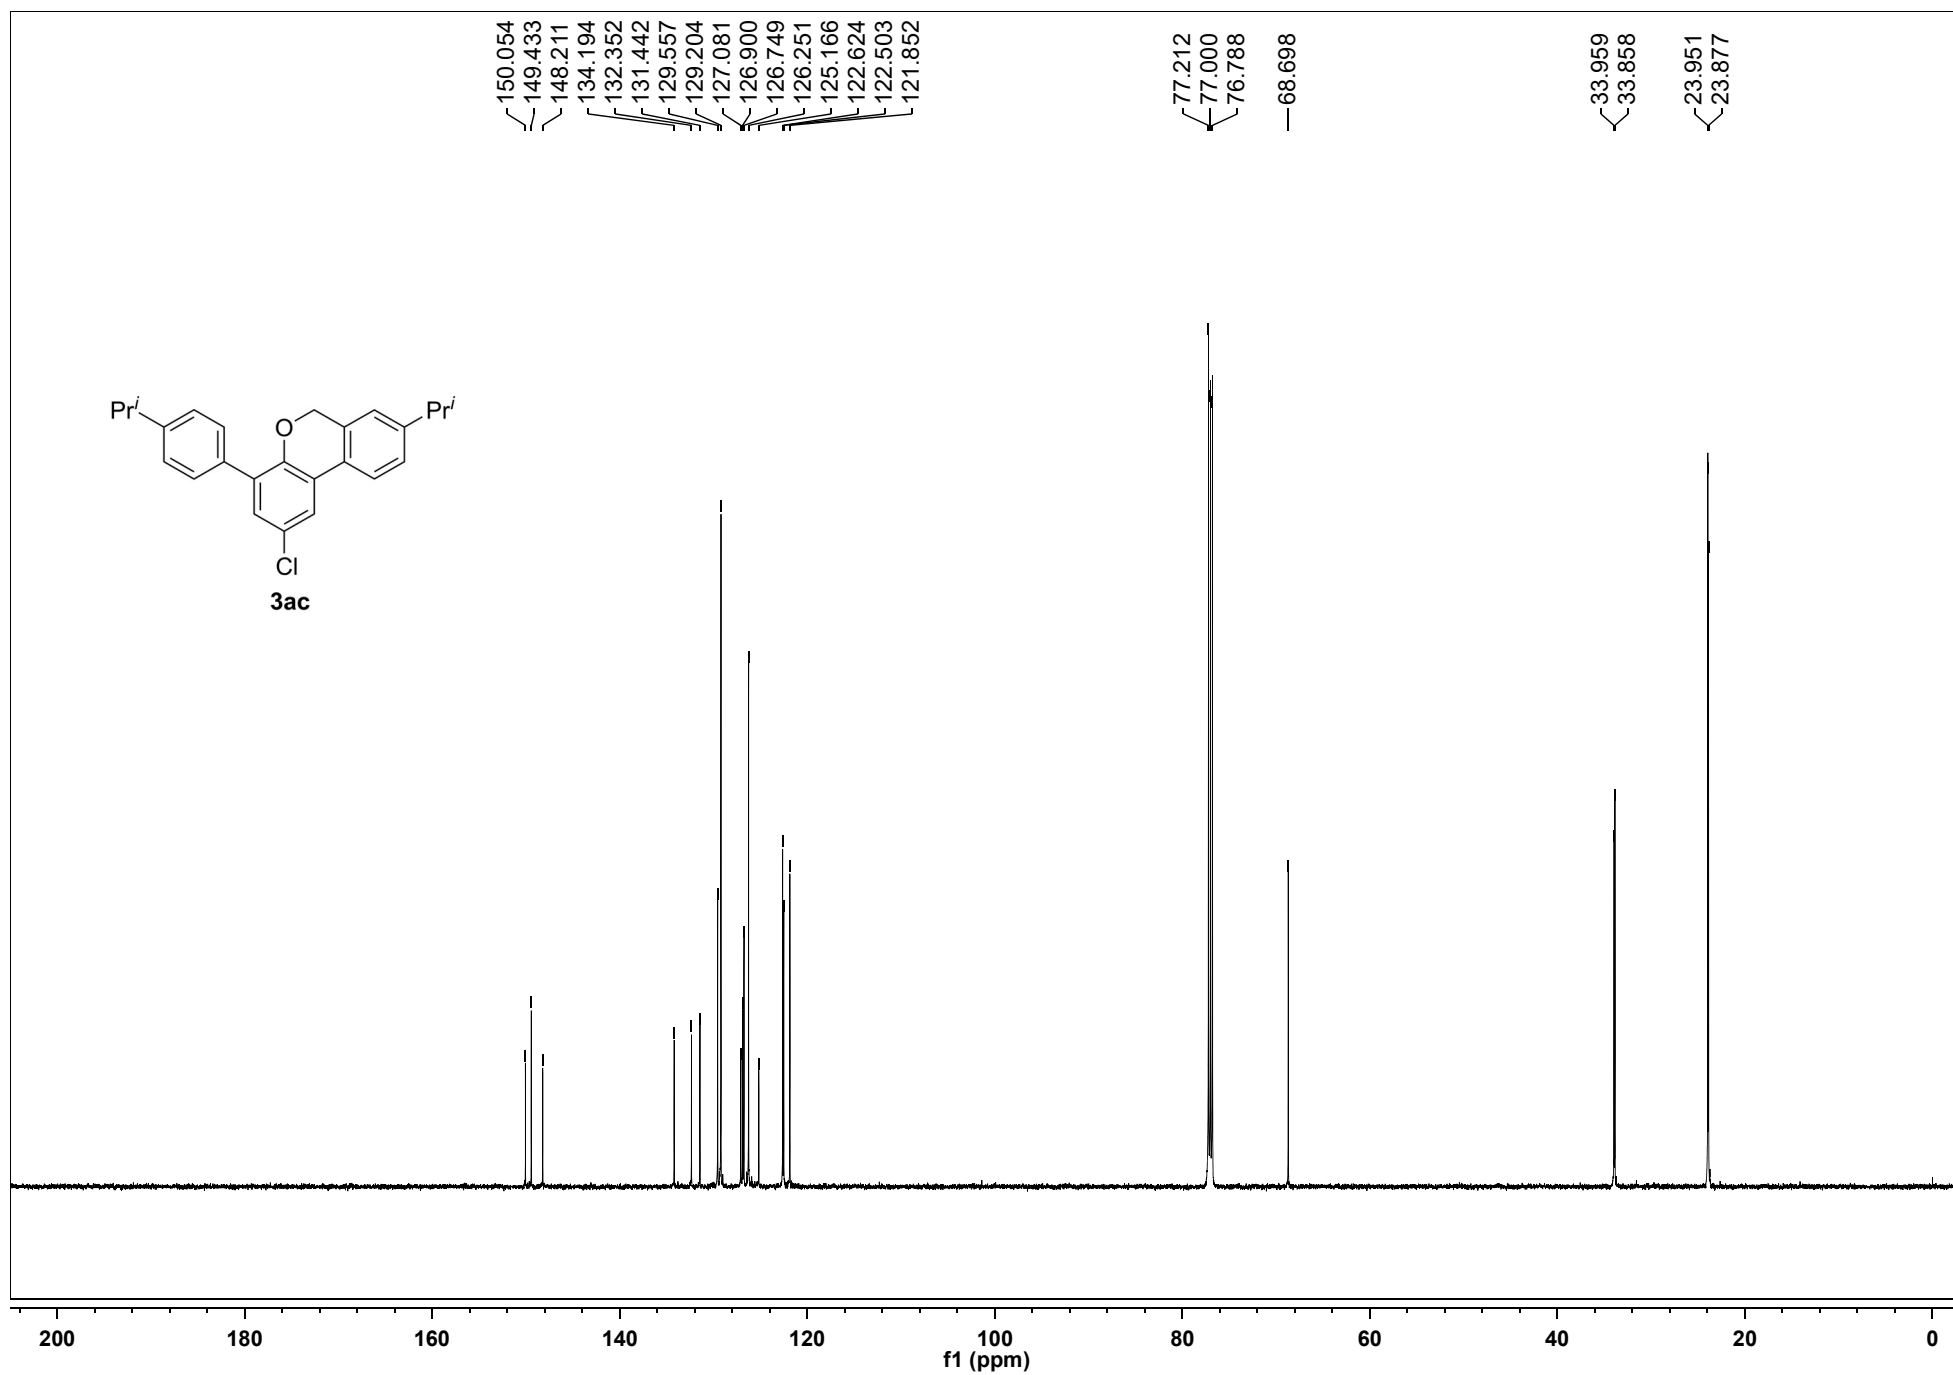



Figure S33. <sup>1</sup>H NMR spectrum (600 MHz, CDCl<sub>3</sub>) of 3ad

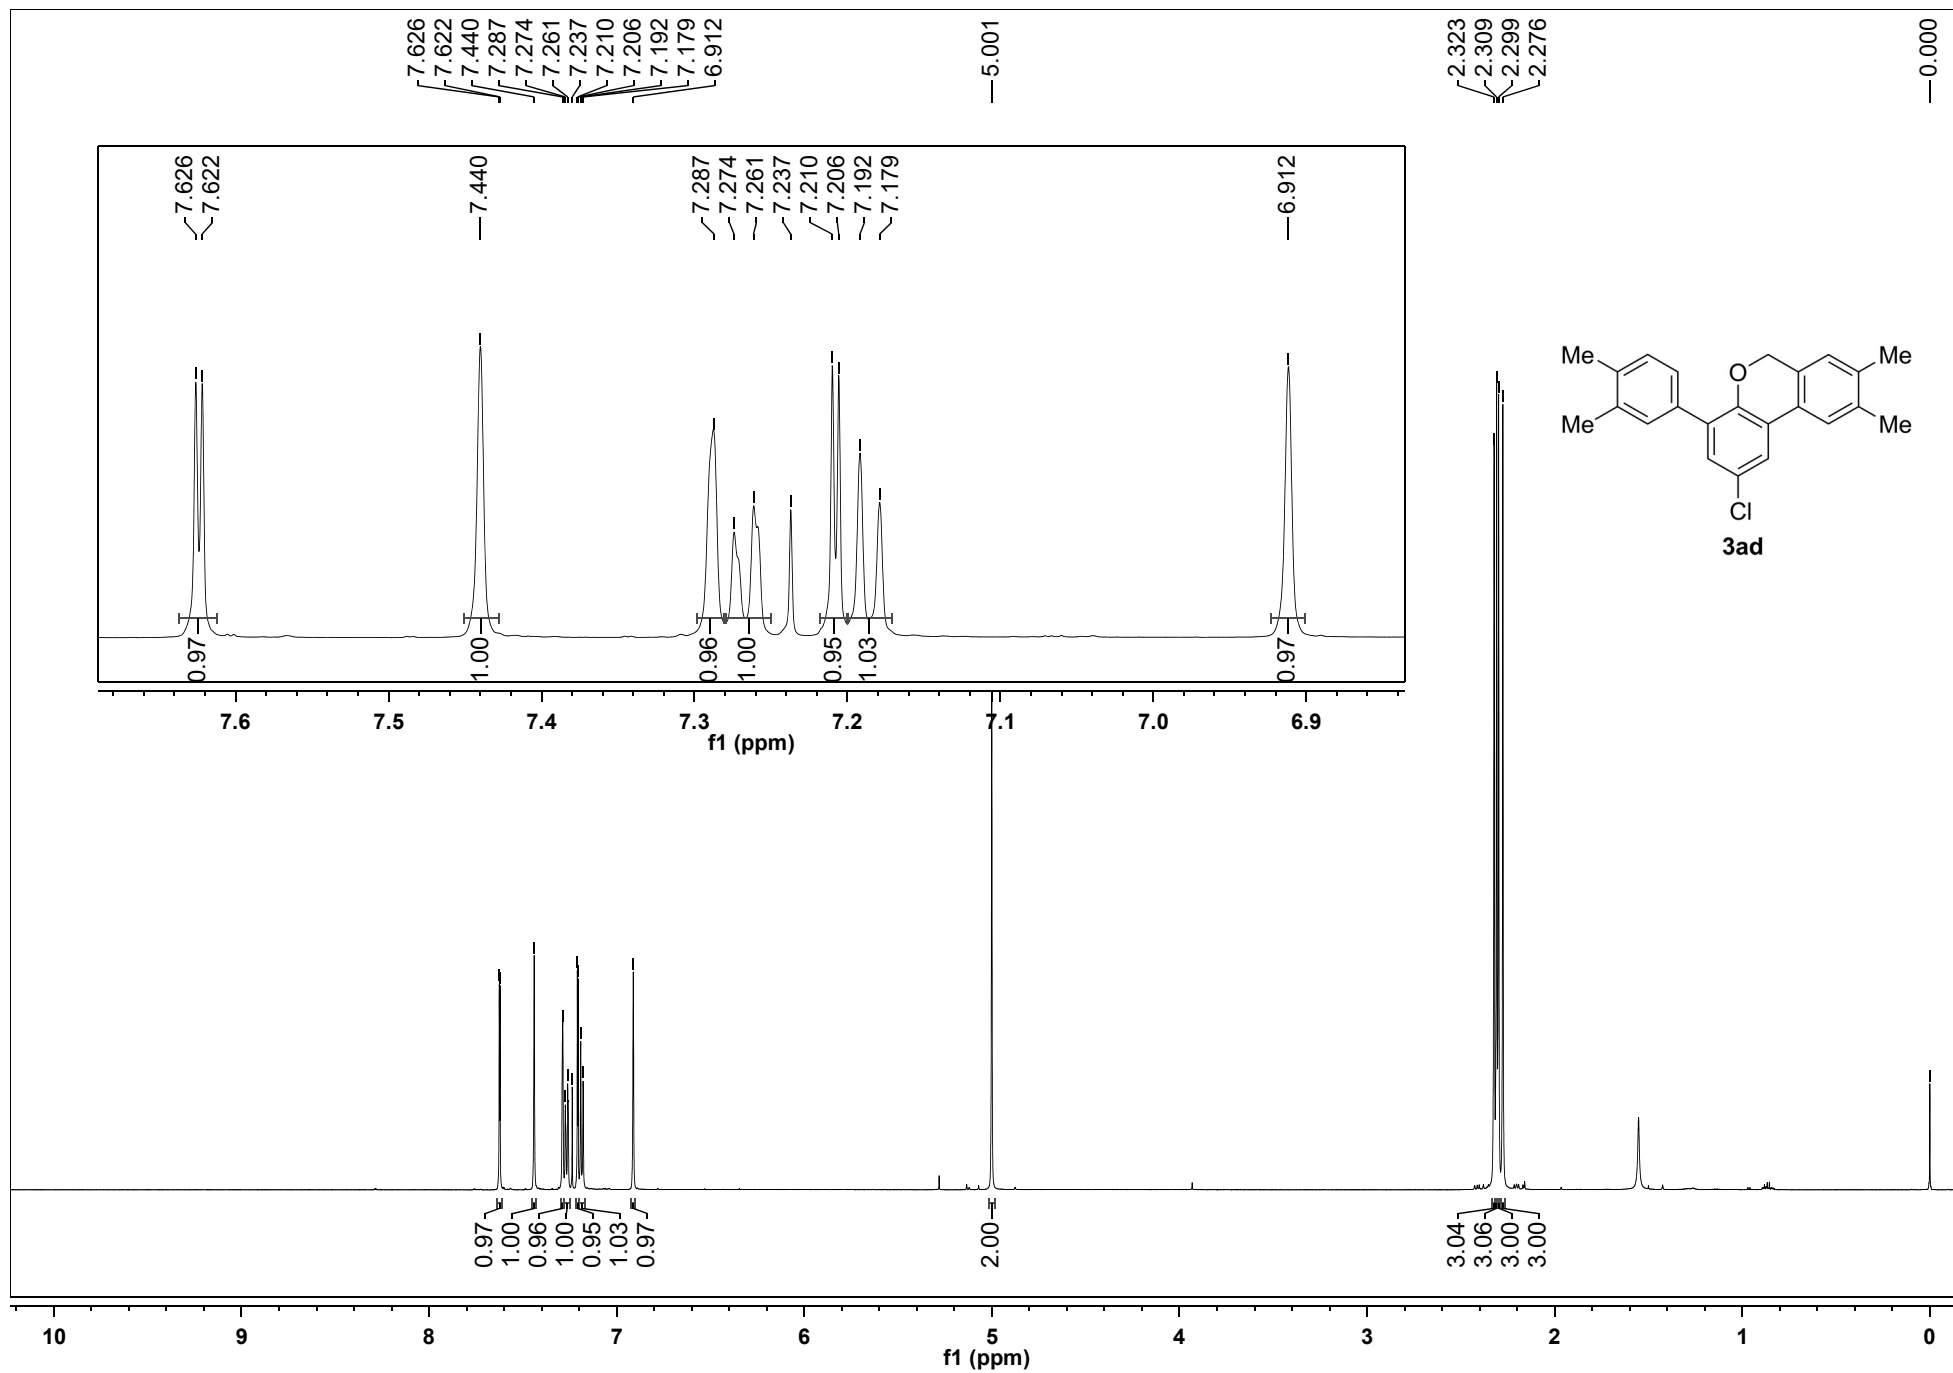

Figure S34.  $^{13}\text{C}\{^1\text{H}\}$  NMR spectrum (150 MHz,  $\text{CDCl}_3$ ) of 3ad

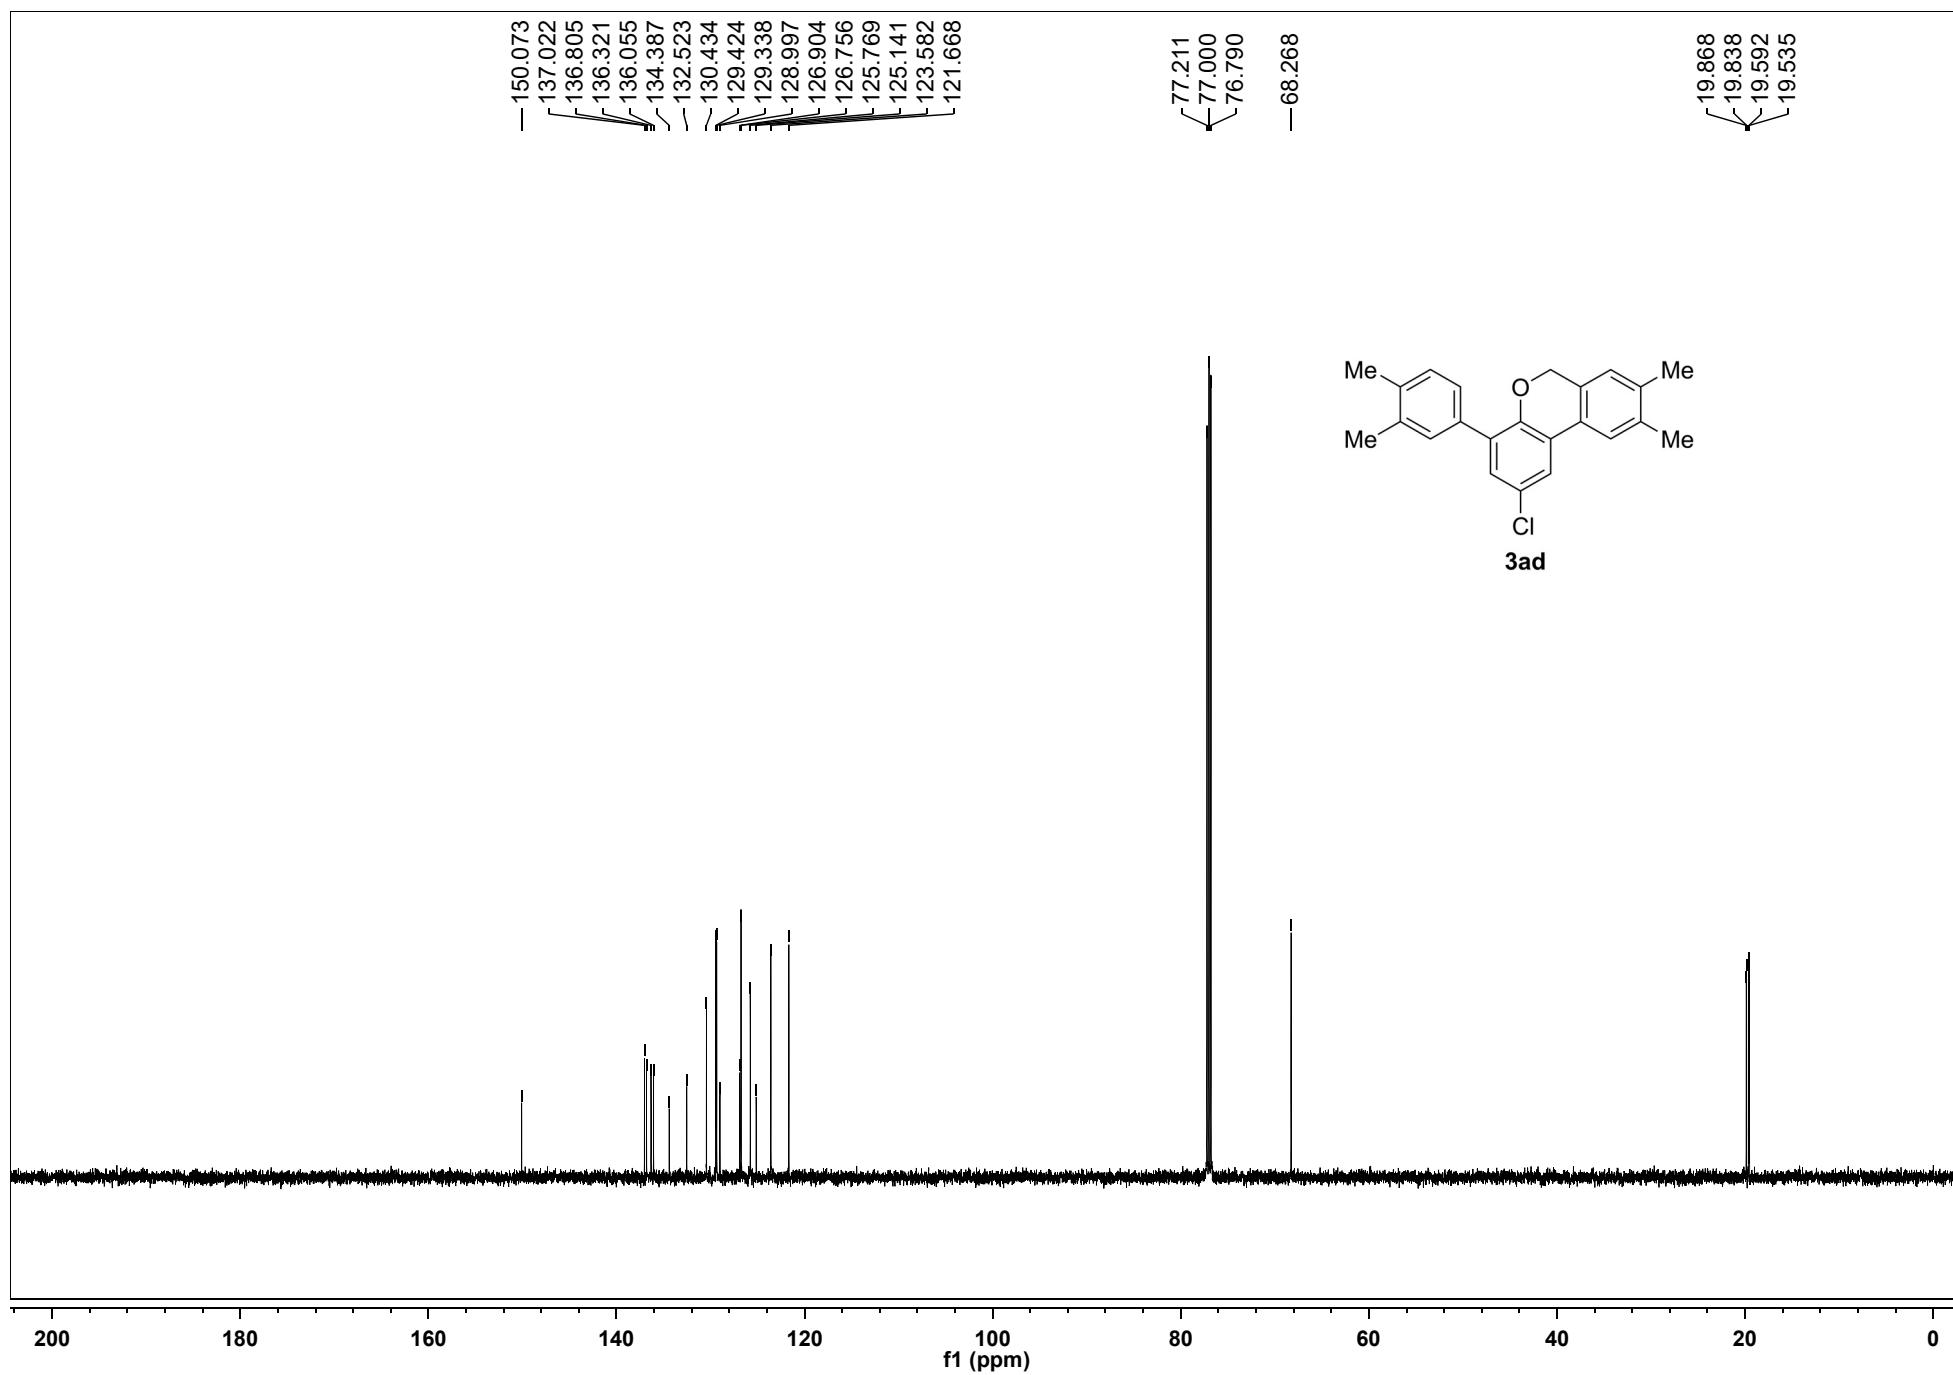

Figure S35. <sup>1</sup>H NMR spectrum (600 MHz, CDCl<sub>3</sub>) of 3ae

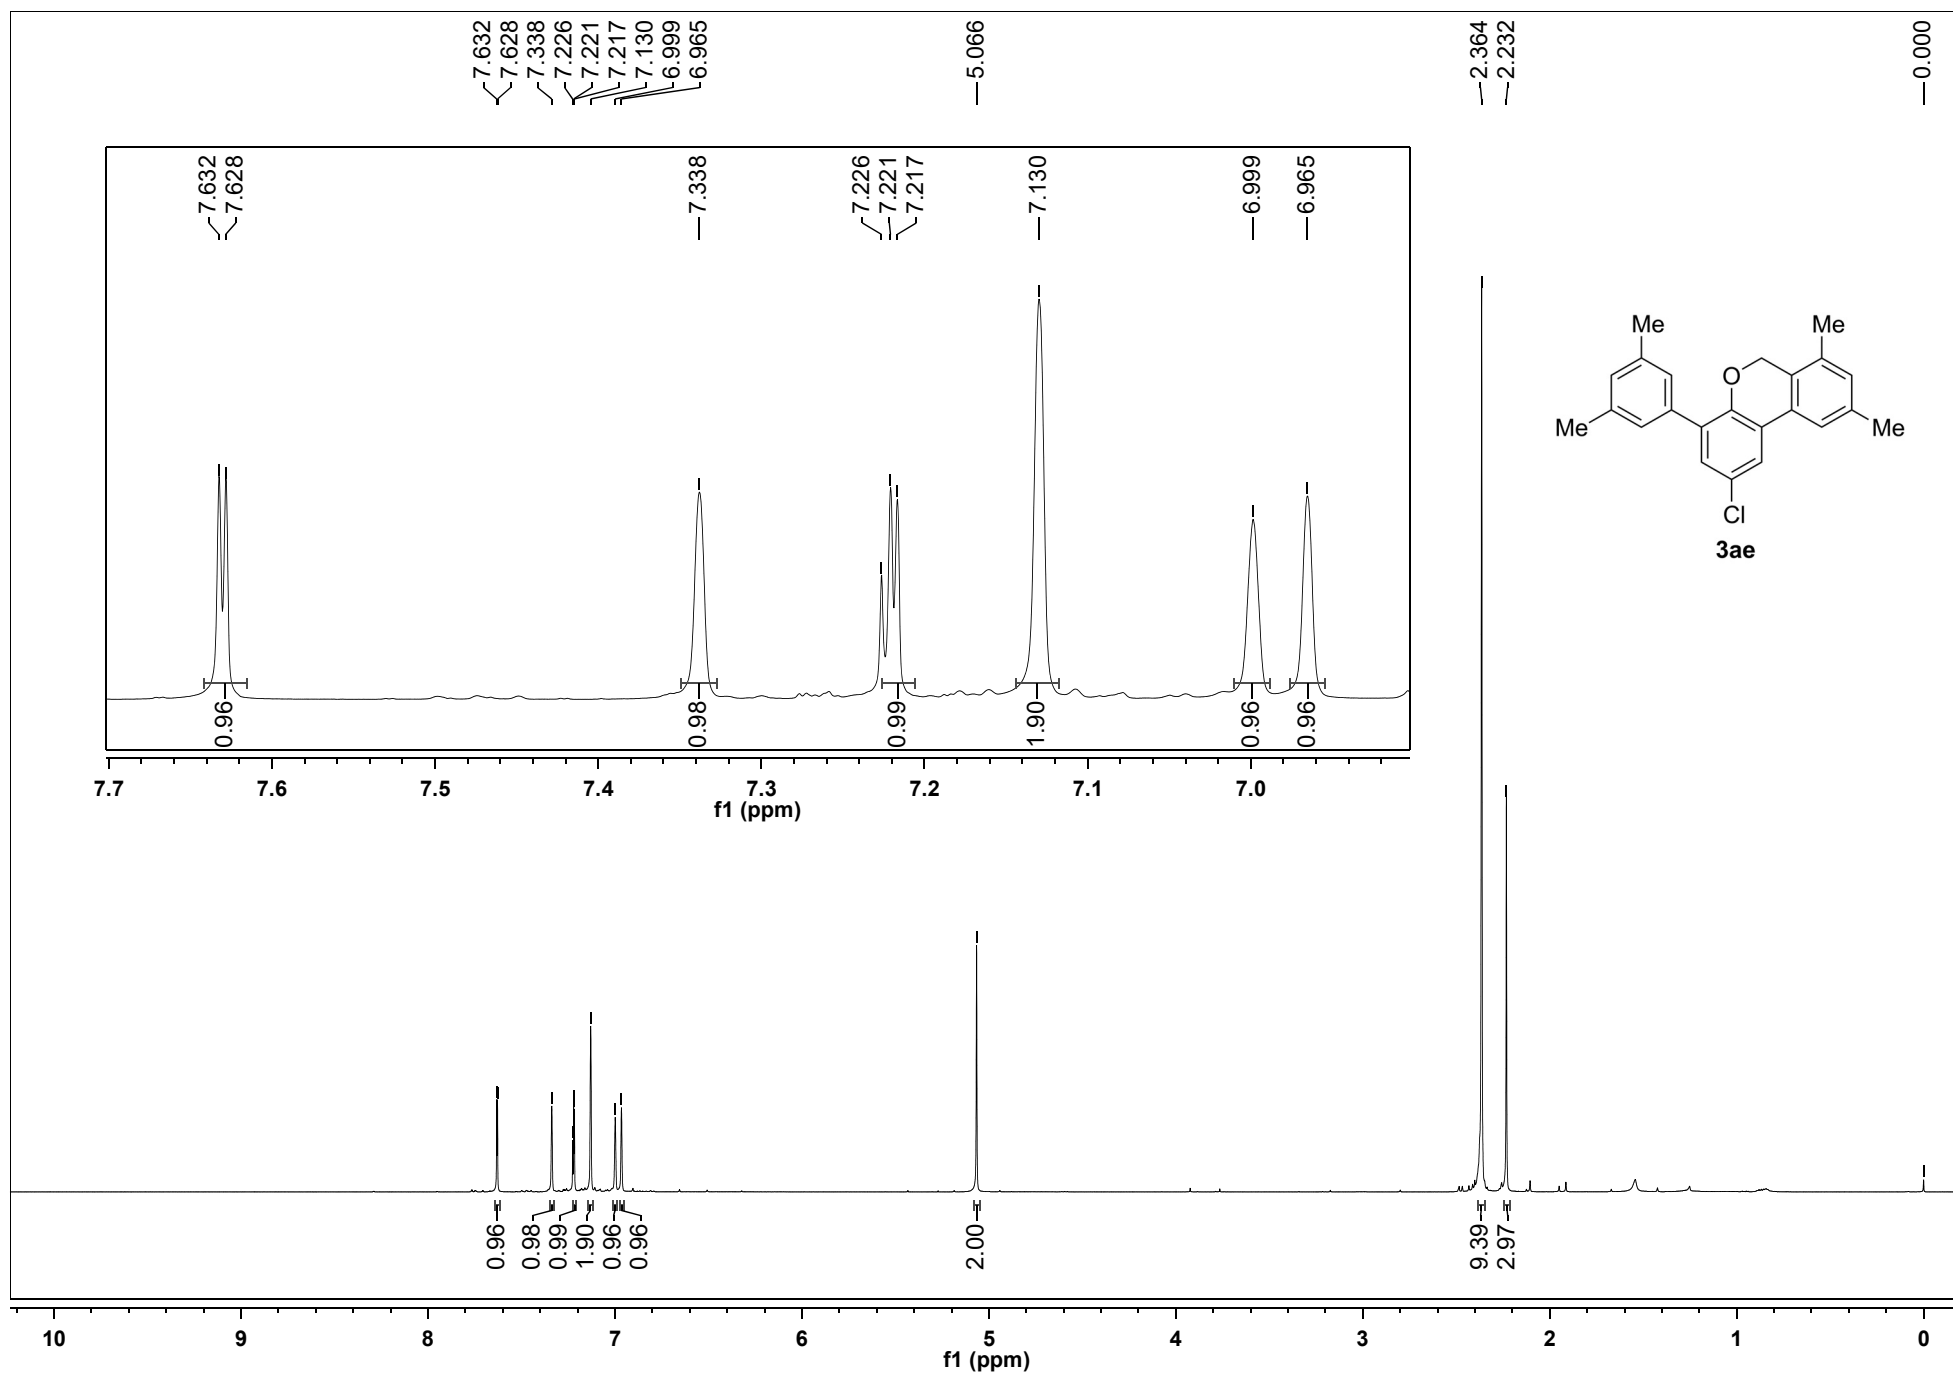

Figure S36.  $^{13}\text{C}\{^1\text{H}\}$  NMR spectrum (150 MHz,  $\text{CDCl}_3$ ) of 3ae

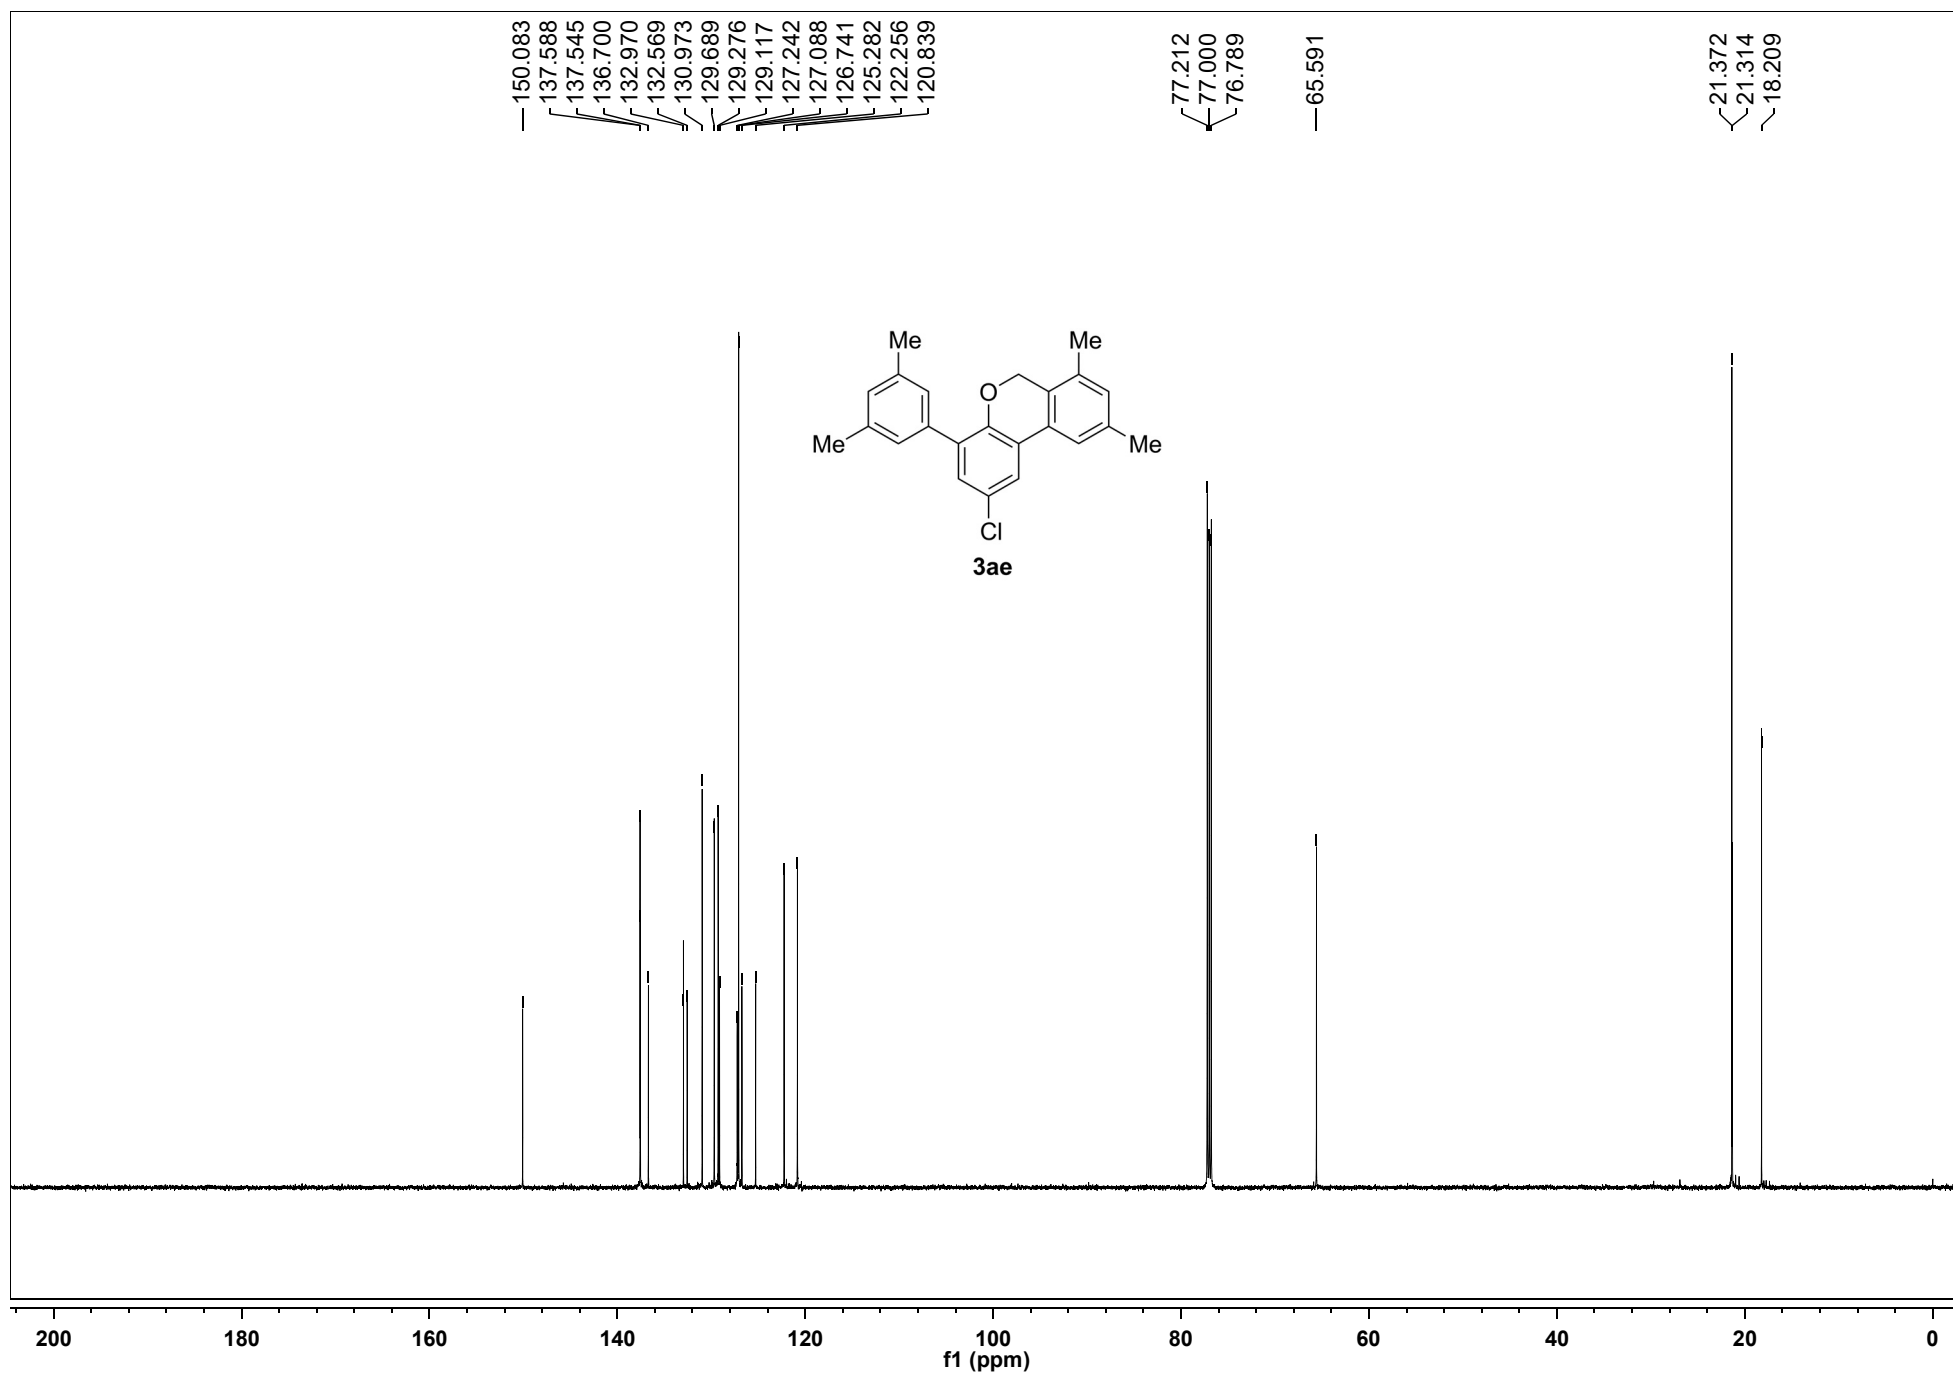

Figure S37. <sup>1</sup>H NMR spectrum (600 MHz, CDCl<sub>3</sub>) of 3af

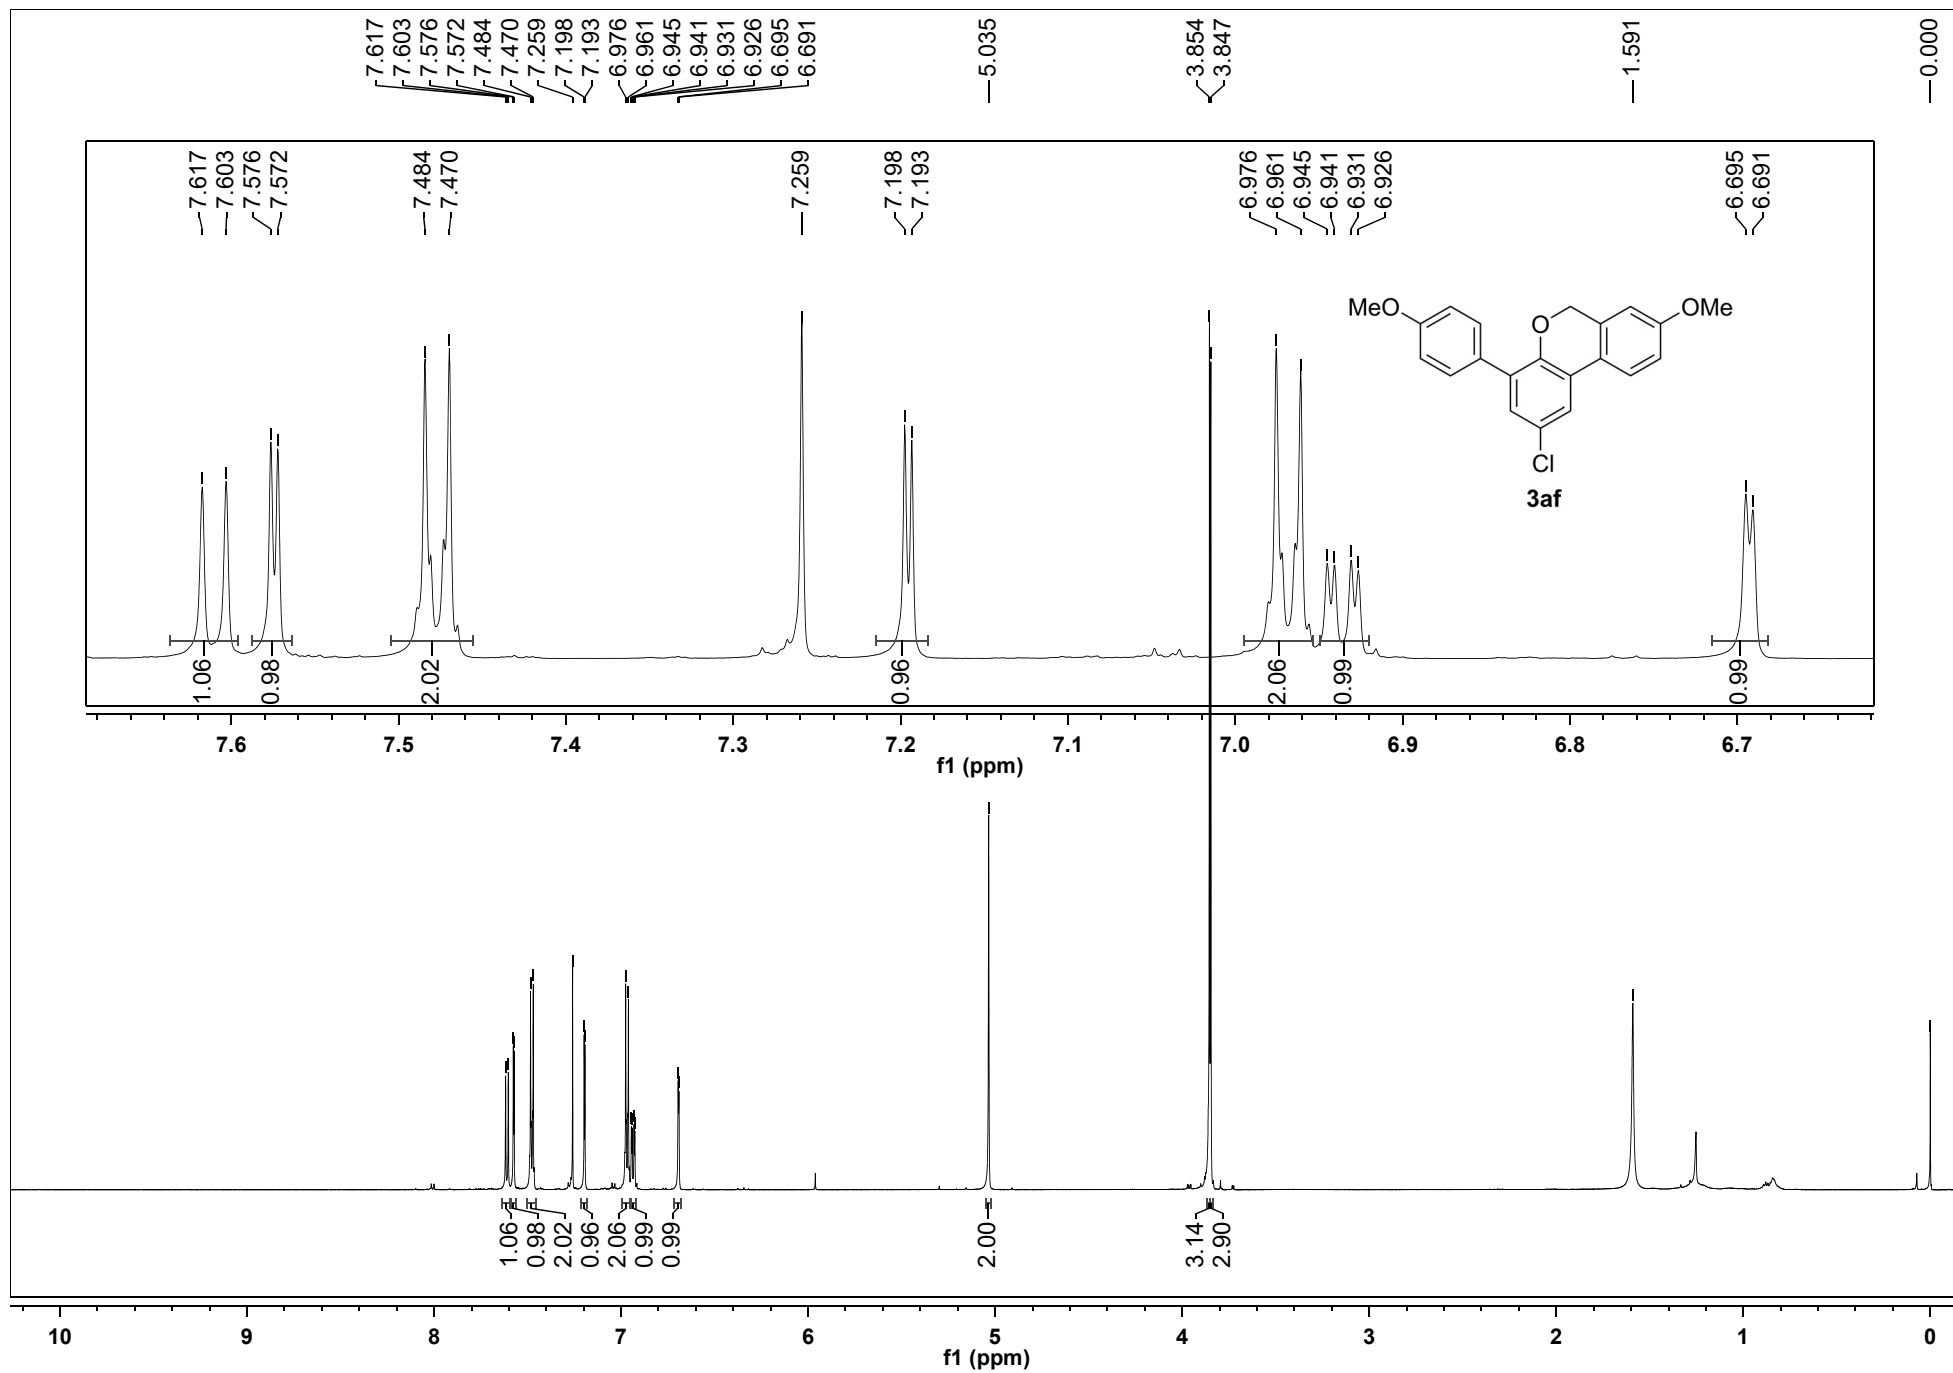

Figure S38.  $^{13}\text{C}\{^1\text{H}\}$  NMR spectrum (150 MHz,  $\text{CDCl}_3$ ) of 3af

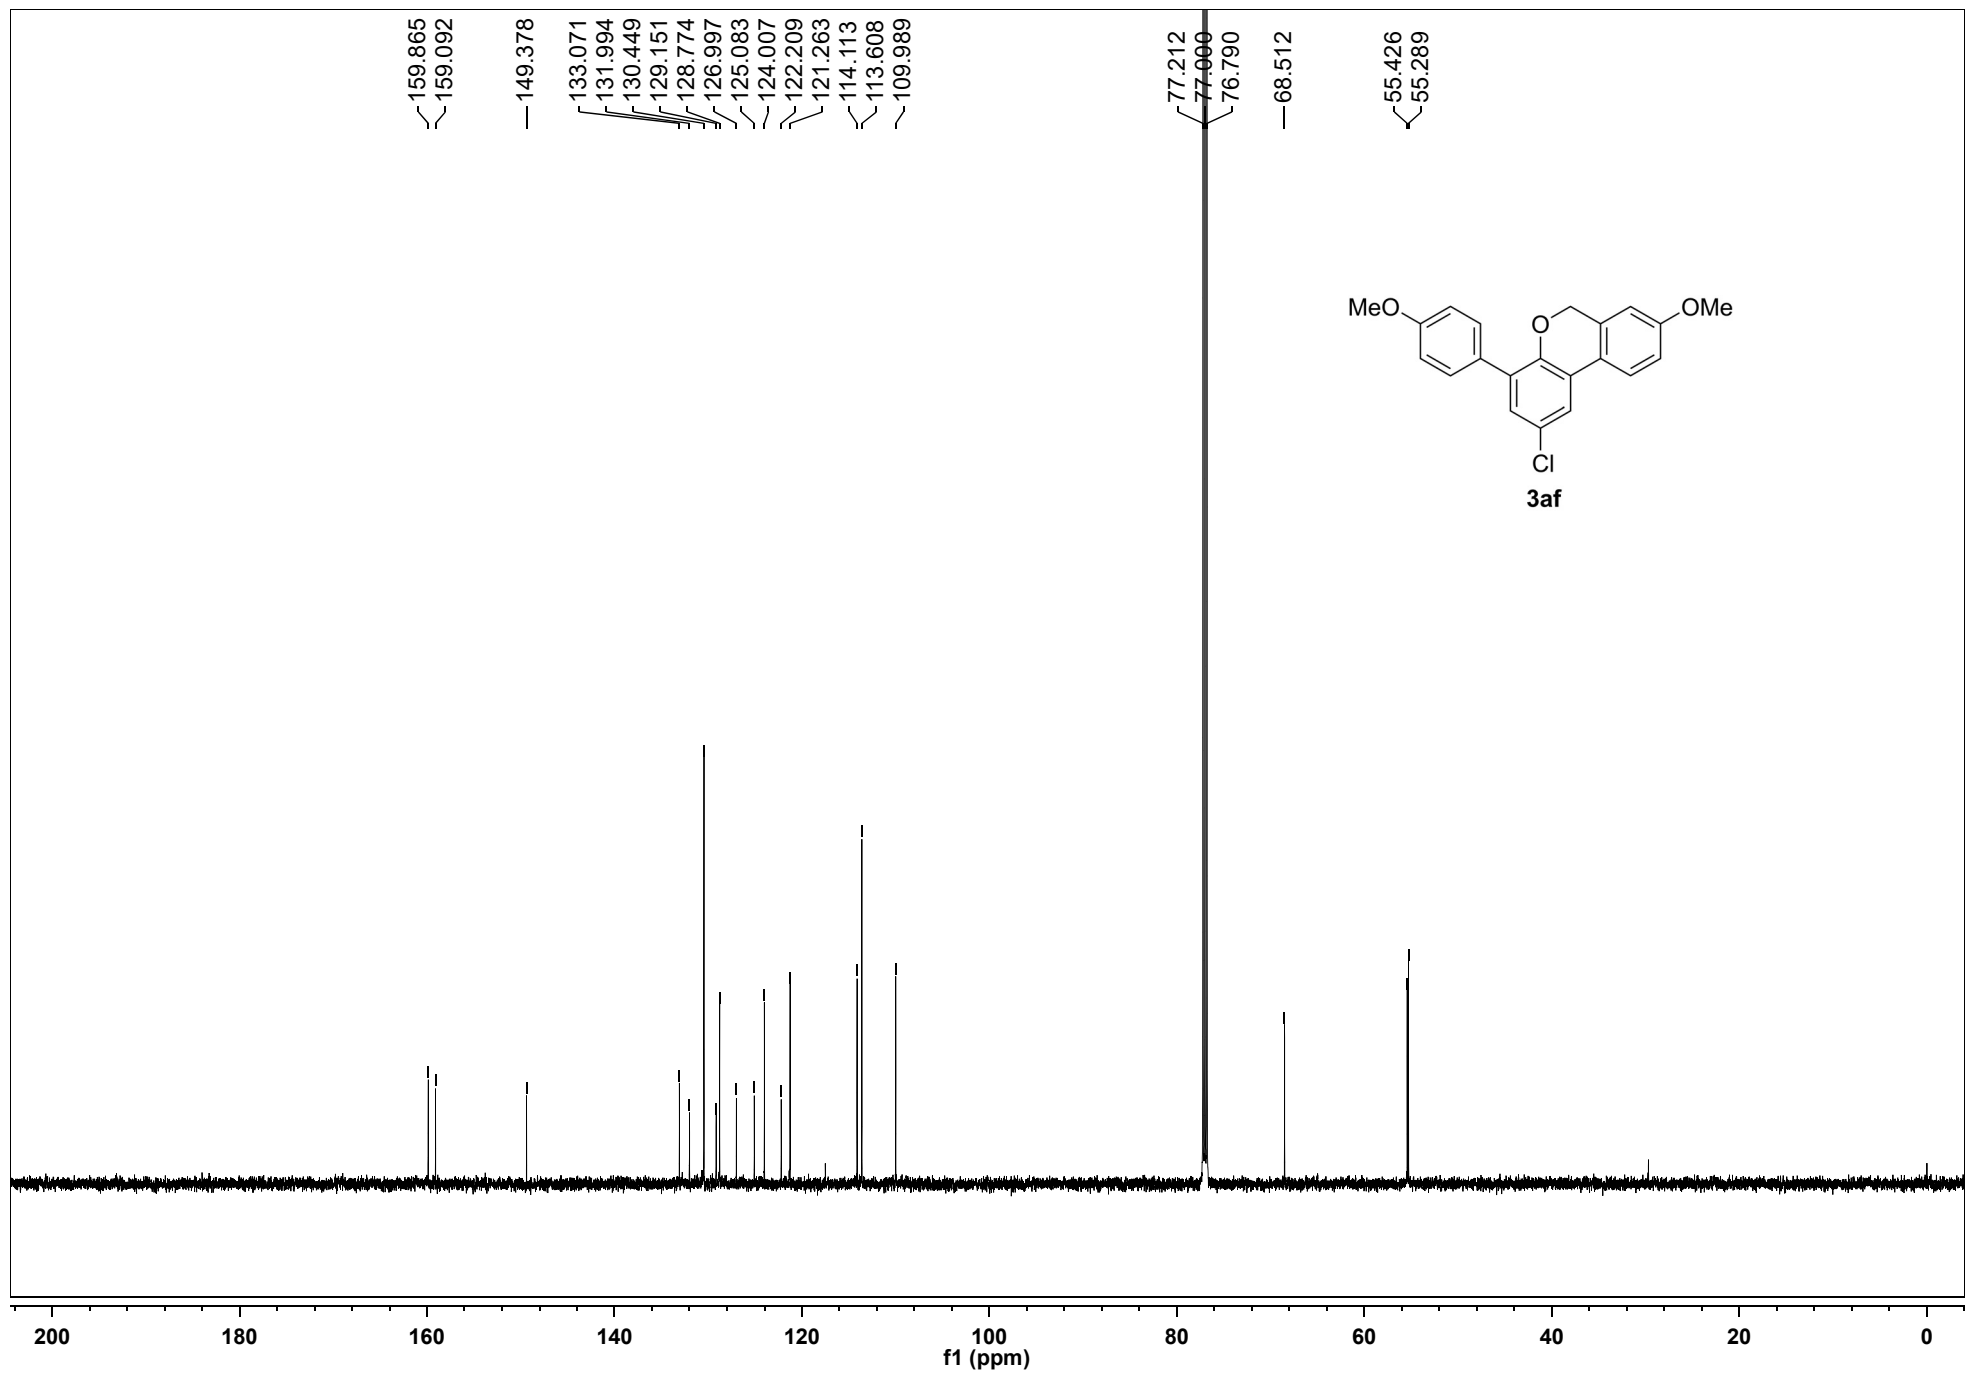

Figure S39. <sup>1</sup>H NMR spectrum (600 MHz, CDCl<sub>3</sub>) of 3ag

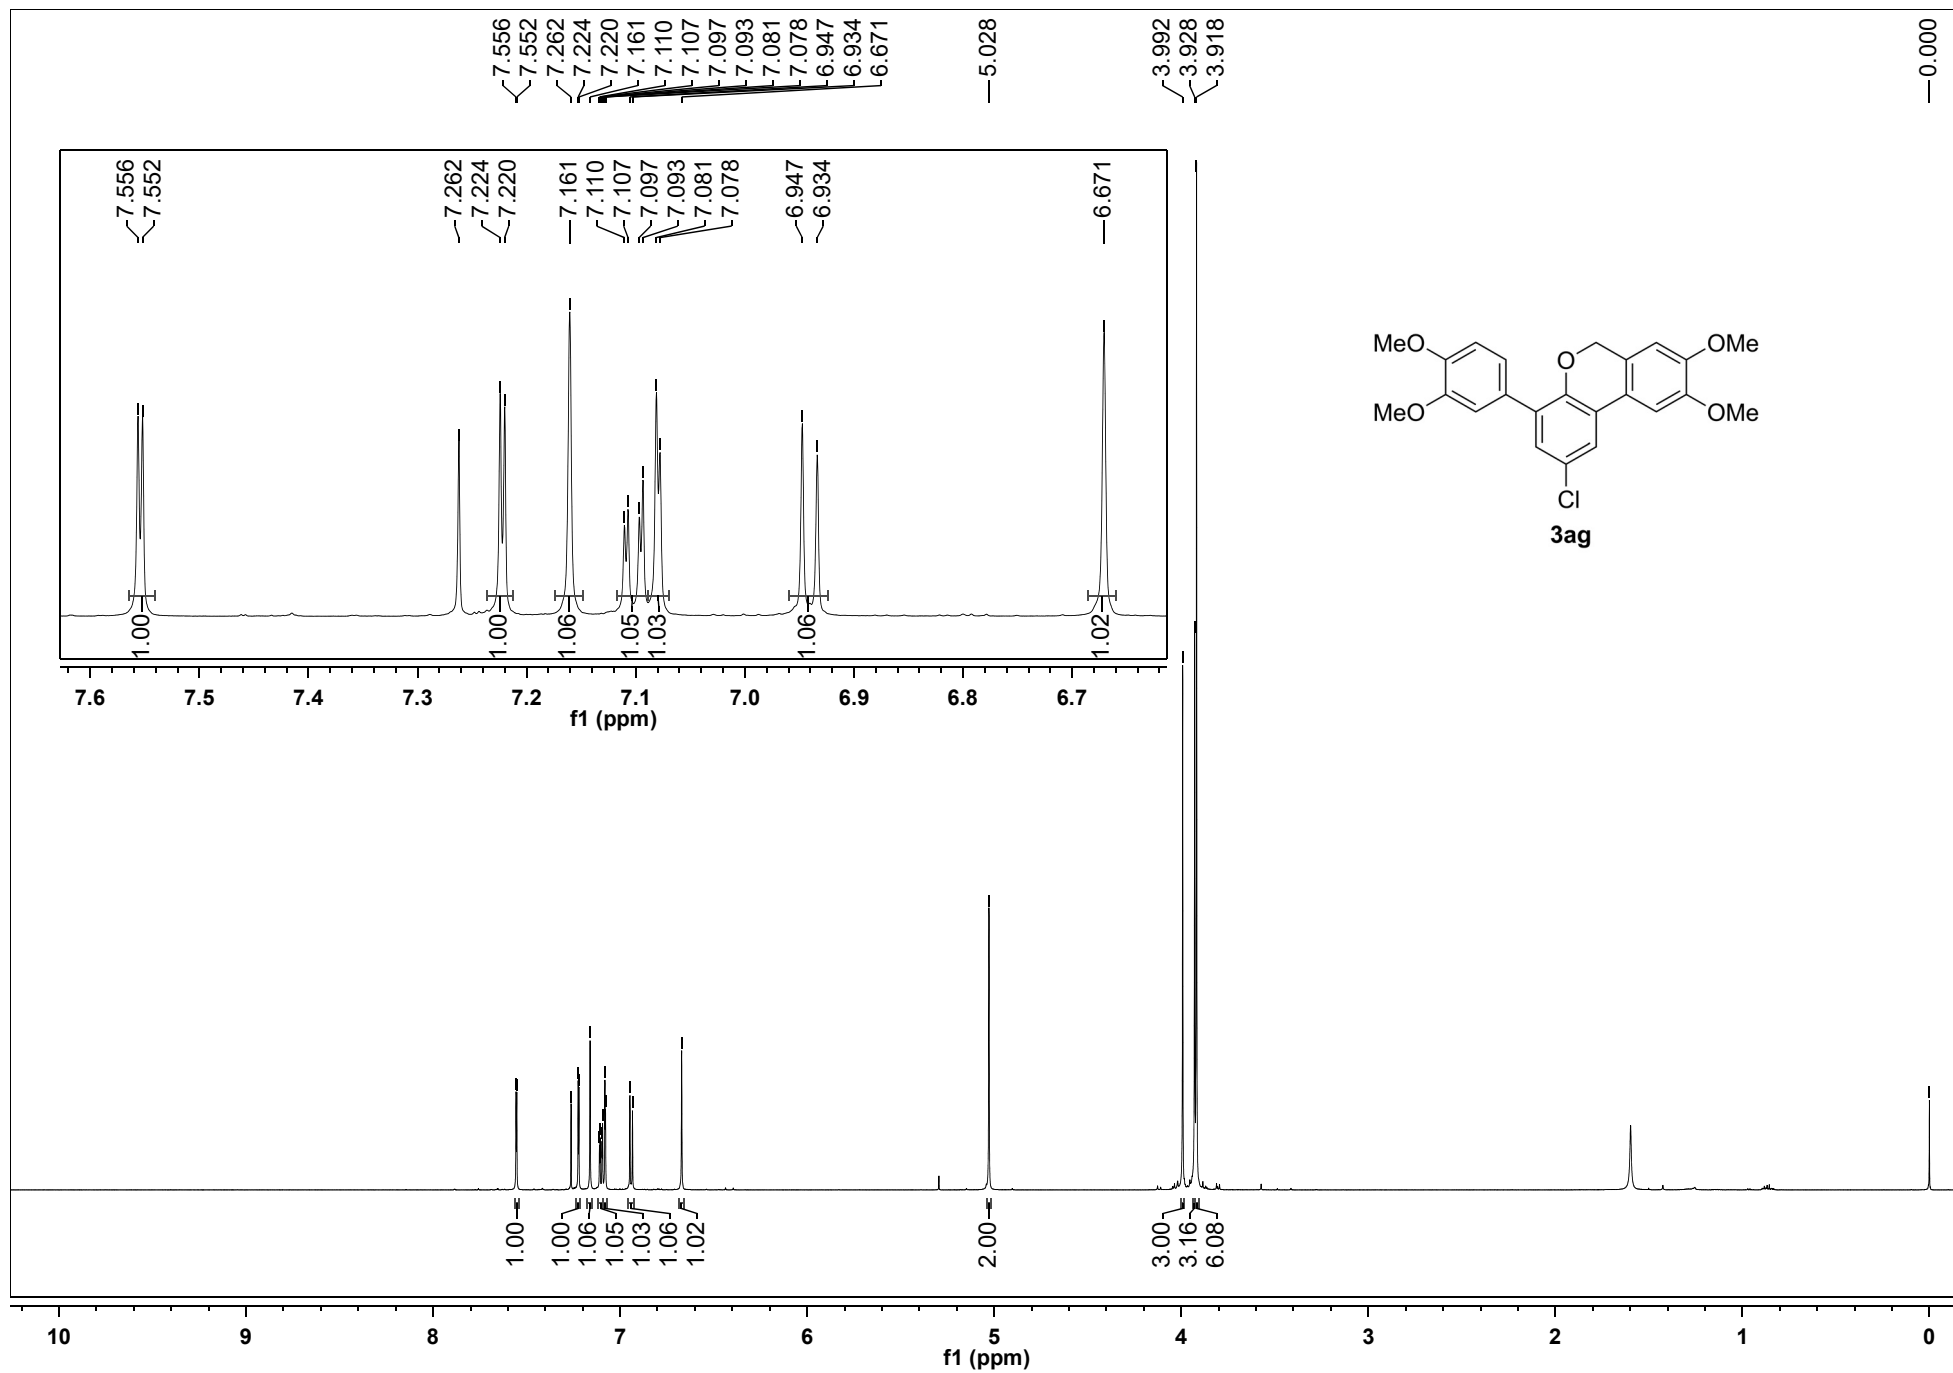

Figure S40.  $^{13}\text{C}\{^1\text{H}\}$  NMR spectrum (150 MHz,  $\text{CDCl}_3$ ) of **3ag**

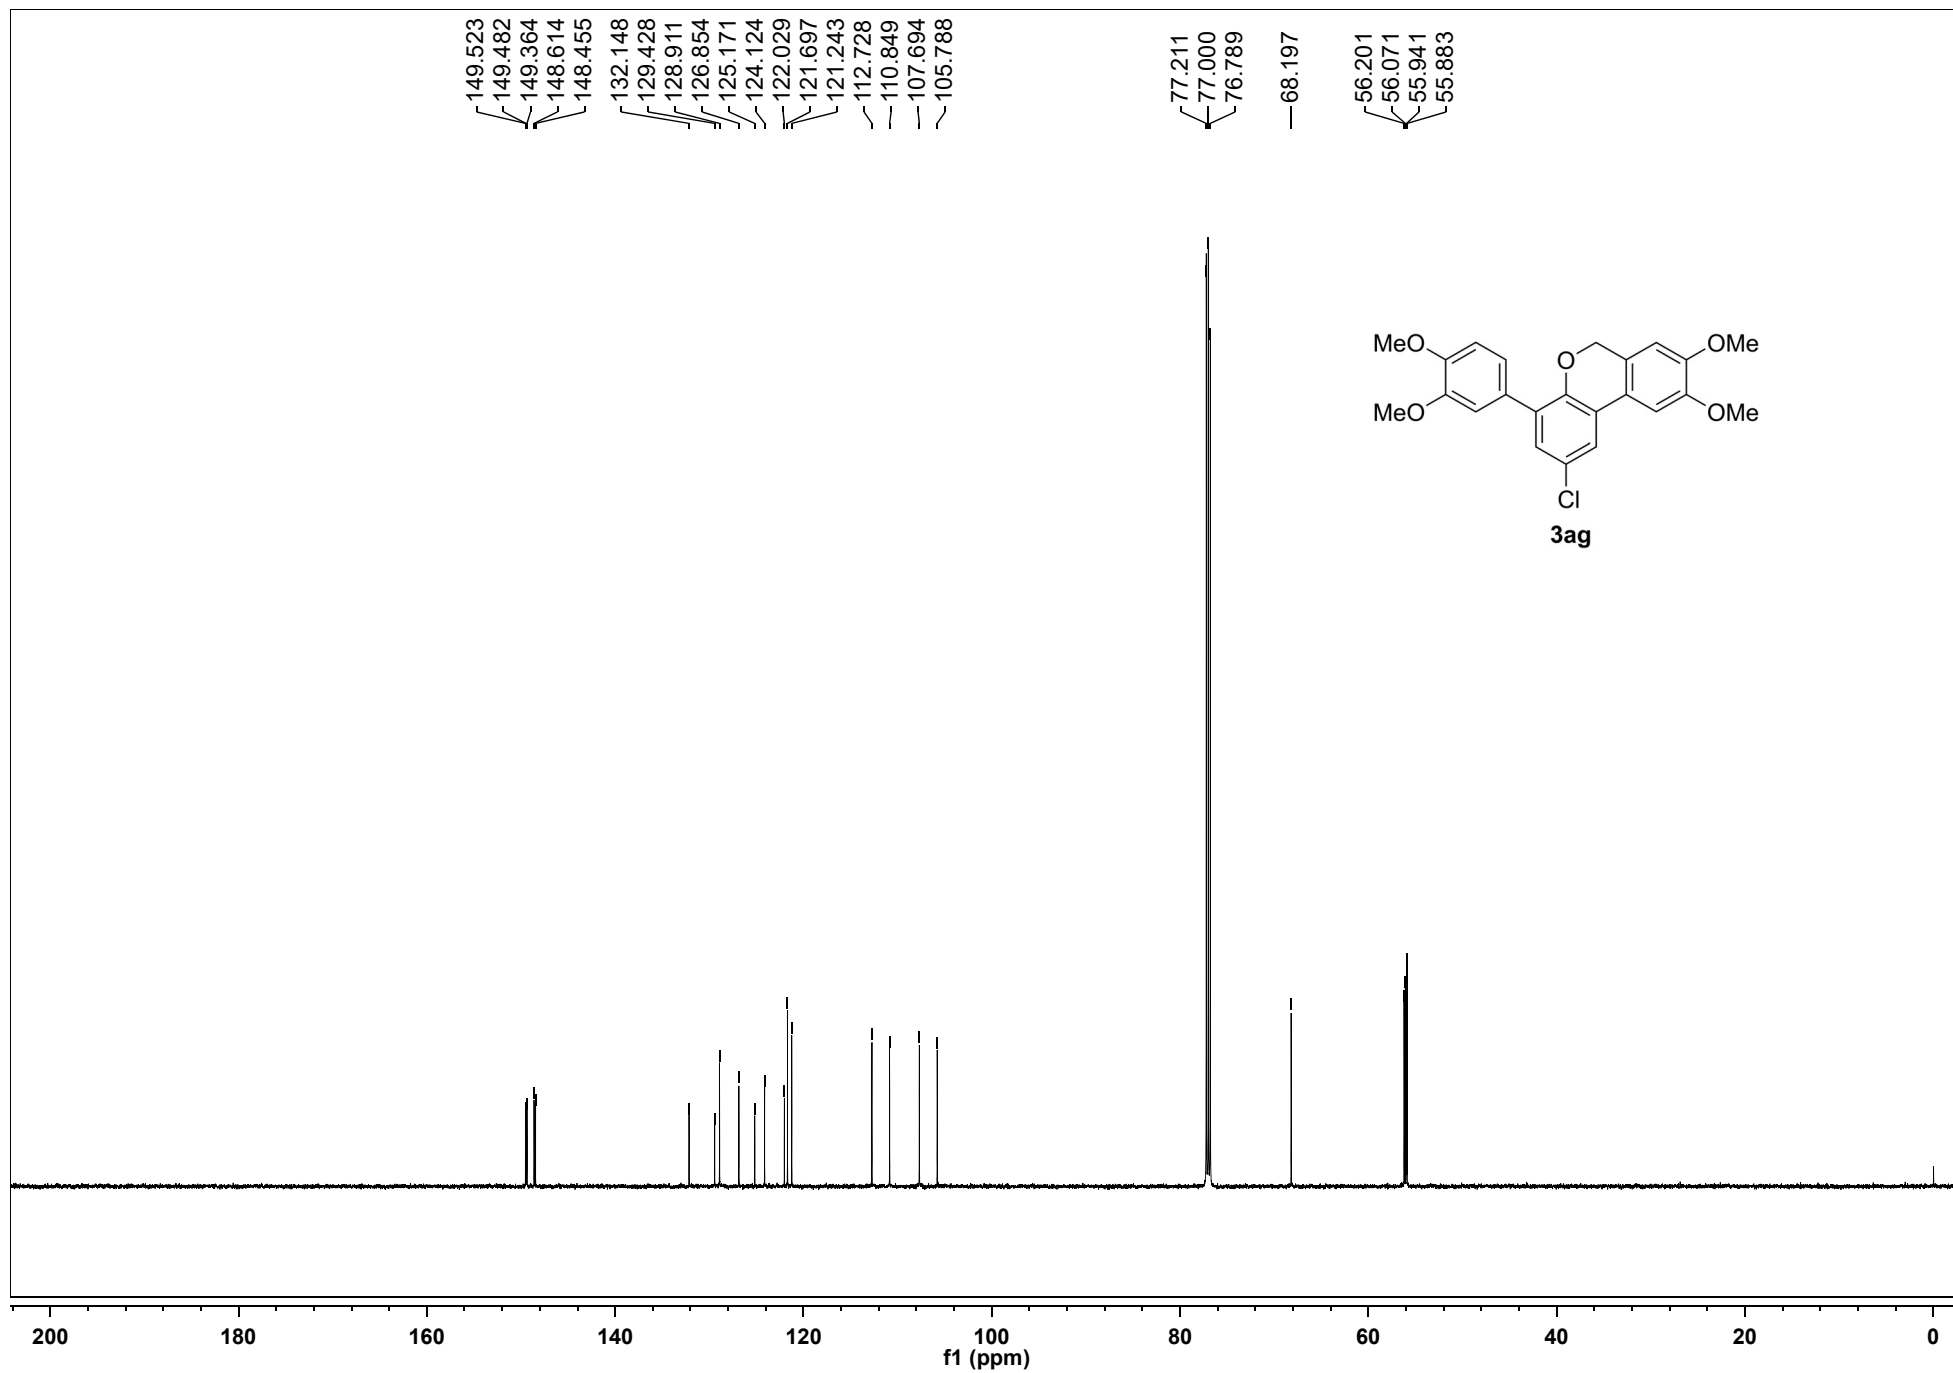



Figure S41. <sup>1</sup>H NMR spectrum (600 MHz, CDCl<sub>3</sub>) of 3ah

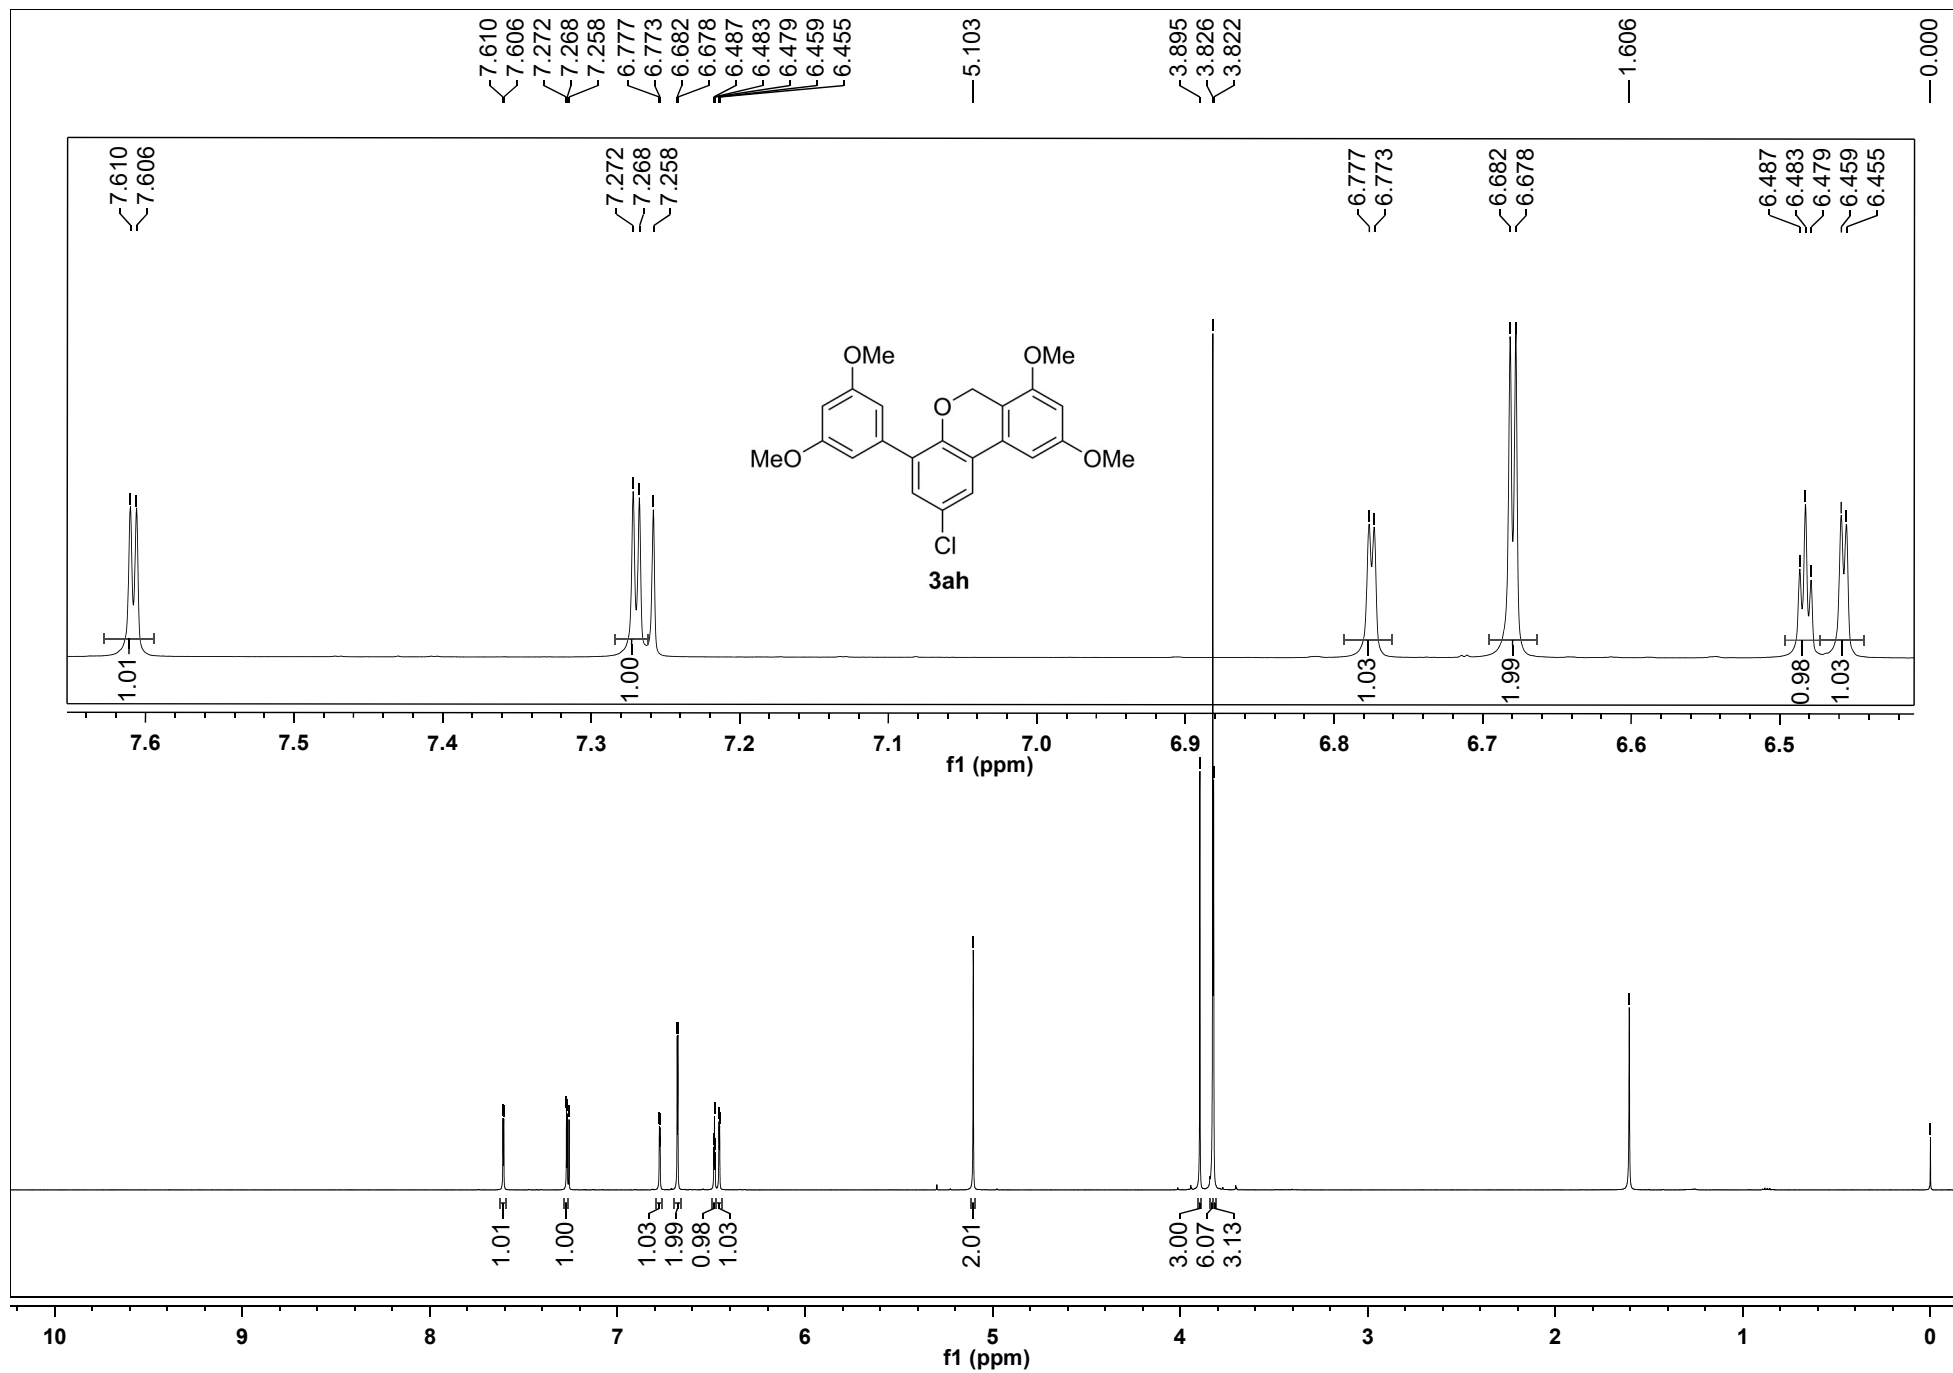

Figure S42.  $^{13}\text{C}\{^1\text{H}\}$  NMR spectrum (150 MHz,  $\text{CDCl}_3$ ) of 3ah

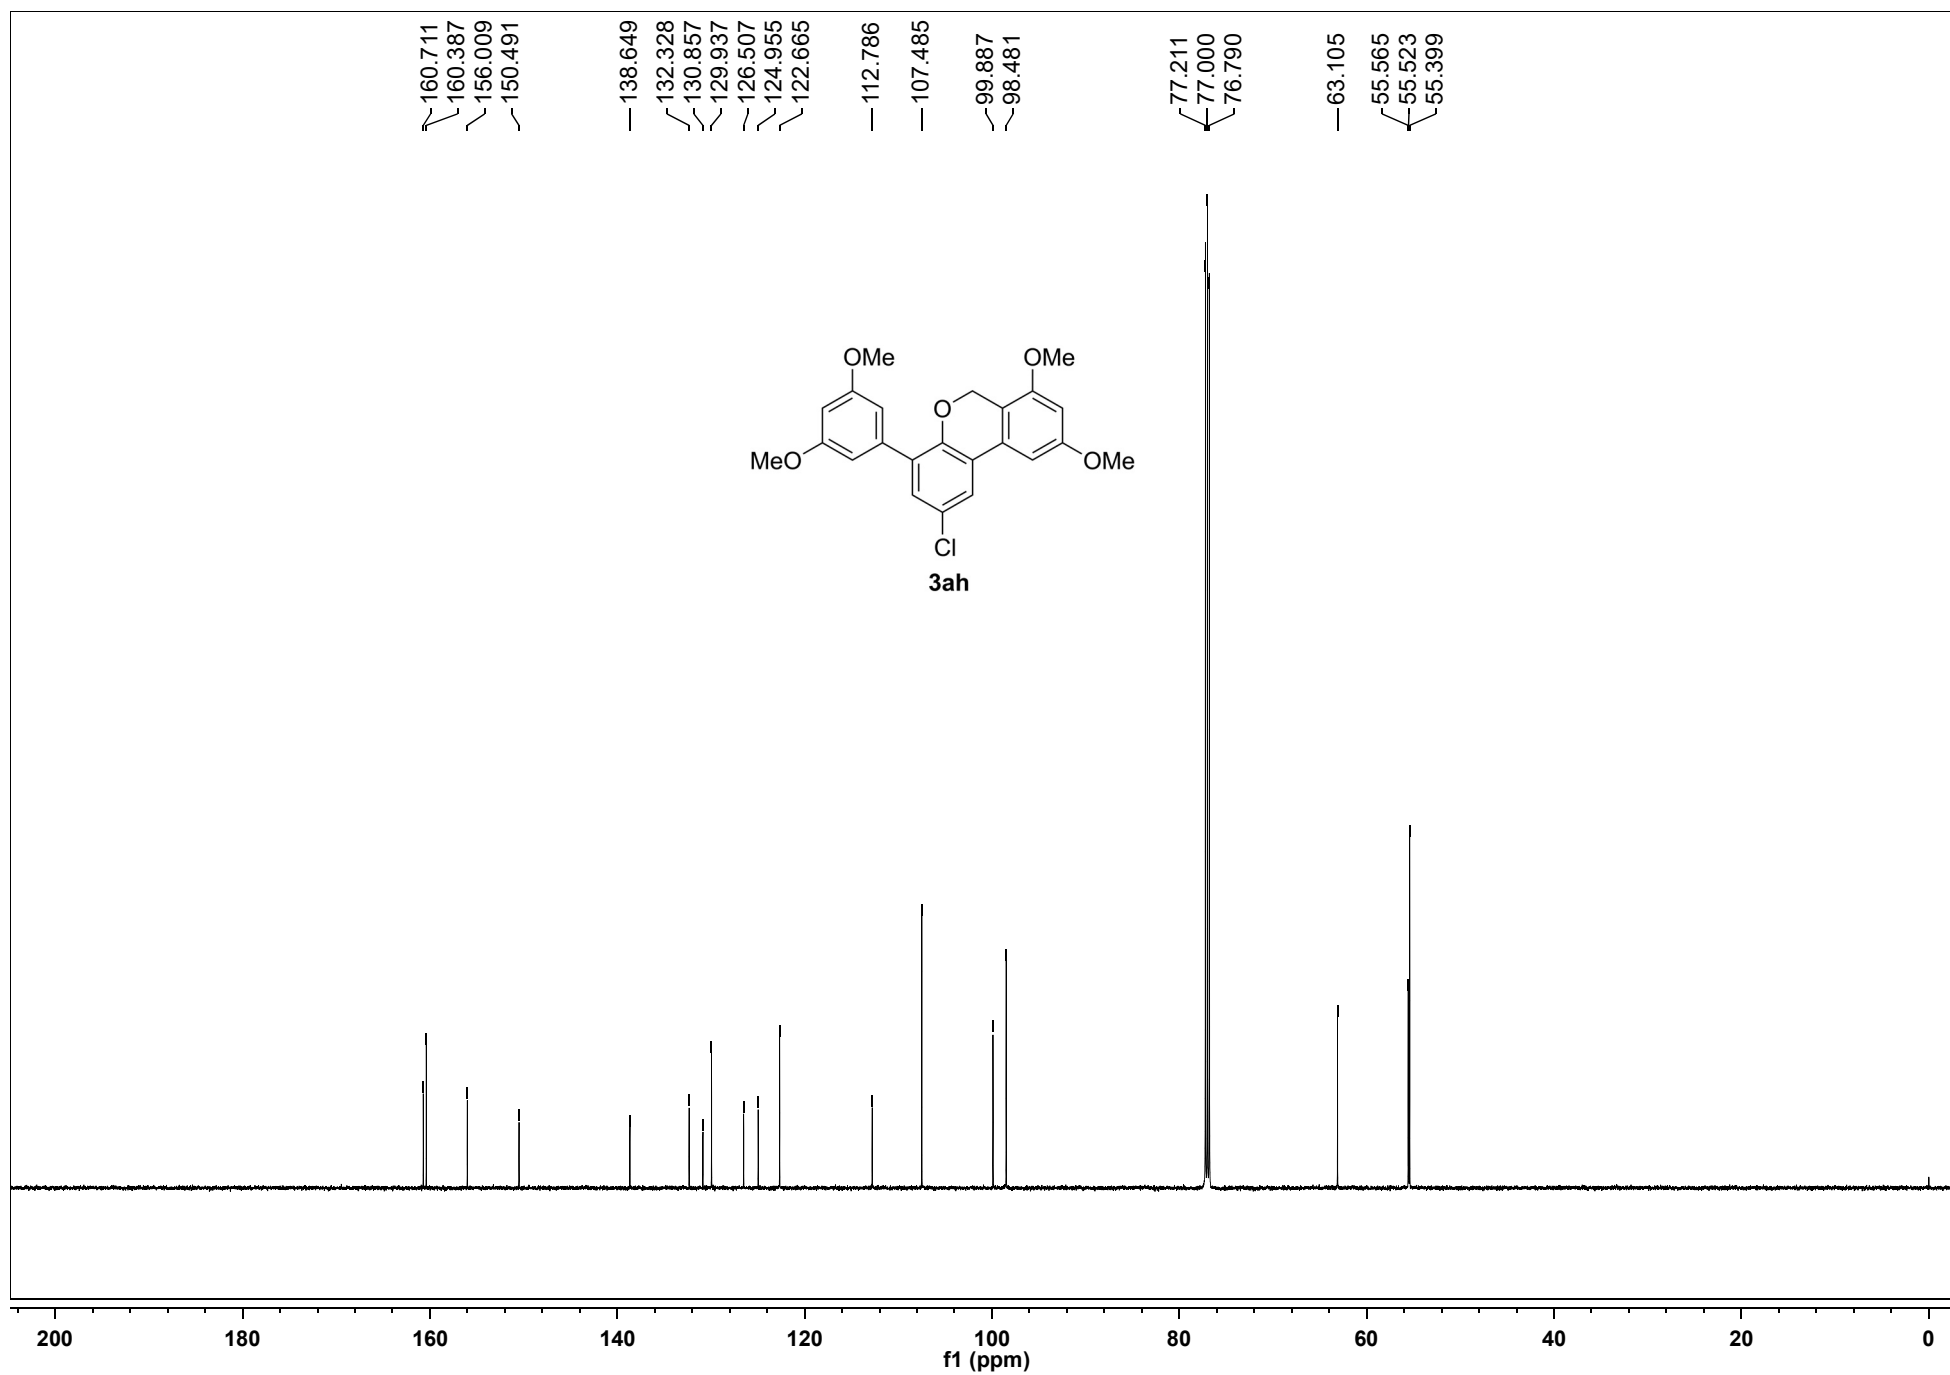

Figure S43. <sup>1</sup>H NMR spectrum (600 MHz, CDCl<sub>3</sub>) of 3ai

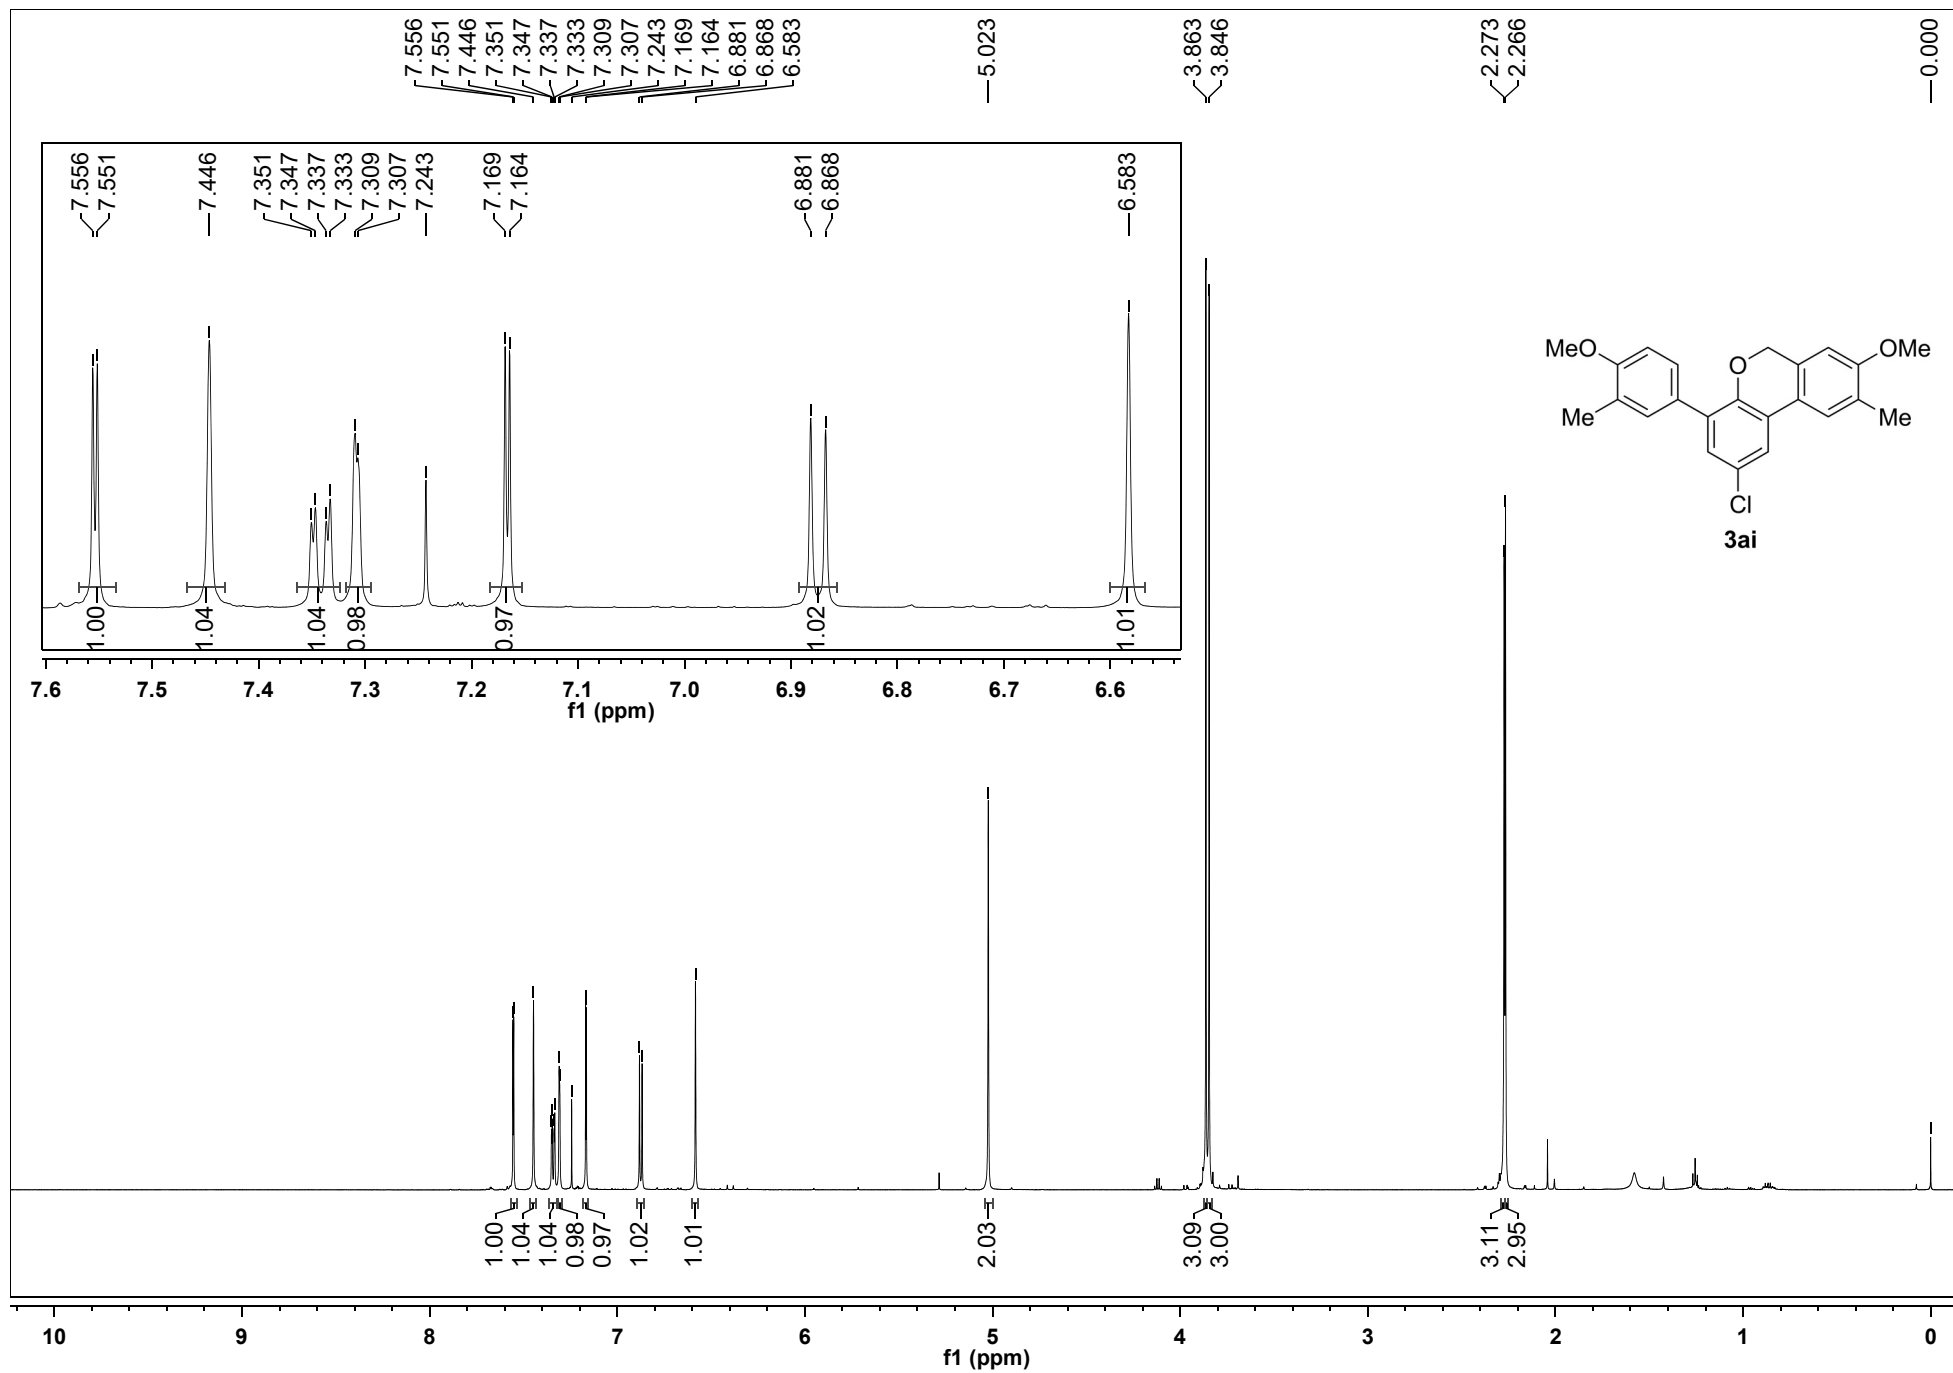

Figure S44.  $^{13}\text{C}\{^1\text{H}\}$  NMR spectrum (150 MHz,  $\text{CDCl}_3$ ) of 3ai

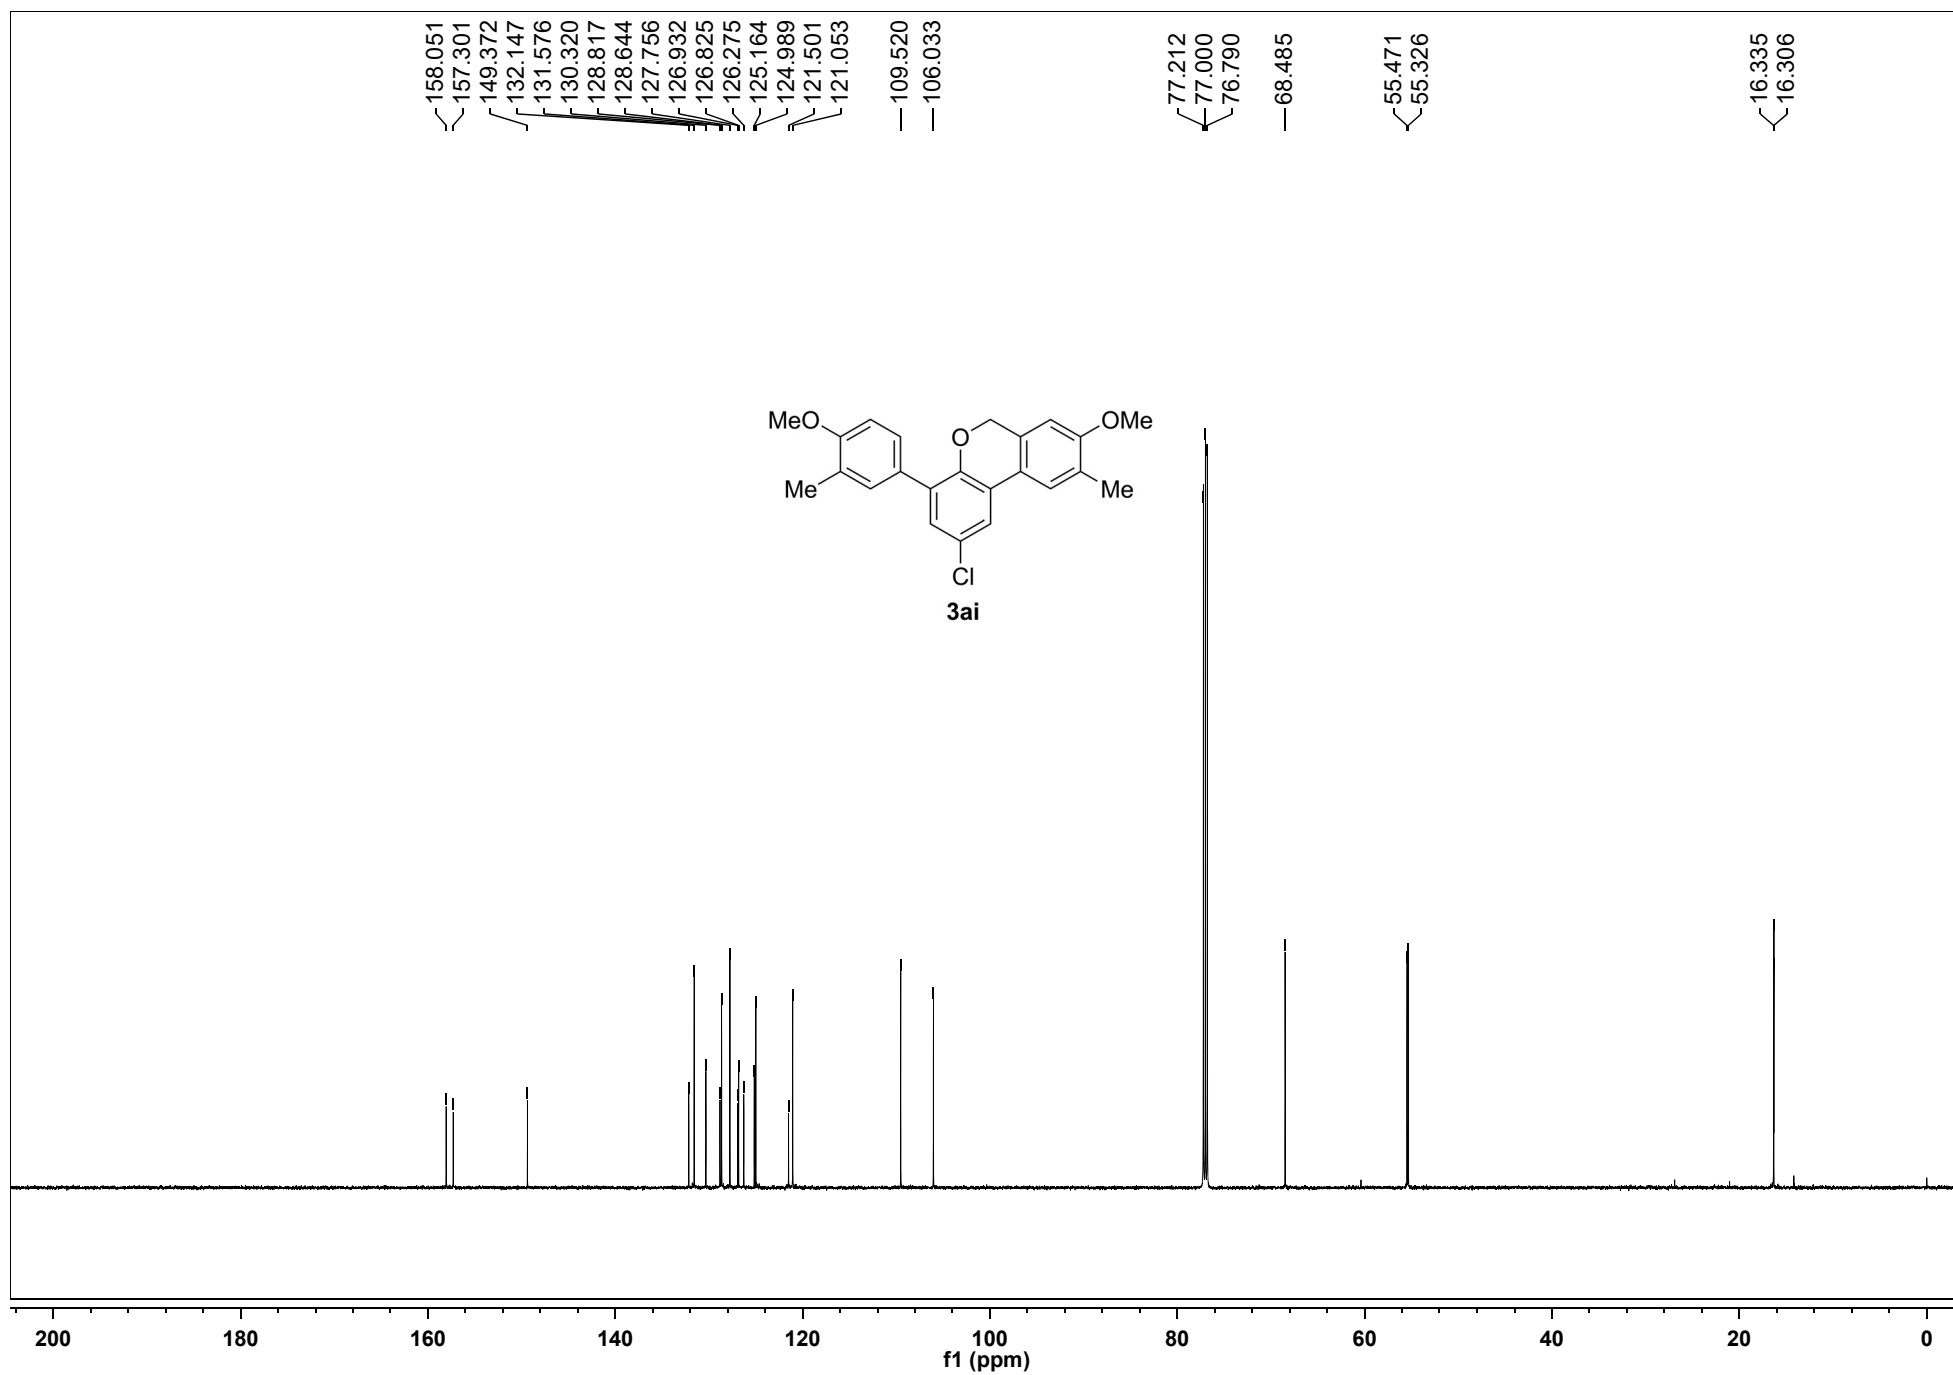

Figure S45. <sup>1</sup>H NMR spectrum (600 MHz, CDCl<sub>3</sub>) of 3aj

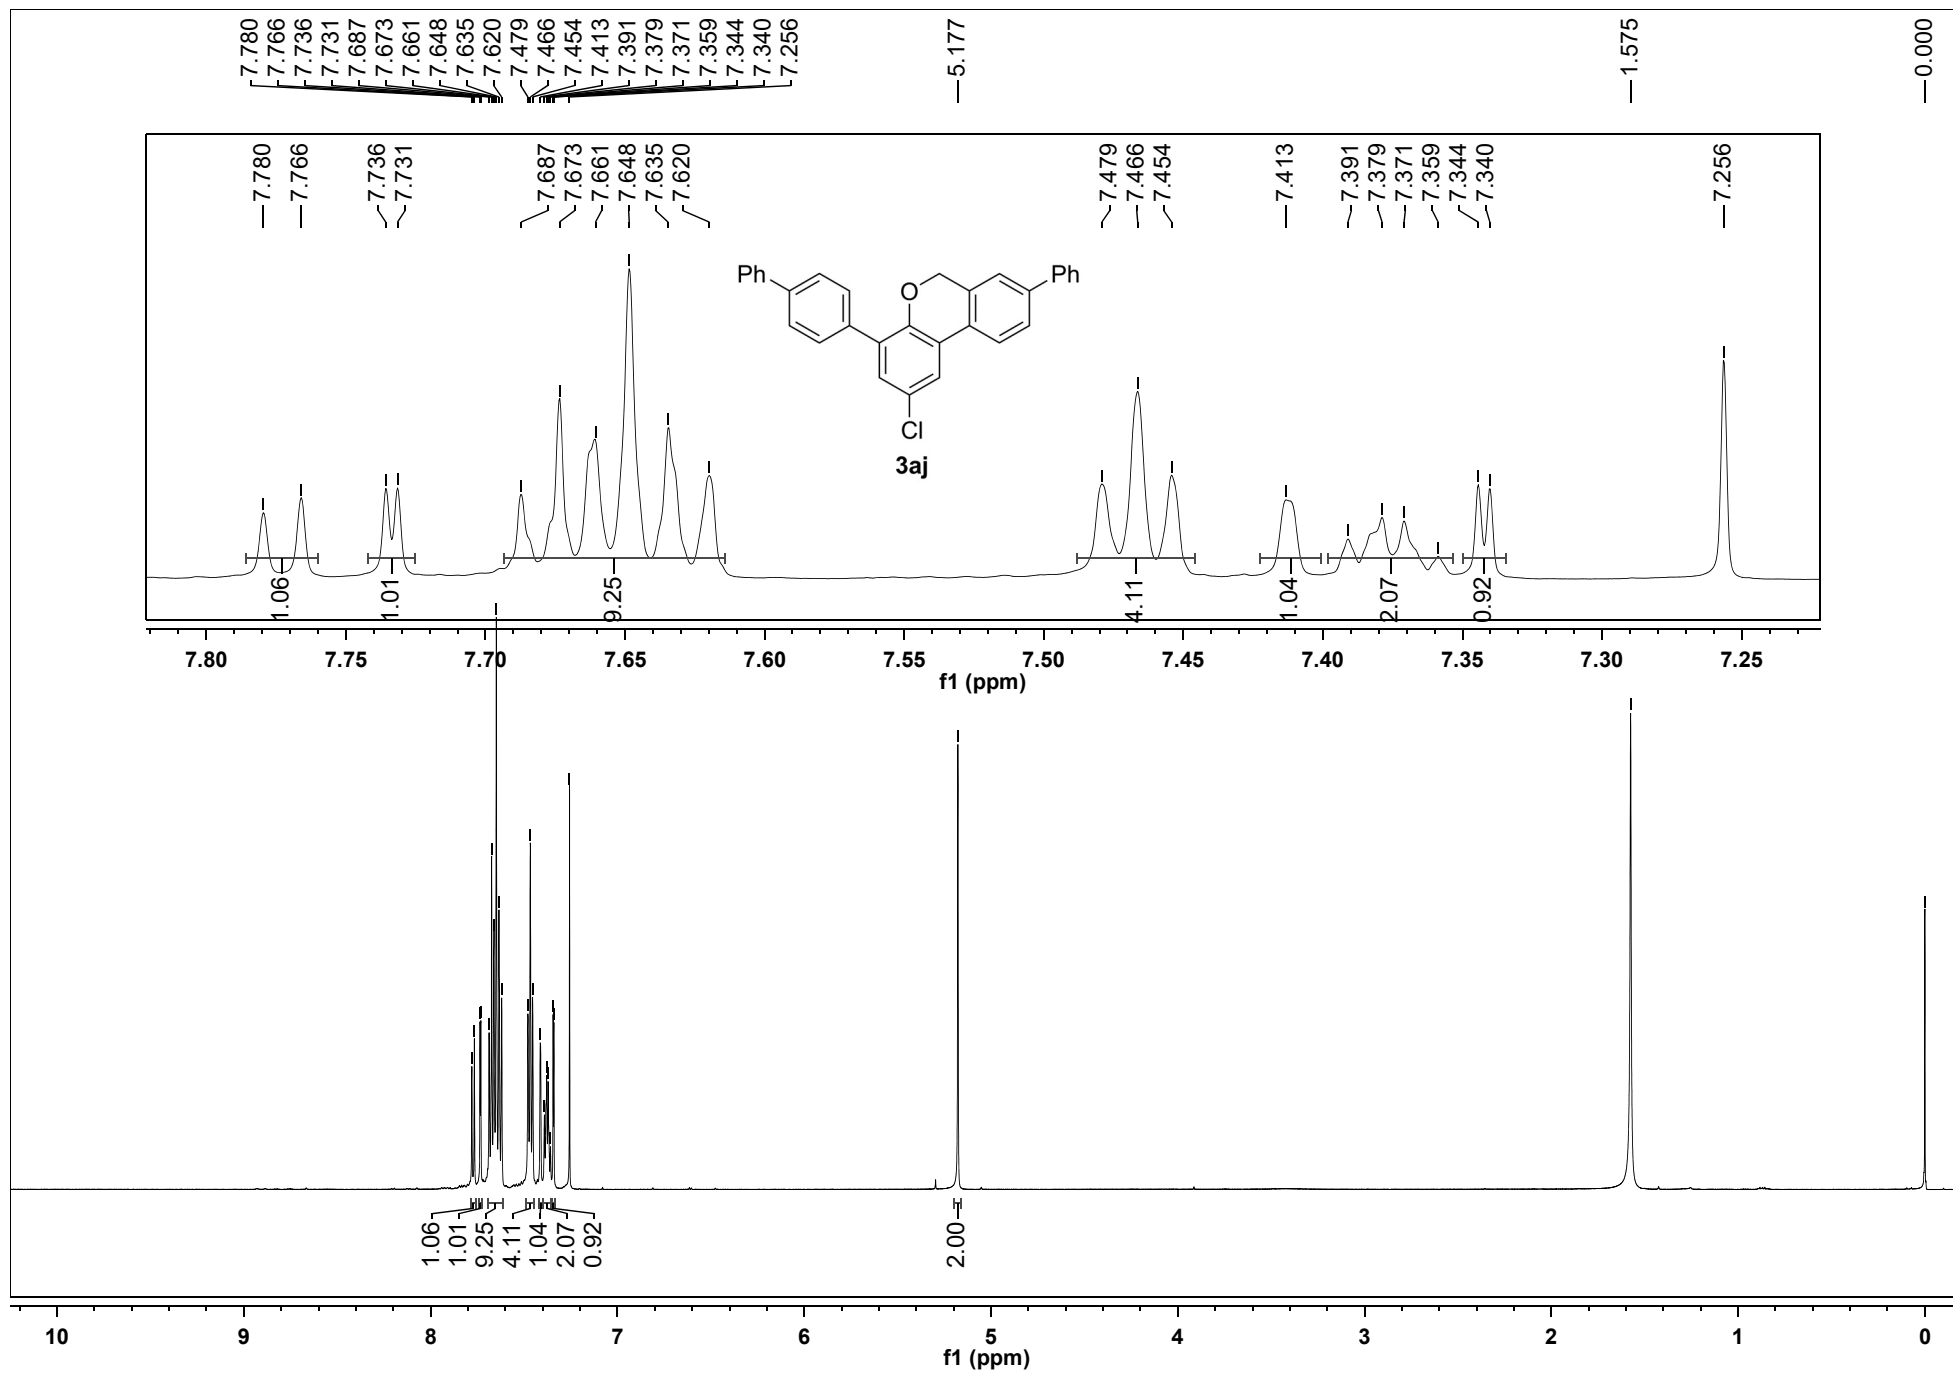

Figure S46.  $^{13}\text{C}\{^1\text{H}\}$  NMR spectrum (150 MHz,  $\text{CDCl}_3$ ) of 3aj

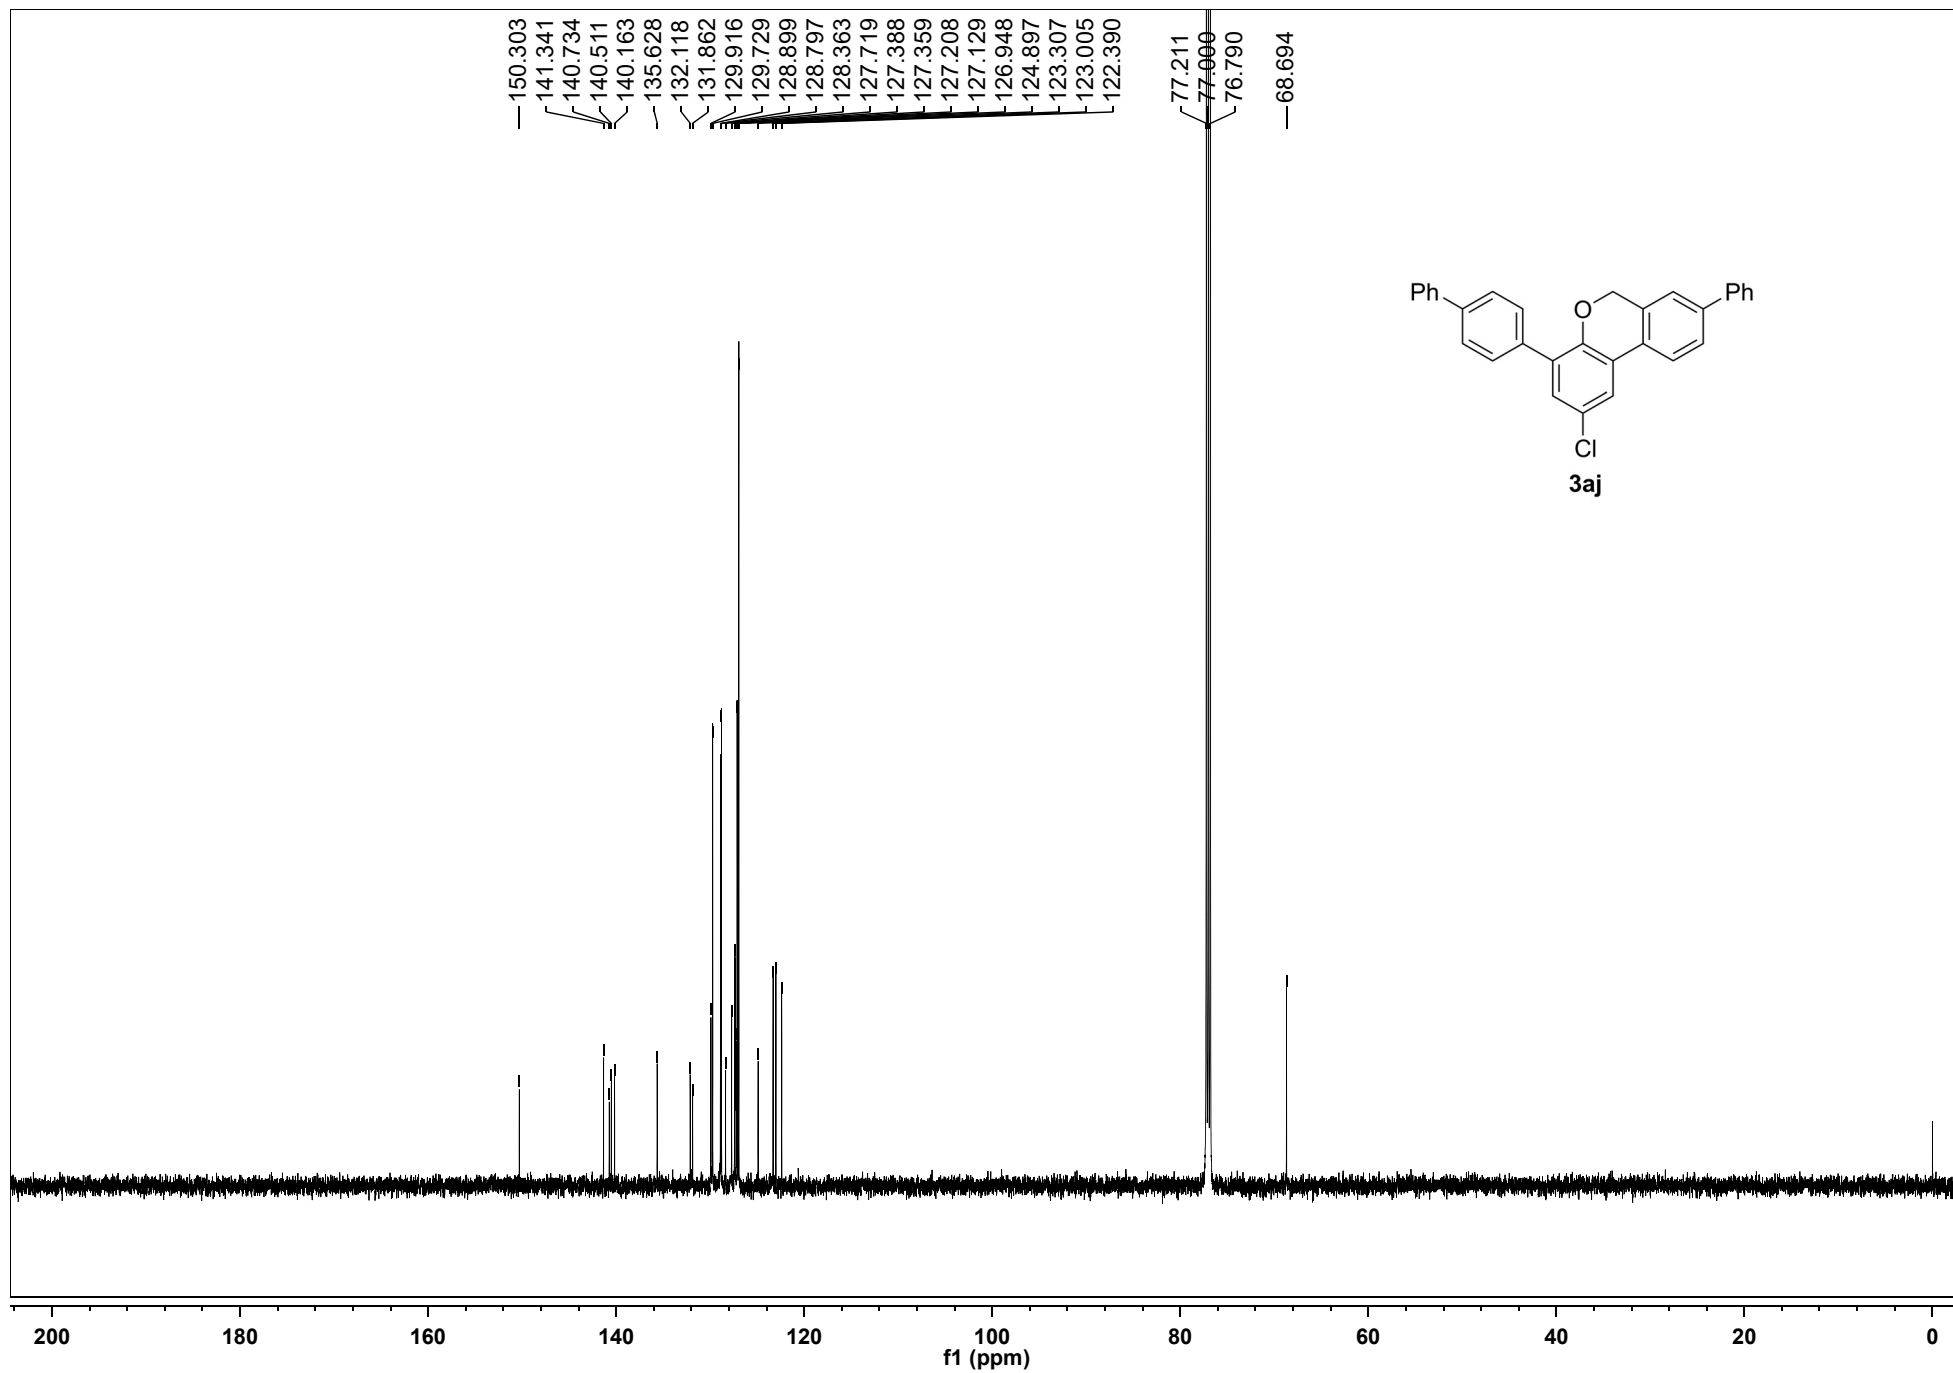

Figure S47. <sup>1</sup>H NMR spectrum (600 MHz, CDCl<sub>3</sub>) of 3ak

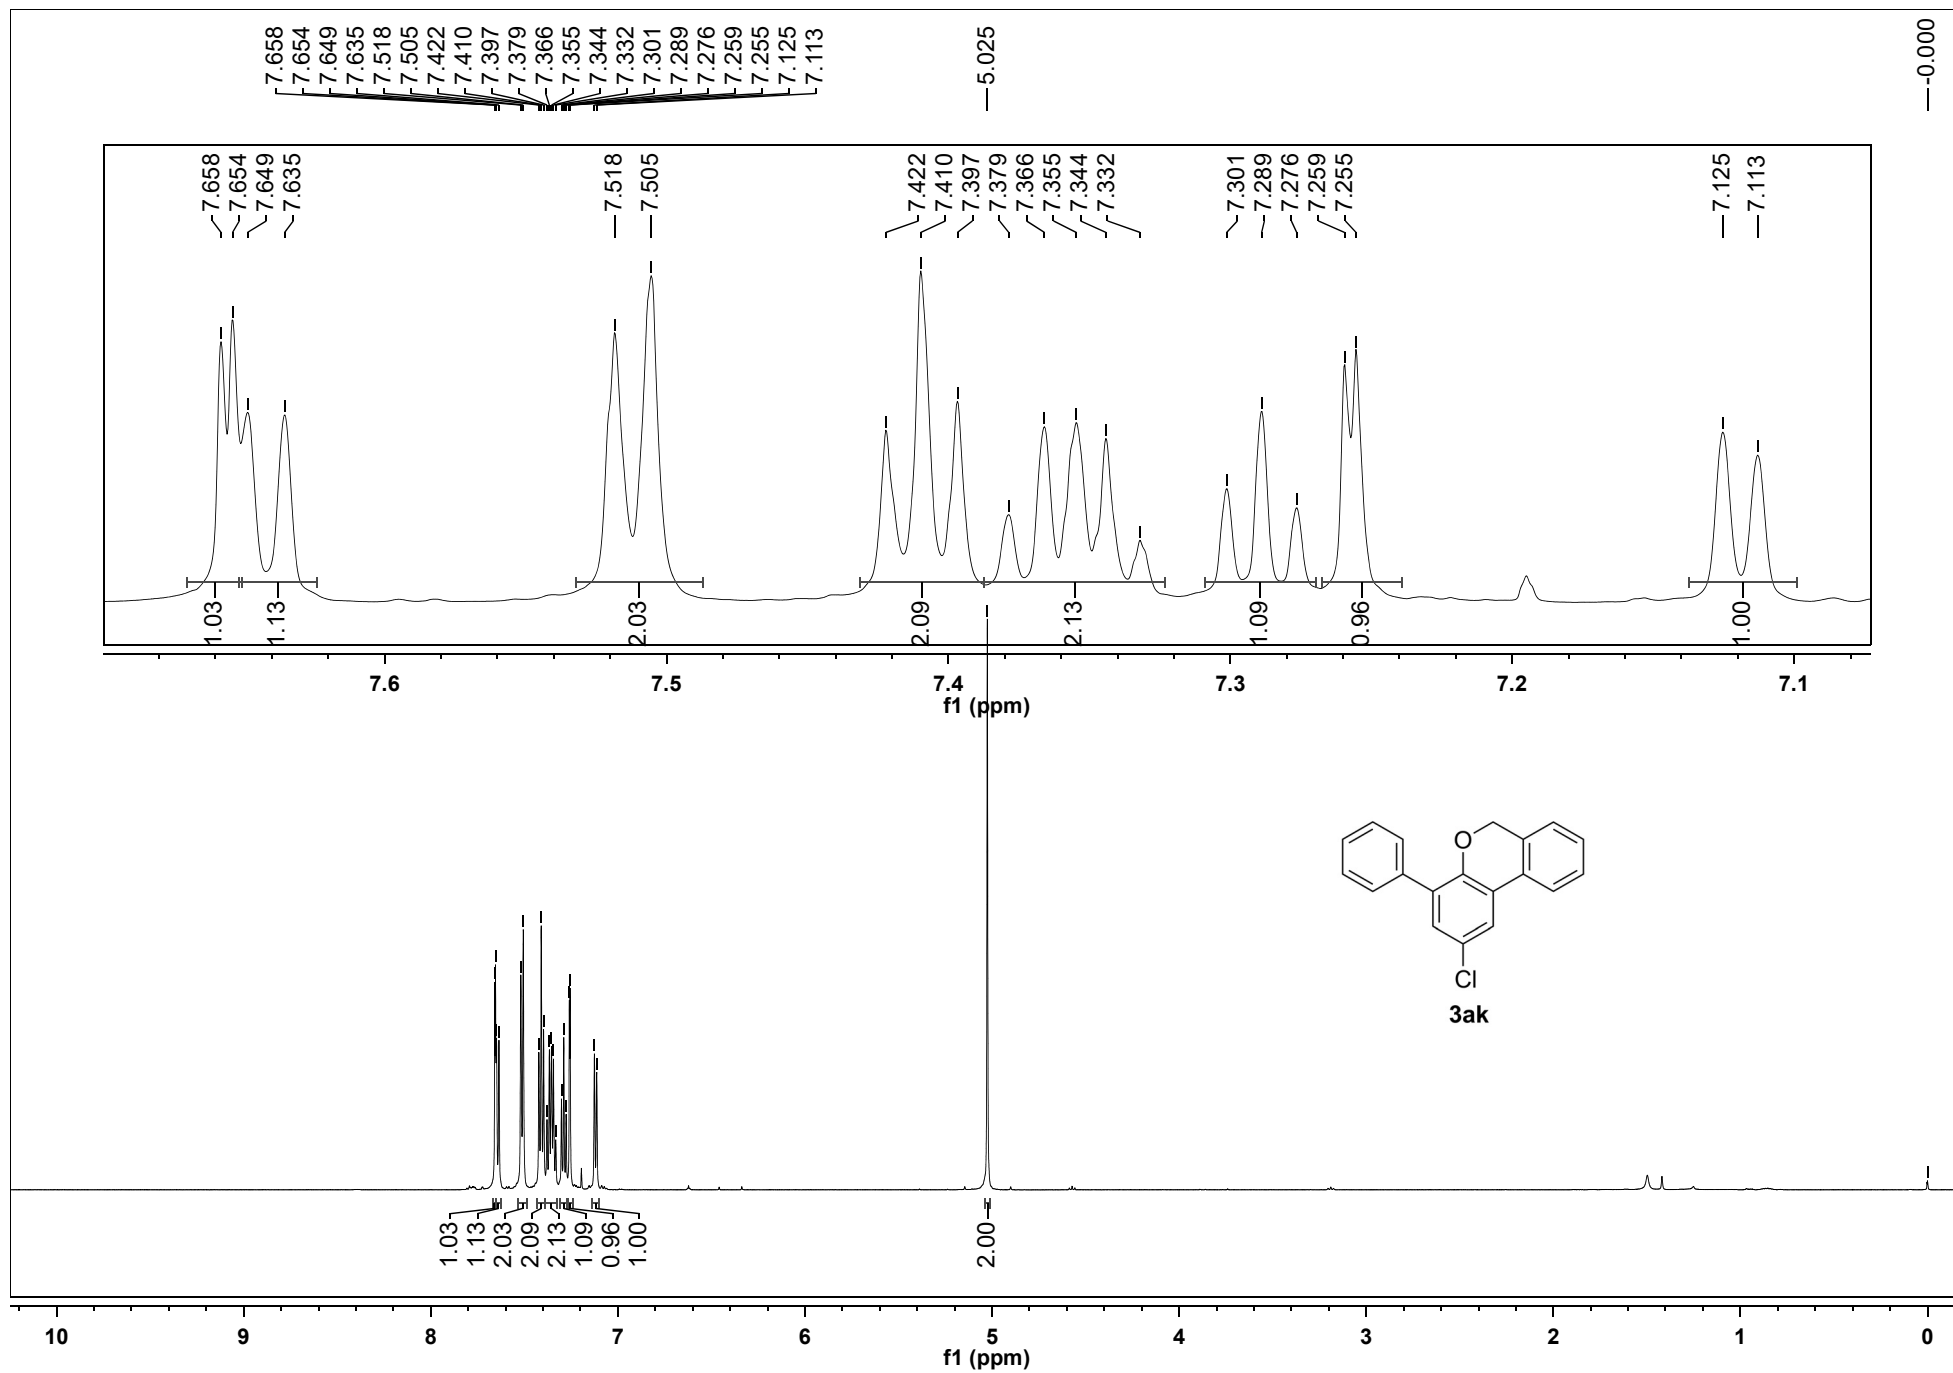

Figure S48.  $^{13}\text{C}\{^1\text{H}\}$  NMR spectrum (150 MHz,  $\text{CDCl}_3$ ) of 3ak

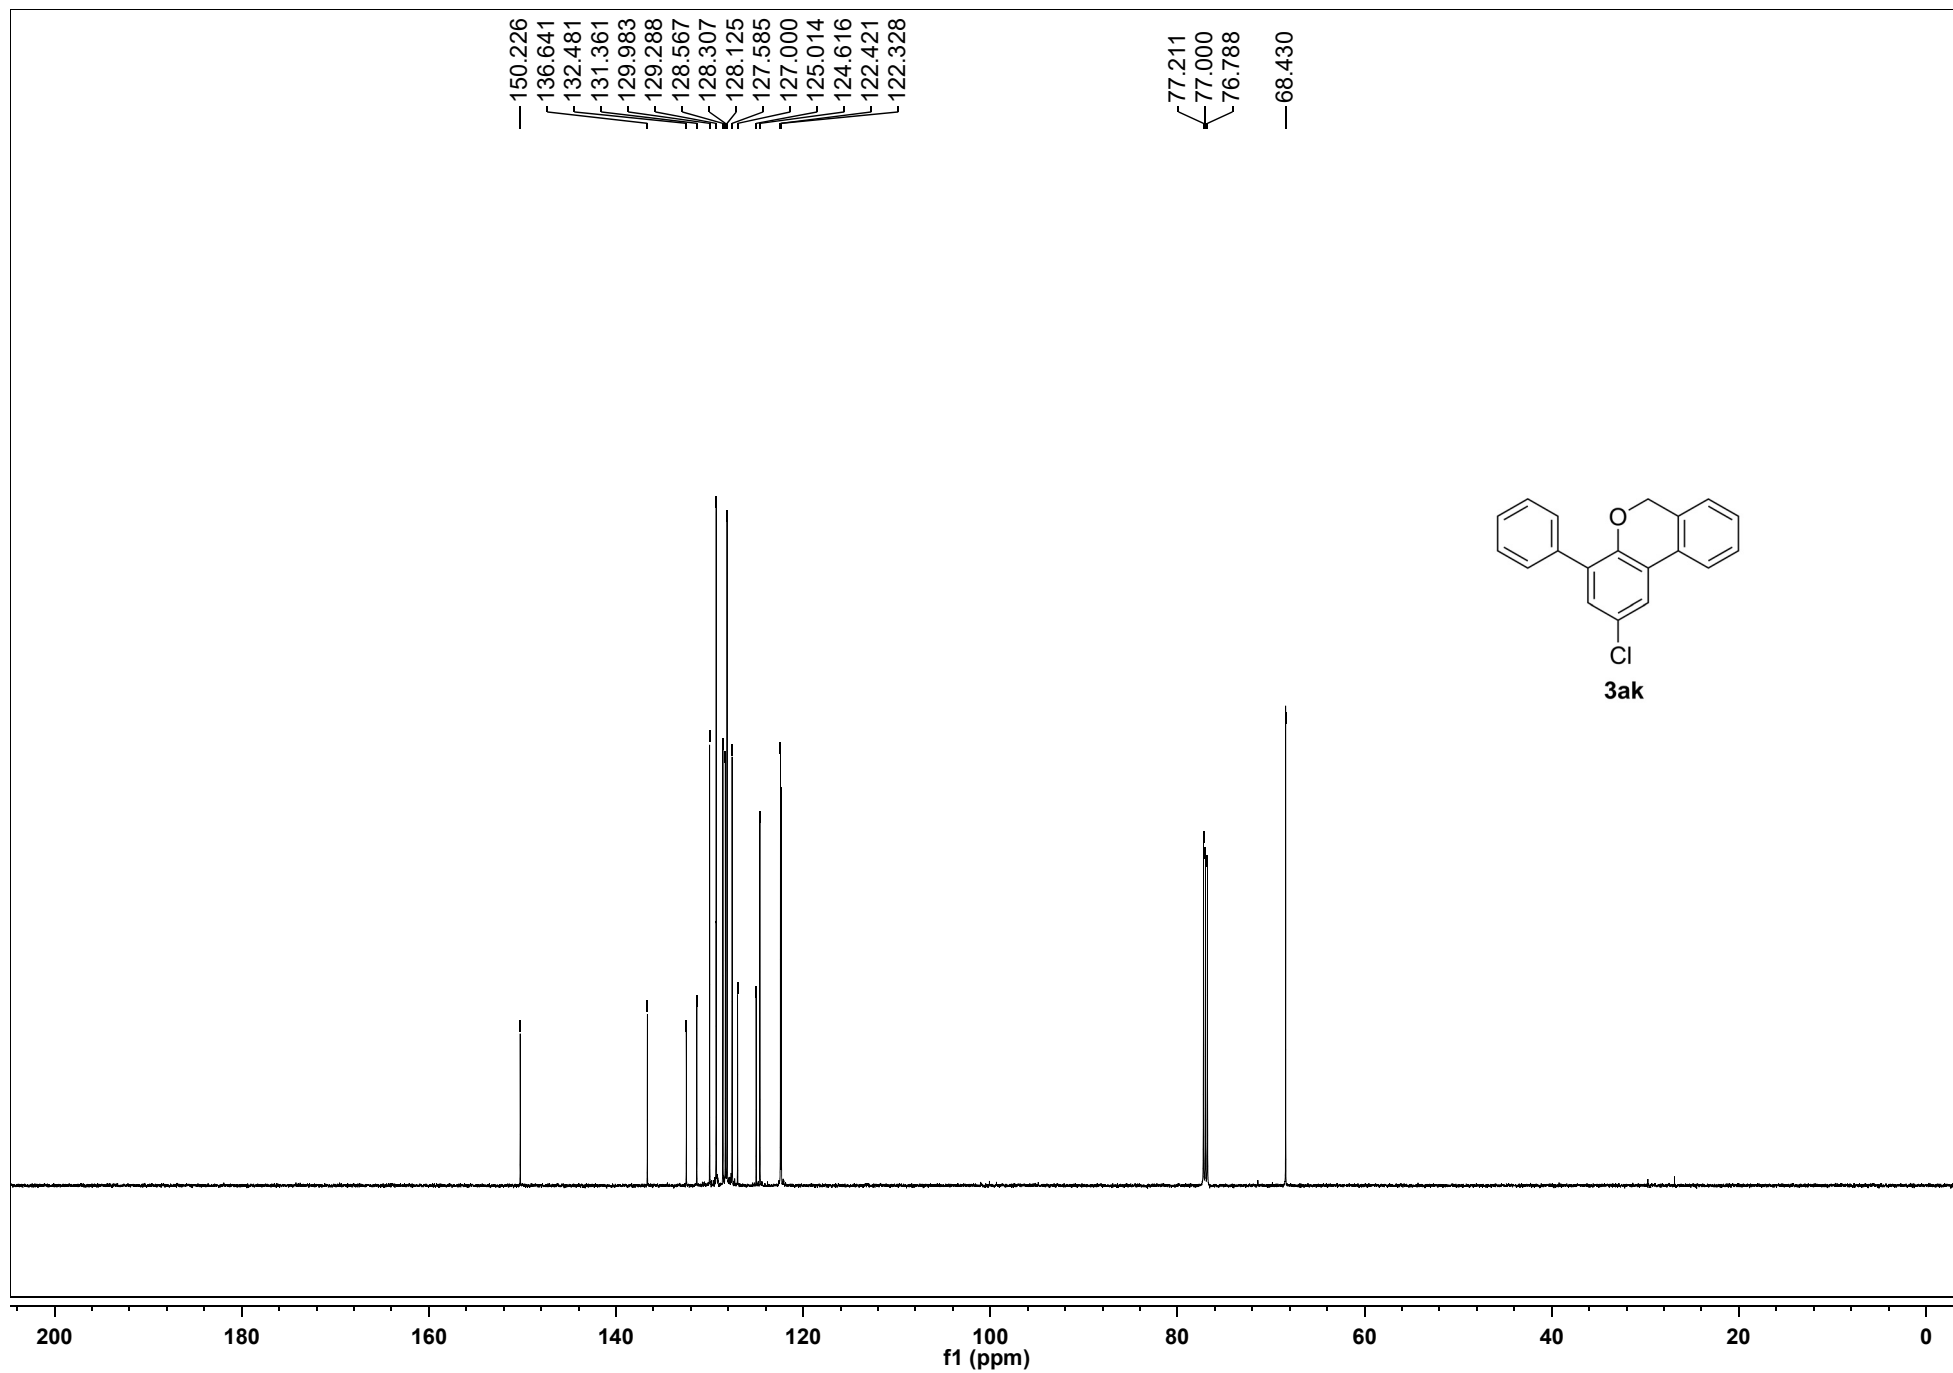



Figure S49. <sup>1</sup>H NMR spectrum (600 MHz, CDCl<sub>3</sub>) of 3aI

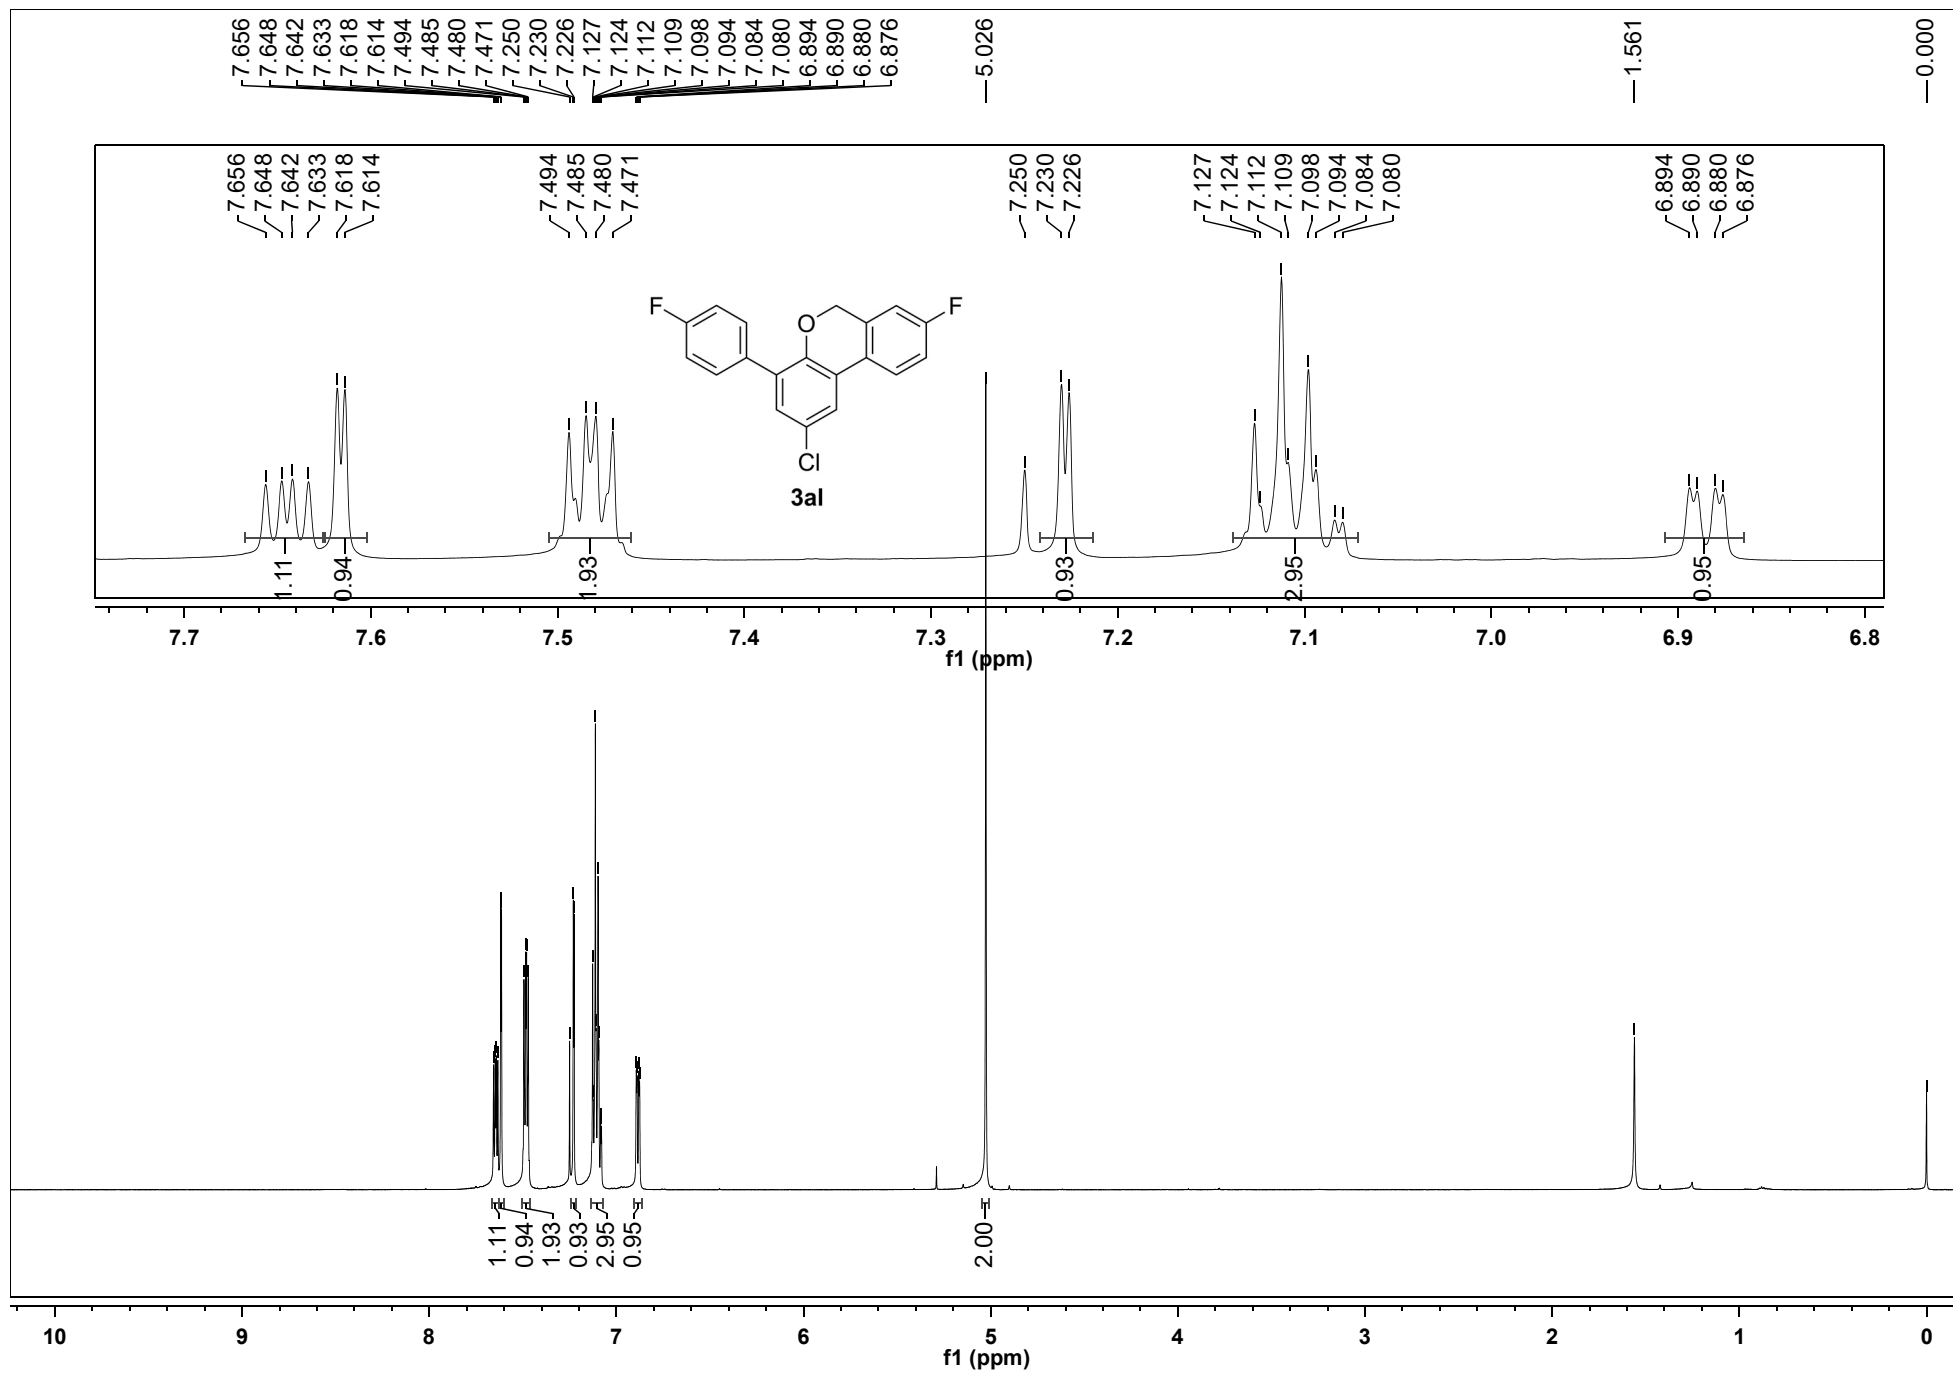

Figure S50.  $^{13}\text{C}\{^1\text{H}\}$  NMR spectrum (150 MHz,  $\text{CDCl}_3$ ) of 3aI

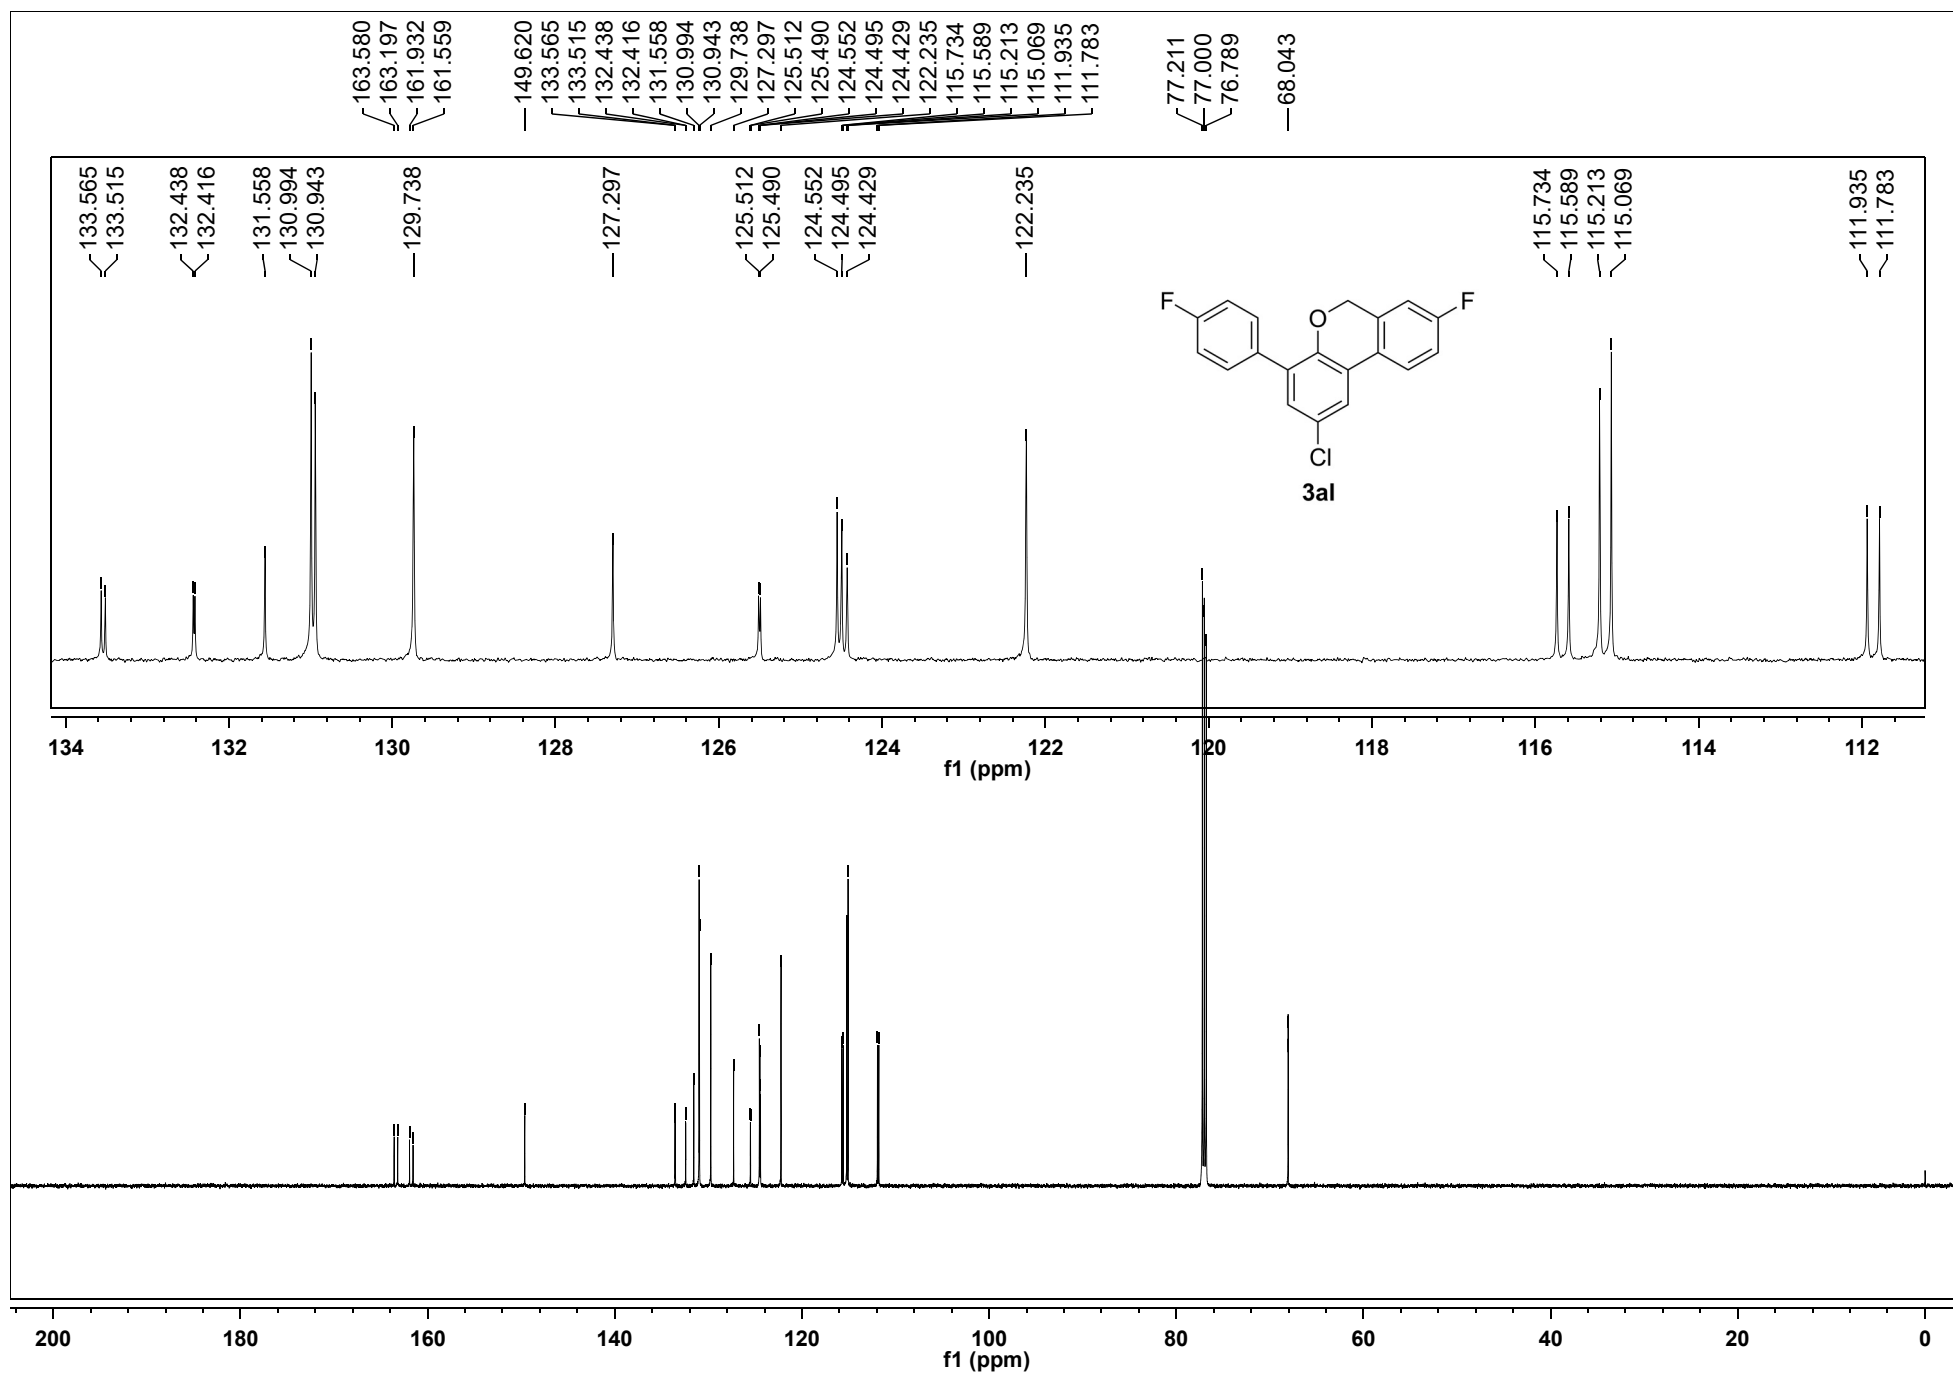

Figure S51. <sup>1</sup>H NMR spectrum (600 MHz, CDCl<sub>3</sub>) of 3am

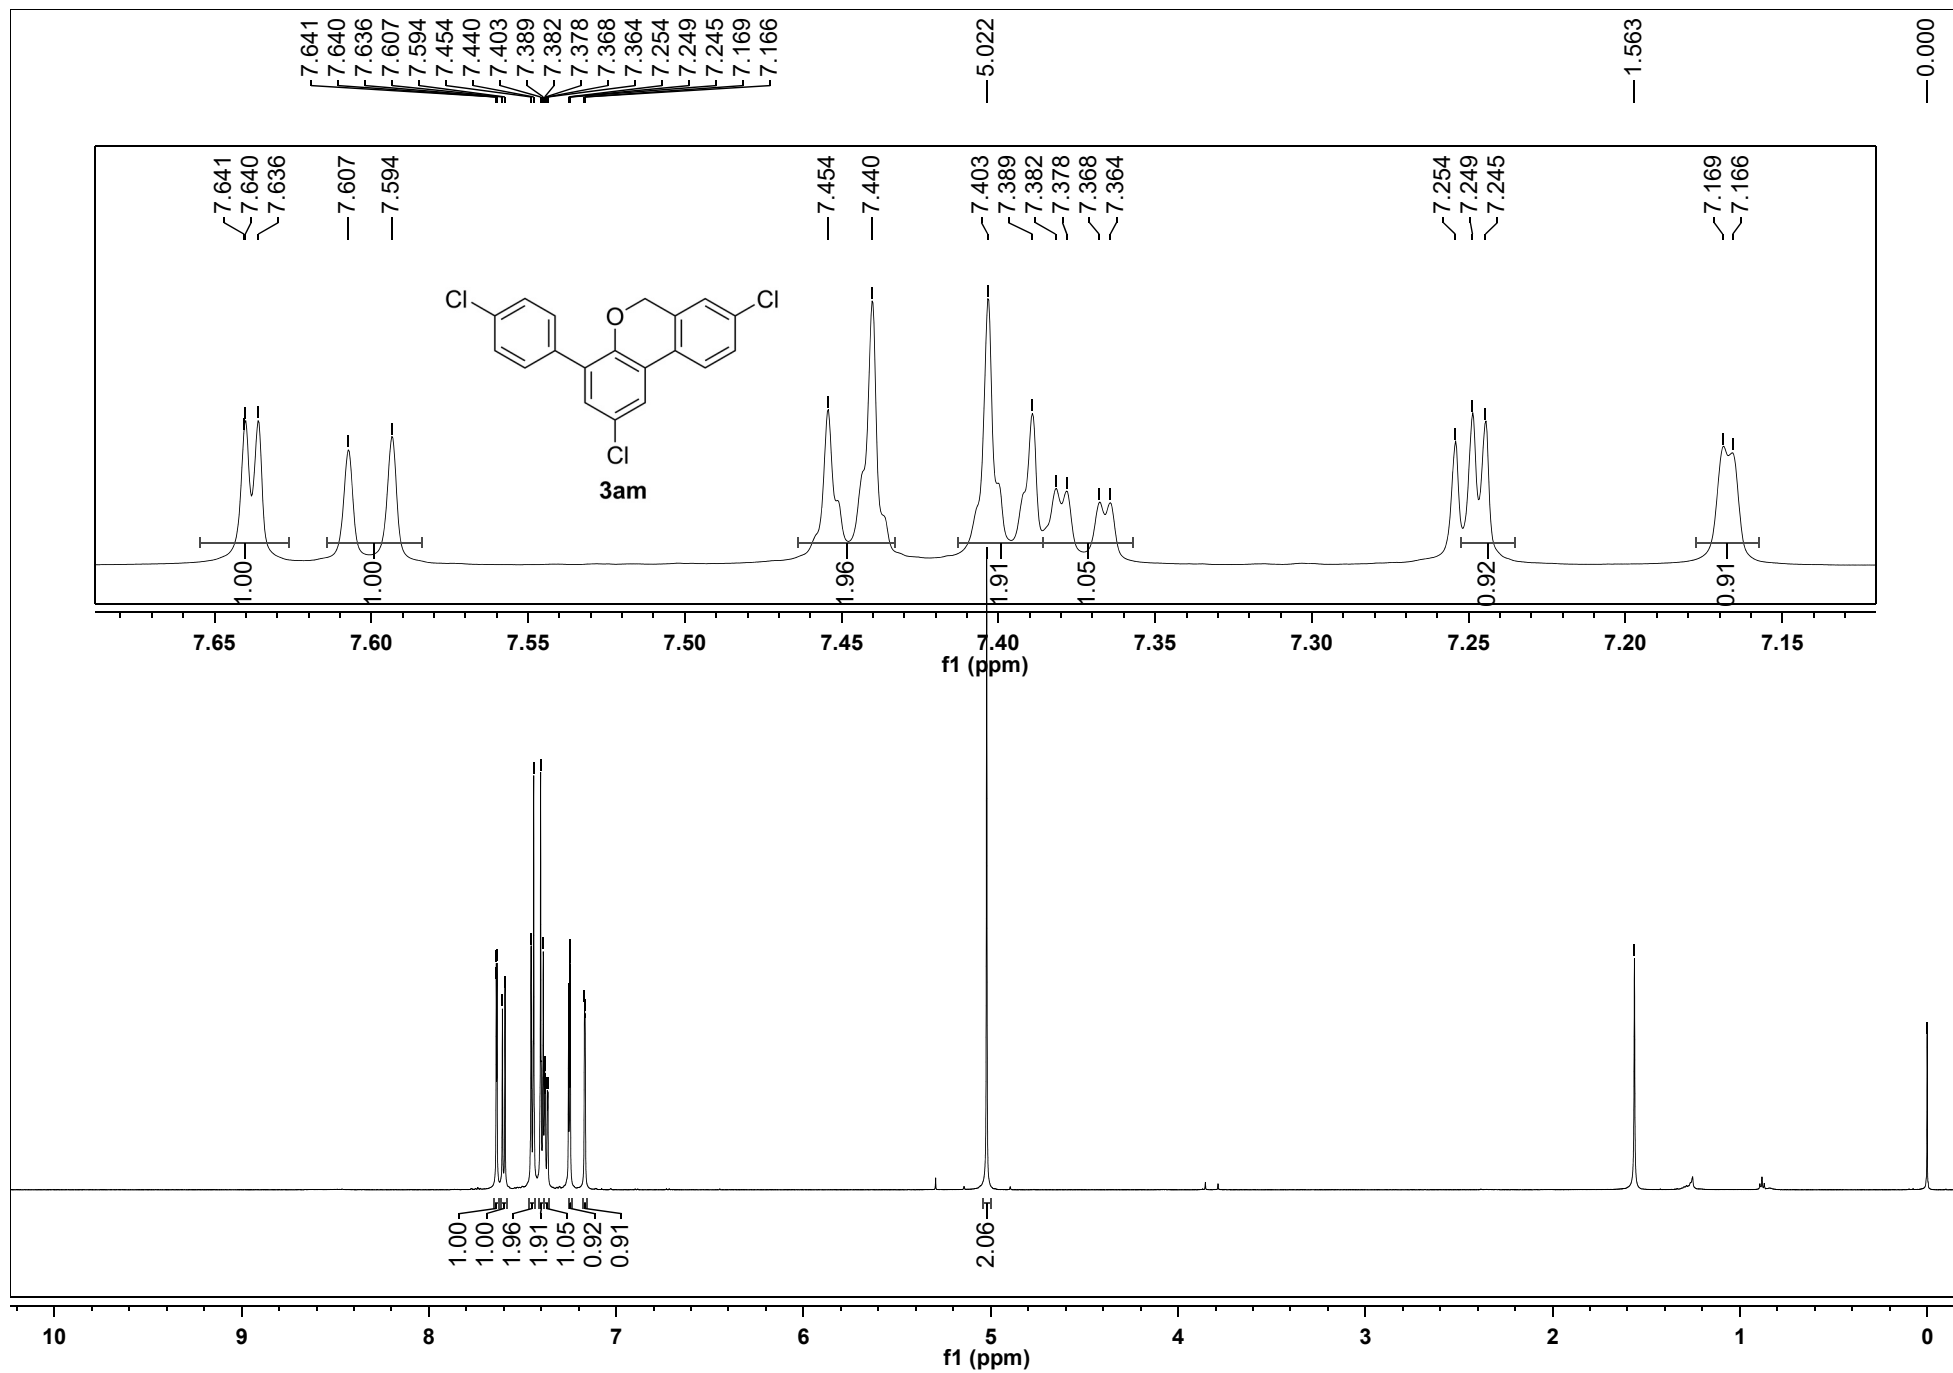

Figure S52.  $^{13}\text{C}\{^1\text{H}\}$  NMR spectrum (150 MHz,  $\text{CDCl}_3$ ) of 3am

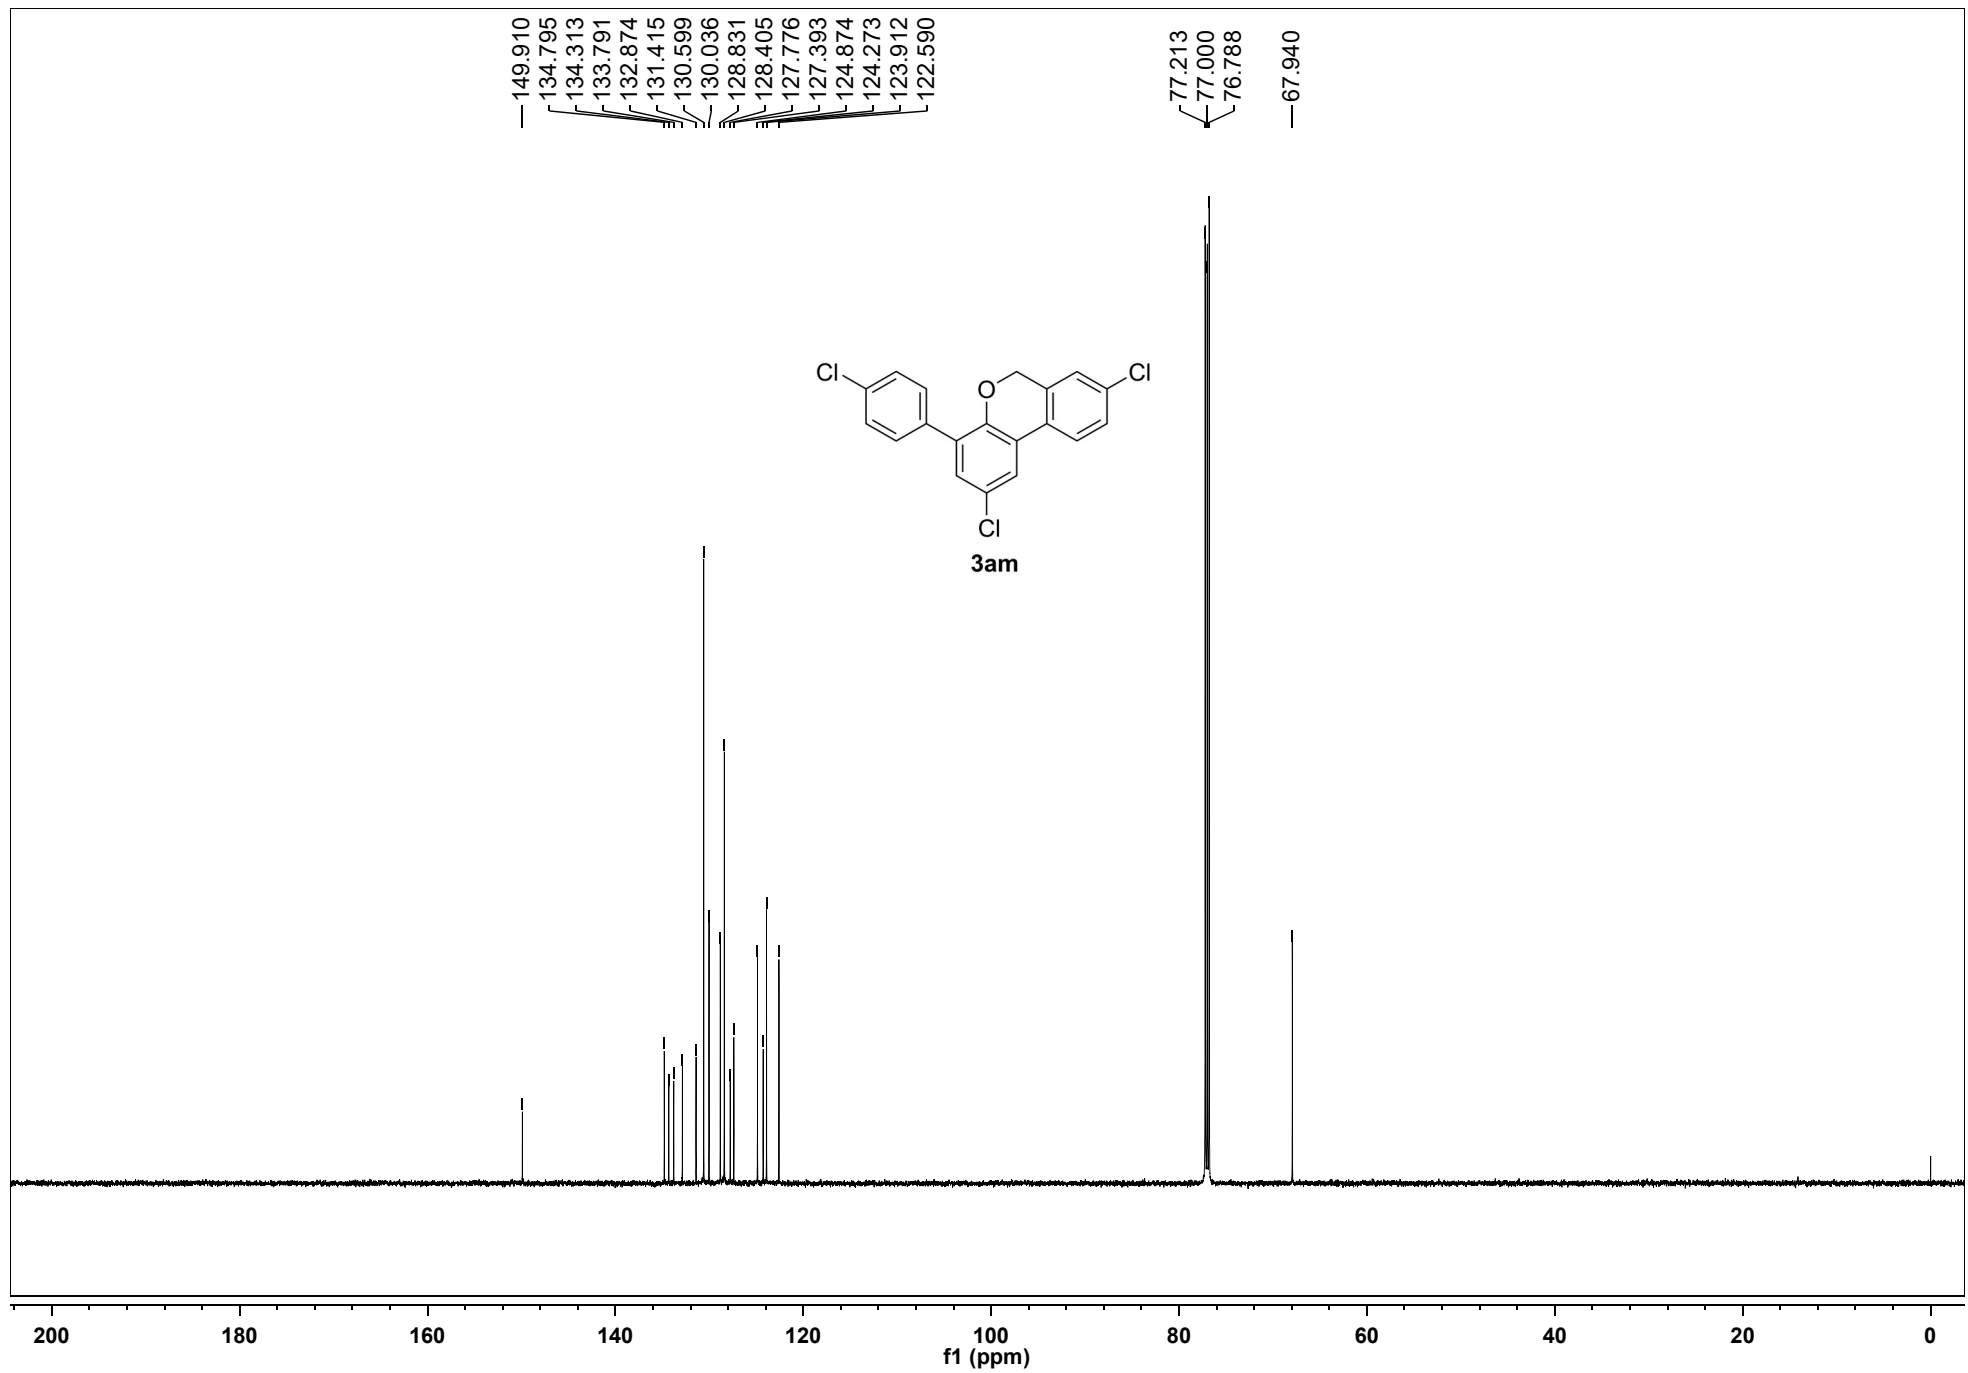

Figure S53. <sup>1</sup>H NMR spectrum (600 MHz, CDCl<sub>3</sub>) of 3kk

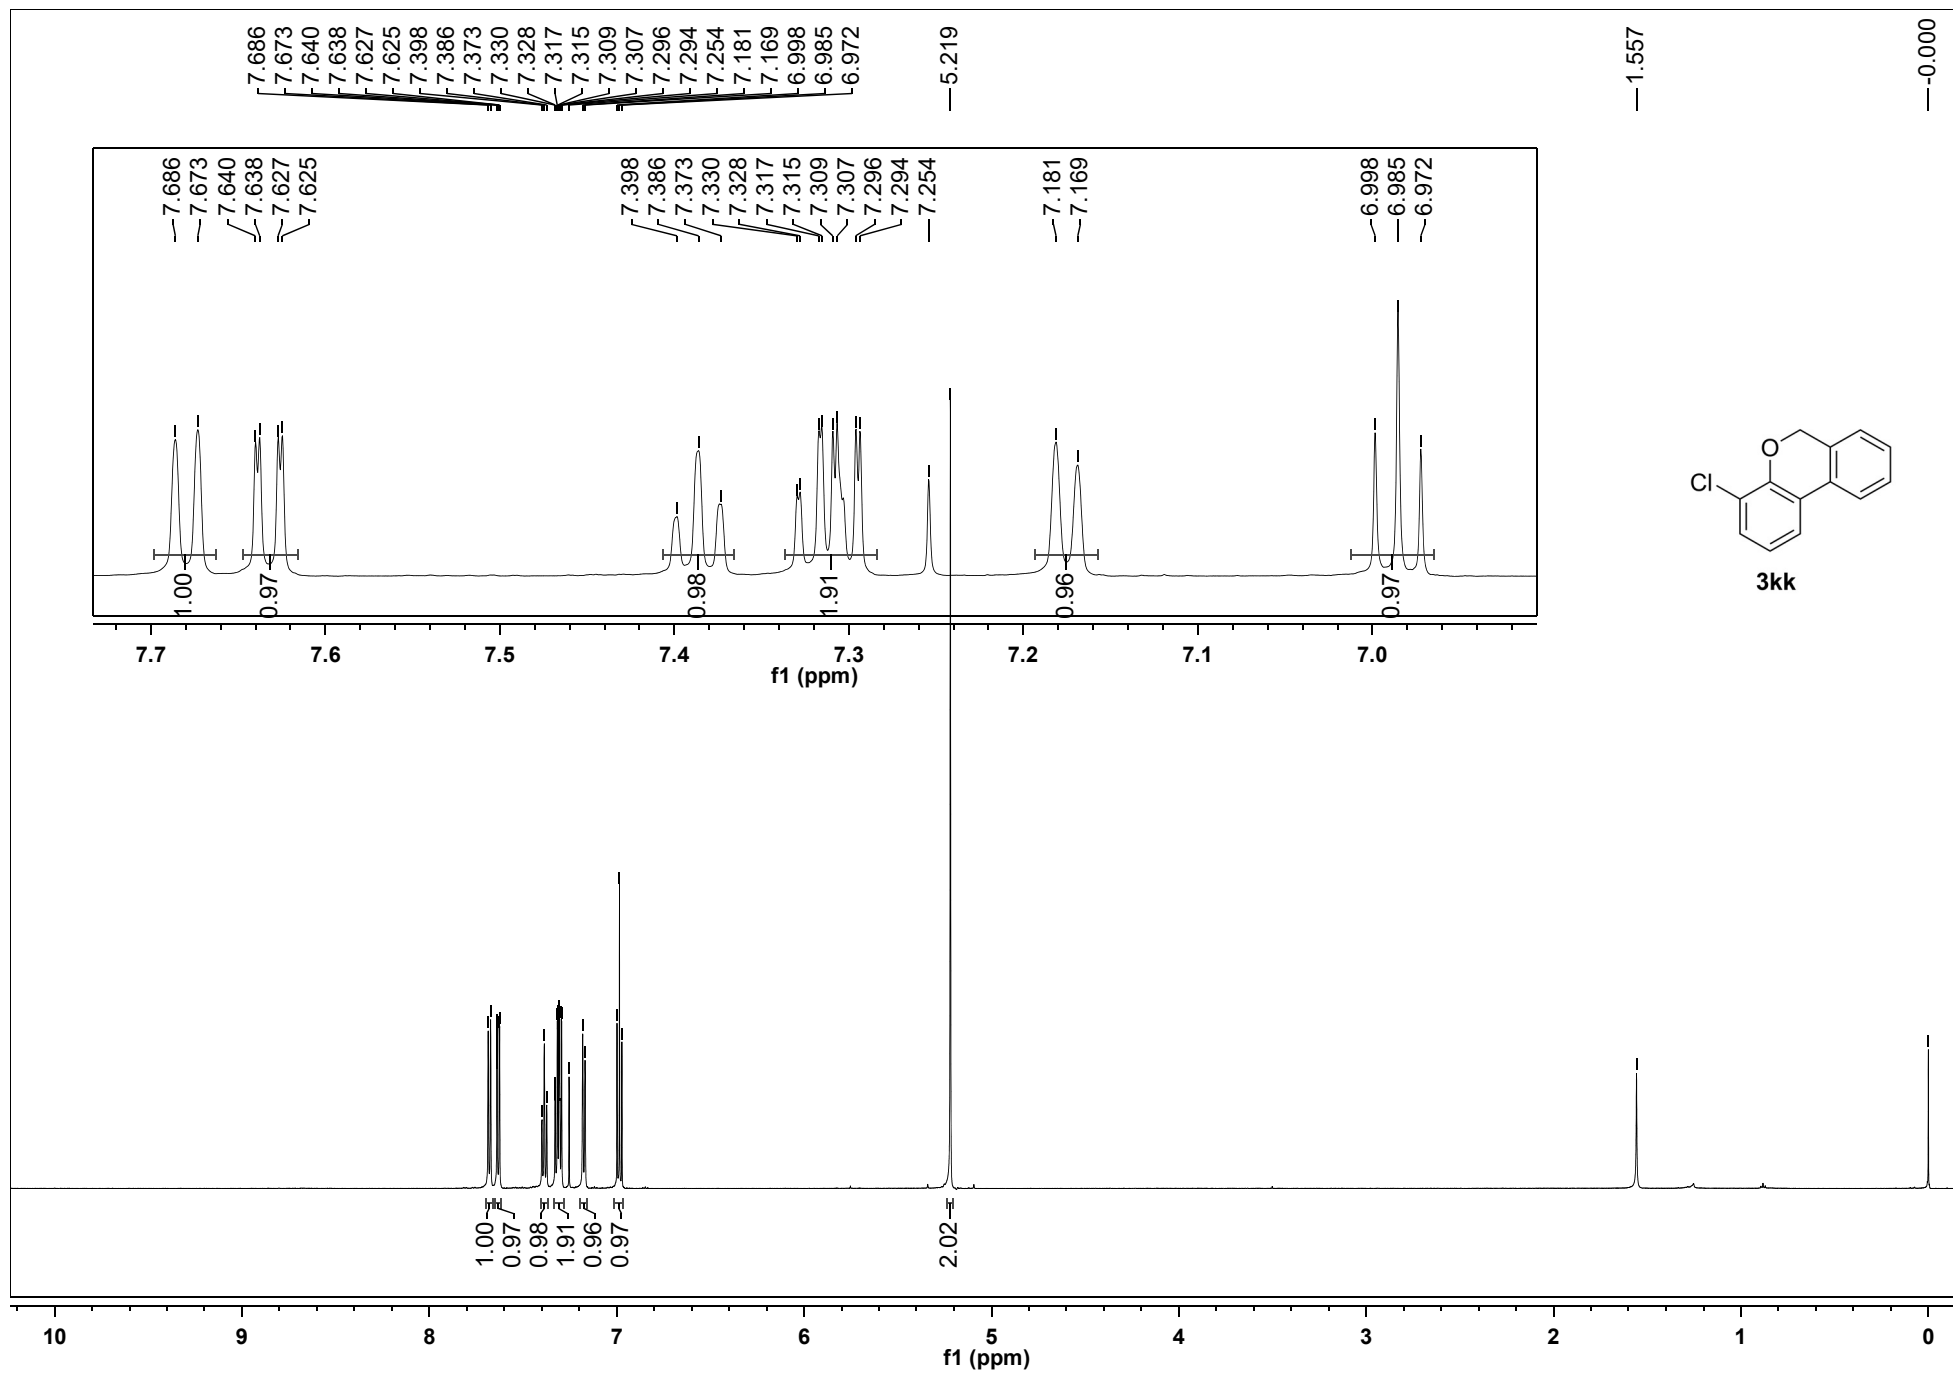

Figure S54.  $^{13}\text{C}\{^1\text{H}\}$  NMR spectrum (150 MHz,  $\text{CDCl}_3$ ) of 3kk

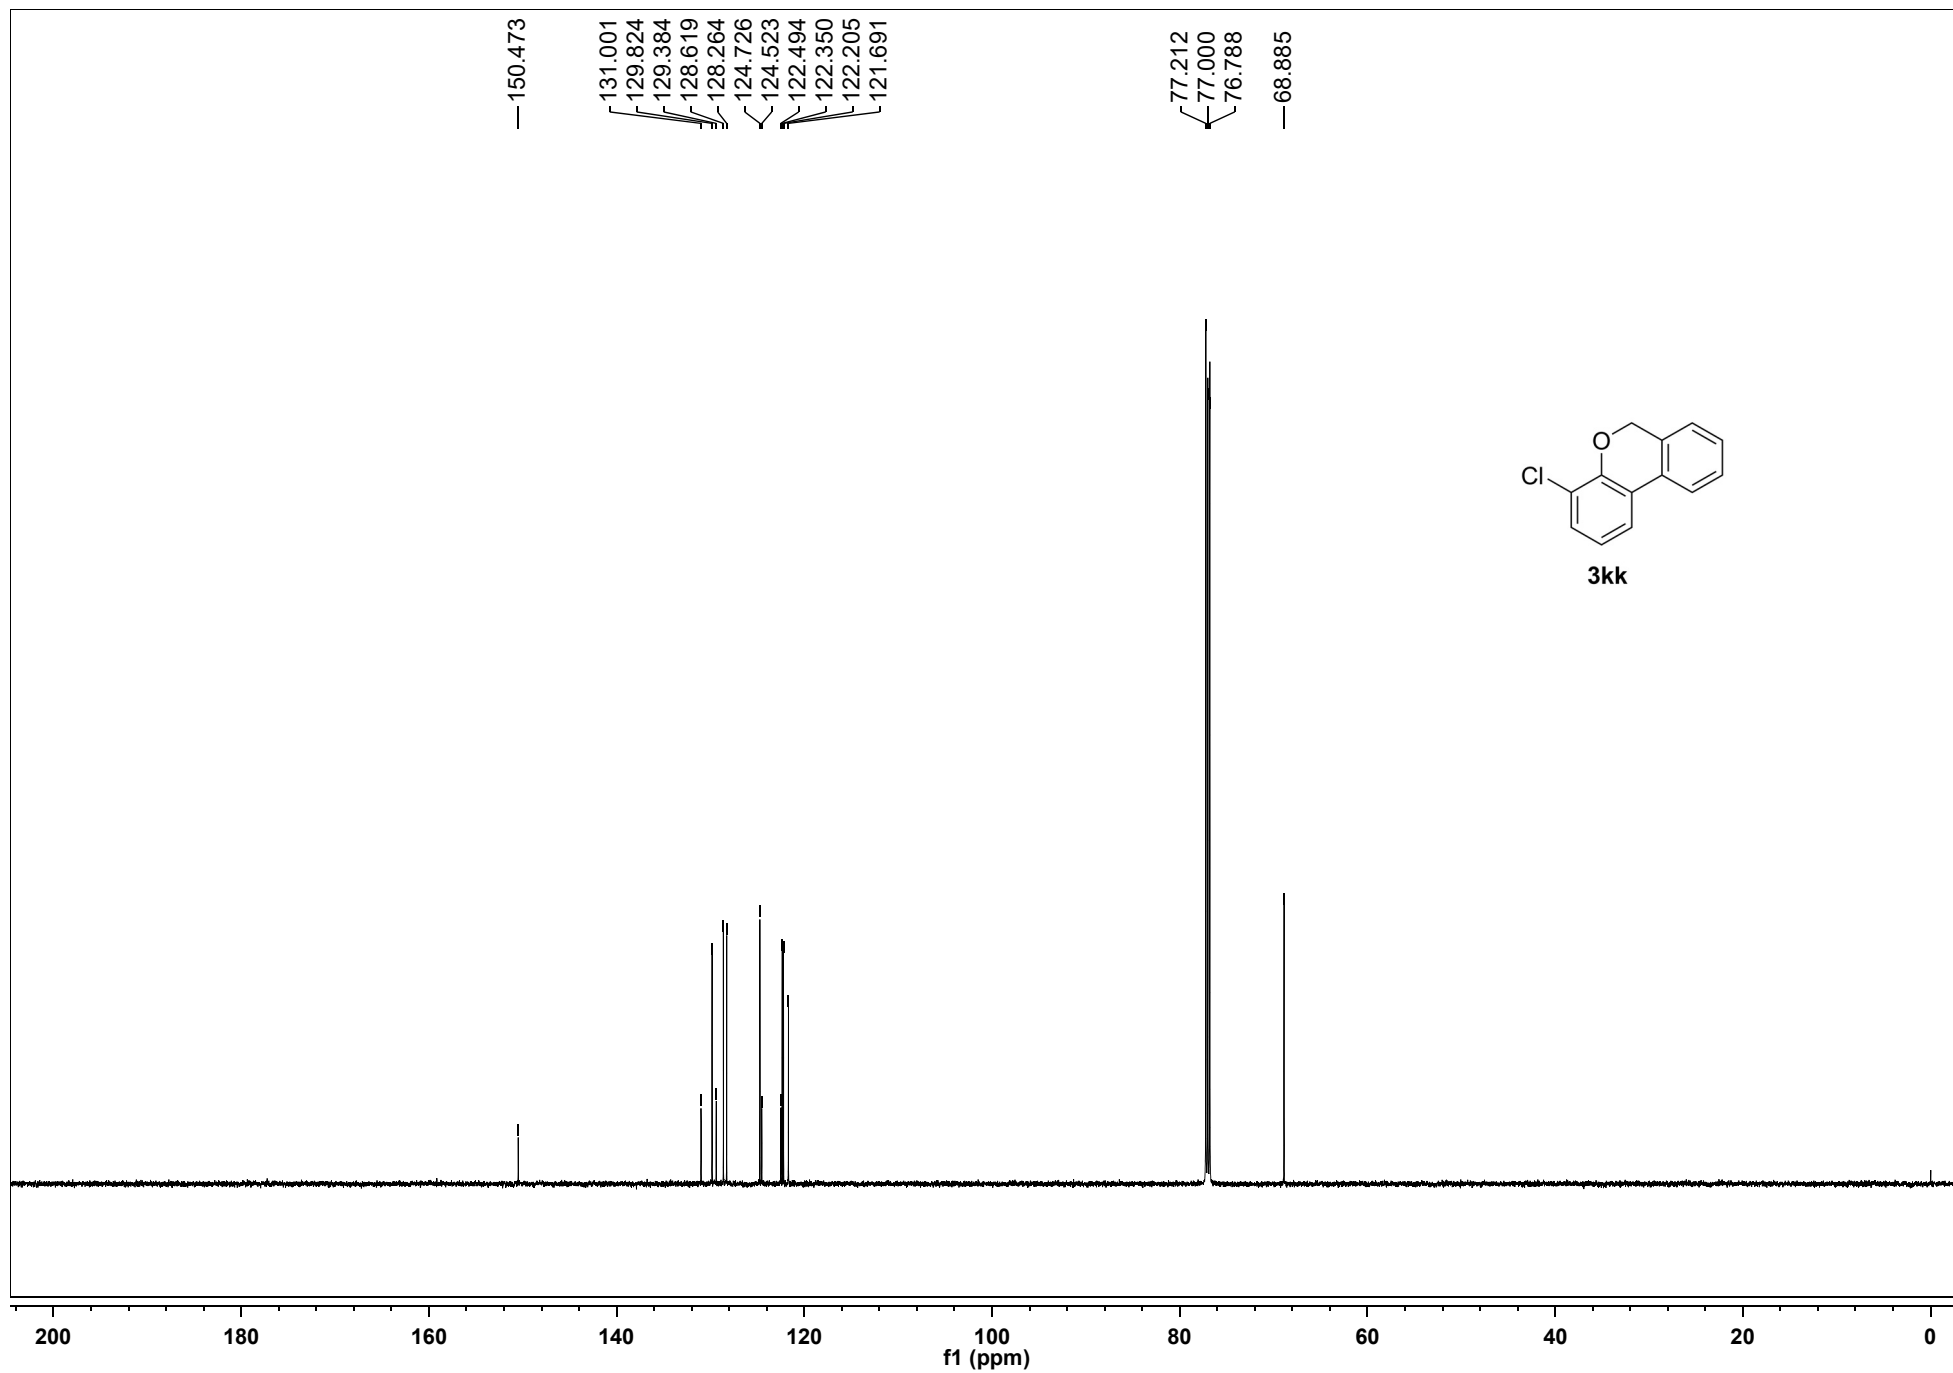

Figure S55. <sup>1</sup>H NMR spectrum (600 MHz, CDCl<sub>3</sub>) of 3kk-D

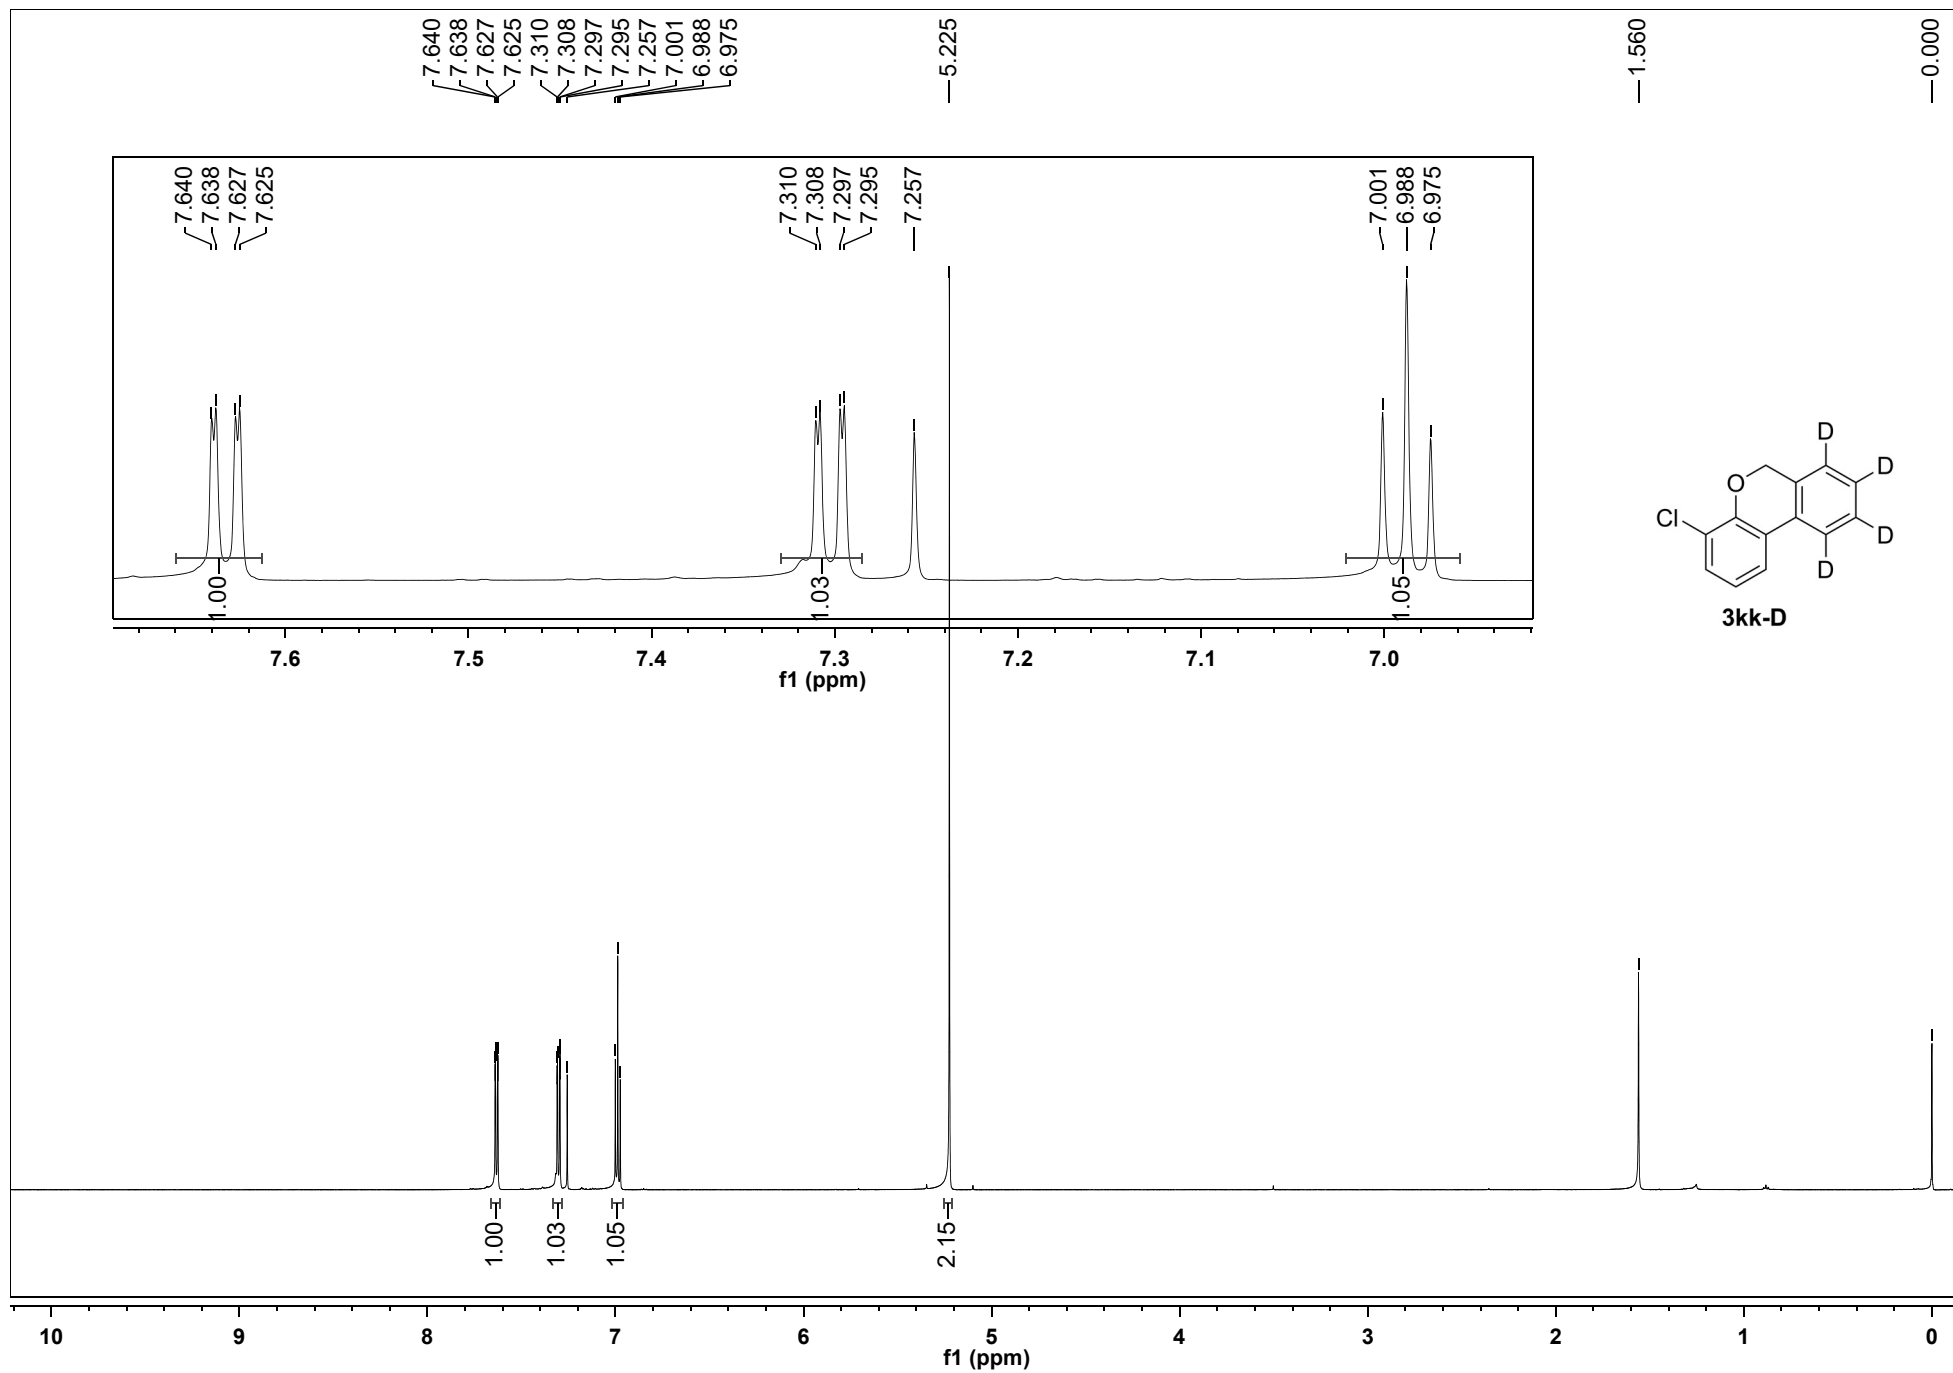

Figure S56.  $^{13}\text{C}\{^1\text{H}\}$  NMR spectrum (150 MHz,  $\text{CDCl}_3$ ) of 3kk-D

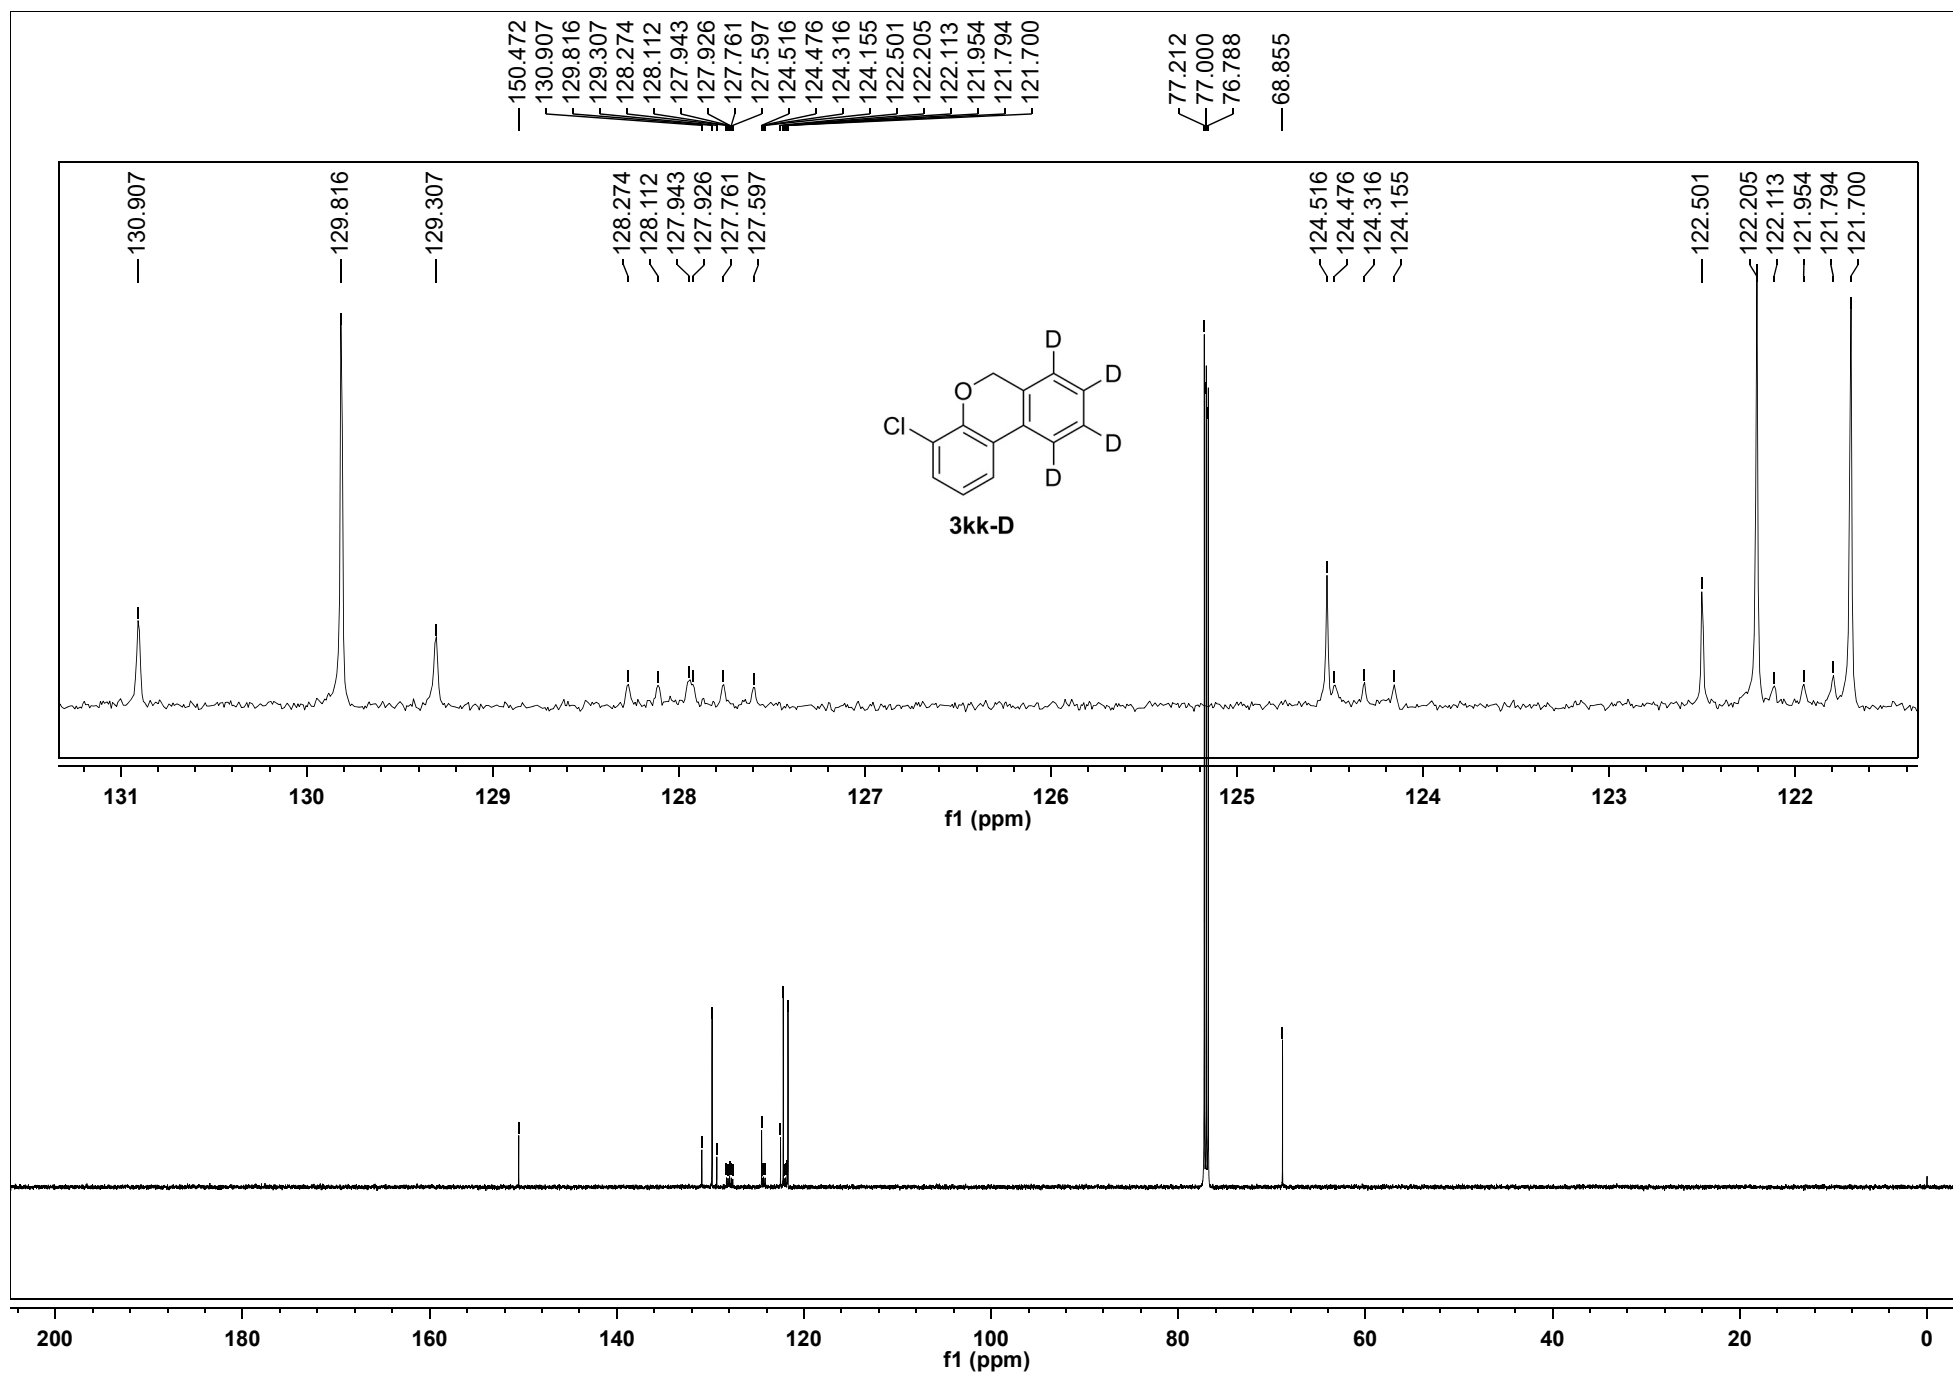



Figure S57. <sup>1</sup>H NMR spectrum (600 MHz, CDCl<sub>3</sub>) of 5a

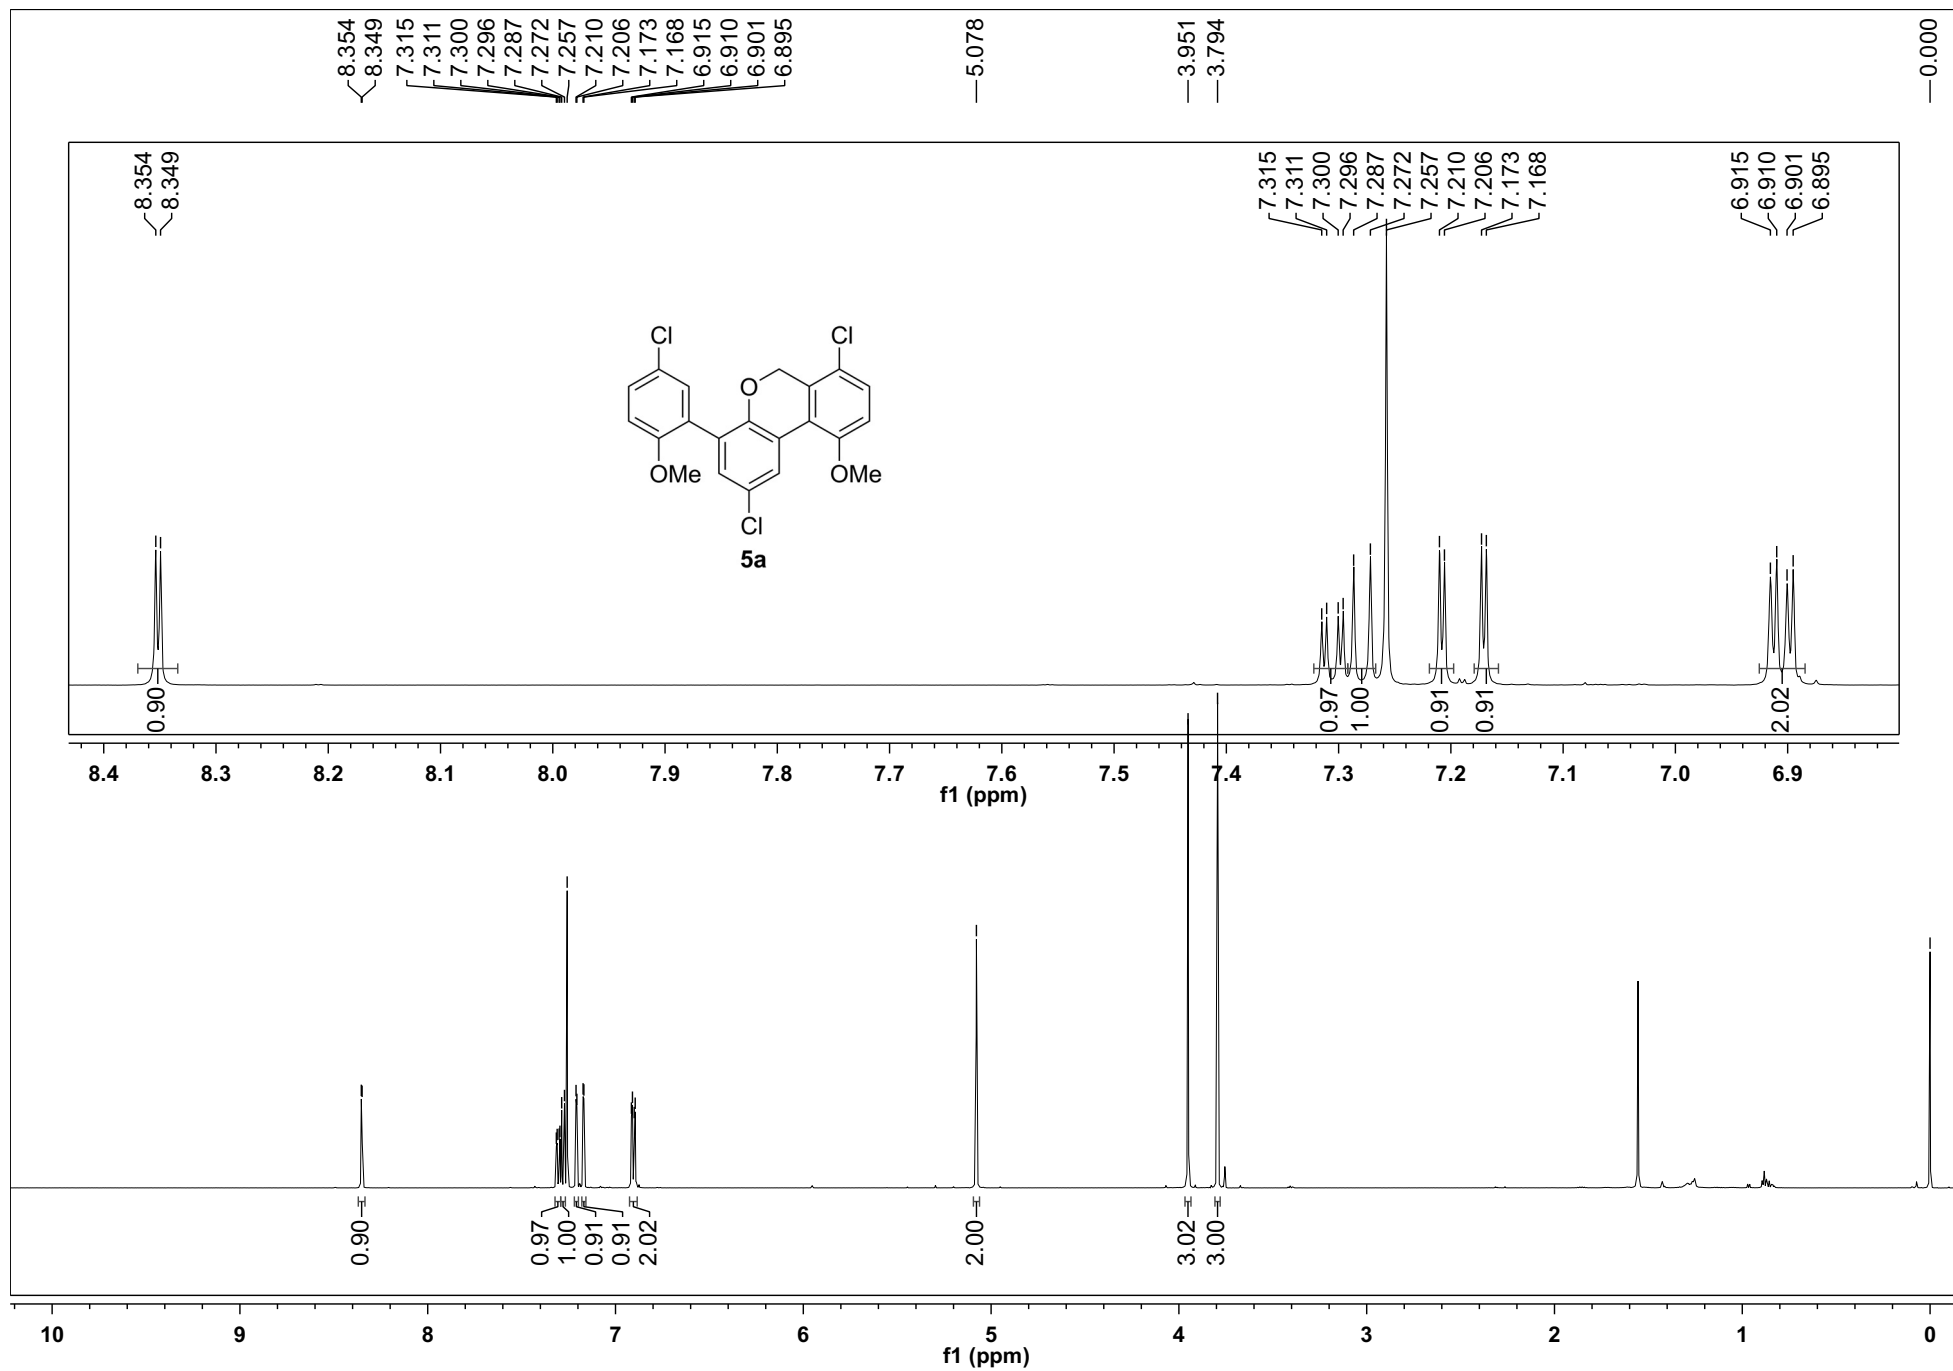

Figure S58.  $^{13}\text{C}\{^1\text{H}\}$  NMR spectrum (150 MHz,  $\text{CDCl}_3$ ) of 5a

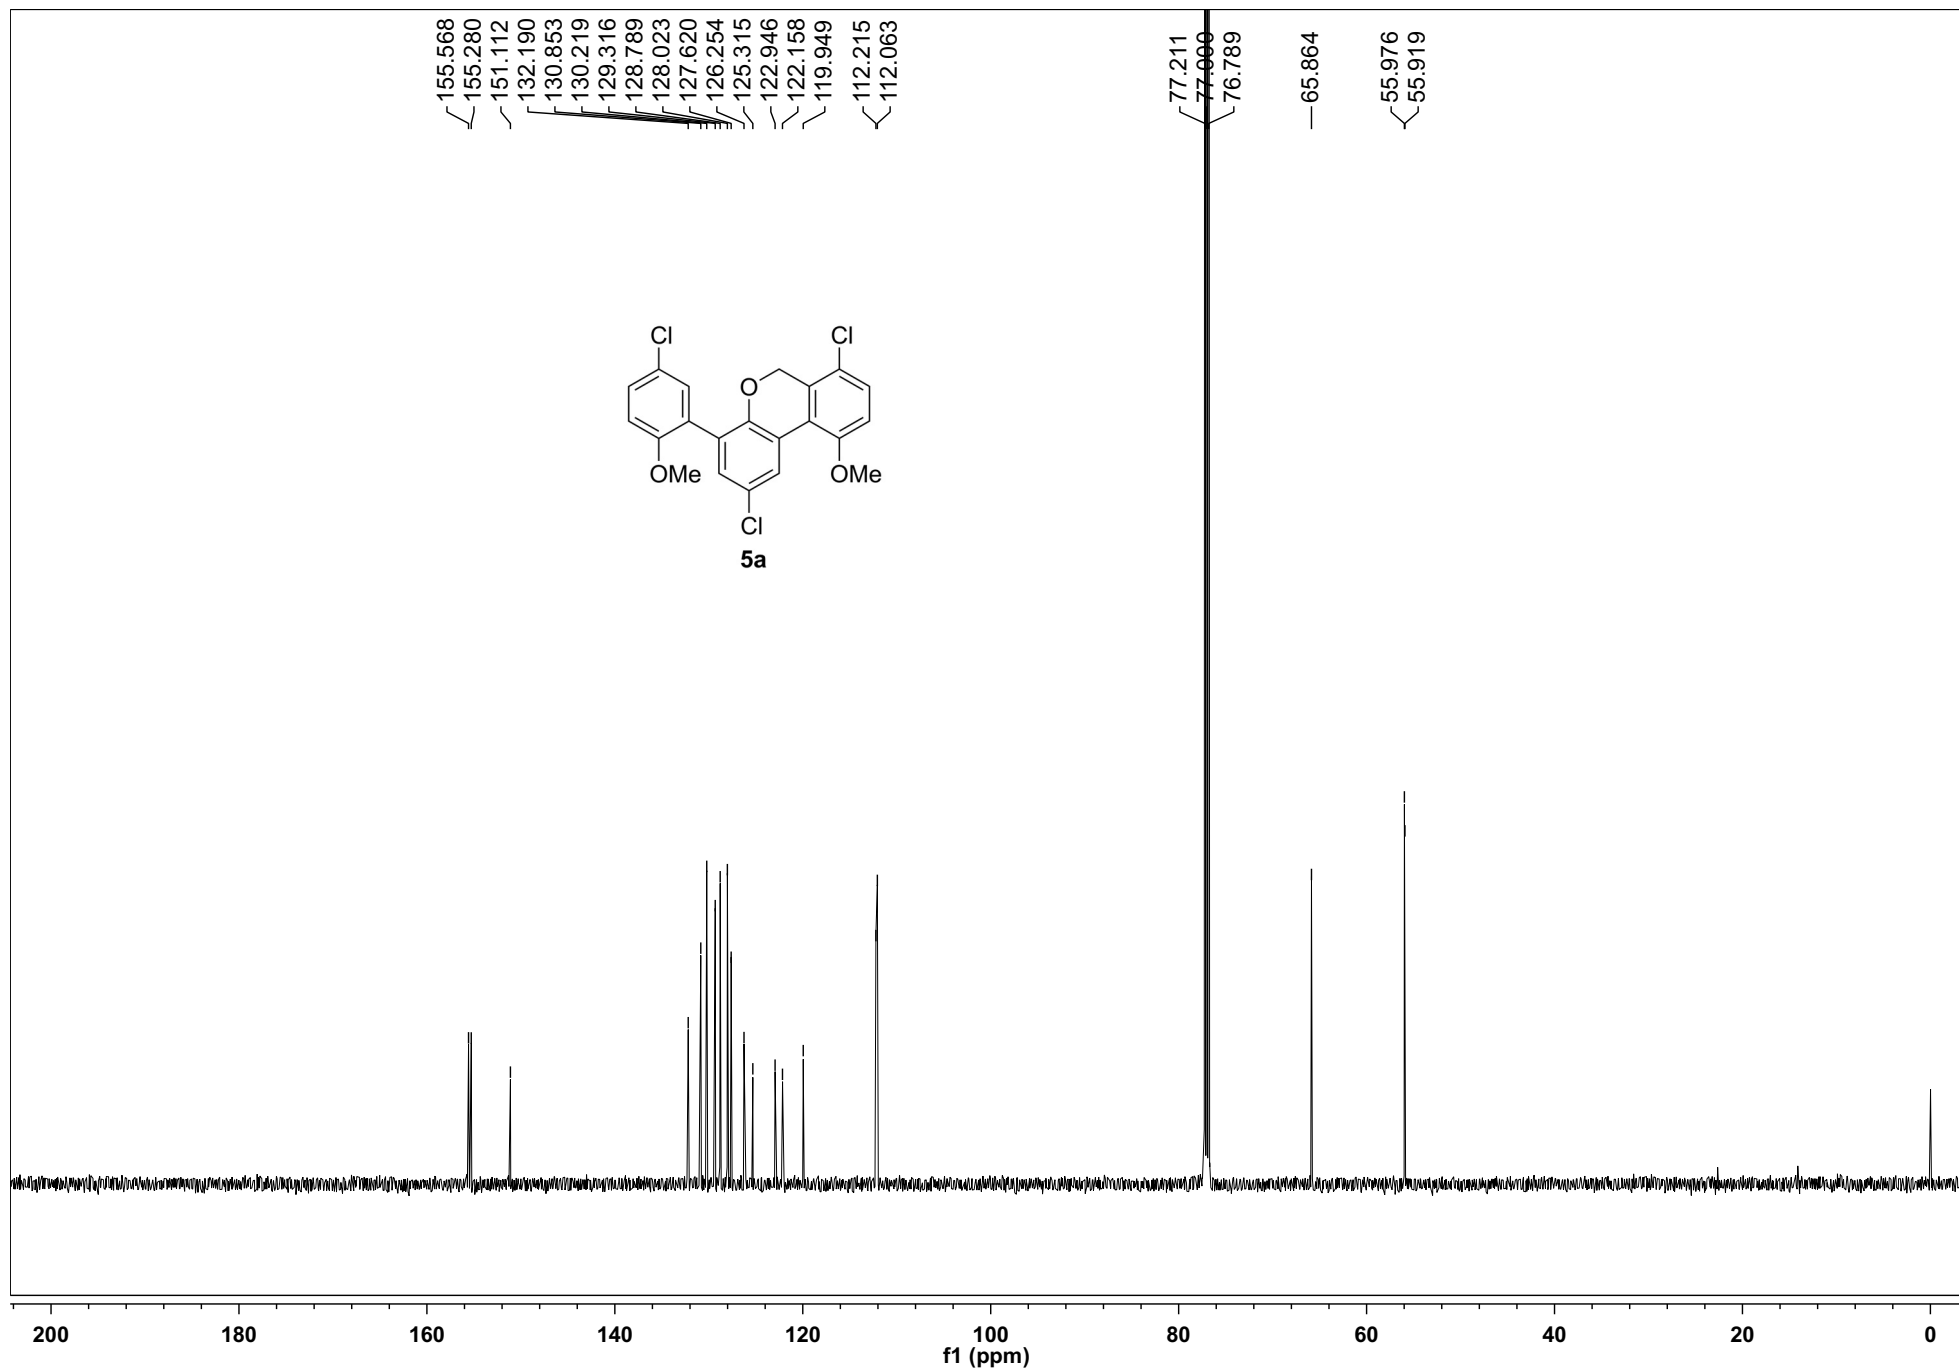

Figure S59. <sup>1</sup>H NMR spectrum (600 MHz, CDCl<sub>3</sub>) of 5i

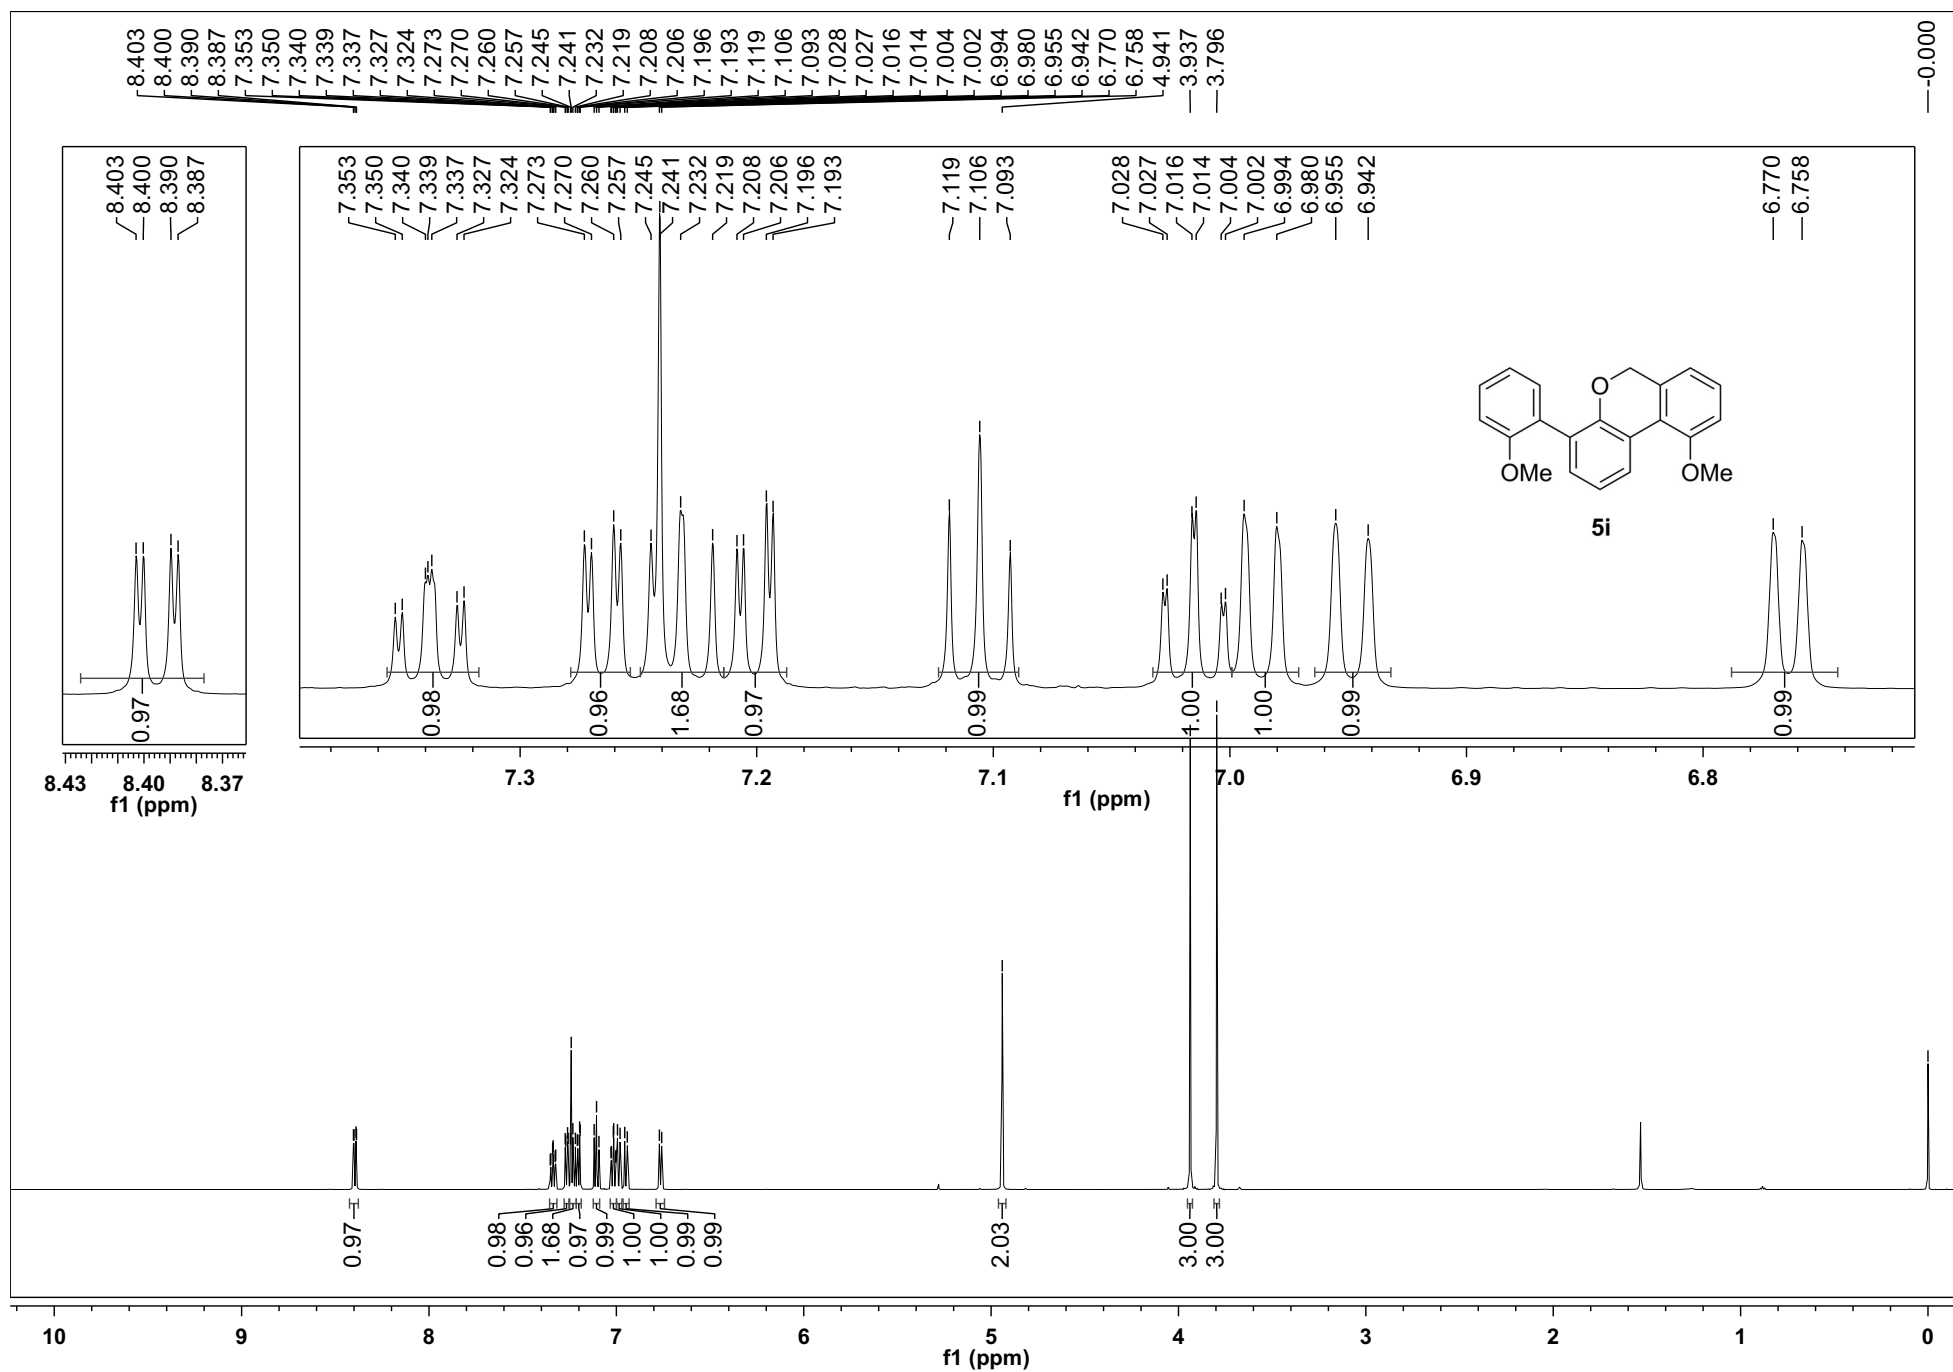

Figure S60.  $^{13}\text{C}\{^1\text{H}\}$  NMR spectrum (150 MHz,  $\text{CDCl}_3$ ) of **5i**

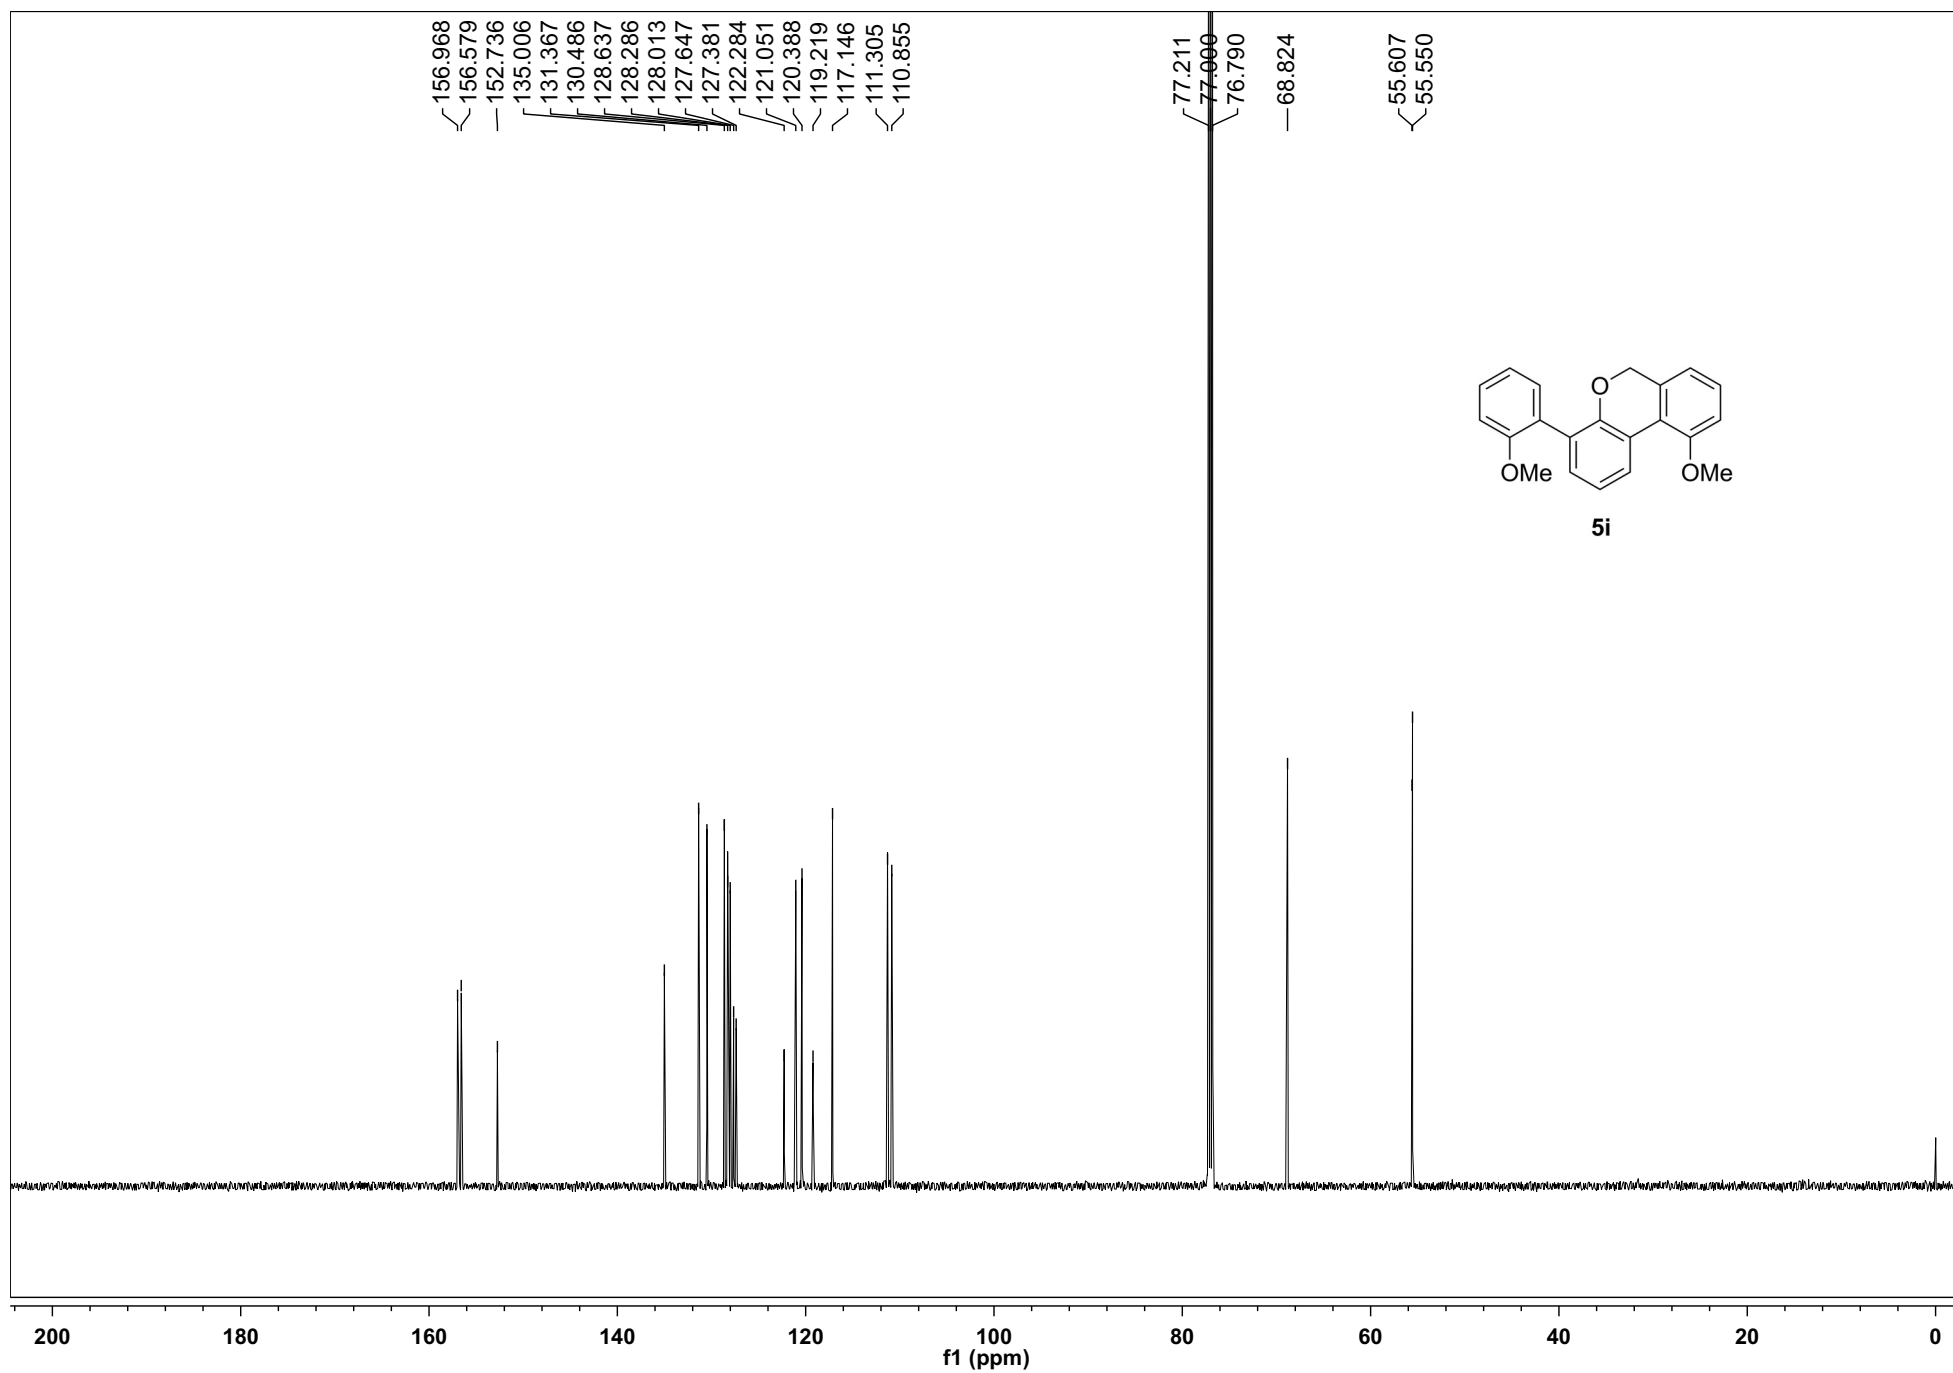

Supplement: d2qo00738j1.pdf [file d2qo00738j1.pdf]
